# Supplementary material for: The Value of GeneXpert MTB/RIF for Detection in Tuberculosis: A Bibliometrics-Based Analysis and Review
Source: J Anal Methods Chem. 2022 Oct 15;2022:2915018. doi: 10.1155/2022/2915018 (PMC9588380; doi:10.1155/2022/2915018)
Supplement: Supplementary Materials — The supporting information includes the original data used in the bibliometric analysis. [file 2915018.f1.txt]

FN Clarivate Analytics Web of Science
VR 1.0
PT J
AU Evans, CA
AF Evans, Carlton A.
TI GeneXpert-A Game-Changer for Tuberculosis Control?
SO PLOS MEDICINE
LA English
DT Editorial Material
ID MULTIDRUG-RESISTANT TUBERCULOSIS; MYCOBACTERIUM-TUBERCULOSIS; RIFAMPIN
   RESISTANCE; DRUG-RESISTANCE; DIAGNOSIS; MTB/RIF; TB; COUNTRIES; POVERTY;
   TRENDS
C1 [Evans, Carlton A.] Univ Peruana Cayetano Heredia, Lima, Peru.
   [Evans, Carlton A.] Univ London Imperial Coll Sci Technol & Med, London, England.
   [Evans, Carlton A.] IFHAD Innovat Hlth & Dev, London, England.
RP Evans, CA (通讯作者)，Univ Peruana Cayetano Heredia, Lima, Peru.
EM carlton.evans@ifhad.org
OI Evans, Carlton/0000-0002-6873-5447
FU Wellcome Trust Funding Source: Medline
CR Benatar SR, 2010, INT J TUBERC LUNG D, V14, P1215
   Blakemore R, 2010, J CLIN MICROBIOL, V48, P2495, DOI 10.1128/JCM.00128-10
   Boehme CC, 2011, LANCET, V377, P1495, DOI 10.1016/S0140-6736(11)60438-8
   Boehme CC, 2010, NEW ENGL J MED, V363, P1005, DOI 10.1056/NEJMoa0907847
   Chaudhary M, 2010, INDIAN J MED MICROBI, V28, P281, DOI 10.4103/0255-0857.71805
   Cox H, 2006, PLOS MED, V3, P1836, DOI 10.1371/journal.pmed.0030384
   Creswell J, 2011, INT J TUBERC LUNG D, V15, P431, DOI 10.5588/ijtld.10.0654
   Dowdy DW, 2011, PLOS MED, V8, DOI 10.1371/journal.pmed.1001063
   Dye C, 2009, B WORLD HEALTH ORGAN, V87, P683, DOI 10.2471/BLT.08.058453
   Edginton ME, 2010, INT J TUBERC LUNG D, V14, P1094
   Furin J, 2011, INT J TUBERC LUNG D, V15, P1294, DOI 10.5588/ijtld.10.0591
   Helb D, 2010, J CLIN MICROBIOL, V48, P229, DOI 10.1128/JCM.01463-09
   Hinderaker SG, 2011, INT J TUBERC LUNG D, V15, P71
   Kawai V, 2006, AM J TROP MED HYG, V75, P1027, DOI 10.4269/ajtmh.2006.75.1027
   Lawn SD, 2011, PLOS MED, V8, DOI 10.1371/journal.pmed.1001067
   Lonnroth K, 2010, LANCET, V375, P1814, DOI 10.1016/S0140-6736(10)60483-7
   Martinez D, 2010, PLOS ONE, V5, DOI 10.1371/journal.pone.0012082
   Mitnick C, 2003, NEW ENGL J MED, V348, P119, DOI 10.1056/NEJMoa022928
   Nathanson E, 2010, NEW ENGL J MED, V363, P1050, DOI 10.1056/NEJMra0908076
   Otero L, 2010, TROP MED INT HEALTH, V15, P1475, DOI 10.1111/j.1365-3156.2010.02645.x
   Oxlade O, 2009, INT J TUBERC LUNG D, V13, P1238
   Pai M, 2008, PLOS MED, V5, P1043, DOI 10.1371/journal.pmed.0050156
   Rasanathan K, 2011, Int J Tuberc Lung Dis, V15 Suppl 2, P30, DOI 10.5588/ijtld.10.0691
   Resch SC, 2006, PLOS MED, V3, P1048, DOI 10.1371/journal.pmed.0030241
   Scott LE, 2011, PLOS MED, V8, DOI 10.1371/journal.pmed.1001061
   Small PM, 2010, NEW ENGL J MED, V363, P1070, DOI 10.1056/NEJMe1008496
   Stall N, 2011, INT J TUBERC LUNG D, V15, P641, DOI 10.5588/ijtld.10.0195
   Van Rie A, 2010, EXPERT REV MOL DIAGN, V10, P937, DOI [10.1586/erm.10.67, 10.1586/ERM.10.67]
   *WHO, 2004, PRACT APPR LUNG HLTH
   Wilson ML, 2011, CLIN INFECT DIS, V52, P1350, DOI 10.1093/cid/cir146
   [World Health Organization Stop TB Department], 2010, ROADM ROLL OUT XPERT
   World Health Organization, 2010, MULTIDRUG EXTENSIVEL
   [World Health Organization WHO], 2010, GLOB TUB CONTR
NR 33
TC 111
Z9 113
U1 0
U2 11
PU PUBLIC LIBRARY SCIENCE
PI SAN FRANCISCO
PA 1160 BATTERY STREET, STE 100, SAN FRANCISCO, CA 94111 USA
SN 1549-1676
J9 PLOS MED
JI PLos Med.
PD JUL
PY 2011
VL 8
IS 7
AR e1001064
DI 10.1371/journal.pmed.1001064
PG 4
WC Medicine, General & Internal
WE Science Citation Index Expanded (SCI-EXPANDED)
SC General & Internal Medicine
GA 797ZQ
UT WOS:000293169700013
PM 21814497
OA Green Published, gold, Green Submitted
DA 2022-08-20
ER

PT J
AU Held, M
   Laubscher, M
   Zar, HJ
   Dunn, RN
AF Held, M.
   Laubscher, M.
   Zar, H. J.
   Dunn, R. N.
TI GeneXpert polymerase chain reaction for spinal tuberculosis
SO BONE & JOINT JOURNAL
LA English
DT Article
ID DIAGNOSIS
AB The lack of an accurate, rapid diagnostic test for mycobacterium tuberculosis (TB) is a major handicap in the management of spinal TB. GeneXpert, a new, rapid molecular diagnostic test is recommended as the first line investigation for suspected pulmonary TB in areas with a high prevalence of HIV or drug resistance, yet it has not been validated for the diagnosis of musculoskeletal TB.
   The aim of this study was to assess the accuracy of GeneXpert in diagnosing spinal TB.
   A prospective clinical study of 69 consecutive adults with suspected spinal TB was conducted at a tertiary hospital in an area with the highest incidence and prevalence of TB in the world. GeneXpert was used on tissue samples of the enrolled patients and its diagnostic accuracy compared with a reference standard of tissue in liquid culture. A total of 71 spine samples from 69 patients (two re-biopsies) were included in the study.
   The GeneXpert test showed a sensitivity of 95.6% and specificity of 96.2% for spinal TB. The results of the GeneXpert test were available within 48 hours compared with a median of 35 days (IQR 15 to 43) for cultures. All cases of multi-drug resistant TB (MDR TB) were diagnosed accurately with the GeneXpert test. The MDR TB rate was 5.8%.
C1 Groote Schuur Hosp, ZA-7925 Cape Town, South Africa.
   Red Cross Childrens Hosp, Cape Town, South Africa.
RP Held, M (通讯作者)，Univ Cape Town, Dept Orthopaed Surg, Groote Schuur Hosp, H49 Old Main Bldg, ZA-7925 Observatory, South Africa.
EM Michael.held@uct.ac.za
RI Laubscher, Maritz/AAY-2382-2020; Dunn, Robert/AAK-3962-2021
OI Laubscher, Maritz/0000-0002-5989-8383; Dunn, Robert/0000-0002-3689-0346;
   Held, Michael/0000-0002-0671-0439
CR Cattamanchi A, 2009, CLIN INFECT DIS, V48, P179, DOI 10.1086/595689
   Davies AP, 1999, J INFECTION, V39, P205, DOI 10.1016/S0163-4453(99)90050-6
   Hillemann D, 2011, J CLIN MICROBIOL, V49, P1202, DOI 10.1128/JCM.02268-10
   Jain AK, 2002, CLIN ORTHOP RELAT R, P75
   Kramer N, 1997, B RHEUM DIS, V46, P5
   Monni T, 2012, SA orthop. j., V11, P23
   Negi S S, 2005, Indian J Med Microbiol, V23, P245
   Pandey V, 2009, INT ORTHOP, V33, P801, DOI 10.1007/s00264-007-0485-8
   Peters D, 2012, INT J TUBERC LUNG D, V16, P702, DOI 10.5588/ijtld.12.0034
   Rachow A, 2011, PLOS ONE, V6, DOI 10.1371/journal.pone.0020458
   Rajasekaran S, 2002, CLIN ORTHOP RELAT R, P85
   Rasit A H, 2001, Med J Malaysia, V56, P143
   Singh KK, J CLIN PATHOL, V53, P355
   SMITH GW, 1958, J BONE JOINT SURG AM, V40, P607, DOI 10.2106/00004623-195840030-00009
   Steingart KR, 2013, COCHRANE DB SYST REV, DOI 10.1002/14651858.CD009593.pub2
   Sun Y, 1997, Zhonghua Jie He He Hu Xi Za Zhi, V20, P145
   Theron G, 2011, LANCET, V6, P378
   Tiwari V, 2003, INDIAN J MED RES, V118, P224
NR 18
TC 54
Z9 61
U1 0
U2 8
PU BRITISH EDITORIAL SOC BONE JOINT SURGERY
PI LONDON
PA 22 BUCKINGHAM STREET, LONDON WC2N 6ET, ENGLAND
SN 2049-4394
J9 BONE JOINT J
JI Bone Joint J.
PD OCT
PY 2014
VL 96B
IS 10
BP 1366
EP 1369
DI 10.1302/0301-620X.96B10.34048
PG 4
WC Orthopedics; Surgery
WE Science Citation Index Expanded (SCI-EXPANDED)
SC Orthopedics; Surgery
GA AQ8IM
UT WOS:000343069200015
PM 25274923
DA 2022-08-20
ER

PT J
AU Georghiou, SB
   Alagna, R
   Cirillo, DM
   Carmona, S
   Ruhwald, M
   Schumacher, SG
AF Georghiou, Sophia B.
   Alagna, Riccardo
   Cirillo, Daniela M.
   Carmona, Sergio
   Ruhwald, Morten
   Schumacher, Samuel G.
TI Equivalence of the GeneXpert System and GeneXpert Omni System for
   tuberculosis and rifampicin resistance detection
SO PLOS ONE
LA English
DT Article
ID XPERT MTB/RIF ULTRA
AB A laboratory validation study was conducted to assess the equivalence of Xpert MTB/RIF Ultra testing on the GeneXpert System and the GeneXpert Omni System ('Omni') for tuberculosis and rifampicin resistance. High concordance of the two devices was demonstrated for well-characterized clinical samples as well as control materials, with controls tested on Omni at normal and challenging environmental conditions (i.e. 35 degrees C, 90% relative humidity). Equivalence of the Cts for all probes was also shown. Equivalence was demonstrated for the Omni and GeneXpert devices for tuberculosis and rifampicin resistance detection for a diverse range of clinical specimens and environmental conditions.
C1 [Georghiou, Sophia B.; Carmona, Sergio; Ruhwald, Morten; Schumacher, Samuel G.] FIND, Global Alliance Diagnost, Geneva, Switzerland.
   [Alagna, Riccardo; Cirillo, Daniela M.] IRCCS San Raffaele Sci Inst, Milan, Italy.
RP Ruhwald, M (通讯作者)，FIND, Global Alliance Diagnost, Geneva, Switzerland.
EM marten.ruhwald@finddx.org
OI Schumacher, Samuel G/0000-0002-6136-206X; Georghiou,
   Sophia/0000-0003-0099-903X
CR Albert H, 2016, EUR RESPIR J, V48, P516, DOI 10.1183/13993003.00543-2016
   Annabel B., 2019, GLOBAL TUBERCULOSIS
   Arend SM, 2018, LANCET INFECT DIS, V18, P8, DOI 10.1016/S1473-3099(17)30695-3
   Cepheid. GeneXpert, 2020, IVD CE 301 8202 REV
   Chakravorty S, 2017, MBIO, V8, DOI [10.1128/mBio.00812-17, 10.1128/mbio.00812-17]
   Christl L., 2016, OVERVIEW REGULATORY
   Dorman SE, 2018, LANCET INFECT DIS, V18, P76, DOI [10.1016/S1473-3099(17)30691-6, 10.1016/s1473-3099(17)30691-6]
   Ruhwald M, 2021, LANCET MICROBE, V2, pE169, DOI 10.1016/S2666-5247(21)00057-4
   WHO, 2012, GLOBAL TUBERCULOSIS REPORT 2012, P1
   World Health Organization (WHO), 2020, RAPID COMMUNICATION
   Xpert, OMN MTB RIF ULTRA CE
NR 11
TC 0
Z9 0
U1 0
U2 0
PU PUBLIC LIBRARY SCIENCE
PI SAN FRANCISCO
PA 1160 BATTERY STREET, STE 100, SAN FRANCISCO, CA 94111 USA
SN 1932-6203
J9 PLOS ONE
JI PLoS One
PD DEC 17
PY 2021
VL 16
IS 12
AR e0261442
DI 10.1371/journal.pone.0261442
PG 7
WC Multidisciplinary Sciences
WE Science Citation Index Expanded (SCI-EXPANDED)
SC Science & Technology - Other Topics
GA YZ0LO
UT WOS:000755175100038
PM 34919559
OA Green Published, gold
DA 2022-08-20
ER

PT J
AU Stevens, WS
   Scott, L
   Noble, L
   Gous, N
   Dheda, K
AF Stevens, Wendy Susan
   Scott, Lesley
   Noble, Lara
   Gous, Natasha
   Dheda, Keertan
TI Impact of the GeneXpert MTB/RIF Technology on Tuberculosis Control
SO MICROBIOLOGY SPECTRUM
LA English
DT Article
ID DRUG-RESISTANT TUBERCULOSIS; SPUTUM SMEAR MICROSCOPY; LINE PROBE ASSAY;
   XPERT MTB/RIF; MYCOBACTERIUM-TUBERCULOSIS; DIAGNOSTIC PERFORMANCE;
   COST-EFFECTIVENESS; VERSION V2.0; TB IMPACT; PCR ASSAY
AB Molecular technology revolutionized the diagnosis of tuberculosis (TB) with a paradigm shift to faster, more sensitive, clinically relevant patient care. The most recent molecular leader is the GeneXpert MTB/RIF assay (Xpert) (Cepheid, Sunnyvale, CA), which was endorsed by the World Health Organization with unprecedented speed in December 2010 as the initial diagnostic for detection of HIV-associated TB and for where high rates of drug resistance are suspected. South Africa elected to take an aggressive smear replacement approach to facilitate earlier diagnosis and treatment through the decision to implement the Xpert assay nationally in March 2011, against the backdrop of approximately 6.3 million HIV-infected individuals, one of highest global TB and HIV coinfection rates, no available implementation models, uncertainties around field performance and program costs, and lack of guidance on how to operationalize the assay into existing complex clinical algorithms. South Africa's national implementation was conducted as a phased, forecasted, and managed approach (March 2011 to September 2013), through political will and both treasury-funded and donor-funded support. Today there are 314 GeneXperts across 207 microscopy centers; over 8 million assays have been conducted, and South Africa accounts for over half the global test cartridge usage. As with any implementation of new technology, challenges were encountered, both predicted and unexpected. This chapter discusses the challenges and consequences of such large-scale implementation efforts, the opportunities for new innovations, and the need to strengthen health systems, as well as the impact of the Xpert assay on rifampin-sensitive and multidrug-resistant TB patient care that translated into global TB control as we move toward the sustainable development goals.
C1 [Stevens, Wendy Susan; Gous, Natasha] Univ Witwatersrand, Fac Hlth Sci, Dept Mol Med & Haematol, Johannesburg, South Africa.
   [Stevens, Wendy Susan; Gous, Natasha] Natl Hlth Lab Serv, Johannesburg, South Africa.
   [Stevens, Wendy Susan; Gous, Natasha] Natl Hlth Lab Serv, Natl Prior Program, Johannesburg, South Africa.
   [Scott, Lesley; Noble, Lara] Univ Witwatersrand, Fac Hlth Sci, Dept Mol Med & Haematol, Johannesburg, Gauteng, South Africa.
   [Dheda, Keertan] Univ Cape Town, Dept Med, Div Pulmonol, Lung Infect & Immun Unit, Cape Town, South Africa.
   [Dheda, Keertan] Univ Cape Town, UCT Lung Inst, Dept Med, Cape Town, South Africa.
RP Stevens, WS (通讯作者)，Univ Witwatersrand, Fac Hlth Sci, Dept Mol Med & Haematol, Johannesburg, South Africa.; Stevens, WS (通讯作者)，Natl Hlth Lab Serv, Johannesburg, South Africa.; Stevens, WS (通讯作者)，Natl Hlth Lab Serv, Natl Prior Program, Johannesburg, South Africa.
EM wendy.stevens@nhls.ac.za
OI Noble, Lara/0000-0002-4661-9023
FU MRC [MC_PC_16021] Funding Source: UKRI; Medical Research Council
   [MC_PC_16021] Funding Source: Medline
CR Abubakar I, 2016, BMC MED, V14, DOI 10.1186/s12916-016-0599-1
   Al-Darraji HAA, 2013, PLOS ONE, V8, DOI 10.1371/journal.pone.0073717
   Alvarez GG, 2015, CHEST, V148, P767, DOI 10.1378/chest.14-2948
   Anderson ST, 2014, NEW ENGL J MED, V370, P1712, DOI 10.1056/NEJMoa1303657
   Annabel B., 2019, GLOBAL TUBERCULOSIS
   [Anonymous], 2013, XPERT MTBRIF ASS DIA
   Apers L, 2003, INT J TUBERC LUNG D, V7, P376
   Balcha TT, 2014, PLOS ONE, V9, DOI 10.1371/journal.pone.0085478
   Barnard M, 2012, J CLIN MICROBIOL, V50, P3712, DOI 10.1128/JCM.01958-12
   Basu S, 2007, LANCET, V370, P1500, DOI 10.1016/S0140-6736(07)61636-5
   Black A, 2013, SAMJ S AFR MED J, V103, P355, DOI [10.7196/samj.6896, 10.7196/SAMJ.6896]
   Bratton DJ, 2011, INT J TUBERC LUNG D, V15, P440, DOI 10.5588/ijtld.10.0732
   Brossier F, 2016, J CLIN MICROBIOL, V54, P1573, DOI 10.1128/JCM.00051-16
   Ramirez HLB, 2014, INT J TUBERC LUNG D, V18, P435, DOI 10.5588/ijtld.13.0747
   Calligaro GL, 2017, LANCET INFECT DIS, V17, P441, DOI 10.1016/S1473-3099(16)30384-X
   Cattamanchi A, 2009, BMC INFECT DIS, V9, DOI 10.1186/1471-2334-9-53
   Chaisson LH, 2014, CLIN INFECT DIS, V59, P1353, DOI 10.1093/cid/ciu620
   Churchyard GJ, 2015, LANCET GLOB HEALTH, V3, pE450, DOI 10.1016/S2214-109X(15)00100-X
   Cox H, 2008, LANCET, V372, P1363, DOI 10.1016/S0140-6736(08)61205-2
   Cox HS, 2015, OPEN FORUM INFECT DI, V2, DOI 10.1093/ofid/ofv014
   Cox HS, 2014, PLOS MED, V11, DOI 10.1371/journal.pmed.1001760
   Crampin AC, 2001, INT J TUBERC LUNG D, V5, P994
   Creswell J, 2015, INT J TUBERC LUNG D, V19, P545, DOI 10.5588/ijtld.14.0775
   Crudu V, 2012, J CLIN MICROBIOL, V50, P1264, DOI 10.1128/JCM.05903-11
   Dalovisio JR, 1996, CLIN INFECT DIS, V23, P1099, DOI 10.1093/clinids/23.5.1099
   Davis JL, 2014, AM J RESP CRIT CARE, V189, P1551, DOI 10.1164/rccm.201311-1974OC
   Department of Health South Africa South African National AIDS Council, 2016, S AFR HIV TB INV CAS
   Dheda K, 2016, LANCET, V387, P1211, DOI 10.1016/S0140-6736(15)00151-8
   Dheda K, 2014, LANCET GLOB HEALTH, V2, pE554, DOI 10.1016/S2214-109X(14)70305-5
   Di Tanna G Luca, 2015, 46 UN WORLD C LUNG H
   Directorate Drug-Resistant TB TB & HIV, 2011, MAN DRUG RES TUB POL
   Dlamini-Mvelase NR, 2014, BMC INFECT DIS, V14, DOI 10.1186/1471-2334-14-442
   Dowdy DW, 2014, INT J TUBERC LUNG D, V18, P1012, DOI 10.5588/ijtld.13.0851
   Durovni B, 2014, PLOS MED, V11, DOI 10.1371/journal.pmed.1001766
   Garnett GP, 2011, LANCET, V378, P515, DOI 10.1016/S0140-6736(10)61505-X
   Hanrahan CF, 2015, INT J TUBERC LUNG D, V19, P811, DOI 10.5588/ijtld.15.0013
   Hanrahan CF, 2016, OPEN FORUM INFECT DI, V3, DOI 10.1093/ofid/ofw068
   Hanrahan CF, 2013, PLOS ONE, V8, DOI 10.1371/journal.pone.0065421
   Houben RMGJ, 2016, BMC MED, V14, DOI 10.1186/s12916-016-0608-4
   Jonsson B, 2015, INFECT DIS-NOR, V47, P231, DOI 10.3109/00365548.2014.987162
   Knight GM, 2016, INT J INFECT DIS, V42, P17, DOI 10.1016/j.ijid.2015.10.024
   Kranzer K, 2010, LANCET INFECT DIS, V10, P93, DOI 10.1016/S1473-3099(09)70326-3
   Langley I, 2014, LANCET GLOB HEALTH, V2, pE581, DOI 10.1016/S2214-109X(14)70291-8
   Lawn SD, 2011, FUTURE MICROBIOL, V6, P1067, DOI [10.2217/fmb.11.84, 10.2217/FMB.11.84]
   Lee MR, 2013, J MED MICROBIOL, V62, P1160, DOI 10.1099/jmm.0.052043-0
   Lorent N, 2015, INT J TUBERC LUNG D, V19, P1528, DOI 10.5588/ijtld.14.0956
   Luoto J, 2013, PLOS MED, V10, DOI 10.1371/journal.pmed.1001469
   Manabe YC, 2015, OPEN FORUM INFECT DI, V2, DOI 10.1093/ofid/ofv030
   Matabane MMZ, 2015, BMC INFECT DIS, V15, DOI 10.1186/s12879-015-1229-9
   Mbonze NB, 2016, INT J TUBERC LUNG D, V20, P240, DOI 10.5588/ijtld.15.0177
   Menzies NA, 2012, PLOS MED, V9, DOI 10.1371/journal.pmed.1001347
   Moore DAJ, 2016, BMC MED, V14, DOI 10.1186/s12916-016-0610-x
   Moyenga I, 2015, INT J TUBERC LUNG D, V19, P285, DOI 10.5588/ijtld.14.0629
   Mupfumi L, 2014, OPEN FORUM INFECT DI, V1, DOI 10.1093/ofid/ofu038
   National Health Laboratory Service, 2014, GENEXPERT MTB RIF PR
   Nguyen TQN, 2013, BMC INFECT DIS, V13, DOI 10.1186/1471-2334-13-31
   Nicol MP, 2013, LANCET RESP MED, V1, P427, DOI 10.1016/S2213-2600(13)70133-4
   O'Grady J, 2012, CLIN INFECT DIS, V55, P1171, DOI 10.1093/cid/cis631
   Omrani AS, 2014, INFECT CHEMOTHER, V46, P30, DOI 10.3947/ic.2014.46.1.30
   Opota O, 2016, CLIN MICROBIOL INFEC, V22, P613, DOI 10.1016/j.cmi.2016.04.010
   Qin ZZ, 2015, EUR RESPIR J, V45, P549, DOI 10.1183/09031936.00147714
   Rufai SB, 2014, J CLIN MICROBIOL, V52, P1846, DOI 10.1128/JCM.03005-13
   Sachdeva KS, 2015, PLOS ONE, V10, DOI 10.1371/journal.pone.0131438
   Sachdeva KS, 2015, PLOS ONE, V10, DOI 10.1371/journal.pone.0126065
   Salje H, 2014, PLOS MED, V11, DOI 10.1371/journal.pmed.1001674
   Sanchez-Padilla E, 2015, NEW ENGL J MED, V372, P1181, DOI 10.1056/NEJMc1413930
   Schnippel K, 2013, SAMJ S AFR MED J, V103, P101, DOI [10.7196/SAMJ.6182, 10.7196/samj.6182]
   Schumacher SG, 2015, INT J TUBERC LUNG D, V19, P1084, DOI 10.5588/ijtld.15.0120
   Scott CP, 2002, J CLIN MICROBIOL, V40, P3219, DOI 10.1128/JCM.40.9.3219-3222.2002
   Scott L, 2015, 46 UN WORLD C LUNG H
   Scott LE, 2011, J CLIN MICROBIOL, V49, P4356, DOI 10.1128/JCM.05167-11
   Scott L, 2014, J CLIN MICROBIOL, V52, P2493, DOI 10.1128/JCM.03533-13
   Scott LE, 2011, PLOS MED, V8, DOI 10.1371/journal.pmed.1001061
   Selvakumar N, 2002, J CLIN MICROBIOL, V40, P3017, DOI 10.1128/JCM.40.8.3017-3020.2002
   Singla Neeta, 2009, Indian J Tuberc, V56, P206
   Sohn H, 2014, CLIN INFECT DIS, V58, P970, DOI 10.1093/cid/ciu022
   South African National Department of Health, 2014, NAT DEP HLTH ANN PER
   Stagg HR, 2016, EMERG INFECT DIS, V22, P482, DOI 10.3201/eid2203.151227
   Steingart KR, 2014, COCHRANE DB SYST REV, DOI [10.1002/14651858.CD009593.pub3, 10.1002/14651858.CD009593.pub2]
   Stevens WS, 2010, J INFECT DIS, V201, pS78, DOI 10.1086/650383
   Stevens WS, 2016, MOL MICROBIOLOGY DIA
   Swai Hedwiga F, 2011, BMC Res Notes, V4, P475, DOI 10.1186/1756-0500-4-475
   Tagliani E, 2015, J CLIN MICROBIOL, V53, P2961, DOI 10.1128/JCM.01257-15
   Theron G, 2015, LANCET, V386, P2324, DOI 10.1016/S0140-6736(15)00321-9
   Theron G, 2014, COCHRANE DB SYST REV, DOI 10.1002/14651858.CD010705.pub2
   Theron G, 2014, LANCET INFECT DIS, V14, P527, DOI 10.1016/S1473-3099(13)70360-8
   Theron G, 2014, LANCET, V383, P424, DOI 10.1016/S0140-6736(13)62073-5
   Theron G, 2013, THORAX, V68, P1043, DOI 10.1136/thoraxjnl-2013-203485
   Theron G, 2011, AM J RESP CRIT CARE, V184, P132, DOI 10.1164/rccm.201101-0056OC
   Trajman A, 2016, PLOS ONE, V11, DOI 10.1371/journal.pone.0156471
   Trajman A, 2015, PLOS ONE, V10, DOI 10.1371/journal.pone.0123252
   UNAIDS, 2013, S AFR HIV AIDS EST 2
   UNITAID, 2015, UNITAID TUB DIAGN TE, Vfourth.
   UNITAID, 2014, TUB DIAGN TECHN LAND
   Uplekar Mukund, 2015, Indian J Tuberc, V62, P61, DOI 10.1016/j.ijtb.2015.03.001
   Van den Handel T, 2015, INT J TUBERC LUNG D, V19, P392, DOI 10.5588/ijtld.14.0653
   van Kampen SC, 2015, PLOS ONE, V10, DOI 10.1371/journal.pone.0123536
   van Kampen SC, 2015, PLOS ONE, V10, DOI 10.1371/journal.pone.0136368
   van Kampen SC, 2015, PLOS ONE, V10, DOI 10.1371/journal.pone.0132514
   Vassall A, 2011, PLOS MED, V8, DOI 10.1371/journal.pmed.1001120
   Wang JY, 2004, J CLIN MICROBIOL, V42, P4599, DOI 10.1128/JCM.42.10.4599-4603.2004
   WHO, 2020, GLOB TUB REP
   WHO, 2010, POL FRAM IMPL NEW TU
   Witney AA, 2016, BMC MED, V14, DOI 10.1186/s12916-016-0598-2
   World Health Organization, 2016, WHO TREATM GUID DRUG
   World Health Organization, 2008, POL STAT
   World Health Organization, 2014, WHO MON XPERT MTB RI
   World Health Organization, 2014, WHO END TB STRAT
   World Health Organization, 2014, WHOHTMTB201408
   World Health Organization (WHO), 2016, US MOL LIN PROB ASS
   Yoon C, 2012, PLOS ONE, V7, DOI 10.1371/journal.pone.0048599
NR 111
TC 27
Z9 27
U1 0
U2 9
PU AMER SOC MICROBIOLOGY
PI WASHINGTON
PA 1752 N ST NW, WASHINGTON, DC 20036-2904 USA
SN 2165-0497
J9 MICROBIOL SPECTR
JI Microbiol. Spectr.
PD FEB
PY 2017
VL 5
IS 1
AR TBTB2-0040-2016
DI 10.1128/microbiolspec.TBTB2-0040-2016
PG 21
WC Microbiology
WE Science Citation Index Expanded (SCI-EXPANDED)
SC Microbiology
GA EP3HY
UT WOS:000397274600017
PM 28155817
DA 2022-08-20
ER

PT J
AU Shao, Y
   Peng, H
   Chen, C
   Zhu, T
   Ji, M
   Jiang, W
   Zhu, W
   Zhai, XJ
   Lu, W
AF Shao, Yan
   Peng, Hong
   Chen, Cheng
   Zhu, Tao
   Ji, Ming
   Jiang, Wei
   Zhu, Wei
   Zhai, Xiang Jun
   Lu, Wei
TI Evaluation of GeneXpert MTB/RIF for detection tuberculosis at peripheral
   tuberculosis clinics of pulmonary
SO MICROBIAL PATHOGENESIS
LA English
DT Article
DE Mycobacterium tuberculosis; Real-time polymerase chain reaction;
   Smear-negative
ID MYCOBACTERIUM-TUBERCULOSIS; XPERT MTB/RIF; EXTRAPULMONARY TUBERCULOSIS;
   RIFAMPIN RESISTANCE; DIAGNOSIS; ASSAY; SMEAR; CULTURE
AB Tuberculosis is one of the most common infectious diseases in China, while delayed patient finding obstructed disease control, especially for smear-negative patients. The current study was undertaken to evaluate the diagnostic accuracy of GeneXpert MTB/RIF compared with conventional methods in the detection of pulmonary tuberculosis patients. A total of 295 spot sputum samples from confirmed pulmonary tuberculosis patients were evaluated from September 2014 to June 2015. Each sample was examined by acid-fast bacillus smear microscopy, culture and GeneXpert MTB/RIF. The sputum culture onLowenstein-Jensen (L-J)was considered as the gold-standard. After testing by smear, 68.81% (203/ 295) was negative and 31.19% (92/295) was positive. As thegold-standard,L-J culture detected 37.97% (112/295) positive of all specimens, while the positivity for GeneXpert MTB/RIF was 46.44% (137/295). Compared with L-J culture, the combined sensitivity, specificity, positive predictive value (PPV) and negative predictive value (NPV) for GeneXpert MTB/RIF were 94.64%, 82.97%, 77.37% and 96.18% respectively. For smear-negative specimens, the sensitivity, specificity, PPV and NPV for GeneXpert MTB/ RIF were 96.00%, 83.05%, 44.44% and 99.32%; while for smear-positive specimens, the corresponding accuracy values were 94.25%, 80.00%, 98.80% and 44.44%. The findings of study indicated that GeneXpert MTB/RIF assay demonstrated a high sensitivity in detecting Mycobacterium tuberculosis compared to smear method and a high NPV among smear negative patients. (C) 2017 Elsevier Ltd. All rights reserved.
C1 [Shao, Yan; Peng, Hong; Chen, Cheng; Zhai, Xiang Jun; Lu, Wei] Ctr Dis Control & Prevent Jiangsu Prov, Nanjing, Jiangsu, Peoples R China.
   [Zhu, Tao] Ctr Dis Control & Prevent Danyang City, Danyang, Peoples R China.
   [Ji, Ming; Zhu, Wei] Ctr Dis Control & Prevent Taixing City, Taixing, Peoples R China.
   [Jiang, Wei] Ctr Dis Control & Prevent Zhangjiagang City, Zhangjiagang, Peoples R China.
RP Zhai, XJ; Lu, W (通讯作者)，Ctr Dis Control & Prevent Jiangsu Prov, Nanjing, Jiangsu, Peoples R China.
EM maimai9947@163.com; vickyph@163.com; chencheng128@gmail.com;
   2464805541@qq.com; 417997949@qq.com; jwzjgcdc@126.com; 26821932@qq.com;
   jszxj@jscdc.cn; jsjkmck@163.com
FU National Science and Technology Major Project [2013ZX10004-905]
FX This work was funded by National Science and Technology Major Project
   (grant number: 2013ZX10004-905).
CR Behr MA, 1999, LANCET, V353, P444, DOI 10.1016/S0140-6736(98)03406-0
   Bojang AL, 2016, J INFECTION, V72, P332, DOI 10.1016/j.jinf.2015.11.011
   Bunsow E, 2014, J INFECTION, V68, P338, DOI 10.1016/j.jinf.2013.11.012
   Celik C, 2015, TURK J MED SCI, V45, P1329, DOI 10.3906/sag-1407-56
   Fadda G, 1988, J Pak Med Assoc, V38, P187
   Geleta DA, 2015, BMC MICROBIOL, V15, DOI 10.1186/s12866-015-0566-6
   Hanif SNM, 2011, INT J TUBERC LUNG D, V15, P1274, DOI 10.5588/ijtld.11.0394
   Ioannidis P, 2011, J CLIN MICROBIOL, V49, P3068, DOI 10.1128/JCM.00718-11
   Lim T K, 2000, Respirology, V5, P403, DOI 10.1046/j.1440-1843.2000.00284.x
   Luetkemeyer AF, 2016, CLIN INFECT DIS, V62, P1081, DOI 10.1093/cid/ciw035
   Marouane C, 2016, MED MALADIES INFECT, V46, P20, DOI 10.1016/j.medmal.2015.10.012
   Moure R, 2011, J CLIN MICROBIOL, V49, P1137, DOI 10.1128/JCM.01831-10
   Organization, 2013, AUT REAL TIM NUCL AC
   Ozkutuk N, 2014, MIKROBIYOL BUL, V48, P223
   SC L.W., 2012, CHIN J ANTITUBERC, V34
   Sharma K, 2013, INDIAN J MED MICROBI, V31, P370, DOI 10.4103/0255-0857.118896
   Shrestha P, 2015, TUBERC RES TREAT, V2015
   Siddiqi K, 2003, LANCET INFECT DIS, V3, P288, DOI 10.1016/S1473-3099(03)00609-1
   Steingart KR, 2014, COCHRANE DB SYST REV, DOI [10.1002/14651858.CD009593.pub3, 10.1002/14651858.CD009593.pub2]
   Tadesse M, 2016, INT J MYCOBACT, V5, P211, DOI 10.1016/j.ijmyco.2016.03.005
   Ulrich MP, 2006, J APPL MICROBIOL, V100, P1011, DOI 10.1111/j.1365-2672.2006.02810.x
   Walusimbi S, 2013, BMC INFECT DIS, V13, DOI 10.1186/1471-2334-13-507
   WHO, 2014, GLOB TUB REP 2015
   WHO, 2010, WHO RAP IMPL XPERT M
   Yu Wang Yz, 2013, STANDARD OPERATION P
   Zeka AN, 2011, J CLIN MICROBIOL, V49, P4138, DOI 10.1128/JCM.05434-11
NR 26
TC 4
Z9 6
U1 1
U2 4
PU ACADEMIC PRESS LTD- ELSEVIER SCIENCE LTD
PI LONDON
PA 24-28 OVAL RD, LONDON NW1 7DX, ENGLAND
SN 0882-4010
J9 MICROB PATHOGENESIS
JI Microb. Pathog.
PD APR
PY 2017
VL 105
BP 260
EP 263
DI 10.1016/j.micpath.2017.02.040
PG 4
WC Immunology; Microbiology
WE Science Citation Index Expanded (SCI-EXPANDED)
SC Immunology; Microbiology
GA ER2VA
UT WOS:000398650700039
PM 28258004
DA 2022-08-20
ER

PT J
AU Sasikumar, C
   Utpat, K
   Desai, U
   Joshi, J
AF Sasikumar, Chinnu
   Utpat, Ketaki
   Desai, Unnati
   Joshi, Jyotsna
TI The role of genexpert in the diagnosis of mycobacterium tuberculosis
SO EUROPEAN RESPIRATORY JOURNAL
LA English
DT Meeting Abstract
CT International Congress of the European-Respiratory-Society (ERS)
CY SEP 28-OCT 02, 2019
CL Madrid, SPAIN
SP European Respiratory Soc
DE MDR-TB (multidrug-resistant tuberculosis); Treatments; Adherence
C1 [Sasikumar, Chinnu; Utpat, Ketaki; Desai, Unnati; Joshi, Jyotsna] Topiwala Med Coll & BYL Nair Hosp, Mumbai, Maharashtra, India.
EM drchinnusasikumar@gmail.com
NR 0
TC 0
Z9 0
U1 0
U2 0
PU EUROPEAN RESPIRATORY SOC JOURNALS LTD
PI SHEFFIELD
PA 442 GLOSSOP RD, SHEFFIELD S10 2PX, ENGLAND
SN 0903-1936
EI 1399-3003
J9 EUR RESPIR J
JI Eur. Resp. J.
PD SEP 28
PY 2019
VL 54
SU 63
MA PA3003
DI 10.1183/13993003.congress-2019.PA3003
PG 2
WC Respiratory System
WE Science Citation Index Expanded (SCI-EXPANDED); Conference Proceedings Citation Index - Science (CPCI-S)
SC Respiratory System
GA KC7SG
UT WOS:000507372403479
DA 2022-08-20
ER

PT J
AU Popescu, GG
   Moisoiu, A
   Fildan, AP
   Tofolean, DE
   Arghir, IA
   Ion, I
   Arghir, OC
AF Popescu, Gilda Georgeta
   Moisoiu, Adriana
   Fildan, Ariadna Petronela
   Tofolean, Doina Ecaterina
   Arghir, Ioan Anton
   Ion, Ileana
   Arghir, Oana Cristina
TI Genexpert rapid detection of rifampicin resistance among patients with
   pulmonary tuberculosis
SO ROMANIAN BIOTECHNOLOGICAL LETTERS
LA English
DT Article
DE GeneXpert; rifampicin; drug resistance; pulmonary tuberculosis
ID DIAGNOSIS
AB The routine conventional phenotypic bacteriological tests available for pulmonary tuberculosis (PTB) diagnosis, such as microscopy by Ziehl Neelsen staining, and Lowenstein Jensen method of solid culture, requires a long time for revealing positivity, resulting in a delayed diagnosis. After Mycobacterium tuberculosis (MTB) genome was discovered, nucleic acid amplification techniques were developed with more rapid detection and identification of rifampicin resistance in respiratory and extra-pulmonary specimens. GeneXpert is a DNA-polymerase chain reaction technique based on NAA, which allows an accurate genotypic method for a quick diagnosis of PTB diagnosis. The aim of the study was to assess retrospectively the yield of genotypic assay GeneXpert in revealing multidrug resistant TB compare to phenotypic confirmation by solid culture.
   512 patients with positive and negative smears of suspected PTB were investigated by conventional phenotypic assays. PTB diagnosis assessed by positive genotypic assay and confirmed by phenotypic conventional solid culture method was 78.12%. The yield of GeneXpert in revealing rifampicin resistance was high (n=79/512; 15.43%) with 12.5% additional resistance against isoniazid revealed by positive solid cultures and drug susceptibility test. GeneXpert assay is a very useful method for rapid detection of MTB and drug resistance, which facilitates timely diagnosis and appropriate management of pulmonary tuberculosis.
C1 [Popescu, Gilda Georgeta; Moisoiu, Adriana] Marius Nasta Inst Pneumol, 90 Viilor Str, Bucharest 050152, Romania.
   [Popescu, Gilda Georgeta] Titu Maiorescu Univ Med & Pharm, 22 Dambovnicului Tineretului Str, Bucharest 040441, Romania.
   [Fildan, Ariadna Petronela; Tofolean, Doina Ecaterina; Arghir, Ioan Anton; Ion, Ileana; Arghir, Oana Cristina] Ovidius Univ Constanta, Fac Med, 124 Mamaia Blvd, Constanta 900527, Romania.
RP Fildan, AP (通讯作者)，Ovidius Univ Constanta, Fac Med, 124 Mamaia Blvd, Constanta 900527, Romania.
EM ariadnapetrofildan@yahoo.com
CR Agrawal M, 2016, J CLIN DIAGN RES, V10, pDC9, DOI 10.7860/JCDR/2016/18837.7755
   [Anonymous], 2011, AUT REAL TIM NUCL AC
   Arghir OC, 2018, ROM J LEG MED, V26, P183, DOI 10.4323/rjlm.2018.183
   Arghir OC, 2018, FARMACIA, V66, P537, DOI 10.31925/farmacia.2018.3.21
   Bowles EC, 2011, INT J TUBERC LUNG D, V15, P988, DOI 10.5588/ijtld.10.0574
   CIORAN N, 2013, EUR RESPIR J, V42, P4472
   Cojocaru V, 2018, REV CHIM-BUCHAREST, V69, P3688
   EUROPEAN CENTER OF DISEASE PREVENTION AND CONTROL (ECDC), 2018, REP TUB SURV MON EUR
   Gilpin C, 2016, THER ADV INFECT DIS, V3, P145, DOI 10.1177/2049936116673553
   Hillemann D, 2007, J CLIN MICROBIOL, V45, P2635, DOI 10.1128/JCM.00521-07
   Leylabadlo HE, 2016, TUBERC RESPIR DIS, V79, P134, DOI 10.4046/trd.2016.79.3.134
   Munoz-Torrico M, 2016, J BRAS PNEUMOL, V42, P374, DOI 10.1590/S1806-37562016000000226
   Narasimhan P, 2013, PULM MED, V2013, DOI 10.1155/2013/828939
   Nicol MP, 2013, CURR RESPIR MED REV, V9, P187, DOI 10.2174/1573398X113099990015
   Piersimoni C, 2002, J CLIN MICROBIOL, V40, P4138, DOI 10.1128/JCM.40.11.4138-4142.2002
   POP M, 2008, REV MED CHIR SOC MED, V112, P959
   Postolache P, 2017, REV CHIM-BUCHAREST, V68, P2160
   Rasool G, 2019, INT J IMMUNOPATH PH, V33, DOI 10.1177/2058738419827174
   Sia JK, 2019, MICROBIOL SPECTR, V7, DOI 10.1128/microbiolspec.GPP3-0022-2018
   Sloot R, 2014, AM J RESP CRIT CARE, V190, P1044, DOI 10.1164/rccm.201406-1159OC
   Turcu DV, 2019, REV CHIM-BUCHAREST, V70, P1037
   WORLD HEALTH ORGANIZATION, 2019, WHOHTMTB201922
   WORLD HEALTH ORGANIZATION (WHO), REP 2002 GLOB TUB CO
NR 23
TC 1
Z9 1
U1 0
U2 8
PU ARS DOCENDI
PI BUCHAREST
PA SOS PANDURI 90, SECT 5, BUCHAREST, RO-050663, ROMANIA
SN 1224-5984
J9 ROM BIOTECH LETT
JI Rom. Biotech. Lett.
PD JAN-FEB
PY 2021
VL 26
IS 1
BP 2283
EP 2288
DI 10.25083/rbl/26.1/2283.2288
PG 6
WC Biotechnology & Applied Microbiology
WE Science Citation Index Expanded (SCI-EXPANDED)
SC Biotechnology & Applied Microbiology
GA PC0WM
UT WOS:000596730800013
OA gold
DA 2022-08-20
ER

PT J
AU Ramjathan, P
   Reddy, N
   Mlisana, KP
AF Ramjathan, P.
   Reddy, N.
   Mlisana, K. P.
TI Utility of GeneXpert MTB/RIF assay in the diagnosis of extrapulmonary
   tuberculosis
SO JOURNAL OF THE INTERNATIONAL AIDS SOCIETY
LA English
DT Meeting Abstract
C1 [Ramjathan, P.; Mlisana, K. P.] Natl Hlth Lab Serv, Microbiol, Durban, South Africa.
   [Ramjathan, P.; Reddy, N.; Mlisana, K. P.] Univ KwaZulu Natal, Dept Med Microbiol, Durban, South Africa.
EM praksha.ramjathan@gmail.com
CR Hillemann D, 2011, J CLIN MICROBIOL, V49, P1202, DOI 10.1128/JCM.02268-10
NR 1
TC 0
Z9 0
U1 0
U2 1
PU JOHN WILEY & SONS LTD
PI CHICHESTER
PA THE ATRIUM, SOUTHERN GATE, CHICHESTER PO19 8SQ, W SUSSEX, ENGLAND
EI 1758-2652
J9 J INT AIDS SOC
JI J. Int. AIDS Soc.
PD JUL
PY 2016
VL 19
SU 5
MA THPDB0202
PG 2
WC Immunology; Infectious Diseases
WE Science Citation Index Expanded (SCI-EXPANDED)
SC Immunology; Infectious Diseases
GA EM6AD
UT WOS:000395394300321
DA 2022-08-20
ER

PT J
AU Rindi, L
   Ali, G
   Fabiani, B
   Fontanini, G
   Garzelli, C
AF Rindi, Laura
   Ali, Greta
   Fabiani, Barbara
   Fontanini, Gabriella
   Garzelli, Carlo
TI Detection of Mycobacterium tuberculosis from paraffin-embedded tissues
   by GeneXpert MTB/RIF
SO TUBERCULOSIS
LA English
DT Article
ID REAL-TIME PCR; XPERT MTB/RIF; EXTRAPULMONARY TUBERCULOSIS; PULMONARY
   TUBERCULOSIS; DIAGNOSTIC-ACCURACY; ASSAY; COMPLEX; METAANALYSIS;
   RESISTANCE; BONE
AB GeneXpert MTB/RIF (Xpert) assay, a rapid and automated system based on real-time PCR and molecular beacon technology, proved to be a sensitive and specific tool capable of detecting Mycobacterium tuberculosis and rifampin resistance in clinical specimens. In this study we provide a Xpert-dedicated successful protocol for processing paraffin-embedded tissue and assess the feasibility of the Xpert assay-based tuberculosis (TB) diagnosis on these specimens, thus proving the Xpert assay as a valuable TB diagnostic tool in supporting conventional histopathological methods. (C) 2017 Elsevier Ltd. All rights reserved.
C1 [Rindi, Laura; Fabiani, Barbara; Garzelli, Carlo] Univ Pisa, Dept Translat Res & New Technol Med & Surg, I-56127 Pisa, Italy.
   [Ali, Greta] Univ Hosp Pisa, Unit Pathol Anat, I-56126 Pisa, Italy.
   [Fontanini, Gabriella] Univ Pisa, Dept Surg Med & Mol Pathol, I-56126 Pisa, Italy.
   [Fontanini, Gabriella] Univ Pisa, Crit Area, I-56126 Pisa, Italy.
RP Rindi, L (通讯作者)，Univ Pisa, Dept Translat Res & New Technol Med & Surg, I-56127 Pisa, Italy.; Rindi, L (通讯作者)，Dipartimento Ric Traslaz & Nuove Tecnol Med & Chi, Via San Zeno 35-39, I-56127 Pisa, Italy.
EM laura.rindi@med.unipi.it
RI Fontanini, Gabriella/O-7636-2015
OI Fontanini, Gabriella/0000-0003-1957-2052
FU University of Pisa
FX This work was financially supported by the University of Pisa, Grant
   "Fondi di Ateneo, 2014-2015''.
CR Banada PP, 2013, J CLIN MICROBIOL, V51, P2317, DOI 10.1128/JCM.00332-13
   Boehme CC, 2010, NEW ENGL J MED, V363, P1005, DOI 10.1056/NEJMoa0907847
   Chang K, 2012, J INFECTION, V64, P580, DOI 10.1016/j.jinf.2012.02.012
   Denkinger CM, 2014, EUR RESPIR J, V44, P435, DOI 10.1183/09031936.00007814
   Garzelli C, 2012, INFECT GENET EVOL, V12, P610, DOI 10.1016/j.meegid.2011.10.015
   Gu YT, 2015, INT J INFECT DIS, V36, P27, DOI 10.1016/j.ijid.2015.05.014
   Hillemann D, 2006, INT J TUBERC LUNG D, V10, P340
   Lee HS, 2011, J MOL DIAGN, V13, P390, DOI 10.1016/j.jmoldx.2011.02.004
   Luo RF, 2010, J CLIN MICROBIOL, V48, P2569, DOI 10.1128/JCM.02449-09
   Marlowe EM, 2011, J CLIN MICROBIOL, V49, P1621, DOI 10.1128/JCM.02214-10
   Maynard-Smith L, 2014, BMC INFECT DIS, V14, DOI 10.1186/s12879-014-0709-7
   Park JS, 2010, EUR RESPIR J, V35, P851, DOI 10.1183/09031936.00067209
   Scott LE, 2014, J CLIN MICROBIOL, V52, P1818, DOI 10.1128/JCM.03553-13
   Surat G, 2014, J CLIN PATHOL, V67, P1084, DOI 10.1136/jclinpath-2014-202307
   Talaulikar D, 2008, J CLIN PATHOL, V61, P119, DOI 10.1136/jcp.2006.045294
   World Health Organization (WHO), 2015, WHOHTMTB201513
NR 16
TC 8
Z9 12
U1 1
U2 7
PU CHURCHILL LIVINGSTONE
PI EDINBURGH
PA JOURNAL PRODUCTION DEPT, ROBERT STEVENSON HOUSE, 1-3 BAXTERS PLACE,
   LEITH WALK, EDINBURGH EH1 3AF, MIDLOTHIAN, SCOTLAND
SN 1472-9792
J9 TUBERCULOSIS
JI Tuberculosis
PD SEP
PY 2017
VL 106
BP 53
EP 55
DI 10.1016/j.tube.2017.06.005
PG 3
WC Immunology; Microbiology; Respiratory System
WE Science Citation Index Expanded (SCI-EXPANDED)
SC Immunology; Microbiology; Respiratory System
GA FD7XP
UT WOS:000407739700008
PM 28802405
DA 2022-08-20
ER

PT J
AU Moussa, HS
   Bayoumi, FS
   Ali, AM
AF Moussa, Husseiny Sh.
   Bayoumi, Faten S.
   Ali, Ahmed M.
TI Evaluation of GeneXpert MTB/RIF assay for direct diagnosis of pulmonary
   tuberculosis
SO SAUDI MEDICAL JOURNAL
LA English
DT Article
ID XPERT MTB/RIF; MYCOBACTERIUM-TUBERCULOSIS; RIFAMPIN RESISTANCE; RAPID
   DETECTION; CHILDREN; SPECIMENS; MICROSCOPY; ACCURACY; SPUTUM
AB Objectives: To evaluate the performance of GeneXpert MTB/RIF assay for direct diagnosis of pulmonary tuberculosis (PTB).
   Methods: This is a cross-sectional study conducted between October 2013 and February 2016 at Abbassaia Chest Hospital and Ain Shams University Hospital, Cairo, Egypt. Inclusion criteria were adults between 18 and 60 years with suspected PTB and classified into 5 clinical categories based on their clinical, radiological, and laboratory findings: confirmed TB, probable TB, possible TB, unlikely TB, and not TB. Two sputum samples from each participant were analyzed by GX and the results were compared by conventional culture.
   Results: In total, 218 participants were enrolled: 71 had confirmed TB; 112, highly probable TB; 20, probable TB; 10, unlikely TB; and 5, no TB. The sensitivity and specificity of the GX assay were 93% and 98.3% respectively. GeneXpert was positive in 93% of confirmed TB and 2.2% of probable TB cases.
   Conclusions: GeneXpert is a rapid and promising technique with good sensitivity (93%) and specificity (98.3%), but it cannot be used as a standalone PTB diagnostic tool. There is a need for more GX evaluation studies in countries with low TB incidence.
C1 [Moussa, Husseiny Sh.] Ain Shams Univ, Fac Women Art Sci & Educ, Dept Bot, Cairo, Egypt.
   [Bayoumi, Faten S.] Modern Sci & Arts Univ, Fac Pharm, Dept Microbiol, Cairo, Egypt.
   [Ali, Ahmed M.] Univ Dammam, Coll Appl Med Sci, Dept Med Lab Technol, Hafar al Batin, Saudi Arabia.
RP Ali, AM (通讯作者)，Univ Dammam, Coll Appl Med Sci, Dept Med Lab Technol, Hafar al Batin, Saudi Arabia.
EM ahmedelymani22@gmail.com
CR Boehme CC, 2011, LANCET, V377, P1495, DOI 10.1016/S0140-6736(11)60438-8
   Boehme CC, 2010, NEW ENGL J MED, V363, P1005, DOI 10.1056/NEJMoa0907847
   Bunsow E, 2014, J INFECTION, V68, P338, DOI 10.1016/j.jinf.2013.11.012
   Deggim V, 2013, J CLIN MICROBIOL, V51, P2396, DOI 10.1128/JCM.00151-13
   El Din MAT, 2015, EGYPT J CHEST DIS TU, V64, P939, DOI 10.1016/j.ejcdt.2015.03.004
   Graham SM, 2012, J INFECT DIS, V205, pS199, DOI 10.1093/infdis/jis008
   Helb D, 2010, J CLIN MICROBIOL, V48, P229, DOI 10.1128/JCM.01463-09
   Kawai V, 2006, AM J TROP MED HYG, V75, P1027, DOI 10.4269/ajtmh.2006.75.1027
   Kent P. T., 1985, PUBLIC HLTH MYCOBACT
   Kivihya-Ndugga LEA, 2003, INT J TUBERC LUNG D, V7, P1163
   Lawn SD, 2011, PLOS MED, V8
   Marlowe EM, 2011, J CLIN MICROBIOL, V49, P1621, DOI 10.1128/JCM.02214-10
   Moure R, 2011, J CLIN MICROBIOL, V49, P1137, DOI 10.1128/JCM.01831-10
   Nicol MP, 2011, LANCET INFECT DIS, V11, P819, DOI 10.1016/S1473-3099(11)70167-0
   O'Grady J, 2011, CURR OPIN PULM MED, V17, P134, DOI 10.1097/MCP.0b013e3283452346
   Rachow A, 2012, CLIN INFECT DIS, V54, P1388, DOI 10.1093/cid/cis190
   Reither K, 2015, J INFECTION, V70, P392, DOI 10.1016/j.jinf.2014.10.003
   Sekadde MP, 2013, BMC INFECT DIS, V13, DOI 10.1186/1471-2334-13-133
   Steingart KR, 2006, LANCET INFECT DIS, V6, P664, DOI 10.1016/S1473-3099(06)70602-8
   Steingart KR, 2014, COCHRANE DB SYST REV, DOI [10.1002/14651858.CD009593.pub3, 10.1002/14651858.CD009593.pub2]
   SWETS JA, 1982, EVALUATION DIAGNOSTI
   Tortoli E, 2012, EUR RESPIR J, V40, P442, DOI 10.1183/09031936.00176311
   World Health Organization, 2014, WHOHTMTB201408
   Zar HJ, 2012, CLIN INFECT DIS, V55, P1088, DOI 10.1093/cid/cis598
   Zar HJ, 2005, LANCET, V365, P130, DOI 10.1016/S0140-6736(05)17702-2
   Zeka AN, 2011, J CLIN MICROBIOL, V49, P4138, DOI 10.1128/JCM.05434-11
   Zmak L, 2013, INT J MYCOBACT, V2, P179, DOI 10.1016/j.ijmyco.2013.05.003
NR 27
TC 10
Z9 12
U1 0
U2 2
PU SAUDI MED J
PI RIYADH
PA ARMED FORCES HOSPITAL, PO BOX 7897,, RIYADH 11159, SAUDI ARABIA
SN 0379-5284
J9 SAUDI MED J
JI Saudi Med. J.
PD OCT
PY 2016
VL 37
IS 10
BP 1076
EP 1081
DI 10.15537/smj.2016.10.14998
PG 6
WC Medicine, General & Internal
WE Science Citation Index Expanded (SCI-EXPANDED)
SC General & Internal Medicine
GA EC2BC
UT WOS:000387913300004
PM 27652357
OA gold, Green Published, Green Submitted
DA 2022-08-20
ER

PT J
AU Pang, Y
   Shang, YY
   Lu, J
   Liang, Q
   Dong, LL
   Li, YX
   Zhao, LP
   Jiang, GL
   Huang, HR
AF Pang, Yu
   Shang, Yuanyuan
   Lu, Jie
   Liang, Qian
   Dong, Lingling
   Li, Yunxu
   Zhao, Liping
   Jiang, Guanglu
   Huang, Hairong
TI GeneXpert MTB/RIF assay in the diagnosis of urinary tuberculosis from
   urine specimens
SO SCIENTIFIC REPORTS
LA English
DT Article
ID DRUG-RESISTANCE; XPERT MTB/RIF; CHINA; DETERMINANTS; MICROSCOPY; PROFILE
AB Conventional bacteriological methods are not generally helpful in diagnosing urinary tuberculosis (UTB). GeneXpert is endorsed for the detection of pulmonary tuberculosis, whereas the data on its utility for urine specimens is limited. In this study, we aimed to evaluate its performance on urine specimens in a country with high TB incidence. A total of 163 suspected UTB patients were consecutively enrolled in the analysis, including 37 (22.7%) culture-positive and 44 (27.0%) clinically diagnosed UTB cases. Compared with conventional culture, the sensitivity of GeneXpert (94.6%) was significantly higher than that of smear microscopy (40.5%, P < 0.001). When setting clinical diagnosis as gold standard, 51 out of 81 clinically diagnosed UTB cases were detected by GeneXpert, demonstrating a sensitivity of 63.0%, which was significantly higher than that of smear microscopy (18.5%, P < 0.001) and culture (45.7%, P = 0.027), respectively. In addition, the proportion of UTB cases in the migrant population was significantly higher than that in the resident population (P = 0.019). To conclude, our data demonstrate that GeneXpert outperforms AFB smear and culture for the detection of MTB in urine samples, which provides an alternative for the diagnosis of UTB. The migrant population and previously diagnosed TB cases are high risk factors for developing UTB cases.
C1 [Pang, Yu; Shang, Yuanyuan; Liang, Qian; Dong, Lingling; Li, Yunxu; Zhao, Liping; Jiang, Guanglu; Huang, Hairong] Capital Med Univ, Natl Clin Lab TB, Beijing Key Lab Drug Resistant TB Res, Beijing Chest Hosp,Beijing TB & Thorac Tumor Inst, Beijing, Peoples R China.
   [Lu, Jie] Capital Med Univ, Beijing Childrens Hosp, Beijing Pediat Res Inst, Beijing, Peoples R China.
RP Huang, HR (通讯作者)，Capital Med Univ, Natl Clin Lab TB, Beijing Key Lab Drug Resistant TB Res, Beijing Chest Hosp,Beijing TB & Thorac Tumor Inst, Beijing, Peoples R China.
EM huanghairong@tb123.org
FU National Key Project [2008ZX10003015]
FX This work was supported by the National Key Project (2008ZX10003015). We
   thank the local staffs from Beijing Chest Hospital for their hard work
   in data collection.
CR Altintepe L, 2005, RENAL FAILURE, V27, P657, DOI 10.1080/08860220500234857
   Altiparmak MR, 2015, RENAL FAILURE, V37, P1157, DOI 10.3109/0886022X.2015.1057460
   An J, 2016, SCI REP-UK, V6, DOI 10.1038/srep29727
   Bergonzoli G, 2016, REV PANAM SALUD PUBL, V39, P101
   Boehme CC, 2010, NEW ENGL J MED, V363, P1005, DOI 10.1056/NEJMoa0907847
   Caviedes L, 2000, J CLIN MICROBIOL, V38, P1203, DOI 10.1128/JCM.38.3.1203-1208.2000
   Cek M, 2005, EUR UROL, V48, P353, DOI 10.1016/j.eururo.2005.03.008
   da Silva GB, 2016, REV SOC BRAS MED TRO, V49, P386, DOI 10.1590/0037-8682-0310-2015
   Daher ED, 2013, AM J TROP MED HYG, V88, P54, DOI 10.4269/ajtmh.2013.12-0413
   Donald PR, 2009, NEW ENGL J MED, V360, P2393, DOI 10.1056/NEJMp0903806
   Dunlap NE, 2000, AM J RESP CRIT CARE, V161, P1376, DOI 10.1164/ajrccm.161.4.16141
   Kim HY, 2001, RADIOGRAPHICS, V21, P839, DOI 10.1148/radiographics.21.4.g01jl06839
   Lawn SD, 2012, BMC INFECT DIS, V12, DOI 10.1186/1471-2334-12-103
   Lawn SD, 2011, FUTURE MICROBIOL, V6, P1067, DOI [10.2217/fmb.11.84, 10.2217/FMB.11.84]
   Lenk S, 2001, Curr Opin Urol, V11, P93, DOI 10.1097/00042307-200101000-00014
   Liang QF, 2013, INT J TUBERC LUNG D, V17, P655, DOI 10.5588/ijtld.12.0615
   LIPSKY BA, 1984, REV INFECT DIS, V6, P214
   Marlowe EM, 2011, J CLIN MICROBIOL, V49, P1621, DOI 10.1128/JCM.02214-10
   Matos MJ, 2005, EUR J RADIOL, V55, P181, DOI 10.1016/j.ejrad.2005.04.016
   Moussa OM, 2000, J UROLOGY, V164, P584, DOI 10.1016/S0022-5347(05)67427-7
   Pai M, 2015, J INFECT DIS, V211, pS21, DOI 10.1093/infdis/jiu803
   Pan American Health Organization, 2012, TUB REG AM
   Pandie S, 2016, SCI REP-UK, V6, DOI 10.1038/srep32924
   Pang Y, 2014, PEDIATR INFECT DIS J, V33, P1047, DOI 10.1097/INF.0000000000000403
   Peto HM, 2009, CLIN INFECT DIS, V49, P1350, DOI 10.1086/605559
   Sandgren A, 2013, EURO SURVEILL, V18
   Sun YX, 2016, CHINESE MED J-PEKING, V129, P1856, DOI 10.4103/0366-6999.186650
   Theron G, 2014, SCI REP-UK, V4, DOI 10.1038/srep05658
   World Health Organization, 2016, GLOB TUB REP 2016 WH, V2016
   World Health Organization, 2013, AUT REALT NUCL AC AM
   Xia H, 2013, INT J TUBERC LUNG D, V17, P107, DOI 10.5588/ijtld.12.0184
   Ye YX, 2016, MEDICINE, V95, DOI 10.1097/MD.0000000000003537
   Zhao Y, 2016, GUIDELINES DETECTING
NR 33
TC 17
Z9 22
U1 1
U2 2
PU NATURE PUBLISHING GROUP
PI LONDON
PA MACMILLAN BUILDING, 4 CRINAN ST, LONDON N1 9XW, ENGLAND
SN 2045-2322
J9 SCI REP-UK
JI Sci Rep
PD JUL 21
PY 2017
VL 7
AR 6181
DI 10.1038/s41598-017-06517-0
PG 6
WC Multidisciplinary Sciences
WE Science Citation Index Expanded (SCI-EXPANDED)
SC Science & Technology - Other Topics
GA FB6XM
UT WOS:000406285700089
PM 28733605
OA gold, Green Published
DA 2022-08-20
ER

PT J
AU Ozkara, S
   Ceyhan, I
   Guler, M
   Dulkar, G
AF Ozkara, Seref
   Ceyhan, Ismail
   Guler, Mujgan
   Dulkar, Gungor
TI Rapid diagnosis of tuberculosis and rifampin resistance by GeneXpert
   MTB/RIF test
SO EUROPEAN RESPIRATORY JOURNAL
LA English
DT Meeting Abstract
CT 28th International Congress of the European-Respiratory-Society (ERS)
CY SEP 15-19, 2018
CL Paris, FRANCE
SP European Respiratory Soc
C1 [Ozkara, Seref; Ceyhan, Ismail; Guler, Mujgan; Dulkar, Gungor] Ataturk Chest Dis & Chest Surg Educ & Res Hosp, Ankara, Turkey.
NR 0
TC 0
Z9 0
U1 0
U2 0
PU EUROPEAN RESPIRATORY SOC JOURNALS LTD
PI SHEFFIELD
PA 442 GLOSSOP RD, SHEFFIELD S10 2PX, ENGLAND
SN 0903-1936
EI 1399-3003
J9 EUR RESPIR J
JI Eur. Resp. J.
PD SEP 15
PY 2018
VL 52
SU 62
MA PA4758
DI 10.1183/13993003.congress-2018.PA4758
PG 1
WC Respiratory System
WE Science Citation Index Expanded (SCI-EXPANDED); Conference Proceedings Citation Index - Science (CPCI-S)
SC Respiratory System
GA HH2RV
UT WOS:000455567106400
DA 2022-08-20
ER

PT J
AU Yeong, C
   Byrne, A
   Marais, B
   Crighton, T
   Sintchenko, V
AF Yeong, C.
   Byrne, A.
   Marais, B.
   Crighton, T.
   Sintchenko, V
TI PERFORMANCE OF GENEXPERT PCR ON POOLED SPUTUM VERSUS SMEAR MICROSCOPY IN
   TUBERCULOSIS.
SO RESPIROLOGY
LA English
DT Meeting Abstract
C1 [Yeong, C.; Byrne, A.; Marais, B.; Crighton, T.; Sintchenko, V] Western Sydney Local Hlth Dist, Westmead & Blacktown Hosp, Sydney, NSW, Australia.
   [Byrne, A.] Western Sydney Univ, Blacktown Clin Sch, Sydney, NSW, Australia.
   [Byrne, A.; Marais, B.; Sintchenko, V] Natl Hlth & Med Res Council Ctr Res Excellence TB, Sydney, NSW, Australia.
   [Marais, B.] Univ Sydney, Marie Bashir Inst Infect Dis & Biosecur MBI, Sydney, NSW, Australia.
   [Crighton, T.; Sintchenko, V] NSW Hlth Pathol Westmead, NSW Mycobacterium Reference Lab, Sydney, NSW, Australia.
RI Marais, Ben/AAX-2626-2021
NR 0
TC 0
Z9 0
U1 0
U2 0
PU WILEY
PI HOBOKEN
PA 111 RIVER ST, HOBOKEN 07030-5774, NJ USA
SN 1323-7799
EI 1440-1843
J9 RESPIROLOGY
JI Respirology
PD MAR
PY 2019
VL 24
SU 1
SI SI
MA TO 035
BP 39
EP 39
PG 1
WC Respiratory System
WE Science Citation Index Expanded (SCI-EXPANDED)
SC Respiratory System
GA HP1WI
UT WOS:000461458900071
DA 2022-08-20
ER

PT J
AU Reechaipichitkul, W
   Phetsuriyawong, A
   Chaimanee, P
   Ananta, P
AF Reechaipichitkul, Wipa
   Phetsuriyawong, Attawoot
   Chaimanee, Prajuab
   Ananta, Pimjai
TI DIAGNOSTIC TEST OF SPUTUM GENEXPERT MTB/RIF FOR SMEAR NEGATIVE PULMONARY
   TUBERCULOSIS
SO SOUTHEAST ASIAN JOURNAL OF TROPICAL MEDICINE AND PUBLIC HEALTH
LA English
DT Article
DE pulmonary tuberculosis; negative AFB smear; diagnostic test; Gene-Xpert
   MTB/RIF sputum test
ID MOLECULAR DIAGNOSIS; MYCOBACTERIUM-TUBERCULOSIS; ASSAY; RESISTANCE;
   RIFAMPIN
AB The objective of this study was to evaluate the performance of the GeneXpert MTB/RIF sputum test for diagnosing pulmonary tuberculosis (TB) among patients sputum acid-fast bacillus (AFB) smear negative results in Thailand, a country with a high prevalence of pulmonary tuberculosis. We studied 151 patients who presented to Srinagarind Hospital, Khon Kaen, Thailand with a 2 week or more history of fever and/or cough and an abnormal chest radiograph between 2010 and 2014; these patients had at least 2 negative sputum AFB smear results. Of these, 76 were diagnosed as having either confirmed or probable pulmonary TB: the 32 confirmed cases were those with a positive sputum culture for Mycobacterium tuberculosis (MTB) and the 44 probable case were those with clinical and radiographic findings consistent with TB and who had a response to anti-TB therapy. Seventy-five cases were diagnosed as not having pulmonary TB. Of the 32 patients with a positive sputum culture for MTB, 26 had a positive GeneXpert MTB/RIF sputum test. Compared to sputum culture for MTB the GeneXpert MTB/ RIF test gave a sensitivity of 83.9% (95% CI: 66.3-94.5) and a specificity of 92.1% (95% CI: 83.6-97), a positive predictive value (PPV) of 81.3% (95% CI: 63.6-92.8) and a negative predictive value (NPV) of 93.3% (95% CI: 85.1-97.8). The GeneXpert MTB/RIF test had a fair sensitivity and specificity for diagnosing smear negative pulmonary TB. It may be useful for diagnosing pulmonary TB in patients with a negative sputum AFB smear. The assay is faster than culture and can detect rifampicin resistant strains of MTB.
C1 [Reechaipichitkul, Wipa; Phetsuriyawong, Attawoot] Khon Kaen Univ, Srinagarind Hosp, Div Pulm Unit, Dept Med,Fac Med, Khon Kaen 40002, Thailand.
   [Chaimanee, Prajuab; Ananta, Pimjai] Khon Kaen Univ, Srinagarind Hosp, Clin Lab Sect, Khon Kaen 40002, Thailand.
RP Reechaipichitkul, W (通讯作者)，Khon Kaen Univ, Srinagarind Hosp, Div Pulm Unit, Dept Med,Fac Med, Khon Kaen 40002, Thailand.
EM wipree@yahoo.com
FU Faculty of Medicine, Khon Kaen University
FX The authors thank the Faculty of Medicine, Khon Kaen University for
   their support and James A Will, Professor Emeritus, University of
   Wisconsin for assistance with the English language presentation of the
   manuscript.
CR Bhatt MLB, 2012, SOUTH ASIAN J CANCER, V1, P36, DOI 10.4103/2278-330X.96507
   Boehme CC, 2010, NEW ENGL J MED, V363, P1005, DOI 10.1056/NEJMoa0907847
   Brossier F, 2006, J CLIN MICROBIOL, V44, P3659, DOI 10.1128/JCM.01054-06
   Bunsow E, 2014, J INFECTION, V68, P338, DOI 10.1016/j.jinf.2013.11.012
   Chang K, 2012, J INFECTION, V64, P580, DOI 10.1016/j.jinf.2012.02.012
   Colebunders R, 2000, INT J TUBERC LUNG D, V4, P97
   Dunlap NE, 2000, AM J RESP CRIT CARE, V161, P1376, DOI 10.1164/ajrccm.161.4.16141
   HOBBY GL, 1973, ANTIMICROB AGENTS CH, V4, P94, DOI 10.1128/AAC.4.2.94
   Iram S, 2015, PAK J MED SCI, V31, P105, DOI 10.12669/pjms.311.6970
   Lawn SD, 2013, LANCET INFECT DIS, V13, P349, DOI 10.1016/S1473-3099(13)70008-2
   Lin SYG, 2014, CLIN LAB MED, V34, P297, DOI 10.1016/j.cll.2014.02.005
   LIPSKY BA, 1984, REV INFECT DIS, V6, P214
   Nyamande K, 2007, INT J TUBERC LUNG D, V11, P1308
   Siddiqi K, 2003, LANCET INFECT DIS, V3, P288, DOI 10.1016/S1473-3099(03)00609-1
   Soini H, 2001, CLIN CHEM, V47, P809
   Soto A, 2013, TROP MED INT HEALTH, V18, P1222, DOI 10.1111/tmi.12172
   Steingart KR, 2014, COCHRANE DB SYST REV, DOI [10.1002/14651858.CD009593.pub3, 10.1002/14651858.CD009593.pub2]
   Tostmann A, 2008, CLIN INFECT DIS, V47, P1135, DOI 10.1086/591974
   WHO, 2010, TREATMENT OF TUBERCULOSIS: GUIDELINES, FOURTH EDITION, P1
   WHO Guidelines Approved by the Guidelines Review Committee, 2014, XPERT MTB RIF IMPL M
   World Health Organization, 2007, IMPR DIAGN TREATM SM
   World Health Organization, 2014, WHOHTMTB201408
   YEAGER H, 1967, AM REV RESPIR DIS, V95, P998
   Zmak L, 2013, INT J MYCOBACT, V2, P179, DOI 10.1016/j.ijmyco.2013.05.003
NR 24
TC 10
Z9 10
U1 0
U2 7
PU SOUTHEAST ASIAN MINISTERS EDUC ORGANIZATION
PI BANGKOK
PA SEAMEO-TROPMED, 420-6 RAJVITHI RD,, BANGKOK 10400, THAILAND
SN 0125-1562
J9 SE ASIAN J TROP MED
JI Southeast Asian J. Trop. Med. Public Health
PD MAY
PY 2016
VL 47
IS 3
BP 457
EP 466
PG 10
WC Public, Environmental & Occupational Health; Infectious Diseases;
   Tropical Medicine
WE Science Citation Index Expanded (SCI-EXPANDED)
SC Public, Environmental & Occupational Health; Infectious Diseases;
   Tropical Medicine
GA DO8DI
UT WOS:000378012400013
PM 27405129
DA 2022-08-20
ER

PT J
AU Shi, J
   Dong, WZ
   Ma, YF
   Liang, Q
   Shang, YY
   Wang, F
   Huang, HR
   Pang, Y
AF Shi, Jin
   Dong, Wenzhu
   Ma, Yifeng
   Liang, Qian
   Shang, Yuanyuan
   Wang, Fen
   Huang, Hairong
   Pang, Yu
TI GeneXpert MTB/RIF Outperforms Mycobacterial Culture in Detecting
   Mycobacterium tuberculosis from Salivary Sputum
SO BIOMED RESEARCH INTERNATIONAL
LA English
DT Article
ID XPERT MTB/RIF; DIAGNOSIS; ASSAY
AB GeneXpert MTB/RIF (Xpert) assay has been endorsed for the diagnosis of pulmonary TB due to its high sensitivity and specificity for culture positive TB. There is no doubt that Xpert could not be more sensitive than mycobacterial culture, while the positive rate of Xpert among sputum samples was higher than that of mycobacterial culture in our laboratory. We therefore carried out a prospective study to determine a potential explanation for this unexpected result regarding the clinical use of Xpert. Overall, a total of 558 patients meeting inclusion criteria were enrolled in final analysis between August 2017 and September 2017 in Beijing Chest Hospital. The overall positive rate of Xpert among sputum samples was 45.9% (256/558), which was significantly higher than that of liquid culture (33.4%, 184/558; P < 0.01). The percentage of culture negative result in salivary sputum was significantly higher than that in mucoid sputum [odds ratio (OR): 5.04, 95% confidence interval (95% CI): 2.74-9.28; P < 0.01]. In addition, the TB cases having previous treatment history had a higher proportion of culture negative result than new cases (OR: 4.26, 95% CI: 1.61-11.28; P = 0.01). In conclusion, the results of this study demonstrate that Xpert outperforms mycobacterial culture in detecting MTB from salivary sputum. In addition, the previously treated patients are more likely to yield negative culture results. Our data will provide important hints to formulate an appropriate diagnostic algorithm for pulmonary tuberculosis based on the appearance of sputum samples.
C1 [Shi, Jin; Dong, Wenzhu; Ma, Yifeng; Liang, Qian; Shang, Yuanyuan; Wang, Fen; Huang, Hairong; Pang, Yu] Capital Med Univ, Beijing TB & Thorac Tumor Inst, Beijing Key Lab Drug Resistant TB Res, Nat Clin Lab TB,Beijing Chest Hosp, Beijing, Peoples R China.
   [Shi, Jin] Capital Med Univ, MOE Key Lab Major Dis Children,Beijing Pediat Res, Beijing Childrens Hosp,Natl Ctr Childrens Hlth, Beijing Key Lab Pediat Dis Otolaryngol Head & Nec, Beijing 100045, Peoples R China.
   [Dong, Wenzhu] Inner Mongolia Med Univ, Hohhot 010059, Peoples R China.
RP Huang, HR; Pang, Y (通讯作者)，Capital Med Univ, Beijing TB & Thorac Tumor Inst, Beijing Key Lab Drug Resistant TB Res, Nat Clin Lab TB,Beijing Chest Hosp, Beijing, Peoples R China.
EM huanghairong@tb123.org; pangyupound@163.com
FU Beijing Municipal Administration of Hospitals' Youth Programme
   [QML20171601]
FX The authors would like to thank members of the National Clinical
   Laboratory on Tuberculosis at Beijing Chest Hospital, Capital Medical
   University for their technical assistance. This work was supported by
   the Beijing Municipal Administration of Hospitals' Youth Programme
   (QML20171601).
CR Acuna-Villaorduna C, 2017, INT J TUBERC LUNG D, V21, P389, DOI [10.5588/ijUd.16.0785, 10.5588/ijtld.16.0785]
   Cano-Muniz S, 2018, CLIN MICROBIOL REV, V31, DOI 10.1128/CMR.00060-17
   Chen JHK, 2015, EUR J CLIN MICROBIOL, V34, P1827, DOI 10.1007/s10096-015-2419-5
   den Hertog AL, 2009, INT J TUBERC LUNG D, V13, P466
   Marlowe EM, 2011, J CLIN MICROBIOL, V49, P1621, DOI 10.1128/JCM.02214-10
   Nikolayevskyy V, 2015, TUBERCULOSIS, V95, P179, DOI 10.1016/j.tube.2014.11.005
   Pang Y, 2017, SCI REP-UK, V7, DOI 10.1038/s41598-017-06517-0
   Pang Y, 2014, PEDIATR INFECT DIS J, V33, P1047, DOI 10.1097/INF.0000000000000403
   Pang Y, 2013, J CLIN MICROBIOL, V51, P1707, DOI 10.1128/JCM.03436-12
   Pantoja A, 2013, EUR RESPIR J, V42, P708, DOI 10.1183/09031936.00147912
   Tortoli E, 2012, EUR RESPIR J, V40, P442, DOI 10.1183/09031936.00176311
   Wang LX, 2014, LANCET, V383, P2057, DOI 10.1016/S0140-6736(13)62639-2
   Yoon SH, 2012, BMC INFECT DIS, V12, DOI 10.1186/1471-2334-12-172
   Zumla A, 2013, NAT REV DRUG DISCOV, V12, P388, DOI 10.1038/nrd4001
NR 14
TC 16
Z9 16
U1 1
U2 2
PU HINDAWI LTD
PI LONDON
PA ADAM HOUSE, 3RD FLR, 1 FITZROY SQ, LONDON, W1T 5HF, ENGLAND
SN 2314-6133
EI 2314-6141
J9 BIOMED RES INT
JI Biomed Res. Int.
PY 2018
VL 2018
AR 1514381
DI 10.1155/2018/1514381
PG 5
WC Biotechnology & Applied Microbiology; Medicine, Research & Experimental
WE Science Citation Index Expanded (SCI-EXPANDED)
SC Biotechnology & Applied Microbiology; Research & Experimental Medicine
GA GB0YN
UT WOS:000428777200001
PM 29805972
OA Green Published, gold, Green Submitted
DA 2022-08-20
ER

PT J
AU Phetsuriyawong, A
   Reechaipichitkul, W
AF Phetsuriyawong, A.
   Reechaipichitkul, W.
TI DIAGNOSTIC TEST OF SPUTUM GENEXPERT MTB/RIF FOR SMEAR NEGATIVE PULMONARY
   TUBERCULOSIS
SO RESPIROLOGY
LA English
DT Meeting Abstract
C1 [Phetsuriyawong, A.; Reechaipichitkul, W.] Srinagarind Hosp, Med, Khon Kaen, Thailand.
NR 0
TC 0
Z9 0
U1 0
U2 1
PU WILEY-BLACKWELL
PI HOBOKEN
PA 111 RIVER ST, HOBOKEN 07030-5774, NJ USA
SN 1323-7799
EI 1440-1843
J9 RESPIROLOGY
JI Respirology
PD NOV
PY 2016
VL 21
SU 3
SI SI
MA APSR6-0133
BP 94
EP 94
PG 1
WC Respiratory System
WE Science Citation Index Expanded (SCI-EXPANDED)
SC Respiratory System
GA EC0NJ
UT WOS:000387797600279
DA 2022-08-20
ER

PT J
AU Cuong, NK
   Ngoc, NB
   Hoa, NB
   Dat, VQ
   Nhung, NV
AF Cuong, Nguyen Kim
   Ngoc, Nguyen Bao
   Hoa, Nguyen Binh
   Dat, Vu Quoc
   Nhung, Nguyen Viet
TI GeneXpert on patients with human immunodeficiency virus and
   smear-negative pulmonary tuberculosis
SO PLOS ONE
LA English
DT Article
ID XPERT MTB/RIF ASSAY; RAPID MOLECULAR-DETECTION;
   MYCOBACTERIUM-TUBERCULOSIS; RIFAMPIN RESISTANCE; CULTURE-SYSTEM;
   DIAGNOSIS; ACCURACY; PERFORMANCE; MULTICENTER; MUTATION
AB Objectives Vietnam is a high-prevalence country for tuberculosis (TB). Xpert MTB/RIF is a novel PCR-based diagnostic test that is substantially more sensitive for detecting M. tuberculosis than traditional smear-based techniques. However, locally-derived evidence of Xpert MTB/RIF in HIV-infected people is limited. This study evaluates the performance of the Xpert MTB/RIF in HIV-infected patients with smear-negative pulmonary TB (SNTB). Methods This was a cross-sectional study in 3 hospitals. The performance of Xpert MTB/RIF was compared with the reference standard of liquid culture and phenotypic drug-susceptibility testing for rifampicin (RIF) resistance. Results Out of 123 patients, the median age was 37.0 (IQR: 32.0-41.0) and 81.3% were male. The area under the receiver operating characteristic curve, sensitivity (Se) and specificity (Sp) of Xpert MTB/RIF for pulmonary TB diagnosis were 0.72 (95% confidence interval [CI]: 0.63-0.81), 66.7% (95%CI: 54.8-77.1) and 77.1% (95%CI: 62.7-88.0), respectively, while Se and Sp of Xpert MTB/RIF in detecting RIF resistance were 50.0 (11.8-88.2) and 86.4% (95%CI: 72.7-94.8). Conclusion The performance of Xpert MTB/RIF in HIV-infected patients with SNTB for the diagnosis of TB and RIF-resistance was low. Further studies are required to evaluate the results of Xpert MTB/RIF assay in HIV-infected patients with SNTB and the role of Xpert repetition on the same specimens.
C1 [Cuong, Nguyen Kim] Hanoi Med Univ, Dept TB & Lung Dis, Hanoi, Vietnam.
   [Cuong, Nguyen Kim] Natl Lung Hosp, Dept Resp TB, Hanoi, Vietnam.
   [Ngoc, Nguyen Bao] Natl Lung Hosp, Dept Pharm, Hanoi, Vietnam.
   [Hoa, Nguyen Binh; Nhung, Nguyen Viet] Natl TB Programme, Hanoi, Vietnam.
   [Dat, Vu Quoc] Hanoi Med Univ, Dept Infect Dis, Hanoi, Vietnam.
RP Ngoc, NB (通讯作者)，Natl Lung Hosp, Dept Pharm, Hanoi, Vietnam.
EM baongochup@gmail.com
RI Dat, Vu Quoc/L-8899-2017
OI Dat, Vu Quoc/0000-0002-5904-5970; Bao Ngoc, Nguyen/0000-0001-6026-2270
FU VIETNAM ADMINISTRATION OF HIV/AIDS CONTROL [0095]
FX Mr. Cuong got grants from the VIETNAM ADMINISTRATION OF HIV/AIDS CONTROL
   (grant number: 0095, 2013). URL: http://vaac.gov.vn/enus The funders had
   no role in study design, data collection and analysis, decision to
   publish, or preparation of the manuscript.
CR Annabel B., 2019, GLOBAL TUBERCULOSIS
   [Anonymous], 2011, 4921QDBYT MTBRIF 4921QDBYT MTBRIF
   [Anonymous], 2013, XPERT MTBRIF ASS DIA
   Balcells ME, 2012, INT J TUBERC LUNG D, V16, P1349, DOI 10.5588/ijtld.12.0156
   Blakemore R, 2010, J CLIN MICROBIOL, V48, P2495, DOI 10.1128/JCM.00128-10
   Boehme CC, 2010, NEW ENGL J MED, V363, P1005, DOI 10.1056/NEJMoa0907847
   Carriquiry G, 2012, PLOS ONE, V7, DOI 10.1371/journal.pone.0044626
   Chakravorty Soumitesh, 2012, Tuberc Res Treat, V2012, P768603, DOI 10.1155/2012/768603
   Dorman SE, 2018, LANCET INFECT DIS, V18, P76, DOI [10.1016/S1473-3099(17)30691-6, 10.1016/s1473-3099(17)30691-6]
   Geleta DA, 2015, BMC MICROBIOL, V15, DOI 10.1186/s12866-015-0566-6
   Hajian-Tilaki K, 2014, J BIOMED INFORM, V48, P193, DOI 10.1016/j.jbi.2014.02.013
   Helb D, 2010, J CLIN MICROBIOL, V48, P229, DOI 10.1128/JCM.01463-09
   Horne David J, 2019, Cochrane Database Syst Rev, V6, pCD009593, DOI 10.1002/14651858.CD009593.pub4
   Kawkitinarong K, 2017, CLIN INFECT DIS, V64, pS171, DOI 10.1093/cid/cix151
   Lan Nguyen Thi Ngoc, 2000, J PRACTICAL MED, V382, P92
   Lawn SD, 2011, FUTURE MICROBIOL, V6, P1067, DOI [10.2217/fmb.11.84, 10.2217/FMB.11.84]
   Lawn SD, 2011, PLOS MED, V8, DOI 10.1371/journal.pmed.1001067
   Luetkemeyer AF, 2016, CLIN INFECT DIS, V62, P1081, DOI 10.1093/cid/ciw035
   Mathys V, 2014, INT J TUBERC LUNG D, V18, P1255, DOI 10.5588/ijtld.14.0297
   Mokaddas E, 2015, J CLIN MICROBIOL, V53, P1351, DOI 10.1128/JCM.03412-14
   Nicol MP, 2011, LANCET INFECT DIS, V11, P819, DOI 10.1016/S1473-3099(11)70167-0
   RAVIGLIONE MC, 1992, B WORLD HEALTH ORGAN, V70, P515
   Rigouts L, 2013, J CLIN MICROBIOL, V51, P2641, DOI 10.1128/JCM.02741-12
   Scott L, 2017, J CLIN MICROBIOL, V55, P2491, DOI 10.1128/JCM.00289-17
   Sohn H, 2014, CLIN INFECT DIS, V58, P970, DOI 10.1093/cid/ciu022
   Somoskovi A, 2013, J CLIN MICROBIOL, V51, P3127, DOI 10.1128/JCM.01377-13
   Steingart KR, 2014, COCHRANE DB SYST REV, DOI [10.1002/14651858.CD009593.pub3, 10.1002/14651858.CD009593.pub2]
   Theron G, 2014, LANCET, V383, P424, DOI 10.1016/S0140-6736(13)62073-5
   Theron G, 2011, AM J RESP CRIT CARE, V184, P132, DOI 10.1164/rccm.201101-0056OC
   UNAIDS, 2019, GLOB HIV AIDS STAT 2
   WHO, 2016, XPERT MTB RIF ASS DI
   World Health Organization, 2014, COMP HDB WHO GUID PR
   World Health Organization, 2010, GUIDELINES TREATMENT, V4th
   World Health Organization (WHO), 2007, IMPROVING DIAGNOSIS
   Yakrus MA, 2014, J CLIN MICROBIOL, V52, P1932, DOI 10.1128/JCM.00417-14
   Zetola NM, 2014, J CLIN MICROBIOL, V52, P2422, DOI 10.1128/JCM.02489-13
   Zong KC, 2019, BMC MICROBIOL, V19, DOI 10.1186/s12866-019-1516-5
NR 38
TC 0
Z9 0
U1 0
U2 0
PU PUBLIC LIBRARY SCIENCE
PI SAN FRANCISCO
PA 1160 BATTERY STREET, STE 100, SAN FRANCISCO, CA 94111 USA
SN 1932-6203
J9 PLOS ONE
JI PLoS One
PD JUL 6
PY 2021
VL 16
IS 7
AR e0253961
DI 10.1371/journal.pone.0253961
PG 11
WC Multidisciplinary Sciences
WE Science Citation Index Expanded (SCI-EXPANDED)
SC Science & Technology - Other Topics
GA TK6VN
UT WOS:000674293700031
PM 34228759
OA Green Published, gold
DA 2022-08-20
ER

PT J
AU Zhang, Q
   Zhang, Q
   Sun, BQ
   Liu, C
   Su, AN
   Wang, XH
   Liu, N
   Zhang, J
   Kang, J
   Hou, G
AF Zhang, Qin
   Zhang, Qing
   Sun, Bing-qi
   Liu, Chang
   Su, An-na
   Wang, Xiao-han
   Liu, Na
   Zhang, Juan
   Kang, Jian
   Hou, Gang
TI GeneXpert MTB/RIF for rapid diagnosis and rifampin resistance detection
   of endobronchial tuberculosis
SO RESPIROLOGY
LA English
DT Article
DE diagnosis; endobronchial tuberculosis; GeneXpert Mycobacterium
   tuberculosis; rifampin resistance
ID MYCOBACTERIUM-TUBERCULOSIS; PULMONARY TUBERCULOSIS; CLINICAL SPECIMENS;
   XPERT MTB/RIF; ASSAY; EXTRAPULMONARY; PERFORMANCE; EXPERIENCE;
   PREDICTORS; SPUTUM
AB Background and objectiveDelayed diagnosis and treatment of tuberculosis (TB) contribute to poor outcomes, especially for endobronchial TB (EBTB), which typically leads to tracheobronchial stenosis. Finding rapid and accurate diagnostic tools for EBTB is crucial. GeneXpert Mycobacterium tuberculosis (MTB)/rifampin (RIF) was recommended by the World Health Organization (WHO) as a standard molecular biological diagnostic technique for MTB. The aim of this study was to evaluate the efficacy of GeneXpert MTB/RIF for diagnosing EBTB and for evaluating RIF resistance.
   MethodsBiopsy tissue and bronchial brushings from EBTB patients were prospectively assessed with GeneXpert MTB/RIF. The diagnostic yields of auramine O-stained sputum smears and bronchial brush smears were obtained, and the results were compared with the cultures of sputum and biopsy tissues for MTB.
   ResultsIn 61 confirmed cases of EBTB, the sensitivities of sputum smear, bronchial brush smear, sputum culture and tissue culture to diagnose EBTB were 13.1%, 32.8%, 36.1% and 68.9%, respectively. For bronchial brushings and biopsies, our data showed sensitivities of 57.4% and 63.9%, respectively, and a specificity of 100% for GeneXpert MTB/RIF, and these results were superior to those of sputum smears, bronchial brush smears and sputum culture. GeneXpert MTB/RIF for bronchial brushings and biopsies showed complementarity in its diagnostic performance. Resistance to RIF was identified in 17.4% (8/46) of GeneXpert MTB-positive cases.
   ConclusionGeneXpert MTB/RIF may enable more rapid EBTB diagnosis and determination of RIF resistance, which are crucial for timely treatment.
C1 [Zhang, Qin; Kang, Jian; Hou, Gang] China Med Univ, Hosp 1, Inst Resp Dis, 155 Nanjing North St, Shenyang 110001, Liaoning, Peoples R China.
   [Zhang, Qing; Liu, Chang; Su, An-na; Wang, Xiao-han; Liu, Na] Shenyang Thorac Hosp, Dept Endoscopy, Shenyang, Liaoning, Peoples R China.
   [Sun, Bing-qi; Zhang, Juan] Shenyang Thorac Hosp, Dept Lab, Shenyang, Liaoning, Peoples R China.
RP Hou, G (通讯作者)，China Med Univ, Hosp 1, Inst Resp Dis, 155 Nanjing North St, Shenyang 110001, Liaoning, Peoples R China.
EM hougangcmu@163.com
RI Hou, Gang/Q-5067-2018; Hou, Gang/AAA-1844-2021
OI Hou, Gang/0000-0003-3438-1764; 
FU Department of Science and Technology of Liaoning Province in China
   [2014225006]
FX This research was supported by a grant (2014225006) from the Department
   of Science and Technology of Liaoning Province in China.
CR Baker BJ, 2015, CLIN INFECT DIS, V60, P1287, DOI 10.1093/cid/civ006
   Biadglegne F, 2014, TUBERCULOSIS, V94, P502, DOI 10.1016/j.tube.2014.05.002
   Boehme CC, 2010, NEW ENGL J MED, V363, P1005, DOI 10.1056/NEJMoa0907847
   Bunsow E, 2014, J INFECTION, V68, P338, DOI 10.1016/j.jinf.2013.11.012
   Chung H.S., 1991, TUBERC RESPIR DIS, V38, P108, DOI [10.4046/trd.1991.38.2.108, DOI 10.4046/TRD.1991.38.2.108]
   Chung HS, 2000, CHEST, V117, P385, DOI 10.1378/chest.117.2.385
   Dhasmana Devesh J, 2014, Ann Am Thorac Soc, V11, P392, DOI 10.1513/AnnalsATS.201308-250OC
   El-Zammar OA, 2007, HISTOPATHOLOGY, V50, P289, DOI 10.1111/j.1365-2559.2006.02546.x
   Espy MJ, 2006, CLIN MICROBIOL REV, V19, P165, DOI 10.1128/CMR.19.1.165-256.2006
   Hanif F, 2012, JCPSP-J COLL PHYSICI, V22, P298, DOI 05.2012/JCPSP.298301
   Hasan M, 2013, INT J MYCOBACT, V2, P214, DOI 10.1016/j.ijmyco.2013.09.001
   Helb D, 2010, J CLIN MICROBIOL, V48, P229, DOI 10.1128/JCM.01463-09
   Hendry C, 2009, J CLIN MICROBIOL, V47, P1206, DOI 10.1128/JCM.02097-08
   Hillemann D, 2011, J CLIN MICROBIOL, V49, P1202, DOI 10.1128/JCM.02268-10
   Jung SS, 2015, RESPIROLOGY, V20, P488, DOI 10.1111/resp.12474
   Marlowe EM, 2011, J CLIN MICROBIOL, V49, P1621, DOI 10.1128/JCM.02214-10
   Ozkaya S, 2012, MULTIDISCIP RESP MED, V7, DOI 10.1186/2049-6958-7-34
   Pandey S, 2017, PATHOLOGY, V49, P70, DOI 10.1016/j.pathol.2016.10.004
   Pathak V, 2016, J THORAC DIS, V8, P3818, DOI 10.21037/jtd.2016.12.75
   Ritchie SR, 2007, EUR RESPIR J, V30, P501, DOI 10.1183/09031936.00131406
   Sahin F, 2013, J THORAC DIS, V5, P764, DOI 10.3978/j.issn.2072-1439.2013.12.15
   Shahzad T, 2016, J THORAC DIS, V8, P3797, DOI 10.21037/jtd.2016.12.73
   Um SW, 2008, INT J TUBERC LUNG D, V12, P57
   WHO, 2016, XPERT MTB RIF ASS DI
   Xue Q, 2011, EUR J CLIN MICROBIOL, V30, P1039, DOI 10.1007/s10096-011-1205-2
   Yu Wenpin, 1999, Zhonghua Jiehe He Huxi Zazhi, V22, P396
   Zeka AN, 2011, J CLIN MICROBIOL, V49, P4138, DOI 10.1128/JCM.05434-11
   Zignol M, 2006, J INFECT DIS, V194, P479, DOI 10.1086/505877
NR 28
TC 10
Z9 12
U1 0
U2 4
PU WILEY
PI HOBOKEN
PA 111 RIVER ST, HOBOKEN 07030-5774, NJ USA
SN 1323-7799
EI 1440-1843
J9 RESPIROLOGY
JI Respirology
PD OCT
PY 2018
VL 23
IS 10
BP 950
EP 955
DI 10.1111/resp.13316
PG 6
WC Respiratory System
WE Science Citation Index Expanded (SCI-EXPANDED)
SC Respiratory System
GA GU1XB
UT WOS:000445059400014
PM 29691960
DA 2022-08-20
ER

PT J
AU Nash, M
   Ramapuram, J
   Kaiya, R
   Huddart, S
   Pai, M
   Baliga, S
AF Nash, Madlen
   Ramapuram, John
   Kaiya, Ramya
   Huddart, Sophie
   Pai, Madhukar
   Baliga, Shrikala
TI Use of the GeneXpert tuberculosis system for HIV viral load testing in
   India
SO LANCET GLOBAL HEALTH
LA English
DT Letter
ID XPERT HIV-1; ASSAY; QUANTIFICATION
C1 [Nash, Madlen; Huddart, Sophie; Pai, Madhukar] McGill Univ, McGill Int TB Ctr, Dept Microbiol & Immunol, Montreal, PQ, Canada.
   [Ramapuram, John] Kasturba Med Coll & Hosp, Dept Med, Manipal, Karnataka, India.
   [Ramapuram, John; Pai, Madhukar; Baliga, Shrikala] McGill Ctr Infect Dis, Montreal, PQ, Canada.
   [Kaiya, Ramya; Baliga, Shrikala] Kasturba Med Coll & Hosp, Dept Microbiol, Montreal, PQ, Canada.
   [Huddart, Sophie; Pai, Madhukar] Manipal Univ, Mangalore, India.
   [Huddart, Sophie; Pai, Madhukar] McGill Univ, Dept Epidemiol Biostat & Occupat Hlth, Montreal, PQ, Canada.
RP Baliga, S (通讯作者)，McGill Ctr Infect Dis, Montreal, PQ, Canada.; Baliga, S (通讯作者)，Kasturba Med Coll & Hosp, Dept Microbiol, Montreal, PQ, Canada.
EM shrikalab@yahoo.com
RI Pai, Madhukar/AAX-9901-2021; Huddart, Sophie/AAF-8844-2020; PAL,
   MRINAL/ABG-9676-2020
OI Pai, Madhukar/0000-0003-3667-4536; Huddart, Sophie/0000-0001-6425-3371;
   PAL, MRINAL/0000-0002-1032-272X; Ramapuram, John/0000-0002-9441-5746
FU Dr TMA Pai Endowment Chair in Translational Epidemiology &
   Implementation Research held by MP at Manipal University, India;
   Cavazzoni Family Undergraduate Award for Global Health, as part of
   McGill Global Health Scholars program; Canadian Institutes of Health
   Research
FX We declare no competing interests. This project was supported by a Dr
   TMA Pai Endowment Chair in Translational Epidemiology & Implementation
   Research held by MP at Manipal University, India. MN received a
   Cavazzoni Family Undergraduate Award for Global Health, as part of
   McGill Global Health Scholars program. JR holds a Dr TMA Pai Endowment
   Chair in HIV and opportunistic infections at Manipal University. MP
   holds a Canada Research Chair by the Canadian Institutes of Health
   Research. The funding sources were not involved in this project or the
   manuscript. We are grateful to Cepheid India for their engagement and
   support, and for addressing the supply chain issues identified during
   the project.
CR Ceffa S, 2016, J VIROL METHODS, V229, P35, DOI 10.1016/j.jviromet.2015.12.007
   Drain P., 2017, POINT OF CARE VIR LO
   Garrett NJ, 2016, JAIDS-J ACQ IMM DEF, V72, pE45, DOI 10.1097/QAI.0000000000000978
   Gous N, 2016, PLOS ONE, V11, DOI 10.1371/journal.pone.0168244
   Gueudin M, 2016, JAIDS-J ACQ IMM DEF, V72, P521, DOI 10.1097/QAI.0000000000001003
   Isaakidis P, 2015, LANCET HIV, V2, pE414, DOI 10.1016/S2352-3018(15)00180-0
   Jordan JA, 2016, J CLIN VIROL, V80, P27, DOI 10.1016/j.jcv.2016.04.014
   Mor O, 2015, J CLIN MICROBIOL, V53, P3458, DOI 10.1128/JCM.01806-15
   Moyo S, 2016, J CLIN MICROBIOL, V54, P3050, DOI 10.1128/JCM.01594-16
   Pai M, 2017, ELIFE, V6, DOI [10.7554/elife.25956, 10.7554/eLife.25956]
   Roberts T, 2016, CLIN INFECT DIS, V62, P1043, DOI 10.1093/cid/ciw001
   Sidibe M, 2016, J INT AIDS SOC, V19, DOI 10.7448/IAS.19.1.21133
   World Health Organization, 2020, WHO CONSOLIDATED GUI
   World Health Organization, 2017, WHO MON XPERT MTB RI
NR 14
TC 15
Z9 16
U1 0
U2 4
PU ELSEVIER SCI LTD
PI OXFORD
PA THE BOULEVARD, LANGFORD LANE, KIDLINGTON, OXFORD OX5 1GB, OXON, ENGLAND
SN 2214-109X
J9 LANCET GLOB HEALTH
JI Lancet Glob. Health
PD AUG
PY 2017
VL 5
IS 8
BP E754
EP E755
DI 10.1016/S2214-109X(17)30247-4
PG 2
WC Public, Environmental & Occupational Health
WE Science Citation Index Expanded (SCI-EXPANDED); Social Science Citation Index (SSCI)
SC Public, Environmental & Occupational Health
GA FA5NV
UT WOS:000405491100014
PM 28716346
OA gold
DA 2022-08-20
ER

PT J
AU Zhang, Q
   Zhang, Q
   Sun, BQ
   Liu, C
   Su, AN
   Wang, XH
   Liu, N
   Zhang, J
   Kang, J
   Hou, G
AF Zhang, Qin
   Zhang, Qing
   Sun, Bing-Qi
   Liu, Chang
   Su, An-Na
   Wang, Xiao-Han
   Liu, Na
   Zhang, Juan
   Kang, Jian
   Hou, Gang
TI GENEXPERT MTB/RIF FOR RAPID DIAGNOSIS AND RIFAMPIN RESISTANCE DETECTION
   OF ENDOBRONCHIAL TUBERCULOSIS
SO RESPIROLOGY
LA English
DT Meeting Abstract
C1 [Zhang, Qin; Kang, Jian; Hou, Gang] China Med Univ, Hosp 1, Shenyang, Liaoning, Peoples R China.
   [Zhang, Qing; Sun, Bing-Qi; Liu, Chang; Su, An-Na; Wang, Xiao-Han; Liu, Na; Zhang, Juan] Shenyang Thorac Hosp, Shenyang, Liaoning, Peoples R China.
RI Hou, Gang/AAA-1844-2021
NR 0
TC 2
Z9 2
U1 0
U2 1
PU WILEY
PI HOBOKEN
PA 111 RIVER ST, HOBOKEN 07030-5774, NJ USA
SN 1323-7799
EI 1440-1843
J9 RESPIROLOGY
JI Respirology
PD NOV
PY 2018
VL 23
SU 2
MA AO004
BP 6
EP 6
PG 1
WC Respiratory System
WE Science Citation Index Expanded (SCI-EXPANDED)
SC Respiratory System
GA HI1PK
UT WOS:000456217200005
DA 2022-08-20
ER

PT J
AU Adilistya, T
   Waskito, D
AF Adilistya, T.
   Waskito, D.
TI Detection of Mycobacterium tuberculosis in urine by GeneXpert MTB/RIF as
   a useful diagnostic tool in urinary tuberculosis
SO INTERNATIONAL JOURNAL OF INFECTIOUS DISEASES
LA English
DT Meeting Abstract
C1 [Adilistya, T.] Dr Kanujoso Djatiwibowo Publ Hosp, Clin Pathol & Microbiol, Balikpapan, Indonesia.
   [Waskito, D.] Dr Kanujoso Djatiwibowo Publ Hosp, Urol, Balikpapan, Indonesia.
NR 0
TC 0
Z9 0
U1 0
U2 0
PU ELSEVIER SCI LTD
PI OXFORD
PA THE BOULEVARD, LANGFORD LANE, KIDLINGTON, OXFORD OX5 1GB, OXON, ENGLAND
SN 1201-9712
EI 1878-3511
J9 INT J INFECT DIS
JI Int. J. Infect. Dis.
PD DEC
PY 2020
VL 101
SU 1
MA 0407
BP 167
EP 167
DI 10.1016/j.ijid.2020.09.450
PG 1
WC Infectious Diseases
WE Science Citation Index Expanded (SCI-EXPANDED)
SC Infectious Diseases
GA PY6EB
UT WOS:000612135100375
OA gold
DA 2022-08-20
ER

PT J
AU Mechal, Y
   Benaissa, E
   El Mrimar, N
   Benlahlou, Y
   Bssaibis, F
   Zegmout, A
   Chadli, M
   Malik, YS
   Touil, N
   Abid, A
   Maleb, A
   Elouennass, M
AF Mechal, Youness
   Benaissa, Elmostafa
   El Mrimar, Nadia
   Benlahlou, Yassine
   Bssaibis, Fatna
   Zegmout, Adil
   Chadli, Mariama
   Malik, Yashpal S.
   Touil, Nadia
   Abid, Ahmed
   Maleb, Adil
   Elouennass, Mostafa
TI Evaluation of GeneXpert MTB/RIF system performances in the diagnosis of
   extrapulmonary tuberculosis
SO BMC INFECTIOUS DISEASES
LA English
DT Article
DE Tuberculosis; Extra-pulmonary tuberculosis; Multidrug-resistance;
   Molecular diagnostic techniques; Morocco
ID MYCOBACTERIUM-TUBERCULOSIS; XPERT MTB/RIF; DRUG-RESISTANCE; ASSAY;
   PULMONARY; COMPLEX
AB Background: Tuberculosis represents a serious public health problem and a significant diagnostic and therapeutic challenge worldwide. Molecular diagnostic techniques are crucial in the World Health Organization's new tuberculosis control strategy. This study aims to evaluate the performance of GeneXpert MTB/RIF (Cepheid Sunnyvale, CA, United States) in diagnosis of extra-pulmonary tuberculosis then compare it's performance in detecting Rifampicin resistance to GenoType MTBDRplus (HAIN Life Sciences, Nehren, Germany).
   Methods: Samples from pulmonary and/or extra-pulmonary origins were analysed in a 21 months retrospective study. Samples were sent to the bacteriology laboratory for Mycobacterium tuberculosis detection using conventional bacteriological and molecular methods (GeneXpert MTB/RIF and MTBDRplus). Sensitivity and specificity were calculated for the stained smear and GeneXpert according to culture (Gold Standard) as well as for GeneXpert MTB/RIF in both negative and positive microscopy tuberculosis cases. Data's statistical analysis was performed with SPSS13.0 software.
   Results: Seven hundred fourteen patients' samples were analysed; the average age was 47.21 +/- 19.98 years with a male predominance (66.4%). Out of 714 samples: 285 were from pulmonary and 429 were from extra-pulmonary origins. The positivity rates for microscopy, GeneXpert MTB/RIF and culture were 12.88, 20.59 and 15.82%, respectively. These rates were 18.9, 23.85 and 20.35% for pulmonary samples and 9.71, 18.41 and 12.82% for extra-pulmonary samples, respectively. The sensitivity and specificity of GeneXpert MTB/RIF were almost the same in both pulmonary and extra-pulmonary samples (78.2 and 90.4%) and (79,3 and 90.3%) respectively. Rifampicin resistance rate found by GeneXpert MTB/RIF was 0.84%. Comparison of Rifampicin resistance obtained by GeneXpert MTB/RIF and Genotype MTBDRplus, showed 100% agreement between the two techniques for studied samples.
   Conclusions: This confirms GeneXpert MTB/RIF advantage for tuberculosis diagnosis, particularly extra-pulmonary tuberculosis with negatively stained smear. The performance of GeneXpert and Genotype MTBDRplus are similar in detection of Rifampicin resistance. However, variability of detection performance according to tuberculosis endemicity deserves more attention in the choice of screening techniques of Rifampicin resistance, hence the interest of conducting comparative studies of detection performance under low and medium endemicity on large samples of tuberculosis populations.
C1 [Mechal, Youness; Benaissa, Elmostafa; El Mrimar, Nadia; Benlahlou, Yassine; Elouennass, Mostafa] Univ Mohammed 5, Epidemiol & Bacterial Resistance Res Team, BIOINOVA Ctr, Fac Med & Pharm, Rabat, Morocco.
   [Mechal, Youness; Benaissa, Elmostafa; El Mrimar, Nadia; Benlahlou, Yassine; Bssaibis, Fatna; Chadli, Mariama; Elouennass, Mostafa] Univ Mohammed 5, Dept Bacteriol, Mohammed V Mil Teaching Hosp, Fac Med & Pharm, Rabat, Morocco.
   [Zegmout, Adil; Abid, Ahmed] Univ Mohammed 5, Pneumol Dept, Mohammed V Univ Hosp, Fac Med & Pharm, Rabat, Morocco.
   [Malik, Yashpal S.] Indian Vet Res Inst IVRI, Bareilly, Uttar Pradesh, India.
   [Touil, Nadia] Univ Mohammed 5, Fac Med & Pharm, Res & Biosafety Lab, Mohammed V Mil Teaching Hosp, Rabat, Morocco.
   [Maleb, Adil] Univ Mohammed, Lab Microbiol, Mohammed VI Univ Hosp, Fac Med & Pharm, Oujda, Morocco.
RP Mechal, Y (通讯作者)，Univ Mohammed 5, Epidemiol & Bacterial Resistance Res Team, BIOINOVA Ctr, Fac Med & Pharm, Rabat, Morocco.; Mechal, Y (通讯作者)，Univ Mohammed 5, Dept Bacteriol, Mohammed V Mil Teaching Hosp, Fac Med & Pharm, Rabat, Morocco.
EM youness.mechal@um5s.net.ma
CR [Anonymous], 2017, ORG MOND SANT RAPP L
   [Anonymous], 2012, CGXMTBRIF503010976
   [Anonymous], 2014, DEF CADR NOT TUB REV
   Bennani K, B EPIDEMIOLOGIE SANT, V50, P19
   Blakemore R, 2010, J CLIN MICROBIOL, V48, P2495, DOI 10.1128/JCM.00128-10
   Boehme CC, 2010, NEW ENGL J MED, V363, P1005, DOI 10.1056/NEJMoa0907847
   Chakravorty S, 2017, MBIO, V8, DOI [10.1128/mBio.00812-17, 10.1128/mbio.00812-17]
   Chiang TY, 2018, PLOS ONE, V13, DOI 10.1371/journal.pone.0200755
   ElBaghdadi J, 1997, INT J TUBERC LUNG D, V1, P309
   Guillet-Caruba C, 2014, REV MED INTERNE, V35, P794, DOI 10.1016/j.revmed.2014.05.001
   HAIN LifeScience, 2015, IFU304A06 HAIN LIFES
   Iram S, 2015, PAK J MED SCI, V31, P105, DOI 10.12669/pjms.311.6970
   Karimi H, 2018, J GLOB ANTIMICROB RE, V12, P63, DOI 10.1016/j.jgar.2017.09.002
   Koser CU, 2012, ANTIMICROB AGENTS CH, V56, P6080, DOI 10.1128/AAC.01641-12
   Lee JY, 2015, TUBERC RESPIR DIS, V78, P47, DOI 10.4046/trd.2015.78.2.47
   Li X, 2017, PLOS ONE, V12, DOI 10.1371/journal.pone.0180217
   Loiez-Durocher C, 2000, ANN BIOL CLIN-PARIS, V58, P291
   Matabane MMZ, 2015, BMC INFECT DIS, V15, DOI 10.1186/s12879-015-1229-9
   Opota O, 2019, J CLIN MICROBIOL, V57, DOI 10.1128/JCM.01717-18
   Ozkutuk N, 2014, MIKROBIYOL BUL, V48, P223
   Parrish NM, 2011, J CLIN MICROBIOL, V49, P772, DOI 10.1128/JCM.02451-10
   Purohit M, 2015, J CLIN DIAGN RES, V9, pEE1, DOI 10.7860/JCDR/2015/12422.5792
   Rahman A, 2016, PLOS ONE, V11, DOI 10.1371/journal.pone.0152694
   Rice JP, 2017, PLOS ONE, V12, DOI 10.1371/journal.pone.0186139
   Rufai SB, 2014, J CLIN MICROBIOL, V52, P1846, DOI 10.1128/JCM.03005-13
   Rusch-Gerdes S, 2006, J CLIN MICROBIOL, V44, P688, DOI 10.1128/JCM.44.3.688-692.2006
   Steingart KR, 2014, COCHRANE DB SYST REV, DOI [10.1002/14651858.CD009593.pub3, 10.1002/14651858.CD009593.pub2]
   Tang TY, 2017, J INT MED RES, V45, P816, DOI 10.1177/0300060517698618
   World Health Organization, 2021, TUBERCULOSIS
   World Health Organization, 2017, TUB PROF MOR
   World Health Organization, 2013, AUT REALT NUCL AC AM
   Zetola NM, 2014, J CLIN MICROBIOL, V52, P2422, DOI 10.1128/JCM.02489-13
NR 32
TC 15
Z9 17
U1 0
U2 2
PU BMC
PI LONDON
PA CAMPUS, 4 CRINAN ST, LONDON N1 9XW, ENGLAND
EI 1471-2334
J9 BMC INFECT DIS
JI BMC Infect. Dis.
PD DEC 19
PY 2019
VL 19
IS 1
AR 1069
DI 10.1186/s12879-019-4687-7
PG 8
WC Infectious Diseases
WE Science Citation Index Expanded (SCI-EXPANDED)
SC Infectious Diseases
GA KI2EL
UT WOS:000511160000006
PM 31856744
OA Green Published, gold
DA 2022-08-20
ER

PT J
AU Hillemann, D
   Rusch-Gerdes, S
   Boehme, C
   Richter, E
AF Hillemann, Doris
   Ruesch-Gerdes, Sabine
   Boehme, Catharina
   Richter, Elvira
TI Rapid Molecular Detection of Extrapulmonary Tuberculosis by the
   Automated GeneXpert MTB/RIF System
SO JOURNAL OF CLINICAL MICROBIOLOGY
LA English
DT Article
ID POLYMERASE-CHAIN-REACTION; MYCOBACTERIUM-TUBERCULOSIS; RIFAMPIN
   RESISTANCE; RPOB GENE; DIAGNOSIS; ASSAY; PCR; TECHNOLOGY
AB In total, 521 nonrespiratory specimens (91 urine, 30 gastric aspirate, 245 tissue, 113 pleural fluid, 19 cerebrospinal fluid [CSF], and 23 stool specimens) submitted to the German National Reference Laboratory for Mycobacteria (NRL) from May 2009 to August 2010 were comparatively investigated with the new molecular-based GeneXpert MTB/RIF (Xpert) assay system and conventional liquid and solid culture methods. Twenty (3.8%) of the 521 specimens gave no interpretable result. Whereas the sensitivity of the Xpert assay with tissue specimens was 69.0% (20 out of 29 culture-positive cases detected), 100% sensitivity was found with the urine and stool specimens. The combined sensitivity and specificity of the Xpert assay were calculated to be 77.3% and 98.2%, respectively.
C1 [Hillemann, Doris; Ruesch-Gerdes, Sabine; Richter, Elvira] Forschungszentrum Borstel, Natl Referenzzentrum Mykobakterien, D-23845 Borstel, Germany.
   [Boehme, Catharina] FIND, Geneva, Switzerland.
RP Hillemann, D (通讯作者)，Forschungszentrum Borstel, Natl Referenzzentrum Mykobakterien, Pk Allee 18, D-23845 Borstel, Germany.
EM dhillemann@fz-borstel.de
RI Trajman, Anete/C-7679-2016
OI Trajman, Anete/0000-0002-4000-4984
CR Boehme CC, 2010, NEW ENGL J MED, V363, P1005, DOI 10.1056/NEJMoa0907847
   Cheng VCC, 2004, J CLIN PATHOL, V57, P281, DOI 10.1136/jcp.2003.012658
   *DTSCH I NORM, 1986, 589433 DIN
   *DTSCH I NORM, 1995, 5894332 DIN
   Dye C, 2006, LANCET, V367, P938, DOI 10.1016/S0140-6736(06)68384-0
   El-Hajj HH, 2001, J CLIN MICROBIOL, V39, P4131, DOI 10.1128/JCM.39.11.4131-4137.2001
   Ellner JJ, 2009, CTS-CLIN TRANSL SCI, V2, P80, DOI 10.1111/j.1752-8062.2008.00086.x
   Greco S, 2009, J CLIN MICROBIOL, V47, P569, DOI 10.1128/JCM.02051-08
   Hasaneen NA, 2003, CHEST, V124, P2105, DOI 10.1378/chest.124.6.2105
   Helb D, 2010, J CLIN MICROBIOL, V48, P229, DOI 10.1128/JCM.01463-09
   Hillemann D, 2007, J CLIN MICROBIOL, V45, P2635, DOI 10.1128/JCM.00521-07
   Hofman V, 2003, ANN PATHOL, V23, P206
   Ling DI, 2008, PLOS ONE, V3, DOI 10.1371/journal.pone.0001536
   Ma X, 2006, J CLIN MICROBIOL, V44, P3409, DOI 10.1128/JCM.00515-06
   Raja S, 2005, CLIN CHEM, V51, P882, DOI 10.1373/clinchem.2004.046474
   Richter E, 2003, J CLIN MICROBIOL, V41, P2672, DOI 10.1128/JCM.41.6.2672-2675.2003
   Richter E, 2006, J CLIN MICROBIOL, V44, P1769, DOI 10.1128/JCM.44.5.1769-1775.2006
   Taniguchi H, 1996, FEMS MICROBIOL LETT, V144, P103, DOI 10.1111/j.1574-6968.1996.tb08515.x
   Telenti A, 1997, J CLIN MICROBIOL, V35, P719, DOI 10.1128/JCM.35.3.719-723.1997
NR 19
TC 247
Z9 260
U1 1
U2 39
PU AMER SOC MICROBIOLOGY
PI WASHINGTON
PA 1752 N ST NW, WASHINGTON, DC 20036-2904 USA
SN 0095-1137
J9 J CLIN MICROBIOL
JI J. Clin. Microbiol.
PD APR
PY 2011
VL 49
IS 4
BP 1202
EP 1205
DI 10.1128/JCM.02268-10
PG 4
WC Microbiology
WE Science Citation Index Expanded (SCI-EXPANDED)
SC Microbiology
GA 744FP
UT WOS:000289080600003
PM 21270230
OA Green Published
DA 2022-08-20
ER

PT J
AU Chou, H
AF Chou, H.
TI AN EVALUATION OF RAPID MOLECULAR TUBERCULOSIS IDENTIFICATION WITH THE
   AUTOMATED GENEXPERT MTB/RIF SYSTEM
SO VALUE IN HEALTH
LA English
DT Meeting Abstract
C1 [Chou, H.] Chi Mei Med Ctr, Tainan, Taiwan.
NR 0
TC 0
Z9 0
U1 0
U2 0
PU ELSEVIER SCIENCE INC
PI NEW YORK
PA STE 800, 230 PARK AVE, NEW YORK, NY 10169 USA
SN 1098-3015
EI 1524-4733
J9 VALUE HEALTH
JI Value Health
PD SEP
PY 2018
VL 21
SU 2
MA PMD29
BP S72
EP S72
DI 10.1016/j.jval.2018.07.543
PG 1
WC Economics; Health Care Sciences & Services; Health Policy & Services
WE Science Citation Index Expanded (SCI-EXPANDED); Social Science Citation Index (SSCI)
SC Business & Economics; Health Care Sciences & Services
GA HL4MZ
UT WOS:000458697200397
OA Bronze
DA 2022-08-20
ER

PT J
AU Sah, SK
   Bhattarai, PR
   Shrestha, A
   Dhami, D
   Guruwacharya, D
   Shrestha, R
AF Sah, Shiv Kumar
   Bhattarai, Pramod Raj
   Shrestha, Anjana
   Dhami, Deepak
   Guruwacharya, Deepa
   Shrestha, Renu
TI Rifampicin-resistant Mycobacterium tuberculosis by GeneXpert MTB/RIF and
   Associated Factors Among Presumptive Pulmonary Tuberculosis Patients in
   Nepal
SO INFECTION AND DRUG RESISTANCE
LA English
DT Article
DE MTB prevalence; RR-MTB prevalence; risk factors; Nepal
ID DRUG-RESISTANCE; MULTIDRUG-RESISTANT; PREVALENCE; CHILDREN; DIAGNOSIS;
   ASSAY
AB Background: Mycobacterium tuberculosis(MTB) remains a major public health problem worldwide, and emergence of drug-resistant TB has become a significant obstacle to effective TB control. However, the rate of MTB and rifampicin resistant-MTB (RR-MTB) in the Nepalese setting has not been studied extensively. Therefore, the present study aims to assess the rate of MTB and RR-MTB and further determine the factors associated with it.
   Methods: A retrospective cross-sectional study, among national representative data of 990 consecutive presumptive TB resister of patients subjected to the GeneXpert test that presented to the tuberculosis referral hospital, was conducted over a one year period from February 2018 to January 2019. Significance for the difference for categorical data was performed by Chi-square test and factors associated with MTB and RR-MTB were assessed using binary logistic regression yielding OR with 95%CI.
   Results: Of total 990 presumptive tuberculosis analyzed cases, median ages of the patients were 39 +/- 19.09 years and two-thirds of the patients were male 653 (66.0%). The estimated prevalence of MTB in presumptive TB patients was 13.8% (95%CI: 11.88%-16.16%), and risk for MTB was significantly associated with previously treated patients: OR: 10.4 (P<0.001). The estimated prevalence of RR-MTB in MTB confirmed patients was 10.2% (4.97%-15.1%). Our study confirmed no association of RR-TB with age, sex, ethnicity, geographical diversity and previous history of treatment failure (P>0.05).
   Conclusion: The overall prevalence of MTB and RR-MTB was high in Nepalese study population, and that being previously treated with anti-TB drug remained significant predictors for MTB; proactive measures are urgently needed to address the challenge of prompt diagnosis, early management and improved monitoring of treatment to limit the emergence drug-resistant MTB strains in the community.
C1 [Sah, Shiv Kumar] Purbanchal Univ, Little Buddha Coll Hlth Sci, Kathmandu, Nepal.
   [Bhattarai, Pramod Raj] Natl TB Control Ctr, Bhaktapur, Nepal.
   [Shrestha, Anjana; Dhami, Deepak; Guruwacharya, Deepa; Shrestha, Renu] Purbanchal Univ, Asian Coll Adv Studies, Satdobato, Lalitpur, Nepal.
RP Sah, SK (通讯作者)，Purbanchal Univ, Little Buddha Coll Hlth Sci, Kathmandu, Nepal.
EM phrshiv@gmail.com
OI Sah, Shiv Kumar/0000-0002-8284-5925
CR Adejumo OA, 2018, AFR HEALTH SCI, V18, P472, DOI 10.4314/ahs.v18i3.2
   Arega B, 2019, BMC INFECT DIS, V19, DOI 10.1186/s12879-019-3943-1
   Banda HT, 1998, T ROY SOC TROP MED H, V92, P161, DOI 10.1016/S0035-9203(98)90727-1
   Baqui AH, 2002, BRIT MED J, V325, P1059, DOI 10.1136/bmj.325.7372.1059
   Berhe G, 2013, BMC INFECT DIS, V13, DOI 10.1186/1471-2334-13-448
   Blakemore R, 2010, J CLIN MICROBIOL, V48, P2495, DOI 10.1128/JCM.00128-10
   Boehme CC, 2010, NEW ENGL J MED, V363, P1005, DOI 10.1056/NEJMoa0907847
   Chang K, 2012, J INFECTION, V64, P580, DOI 10.1016/j.jinf.2012.02.012
   Deribew A, 2011, PLOS ONE, V6, DOI 10.1371/journal.pone.0018614
   Espinal MA, 2001, INT J TUBERC LUNG D, V5, P887
   Gautam PB, 2018, INT J COMMUNITY MED, V5, P2271
   Geleta DA, 2015, BMC MICROBIOL, V15, DOI 10.1186/s12866-015-0566-6
   Getahun M, 2015, BMC PUBLIC HEALTH, V15, DOI 10.1186/s12889-015-2105-7
   Gupta A, 2011, J HEALTH POPUL NUTR, V29, P583
   Hamusse SD, 2016, BMC PUBLIC HEALTH, V16, DOI 10.1186/s12889-016-3210-y
   Hordofa MW, 2015, CLIN MED RES, V4, P75, DOI [DOI 10.11648/J.CMR.20150403.13, 10.11648/j. cmr.20150403.13]
   Jaleta KN, 2017, INFECT DRUG RESIST, V10, P185, DOI 10.2147/IDR.S135935
   Lawn SD, 2011, FUTURE MICROBIOL, V6, P1067, DOI [10.2217/fmb.11.84, 10.2217/FMB.11.84]
   Lockman S, 2001, CLIN INFECT DIS, V32, P373, DOI 10.1086/318489
   Makamure B, 2013, PLOS ONE, V8, DOI 10.1371/journal.pone.0055872
   Mulisa G, 2015, INT J INFECT DIS, V39, P57, DOI 10.1016/j.ijid.2015.08.013
   Mulu Wondemagegn, 2017, BMC Res Notes, V10, P8, DOI 10.1186/s13104-016-2328-4
   Nicol MP, 2011, LANCET INFECT DIS, V11, P819, DOI 10.1016/S1473-3099(11)70167-0
   Nigus D, 2014, J MYCOBAC DIS, V4, P2161, DOI [10.4172/2161-1068.1000152, DOI 10.4172/2161-1068.1000152]
   Nwadioha S. I., 2014, British Microbiology Research Journal, V4, P988, DOI 10.9734/BMRJ/2014/9084
   SAHA K, 1989, EUR J CLIN NUTR, V43, P117
   Sanchez-Perez HJ, 2001, INT J EPIDEMIOL, V30, P386, DOI 10.1093/ije/30.2.386
   Sekadde MP, 2013, BMC INFECT DIS, V13, DOI 10.1186/1471-2334-13-133
   SETHI S, 2013, BMC INFECT DIS, V13, DOI DOI 10.1186/1471-2334-13-13737
   Tessema B, 2012, INT J TUBERC LUNG D, V16, P805, DOI 10.5588/ijtld.11.0522
   Tessema B, 2013, BMC INFECT DIS, V13, DOI 10.1186/1471-2334-13-131
   Toungoussova OS, 2002, INT J TUBERC LUNG D, V6, P406
   Workalemahu Bereket, 2013, BMC Res Notes, V6, P352, DOI 10.1186/1756-0500-6-352
   Yang Y, 2014, INT J INFECT DIS, V22, P83, DOI 10.1016/j.ijid.2013.12.015
   Yohanes A, 2012, AFR HEALTH SCI, V12, P325, DOI 10.4314/ahs.v12i3.12
   Zhou P, 2020, NATURE, V579, P270, DOI 10.1038/s41586-020-2012-7
NR 36
TC 3
Z9 3
U1 0
U2 1
PU DOVE MEDICAL PRESS LTD
PI ALBANY
PA PO BOX 300-008, ALBANY, AUCKLAND 0752, NEW ZEALAND
SN 1178-6973
J9 INFECT DRUG RESIST
JI Infect. Drug Resistance
PY 2020
VL 13
BP 2911
EP 2919
DI 10.2147/IDR.S263795
PG 9
WC Infectious Diseases; Pharmacology & Pharmacy
WE Science Citation Index Expanded (SCI-EXPANDED)
SC Infectious Diseases; Pharmacology & Pharmacy
GA NE1YH
UT WOS:000562393700002
PM 32903905
OA Green Published
DA 2022-08-20
ER

PT J
AU Sanchez-Cabral, O
   Santillan-Diaz, C
   Flores-Bello, AP
   Herrera-Ortega, MI
   Sandoval-Gutierrez, JL
   Santillan-Doherty, P
   Martinez-Mendoza, D
AF Sanchez-Cabral, Olivia
   Santillan-Diaz, Cira
   Paul Flores-Bello, Angel
   Ivannia Herrera-Ortega, Mildred
   Luis Sandoval-Gutierrez, Jose
   Santillan-Doherty, Patricio
   Martinez-Mendoza, Dina
TI GeneXpert (R) MTB/RIF assay with transbronchial lung cryobiopsy for
   Mycobacterium tuberculosis diagnosis
SO ANNALS OF TRANSLATIONAL MEDICINE
LA English
DT Article
DE Transbronchial lung cryobiopsy; GeneXpert MTB/RIF; Mycobacterium
   tuberculosis (MTB)
ID BRONCHOALVEOLAR LAVAGE SAMPLES; PERIPHERAL PULMONARY-LESIONS; XPERT
   MTB/RIF; ENDOBRONCHIAL ULTRASOUND; MICROSCOPY; INFECTION; DISEASE;
   BIOPSY
AB Background: Early tuberculosis (TB) diagnostic is one of the critical steps to TB control. GeneXpert MTB/RIF has been widely proven for a prompt TB diagnosis. The use of GeneXpert MTB/RIF assay with transbronchial lung cryobiopsy samples may increase diagnostic accuracy. We aim to assess the diagnostic of TB with GeneXpert MTB/RIF assay with transbronchial lung cryobiopsy.
   Methods: Patients with suspected diagnosis of TB and negative smear microscopies, with TB culture and GeneXpert MTB/RIF assay with transbronchial lung cryobiopsy were included in this cross-sectional study. Participants were enrolled from 2016 to 2018 at National Institute of Respiratory Diseases, Mexico.
   Results: We included 54 patients (77.8% males) aged 30 to 65 years. The sensitivity of the GeneXpert MTB/RIF assay with transbronchial lung cryobiopsy was 81.3% (95% CI, 62.1-100%), with a specificity of 100% (95% CI, 100-100%) and a negative predictive value of 92.7% (95% CI, 84.7-100%). Twenty-two patients of the total population have HIV, the sensitivity of the test in these patients was 87.5% (95% CI, 64.6-100%). Also, 28 patients with a peripheral localized lesion which had a solid pattern were identified (51.9%). The sensitivity in patients with peripheral localized lesions was 88.9% (68.4-100%).
   Conclusions: The GeneXpert MTB/RIF assay with transbronchial lung cryobiopsy test is as efficient as broncho alveolar lavage for TB diagnosis. Transbronchial lung cryobiopsy increases a major diagnostic opportunity when the nature of illness is malignant. Transbronchial lung cryobiopsy is efficient in HIV patients, especially in patients with peripheral localized lesion.
C1 [Sanchez-Cabral, Olivia; Santillan-Diaz, Cira; Ivannia Herrera-Ortega, Mildred] Natl Inst Resp Dis Ismael Cosio Villegas, Intervent Pulmonol Unit, Mexico City, DF, Mexico.
   [Paul Flores-Bello, Angel] Natl Inst Resp Dis Ismael Cosio Villegas, Clin TB & Pleural Dis, Mexico City, DF, Mexico.
   [Luis Sandoval-Gutierrez, Jose] Natl Inst Resp Dis Ismael Cosio Villegas, Auxiliary & Diagnost Serv, Mexico City, DF, Mexico.
   [Santillan-Doherty, Patricio] Natl Inst Resp Dis Ismael Cosio Villegas, Med Direct, Mexico City, DF, Mexico.
   [Martinez-Mendoza, Dina] Natl Inst Resp Dis Ismael Cosio Villegas, Epidemiol Surveillance Unit, Calzada Tlalpan 4502,Secc 16, Mexico City 14080, DF, Mexico.
RP Martinez-Mendoza, D (通讯作者)，Natl Inst Resp Dis Ismael Cosio Villegas, Epidemiol Surveillance Unit, Calzada Tlalpan 4502,Secc 16, Mexico City 14080, DF, Mexico.
EM dinamarty@gmail.com
CR Akkerman OW, 2013, J CLIN MICROBIOL, V51, P3505, DOI 10.1128/JCM.00843-13
   Ali MS, 2017, RESPIROLOGY, V22, P443, DOI 10.1111/resp.12980
   Armand S, 2011, J CLIN MICROBIOL, V49, P1772, DOI 10.1128/JCM.02157-10
   Barisione E, 2019, PANMINERVA MED, V61, P290, DOI 10.23736/S0031-0808.18.03567-X
   Chen Alexander, 2014, Ann Am Thorac Soc, V11, P578, DOI 10.1513/AnnalsATS.201311-384OC
   Davis JL, 2013, LANCET INFECT DIS, V13, P147, DOI 10.1016/S1473-3099(12)70232-3
   Dhasmana Devesh J, 2014, Ann Am Thorac Soc, V11, P392, DOI 10.1513/AnnalsATS.201308-250OC
   Dhooria S, 2019, LUNG INDIA, V36, P48, DOI 10.4103/lungindia.lungindia_75_18
   Ganeswrie R, 2004, Malays J Pathol, V26, P99
   Han Y, 2018, PLOS ONE, V13, DOI 10.1371/journal.pone.0191590
   Iftikhar IH, 2017, ANN AM THORAC SOC, V14, P1197, DOI 10.1513/AnnalsATS.201701-086SR
   Iqbal M, 2019, J PAK MED ASSOC, V69, P244
   Jacomelli M, 2016, J BRAS PNEUMOL, V42, P248, DOI [10.1590/s1806-37562015000000079, 10.1590/S1806-37562015000000079]
   Jafari C, 2013, INT J TUBERC LUNG D, V17, P1459, DOI 10.5588/ijtld.13.0108
   Johannson KA, 2016, ANN AM THORAC SOC, V13, P1828, DOI 10.1513/AnnalsATS.201606-461SR
   Lu YJ, 2018, INT J INFECT DIS, V71, P14, DOI 10.1016/j.ijid.2018.01.030
   Luca G, 2019, LANCET GLOB HEALTH, V7, P1
   Organizacion Mundial de la Salud, INF MUN TUB 2017
   Phyu MH, 2018, PUBLIC HEALTH ACTION, V8, P181, DOI 10.5588/pha.18.0056
   Raghu G, 2018, AM J RESP CRIT CARE, V198, pE44, DOI 10.1164/rccm.201807-1255ST
   Rakotoarivelo R, 2018, INT J INFECT DIS, V69, P20, DOI 10.1016/j.ijid.2018.01.017
   Ravaglia C, 2019, BMC PULM MED, V19, DOI 10.1186/s12890-019-0780-3
   Ridzon R, 2018, INT J TUBERC LUNG D, V22, P237, DOI 10.5588/ijtld.17.0865
   Sanchez-Cabral O, 2018, HIV AIDS-RES PALLIAT, V10, P115, DOI 10.2147/HIV.S161899
   Sanchez-Cabral O, 2017, RESPIRATION, V94, P285, DOI 10.1159/000478786
   Sanchez-Cabral O, 2017, RESPIRATION, V93, P424, DOI 10.1159/000465527
   Steingart KR, 2007, EXPERT REV ANTI-INFE, V5, P327, DOI 10.1586/14787210.5.3.327
   Steingart KR, 2014, COCHRANE DB SYST REV, DOI [10.1002/14651858.CD009593.pub3, 10.1002/14651858.CD009593.pub2]
   Theron G, 2011, AM J RESP CRIT CARE, V184, P132, DOI 10.1164/rccm.201101-0056OC
   To KW, 2018, J INFECTION, V77, P296, DOI 10.1016/j.jinf.2018.06.011
   UNAIDS, UNAIDS DAT 2018
   Walters E, 2014, PEDIATR PULM, V49, P1133, DOI 10.1002/ppul.22970
   WHO, GLOB TUB REP 2014
   World Health Organization, GLOB TUB REP 2018
   Zawedde-Muyanja S, 2018, INT J TUBERC LUNG D, V22, P1475, DOI 10.5588/ijtld.17.0460
NR 35
TC 5
Z9 5
U1 0
U2 3
PU AME PUBL CO
PI SHATIN
PA FLAT-RM C 16F, KINGS WING PLAZA 1, NO 3 KWAN ST, SHATIN, HONG KONG
   00000, PEOPLES R CHINA
SN 2305-5839
EI 2305-5847
J9 ANN TRANSL MED
JI ANN. TRANSL. MED.
PD MAR
PY 2020
VL 8
IS 6
AR 351
DI 10.21037/atm.2020.02.100
PG 11
WC Oncology; Medicine, Research & Experimental
WE Science Citation Index Expanded (SCI-EXPANDED)
SC Oncology; Research & Experimental Medicine
GA KY7WZ
UT WOS:000522784900094
PM 32355795
OA gold, Green Published
DA 2022-08-20
ER

PT J
AU Vella, V
   Broda, A
   Drobniewski, F
AF Vella, Venanzio
   Broda, Agnieszka
   Drobniewski, Francis
TI Should all suspected tuberculosis cases in high income countries be
   tested with GeneXpert?
SO TUBERCULOSIS
LA English
DT Article
DE Multi-drug resistant tuberculosis; Sensitivity; Specificity; QALYs;
   Cost-effectiveness
AB In countries with a low incidence of multidrug-resistant tuberculosis (MDR-TB), universal testing with GeneXpert might not be always cost-effective. This study provides hospital managers in low MDR-TB incidence countries with criteria on when decentralised universal GeneXpert testing would make sense. The alternatives taken into consideration include: universal microbiological culture and drug susceptibility testing (DST) only (comparator); as above but with concurrent centralized GeneXpert in a referral laboratory vs a decentralized GeneXpert system in every hospital to test smear-positive cases only; as above but testing all samples with GeneXpert regardless of smear status. The parameters were from the national TB statistics for England and from a systematic review. Decentralised GeneXpert to test any suspected TB case was the most cost-effective option when 6% or more TB patients belonged to the high-risk group, defined as previous TB diagnosis and or being born in countries with a high MDR-TB incidence. Hospital managers in England and other low MDR-TB incidence countries could use these findings to decide when to invest in GeneXpert or other molecular diagnostics with similar performance criteria for TB diagnostics.
C1 [Vella, Venanzio; Broda, Agnieszka; Drobniewski, Francis] Imperial Coll London, Dept Infect Dis & Immun, London, England.
RP Drobniewski, F (通讯作者)，Imperial Coll London, Dept Infect Dis & Immun, London, England.
EM v.vella@imperial.ac.uk; a.broda@imperial.ac.uk;
   f.drobniewski@imperial.ac.uk
FU HSR grant Single tube Point-Of-Care multi-drug resistant tuberculosis
   test Project [101552/28560-210131]; Innovate UK
FX Innovate UK and HSR grant Single tube Point-Of-Care multi-drug resistant
   tuberculosis test Project No: 101552/28560-210131.
CR [Anonymous], 2015, TUB ENGL 2015 REP PR
   [Anonymous], 2011, AUT REAL TIM NUCL AC
   [Anonymous], 2015, PSSRU UN COSTS HLTH
   Cairns KA, 2016, J ANTIMICROB CHEMOTH
   Choi HW, 2013, INT J TUBERC LUNG D, V17, P1328, DOI 10.5588/ijtld.13.0095
   Drobniewski F, 2015, HLTH TECHNOL ASSESS, V19
   Gandhi NR, 2010, LANCET, V375, P1830, DOI 10.1016/S0140-6736(10)60410-2
   Marlowe EM, 2011, J CLIN MICROBIOL, V49, P1621, DOI 10.1128/JCM.02214-10
   Mironova S, 2012, EUR J CLIN MICROBIOL, V31, P1381, DOI 10.1007/s10096-011-1453-1
   Omerod LP, 2005, BR MED B, V73-74, P17
   Ryen L, 2015, HEALTH ECON, V24, P1289, DOI 10.1002/hec.3085
   Stephen D Lawn, 2011, FUTURE MICROBIOL, V6, P1067, DOI [10.2217/fmb.11.84, DOI 10.2217/FMB.11.84]
   Vassall A, 2011, PLOS MED, V8, DOI 10.1371/journal.pmed.1001120
   World Health Organization, 2011, GUID PROGR MAN DRUG, P1
   World Health Organization, 2008, POL STAT
   World Health Organization, 2010, ROADM ROLL XP MTB RI
   Wu SS, 2016, AM J THER, V23, pE521, DOI 10.1097/01.mjt.0000433951.09030.5a
NR 17
TC 2
Z9 2
U1 0
U2 3
PU CHURCHILL LIVINGSTONE
PI EDINBURGH
PA JOURNAL PRODUCTION DEPT, ROBERT STEVENSON HOUSE, 1-3 BAXTERS PLACE,
   LEITH WALK, EDINBURGH EH1 3AF, MIDLOTHIAN, SCOTLAND
SN 1472-9792
J9 TUBERCULOSIS
JI Tuberculosis
PD MAY
PY 2018
VL 110
BP 112
EP 120
DI 10.1016/j.tube.2017.10.006
PG 9
WC Immunology; Microbiology; Respiratory System
WE Science Citation Index Expanded (SCI-EXPANDED)
SC Immunology; Microbiology; Respiratory System
GA GG3IK
UT WOS:000432585300018
PM 29779766
OA Green Accepted
DA 2022-08-20
ER

PT J
AU Tang, TY
   Liu, F
   Lu, XL
   Huang, QD
AF Tang, Tingyu
   Liu, Fang
   Lu, Xiaoling
   Huang, Qingdong
TI Evaluation of GeneXpert MTB/RIF for detecting Mycobacterium tuberculosis
   in a hospital in China
SO JOURNAL OF INTERNATIONAL MEDICAL RESEARCH
LA English
DT Article
DE Tuberculosis; GeneXpert MTB; RIF; China
ID PULMONARY TUBERCULOSIS; RIFAMPIN RESISTANCE; DIAGNOSIS; SPECIMENS;
   CULTURE; ASSAY
AB Objective To evaluate the performance of GeneXpert MTB/RIF in diagnosing pulmonary tuberculosis (TB) in China.
   Methods This cross-sectional study included sputum specimens of 240 suspected TB cases. Specimens were examined by light microscopy for the presence of acid-fast bacilli, which were cultured by the BACTEC MGIT 960 (M960) system and detected by the GeneXpert MTB/RIF assay. The positive rate, sensitivity, specificity, positive predictive value (PPV), negative predictive value (NPV), and average turnaround time of methods were evaluated.
   Results The positive rate was 36.6% (87/238) for the GeneXpert MTB/RIF assay and 34.0% (81/238) by M960 culture, with no significant difference between methods ((2)=0.33, p>0.05). According to culture results, sensitivity of the GeneXpert MTB/RIF assay was 84.0% (68/81), specificity was 87.8% (129/147), the PPV was 78.2% (68/87), and the NPV was 87.2% (129/148). The agreement for results between Gene Xpert MTB/RIF and the M960 system was 82.8% and the Kappa value was 0.73.
   Conclusion The GeneXpert MTB/RIF assay is a simple, rapid, and accurate test for detecting Mycobacterium tuberculosis in sputum specimens.
C1 [Tang, Tingyu; Liu, Fang; Lu, Xiaoling; Huang, Qingdong] Zhejiang Hosp, Dept Resp Med, Hangzhou, Zhejiang, Peoples R China.
RP Huang, QD (通讯作者)，Zhejiang Hosp, Hangzhou, Zhejiang, Peoples R China.
EM zjyyhqd1@163.com
CR Anonymous, 2009, Morbidity and Mortality Weekly Report, V58, P7
   Bajrami R, 2016, J INFECT DEV COUNTR, V10, P418, DOI 10.3855/jidc.7569
   Blakemore R, 2010, J CLIN MICROBIOL, V48, P2495, DOI 10.1128/JCM.00128-10
   Bodmer T, 2012, JOVE-J VIS EXP, DOI 10.3791/3547
   Boehme CC, 2011, LANCET, V377, P1495, DOI 10.1016/S0140-6736(11)60438-8
   Bojang AL, 2016, J INFECTION, V72, P332, DOI 10.1016/j.jinf.2015.11.011
   Bunsow E, 2014, J INFECTION, V68, P338, DOI 10.1016/j.jinf.2013.11.012
   Dunlap NE, 2000, AM J RESP CRIT CARE, V161, P1376, DOI 10.1164/ajrccm.161.4.16141
   Gullans CR, 1992, CLIN MICROBIOLOGY PR
   Heidebrecht CL, 2016, SCI REP-UK, V6, DOI 10.1038/srep19391
   Helb D, 2010, J CLIN MICROBIOL, V48, P229, DOI 10.1128/JCM.01463-09
   Song YY, 2014, CHIN J ANTITUBERC, V36, P764
   World Health Organization, WHOHTMTB201522
   Xia H, 2013, J PRACTICAL MED, V29, P3799
   Zeka AN, 2011, J CLIN MICROBIOL, V49, P4138, DOI 10.1128/JCM.05434-11
   Zhao P, 2016, J INT MED RES, V44, P1055, DOI 10.1177/0300060516655243
NR 16
TC 16
Z9 21
U1 0
U2 6
PU SAGE PUBLICATIONS LTD
PI LONDON
PA 1 OLIVERS YARD, 55 CITY ROAD, LONDON EC1Y 1SP, ENGLAND
SN 0300-0605
EI 1473-2300
J9 J INT MED RES
JI J. Int. Med. Res.
PD APR
PY 2017
VL 45
IS 2
BP 816
EP 822
DI 10.1177/0300060517698618
PG 7
WC Medicine, Research & Experimental; Pharmacology & Pharmacy
WE Science Citation Index Expanded (SCI-EXPANDED)
SC Research & Experimental Medicine; Pharmacology & Pharmacy
GA ES7TL
UT WOS:000399753900041
PM 28351283
OA gold, Green Published
DA 2022-08-20
ER

PT J
AU Saeed, M
AF Saeed, M.
TI GeneXpert: A new tool for the rapid detection of rifampicin resistance
   in mycobacterium tuberculosis
SO INTERNATIONAL JOURNAL OF INFECTIOUS DISEASES
LA English
DT Meeting Abstract
C1 [Saeed, M.] Govt Coll Univ Faisalabad, Microbiol, Faisalabad, Pakistan.
OI Saeed, Muhammad/0000-0001-8602-0827
NR 0
TC 0
Z9 0
U1 0
U2 0
PU ELSEVIER SCI LTD
PI OXFORD
PA THE BOULEVARD, LANGFORD LANE, KIDLINGTON, OXFORD OX5 1GB, OXON, ENGLAND
SN 1201-9712
EI 1878-3511
J9 INT J INFECT DIS
JI Int. J. Infect. Dis.
PD DEC
PY 2020
VL 101
SU 1
MA 0460
BP 188
EP 188
DI 10.1016/j.ijid.2020.09.504
PG 1
WC Infectious Diseases
WE Science Citation Index Expanded (SCI-EXPANDED)
SC Infectious Diseases
GA PY6EB
UT WOS:000612135100423
OA gold
DA 2022-08-20
ER

PT J
AU Ruan, JZ
   Wang, ZT
   Xu, SF
AF Ruan, Junzhong
   Wang, Zitong
   Xu, Shaofa
TI Application of GeneXpert MTB/RIF assay in the diagnosis of
   bacteriologically-negative pulmonary tuberculosis
SO INTERNATIONAL JOURNAL OF CLINICAL AND EXPERIMENTAL MEDICINE
LA English
DT Article
DE Bacteriologically-negative pulmonary tuberculosis; mycobacterium
   tuberculosis; GeneXpert MTB/RIF; rifampicin resistance
ID MYCOBACTERIUM-TUBERCULOSIS; CONTROL UNIT; SPECIMENS; COMPLEX
AB Objective: We aimed to investigate the diagnostic performance of GeneXpert MTB/RIF assay in patients with bacteriologically-negative pulmonary tuberculosis (TB). Methods: A total of 125 suspected TB patients who underwent surgery in Beijing Chest Hospital were selected for the study and divided into the TB group (n=83, including 57 patients with bacteriologically-negative pulmonary TB) and the non-TB group (n=42) according to their clinical diagnosis results. The Ziehl-Neelsen staining, mycobacterium TB gene amplification test (TB-DNA), and GeneXpert MTB/RIF assay were performed on formalin-fixed paraffin-embedded (FFPE) tissue samples of the patients post-operatively. The sensitivity, specificity, positive predictive value (PPV), and negative predictive value (NPV) of these methods for the detection of mycobacterium TB (MTB) were evaluated. Results: The sensitivities of the GeneXpert MTB/RIF, TB-DNA, and acid-fast smear (AFS) tests to detect MTB in patients with pulmonary TB were 71.1%, 81.9%, and 43.4%, respectively, and the specificities were 100%, 97.6%, and 97.6%, respectively. The sensitivities of the GeneXpert MTB/RIF, TB-DNA, and AFS testing methods in detecting MTB in patients with bacteriologically-negative pulmonary TB were 61.4%, 75.44%, and 35.09%, respectively, and the specificities were 61.4%, 75.5%, and 35.1%, respectively. In the detection of resistance to rifampicin in patients with bacteriologically-negative pulmonary TB, the sensitivity and specificity of Gene-Xpert MTB/RIF were 83.33% and 94.87%, respectively. Conclusion: GeneXpert MTB/RIF assay can effectively detect MTB and rifampicin resistance in patients with bacteriologically-negative pulmonary TB, demonstrating good diagnostic value for the early identification of bacteriologically-negative pulmonary TB.
C1 [Ruan, Junzhong; Wang, Zitong; Xu, Shaofa] Capital Med Univ, Beijing Chest Hosp, Dept Thorac Surg, 9 Beiguan St, Beijing 101149, Peoples R China.
RP Xu, SF (通讯作者)，Capital Med Univ, Beijing Chest Hosp, Dept Thorac Surg, 9 Beiguan St, Beijing 101149, Peoples R China.
EM xushaofaui76@163.com
CR Alelign A, 2019, PLOS ONE, V14, DOI 10.1371/journal.pone.0216437
   Ankrah AO, 2018, SEMIN NUCL MED, V48, P108, DOI 10.1053/j.semnuclmed.2017.10.005
   Chee CBE, 2000, INT J TUBERC LUNG D, V4, P496
   Chen J, J CLIN HEMATOL BLOOD, V31, P67
   Cole ST, 1998, NATURE, V393, P537, DOI 10.1038/31159
   Garg RK, 2013, EXPERT REV ANTI-INFE, V11, P605, DOI [10.1586/ERI.13.39, 10.1586/eri.13.39]
   Gu Y, 2019, ANN TRANSL MED, V7, DOI 10.21037/atm.2019.09.37
   Hoyt KJ, 2019, PLOS ONE, V14, DOI 10.1371/journal.pone.0214011
   Huang TS, 2003, DIAGN MICR INFEC DIS, V46, P29, DOI 10.1016/S0732-8893(02)00571-0
   Jahan H, 2016, J TUBERCULOSIS RES, V4, P55, DOI [10.4236/jtr.2016.41007, DOI 10.4236/JTR.2016.41007]
   Kerick M, 2011, BMC MED GENOMICS, V4, DOI 10.1186/1755-8794-4-68
   Lu Shui-hua, 2006, Zhonghua Jiehe He Huxi Zazhi, V29, P832
   Ma AJ, 2018, BIOMED ENVIRON SCI, V31, P351, DOI 10.3967/bes2018.046
   Murray CJL, 2018, LANCET INFECT DIS, V18, P261, DOI 10.1016/S1473-3099(17)30703-X
   Natori Y, 2019, TRANSPLANTATION, V103, P210, DOI 10.1097/TP.0000000000002340
   Pang Y, 2017, SCI REP-UK, V7, DOI 10.1038/s41598-017-06517-0
   Pek WY, 2002, ANN ACAD MED SINGAP, V31, P92
   Rasool G, 2019, INT J IMMUNOPATH PH, V33, DOI 10.1177/2058738419827174
   Rufai SB, 2017, J INFECTION, V75, P125, DOI 10.1016/j.jinf.2017.04.010
   Seidler A, 2004, OCCUP ENVIRON MED, V61, P96, DOI 10.1136/oem.2003.008573
   Shrestha Prakash, 2018, Open Microbiol J, V12, P9, DOI 10.2174/1874285801812010009
   Sirous M, 2018, INFECT DRUG RESIST, V11, P1819, DOI 10.2147/IDR.S178831
   Somily AM, 2016, SAUDI MED J, V37, P1404, DOI 10.15537/smj.2016.12.15506
   Torrea G, 2019, SCI REP-UK, V9, DOI 10.1038/s41598-019-48401-z
   von Both U, 2018, SCI REP-UK, V8, DOI 10.1038/s41598-017-18528-y
   Zhang PY, 2001, CHIN J TUBERE RESP D, V2
   Zumla A, 2015, LANCET GLOB HEALTH, V3, pE10, DOI 10.1016/S2214-109X(14)70361-4
NR 28
TC 0
Z9 0
U1 0
U2 2
PU E-CENTURY PUBLISHING CORP
PI MADISON
PA 40 WHITE OAKS LN, MADISON, WI 53711 USA
SN 1940-5901
J9 INT J CLIN EXP MED
JI Int. J. Clin. Exp. Med.
PY 2020
VL 13
IS 10
BP 7766
EP 7772
PG 7
WC Medicine, Research & Experimental
WE Science Citation Index Expanded (SCI-EXPANDED)
SC Research & Experimental Medicine
GA OL2QD
UT WOS:000585185700070
DA 2022-08-20
ER

PT J
AU Herraez, O
   Asencio-Egea, MA
   Huertas-Vaquero, M
   Carranza-Gonzalez, R
   Castellanos-Monedero, J
   Franco-Huerta, M
   Barbera-Farre, JR
   Tenias, JM
AF Herraez, Oscar
   Angeles Asencio-Egea, Maria
   Huertas-Vaquero, Maria
   Carranza-Gonzalez, Rafael
   Castellanos-Monedero, Jesus
   Franco-Huerta, Maria
   Ramon Barbera-Farre, Jose
   Tenias, Jose M.
TI Cost-effectiveness study of the microbiological diagnosis of
   tuberculosis using geneXpert MTB/RIF (R)
SO ENFERMEDADES INFECCIOSAS Y MICROBIOLOGIA CLINICA
LA Spanish
DT Article
DE Tuberculosis; Diagnosis; Real-time polymerase chain reaction;
   Sensitivity and specificity; Cost-effectiveness analysis
ID RESISTANCE; ASSAY
AB Introduction/Objective: To perform a cost-effectiveness analysis of a molecular biology technique for the diagnosis of tuberculosis compared to the classical diagnostic alternative.
   Methods: A cost-effectiveness analysis was performed to evaluate the theoretical implementation of a molecular biology method including two alternative techniques for early detection of Mycobacterium tuberculosis Complex, and resistance to rifampicin (alternative 1: one determination in selected patients; alternative 2: two determinations in all the patients). Both alternatives were compared with the usual procedure for microbiological diagnosis of tuberculosis (staining and microbiological culture), and was accomplished on 1,972 patients in the period in 2008-2012. The effectiveness was measured in QALYs, and the uncertainty was assessed by univariate, multivariate and probabilistic analysis of sensitivity.
   Results: A value of (sic)8,588/QALYs was obtained by the usual method. Total expenditure with the alternative 1 was (sic)8,487/QALYs, whereas with alternative 2, the cost-effectiveness ratio amounted to (sic)2,960/QALYs. Greater diagnostic efficiency was observed by applying the alternative 2, reaching a 75% reduction in the number of days that a patient with tuberculosis remains without an adequate treatment, and a 70% reduction in the number of days that a patient without tuberculosis remains in hospital.
   Conclusion: The implementation of a molecular microbiological technique in the diagnosis of tuberculosis is extremely cost-effective compared to the usual method. Its introduction into the routine diagnostic procedure could lead to an improvement in quality care for patients, given that it would avoid both unnecessary hospitalisations and treatments, and reflected in economic savings to the hospital. (C) 2016 Elsevier Espana, S.L.U. and Sociedad Espanola de Enfermedades Infecciosas y Microbiologia Clinica. All rights reserved.
C1 [Herraez, Oscar] Hosp Gen La Mancha Ctr, Lab Anal Clin, Ciudad Real, Spain.
   [Angeles Asencio-Egea, Maria; Huertas-Vaquero, Maria; Carranza-Gonzalez, Rafael] Hosp Gen La Mancha Ctr, Lab Microbiol, Ciudad Real, Spain.
   [Castellanos-Monedero, Jesus; Franco-Huerta, Maria; Ramon Barbera-Farre, Jose] Hosp Gen La Mancha Ctr, Serv Med Interna, Ciudad Real, Spain.
   [Tenias, Jose M.] Hosp Gen La Mancha Ctr, Unidad Apoyo Invest, Ciudad Real, Spain.
RP Asencio-Egea, MA (通讯作者)，Hosp Gen La Mancha Ctr, Lab Microbiol, Ciudad Real, Spain.
EM marian_asencio@yahoo.es
RI Tenias, Jose Maria/I-8755-2019
OI Tenias, Jose Maria/0000-0002-8079-8491
CR [Anonymous], 2011, AUT REAL TIM NUCL AC
   Armand S, 2011, J CLIN MICROBIOL, V49, P1772, DOI 10.1128/JCM.02157-10
   Caminero JA, 2010, MED CLIN-BARCELONA, V134, P173, DOI 10.1016/j.medcli.2008.12.024
   Catanzaro A, 2000, JAMA-J AM MED ASSOC, V283, P639, DOI 10.1001/jama.283.5.639
   Chang K, 2012, J INFECTION, V64, P580, DOI 10.1016/j.jinf.2012.02.012
   Davies PDO, 2008, INT J TUBERC LUNG D, V12, P1226
   Dorman SE, 2012, PLOS ONE, V7, DOI 10.1371/journal.pone.0043307
   Drummond M, 2015, METHODS EC EVALUATIO
   [el Tratamiento y la Prevention de la Tuberculosis Guia de Practice Clinica sobre el Diagnostic], 2009, GUIAS PRACT CLIN SNS
   European Centre for Disease Prevention and Control, 2013, ERLNTB EXP OP US RAP
   Gonzalez-Martin J, 2010, ENFERM INFEC MICR CL, V28, P297, DOI 10.1016/j.eimc.2010.02.006
   Holland DP, 2009, AM J RESP CRIT CARE, V179, P1055, DOI 10.1164/rccm.200901-0153OC
   Hughes R, 2012, RESP MED, V106, P300, DOI 10.1016/j.rmed.2011.10.005
   Khan K, 2002, NEW ENGL J MED, V347, P1850, DOI 10.1056/NEJMsa021099
   Kind P, 1999, 172 EQ D5
   Lawn SD, 2011, PLOS MED, V8, DOI 10.1371/journal.pmed.1001067
   Menzies NA, 2012, PLOS MED, V9, DOI 10.1371/journal.pmed.1001347
   Moreira J, 2009, MED DECIS MAKING, V29, P380, DOI 10.1177/0272989X08327330
   Rodriguez E., 2012, Boletin Epidemiologico Semanal, V20, P26
   Roos BR, 1998, INT J TUBERC LUNG D, V2, P235
   Steingart KR, 2014, COCHRANE DB SYST REV, DOI [10.1002/14651858.CD009593.pub3, 10.1002/14651858.CD009593.pub2]
   Tan MC, 2008, VALUE HEALTH, V11, P842, DOI 10.1111/j.1524-4733.2008.00334.x
   Vassall A, 2011, PLOS MED, V8, DOI 10.1371/journal.pmed.1001120
NR 23
TC 5
Z9 5
U1 0
U2 2
PU EDICIONES DOYMA S A
PI BARCELONA
PA TRAV DE GRACIA 17-21, 08021 BARCELONA, SPAIN
SN 0213-005X
EI 1578-1852
J9 ENFERM INFEC MICR CL
JI Enferm. Infec. Microbiol. Clin.
PD AUG-SEP
PY 2017
VL 35
IS 7
BP 403
EP 410
DI 10.1016/j.eimc.2016.06.009
PG 8
WC Infectious Diseases; Microbiology
WE Science Citation Index Expanded (SCI-EXPANDED)
SC Infectious Diseases; Microbiology
GA FJ9BD
UT WOS:000413061500002
PM 27445177
DA 2022-08-20
ER

PT J
AU Aninagyei, E
   Ayivor-Djanie, R
   Attoh, J
   Dakorah, MP
   Ginko, MN
   Acheampong, DO
AF Aninagyei, Enoch
   Ayivor-Djanie, Reuben
   Attoh, Juliana
   Dakorah, Mavis Puopelle
   Ginko, Muniru Nuhu
   Acheampong, Desmond Omane
TI Molecular detection of Mycobacterium tuberculosis in blood stained
   sputum samples using GeneXpert PCR assay
SO DIAGNOSTIC MICROBIOLOGY AND INFECTIOUS DISEASE
LA English
DT Article
DE Blood spiked sputum; GeneXpert assay; blood lysing agent; protein
   denaturant; Mycobacterium tuberculosis
ID INHIBITION MECHANISMS; XPERT MTB/RIF; WHOLE-BLOOD; DNA; AMPLIFICATION;
   DENATURATION; BLOODSTAINS; GUANIDINIUM; HEMOGLOBIN; HEMOPTYSIS
AB This study investigated the possibility of detecting Mycobacterium tuberculosis (MTB) in blood-stained sputa with GeneXpert assay (Xpert MTB/Rif G4 v.5) using appropriate blood lysing (distilled water and distilled water/carbon tetrachloride) and protein denaturing (guanidinium chloride and heat) agents. Blood free sputa were collected from individuals infected with MTB. Various levels of blood-spiked sputa (0%& minus;50%) were prepared and subsequently assayed with GeneXpert analyzer. GeneXpert was found to be reproducible at less than 2% blood contamination. However, beyond 5% blood contamination, GeneXpert was unreliable with absolute PCR inhibition at 20% of blood contamination. Boiling at 95 degrees C for 5 minutes was able to recover MTB DNA in previously undetectable levels as well as in 57% of patients' sputa with blood stains with previous negative GeneXpert results.
   (c) 2021 Elsevier Inc. All rights reserved.
C1 [Aninagyei, Enoch; Ayivor-Djanie, Reuben] Univ Hlth & Allied Sci, Sch Basic & Biomed Sci, Dept Biomed Sci, Ho, Volta Region, Ghana.
   [Attoh, Juliana; Dakorah, Mavis Puopelle; Acheampong, Desmond Omane] Univ Cape Coast, Sch Allied Hlth Sci, Dept Biomed Sci, Cape Coast, Ghana.
   [Ginko, Muniru Nuhu] Ga West Municipal Hosp, Ghana Hlth Serv, Clin Lab Unit, Amasaman, Accra, Ghana.
RP Aninagyei, E (通讯作者)，Univ Hlth & Allied Sci, Sch Basic & Biomed Sci, Dept Biomed Sci, Ho, Volta Region, Ghana.; Acheampong, DO (通讯作者)，Univ Cape Coast, Sch Allied Hlth Sci, Dept Biomed Sci, Cape Coast, Ghana.
EM eaninagyei@uhas.edu.gh; dacheampong@ucc.edu.gh
OI Ayivor-Djanie, Reuben/0000-0003-0323-5473; Aninagyei,
   Enoch/0000-0002-6489-167X
FU National Tuberculosis Control Programme
FX Authors are thankful to the National Tuberculosis Control Programme for
   supporting this study. We also acknowledge the Ga West Municipal
   Director of Health Services, Medical Director and the laboratory staff
   of Ga West Municipal Hospital for supporting us in diverse way in the
   course of this study.
CR Abu Al-Soud W, 2000, J CLIN MICROBIOL, V38, P345
   Abu al-Soud W, 2001, J CLIN MICROBIOL, V39, P485, DOI 10.1128/JCM.39.2.485-493.2001
   AKANE A, 1994, J FORENSIC SCI, V39, P362
   Allahyartorkaman M, 2019, SCI REP-UK, V9, DOI 10.1038/s41598-019-55112-y
   Antwi-Baffour Samuel, 2015, BMC Res Notes, V8, P583, DOI 10.1186/s13104-015-1583-0
   Berkowitz N, 2018, DIABETES RES CLIN PR, V138, P16, DOI 10.1016/j.diabres.2018.01.018
   Bj_orkman, J CLIN MICROBIOL, V52
   Boehme CC, 2010, NEW ENGL J MED, V363, P1005, DOI 10.1056/NEJMoa0907847
   Burkardt HJ, 2000, CLIN CHEM LAB MED, V38, P87, DOI 10.1515/CCLM.2000.014
   Cavagnero S, 1998, BIOCHEMISTRY-US, V37, P3369, DOI 10.1021/bi9721795
   Connelly CM, 2014, BMC MED GENET, V15, DOI 10.1186/s12881-014-0130-5
   El-Helbawy RH, 2020, EGYPT J CHEST DIS TU, V69, P33, DOI 10.4103/ejcdt.ejcdt_84_19
   Feasey NA, 2013, J CLIN MICROBIOL, V51, P2311, DOI 10.1128/JCM.00330-13
   Ferreira PC, 2001, MOL MICROBIOL, V40, P1357, DOI 10.1046/j.1365-2958.2001.02478.x
   Friedrich SO, 2013, LANCET RESP MED, V1, P462, DOI 10.1016/S2213-2600(13)70119-X
   Gray K, 2014, FORENSIC SCI INT-GEN, V12, P86, DOI 10.1016/j.fsigen.2014.05.003
   Kim HY, 2001, RADIOGRAPHICS, V21, P839, DOI 10.1148/radiographics.21.4.g01jl06839
   KNOTTCRAIG CJ, 1993, J THORAC CARDIOV SUR, V105, P394
   Lakowicz, 2002, TOPICS FLUORESCENCE, V6, P221
   Leung AN, 1999, RADIOLOGY, V210, P307, DOI 10.1148/radiology.210.2.r99ja34307
   Lim WK, 2009, P NATL ACAD SCI USA, V106, P2595, DOI 10.1073/pnas.0812588106
   Lindsay B, 2013, J CLIN MICROBIOL, V51, P1740, DOI 10.1128/JCM.02713-12
   Lu YJ, 2018, INT J INFECT DIS, V71, P14, DOI 10.1016/j.ijid.2018.01.030
   Mason PE, 2009, J AM CHEM SOC, V131, P16689, DOI 10.1021/ja903478s
   McAfee JG, 1996, BIOCHEMISTRY-US, V35, P4034, DOI 10.1021/bi952555q
   Meyer AJ, 2017, PLOS ONE, V12, DOI 10.1371/journal.pone.0180572
   MIDDLETON JR, 1977, CHEST, V72, P601, DOI 10.1378/chest.72.5.601
   Trang NV, 2015, EPIDEMIOL INFECT, V143, P3292, DOI 10.1017/S095026881500059X
   O'Brien EP, 2007, J AM CHEM SOC, V129, P7346, DOI 10.1021/ja069232+
   Opel KL, 2010, J FORENSIC SCI, V55, P25, DOI 10.1111/j.1556-4029.2009.01245.x
   Pappenberger G, 1997, J MOL BIOL, V274, P676, DOI 10.1006/jmbi.1997.1421
   Pfeil W, 1997, J MOL BIOL, V272, P591, DOI 10.1006/jmbi.1997.1278
   Potekhin SA, 2000, J THERM ANAL CALORIM, V62, P111, DOI 10.1023/A:1010114828690
   Radstrom P, 2004, MOL BIOTECHNOL, V26, P133, DOI 10.1385/MB:26:2:133
   ROSSEN L, 1992, INT J FOOD MICROBIOL, V17, P37, DOI 10.1016/0168-1605(92)90017-W
   SAULNIER P, 1992, J CLIN MICROBIOL, V30, P2080, DOI 10.1128/JCM.30.8.2080-2083.1992
   Sidstedt M, 2018, ANAL BIOANAL CHEM, V410, P2569, DOI 10.1007/s00216-018-0931-z
   Sidstedt M, 2017, ANAL CHEM, V89, P1642, DOI 10.1021/acs.analchem.6b03746
   Singh I, 2017, J NEUROL SCI, V379, P49, DOI 10.1016/j.jns.2017.05.042
   Steingart KR, 2014, COCHRANE DB SYST REV, DOI [10.1002/14651858.CD009593.pub3, 10.1002/14651858.CD009593.pub2]
   Tran TND, 2013, J VIROL METHODS, V187, P138, DOI 10.1016/j.jviromet.2012.09.021
   Wilson IG, 1997, APPL ENVIRON MICROB, V63, P3741, DOI 10.1128/AEM.63.10.3741-3751.1997
   Wingfield P T, 2001, Curr Protoc Protein Sci, VAppendix 3, p3A, DOI 10.1002/0471140864.psa03as00
   Xia J, 2017, J INFECT DIS PREVE M, V5, P161, DOI [10.4172/2329- 8731.1000161, DOI 10.4172/2329-8731.1000161]
   Zheng WW, 2015, J CHEM THEORY COMPUT, V11, P5543, DOI 10.1021/acs.jctc.5b00778
NR 45
TC 0
Z9 0
U1 0
U2 2
PU ELSEVIER SCIENCE INC
PI NEW YORK
PA STE 800, 230 PARK AVE, NEW YORK, NY 10169 USA
SN 0732-8893
EI 1879-0070
J9 DIAGN MICR INFEC DIS
JI Diagn. Microbiol. Infect. Dis.
PD JUL
PY 2021
VL 100
IS 3
AR 115363
DI 10.1016/j.diagmicrobio.2021.115363
EA MAR 2021
PG 8
WC Infectious Diseases; Microbiology
WE Science Citation Index Expanded (SCI-EXPANDED)
SC Infectious Diseases; Microbiology
GA SO8BN
UT WOS:000659200000001
PM 33743471
DA 2022-08-20
ER

PT J
AU Andriyoko, B
   Janiar, H
   Kusumadewi, R
   Klinkenberg, E
   de Haas, P
   Tiemersma, E
AF Andriyoko, Basti
   Janiar, Harini
   Kusumadewi, Retno
   Klinkenberg, Eveline
   de Haas, Petra
   Tiemersma, Edine
TI Simple stool processing method for the diagnosis of pulmonary
   tuberculosis using GeneXpert MTB/RIF
SO EUROPEAN RESPIRATORY JOURNAL
LA English
DT Letter
ID XPERT MTB/RIF; MYCOBACTERIUM-TUBERCULOSIS; CHILDREN; HIV
C1 [Andriyoko, Basti] Hasan Sadikin Gen Hosp, Dept Clin Pathol, Mol Biol Div, Bandung, Indonesia.
   [Janiar, Harini] KNCV TB Fdn, Indonesia Off, Jakarta, Indonesia.
   [Kusumadewi, Retno] Natl TB Program, Jakarta, Indonesia.
   [Klinkenberg, Eveline; de Haas, Petra; Tiemersma, Edine] KNCV TB Fdn, The Hague, Netherlands.
   [Klinkenberg, Eveline] Acad Med Ctr, Amsterdam Inst Global Hlth & Dev, Dept Global Hlth, Amsterdam, Netherlands.
RP de Haas, P (通讯作者)，KNCV TB Fdn, POB 146, NL-2501 CC The Hague, Netherlands.
EM petra.dehaas@kncvtbc.org
FU US Agency for International Development (USAID) through Challenge TB
   [AID-OAA-A-14-00029]
FX This work was partly funded by US Agency for International Development
   (USAID) through Challenge TB under the terms of Agreement No.
   AID-OAA-A-14-00029. The contents are the responsibility of the authors
   and do not necessarily reflect the views of USAID or the US Government.
   Funding information for this article has been deposited with the
   Crossref Funder Registry.
CR Banada PP, 2016, PLOS ONE, V11, DOI 10.1371/journal.pone.0151980
   Bonnave PE, 2013, EUR J CLIN MICROBIOL, V32, P569, DOI 10.1007/s10096-012-1776-6
   Cordova J, 2010, J CLIN MICROBIOL, V48, P1820, DOI 10.1128/JCM.01161-09
   Graham SM, 2015, CLIN INFECT DIS, V61, pS179, DOI 10.1093/cid/civ581
   Hasan Zahra, 2017, BMC Res Notes, V10, P473, DOI 10.1186/s13104-017-2806-3
   Helb D, 2010, J CLIN MICROBIOL, V48, P229, DOI 10.1128/JCM.01463-09
   Hillemann D, 2011, J CLIN MICROBIOL, V49, P1202, DOI 10.1128/JCM.02268-10
   Lawn SD, 2016, T ROY SOC TROP MED H, V110, P180, DOI 10.1093/trstmh/trw008
   Marcy O, 2016, CLIN INFECT DIS, V62, P1161, DOI 10.1093/cid/ciw036
   Nicol MP, 2013, CLIN INFECT DIS, V57, pE18, DOI 10.1093/cid/cit230
   Walter E, 2018, J CLIN MICROBIOL, V56, DOI [10.1128/jcm.00781-18, 10.1128/JCM.00781-18]
   Walters E, 2017, PEDIATR INFECT DIS J, V36, P837, DOI 10.1097/INF.0000000000001563
   Wood R, 2012, BMC INFECT DIS, V12, DOI 10.1186/1471-2334-12-47
   World Health Organization, 2013, AUT REALT NUCL AC AM
NR 14
TC 7
Z9 7
U1 1
U2 5
PU EUROPEAN RESPIRATORY SOC JOURNALS LTD
PI SHEFFIELD
PA 442 GLOSSOP RD, SHEFFIELD S10 2PX, ENGLAND
SN 0903-1936
EI 1399-3003
J9 EUR RESPIR J
JI Eur. Resp. J.
PD MAR 1
PY 2019
VL 53
IS 3
AR 1801832
DI 10.1183/13993003.01832-2018
PG 3
WC Respiratory System
WE Science Citation Index Expanded (SCI-EXPANDED)
SC Respiratory System
GA HP6WE
UT WOS:000461827000015
PM 30578382
OA Bronze
DA 2022-08-20
ER

PT J
AU Singh, UB
   Pandey, P
   Mehta, G
   Bhatnagar, AK
   Mohan, A
   Goyal, V
   Ahuja, V
   Ramachandran, R
   Sachdeva, KS
   Samantaray, JC
AF Singh, Urvashi B.
   Pandey, Pooja
   Mehta, Girija
   Bhatnagar, Anuj K.
   Mohan, Anant
   Goyal, Vinay
   Ahuja, Vineet
   Ramachandran, Ranjani
   Sachdeva, Kuldeep S.
   Samantaray, Jyotish C.
TI Genotypic, Phenotypic and Clinical Validation of GeneXpert in
   Extra-Pulmonary and Pulmonary Tuberculosis in India
SO PLOS ONE
LA English
DT Article
ID XPERT MTB/RIF ASSAY; MYCOBACTERIUM-TUBERCULOSIS; RIFAMPIN RESISTANCE;
   DRUG-RESISTANCE; RAPID DIAGNOSIS; RPOB GENE; PERFORMANCE; COMPLEX;
   HETERORESISTANCE; EPIDEMIOLOGY
AB Background
   Newer molecular diagnostics have brought paradigm shift in early diagnosis of tuberculosis [TB]. WHO recommended use of GeneXpert MTB/RIF [Xpert] for Extra-pulmonary [EP] TB; critics have since questioned its efficiency.
   Methods
   The present study was designed to assess the performance of GeneXpert in 761 extra-pulmonary and 384 pulmonary specimens from patients clinically suspected of TB and compare with Phenotypic, Genotypic and Composite reference standards [CRS].
   Results
   Comparison of GeneXpert results to CRS, demonstrated sensitivity of 100% and 90.68%, specificity of 100% and 99.62% for pulmonary and extra-pulmonary samples. On comparison with culture, sensitivity for Rifampicin [Rif] resistance detection was 87.5% and 81.82% respectively, while specificity was 100% for both pulmonary and extra-pulmonary TB. On comparison to sequencing of rpoB gene [Rif resistance determining region, RRDR], sensitivity was respectively 93.33% and 90% while specificity was 100% in both pulmonary and extra-pulmonary TB. GeneXpert assay missed 533CCG mutation in one sputum and dual mutation [517 & 519] in one pus sample, detected by sequencing. Sequencing picked dual mutation [529, 530] in a sputum sample sensitive to Rif, demonstrating, not all RRDR mutations lead to resistance.
   Conclusions
   Current study reports observations in a patient care setting in a high burden region, from a large collection of pulmonary and extra-pulmonary samples and puts to rest questions regarding sensitivity, specificity, detection of infrequent mutations and mutations responsible for low-level Rif resistance by GeneXpert. Improvements in the assay could offer further improvement in sensitivity of detection in different patient samples; nevertheless it may be difficult to improve sensitivity of Rif resistance detection if only one gene is targeted. Assay specificity was high both for TB detection and Rif resistance detection. Despite a few misses, the assay offers major boost to early diagnosis of TB and MDR-TB, in difficult to diagnose pauci-bacillary TB.
C1 [Singh, Urvashi B.; Pandey, Pooja; Mehta, Girija; Samantaray, Jyotish C.] All India Inst Med Sci, Dept Microbiol, New Delhi 110029, India.
   [Bhatnagar, Anuj K.] Rajan Babu Inst Pulm Med & TB, Delhi, India.
   [Mohan, Anant] All India Inst Med Sci, Dept Pulm Med & Sleep Disorders, New Delhi, India.
   [Goyal, Vinay] All India Inst Med Sci, Dept Neurol, New Delhi, India.
   [Ahuja, Vineet] All India Inst Med Sci, Dept Gastroenterol & Human Nutr, New Delhi, India.
   [Ramachandran, Ranjani] WHO, Country Off India, New Delhi, India.
   [Sachdeva, Kuldeep S.] Govt India, Cent TB Div, New Delhi, India.
RP Singh, UB (通讯作者)，All India Inst Med Sci, Dept Microbiol, New Delhi 110029, India.
EM drurvashi@gmail.com
RI Ahuja, Vineet/N-1705-2019; Kedia, Saurabh/AAD-7227-2020
OI Ahuja, Vineet/0000-0002-5474-9709; 
FU Indian Council of Medical Research [5/8/5/27/2011-ECD-1]; Indian Council
   of Medical Research [ICMR]
FX This work was supported by Indian Council of Medical Research
   5/8/5/27/2011-ECD-1, http://www.icmr.nic.in/ (UBS). The funder had no
   role in study design, data collection and analysis, decision to publish,
   or preparation of the manuscript.; We thank all our patients that made
   this study possible. We also thank the technical staff of TB division,
   Department of Microbiology, AIIMS, New Delhi, India for their support.
   The authors acknowledge the funding received from Indian Council of
   Medical Research [ICMR].
CR Al-Mutairi NM, 2011, INT J TUBERC LUNG D, V15, P110
   Blakemore R, 2010, J CLIN MICROBIOL, V48, P2495, DOI 10.1128/JCM.00128-10
   Boehme CC, 2010, NEW ENGL J MED, V363, P1005, DOI 10.1056/NEJMoa0907847
   Central TB Division Ministry of Health and Family Welfare, 2010, TRAIN MOD MED PRACT
   Central TB Division Ministry of Health and Family Welfare, 2009, TRAIN MAN MYC TUB CU
   Central TB Division Ministry of Health and Family Welfare New Delhi India Revised National TB Control Programme, 2012, GUIDELINES PROGRAMMA
   Chakravorty S, 2012, J CLIN MICROBIOL, V50, P2194, DOI 10.1128/JCM.00143-12
   Denkinger CM, 2014, EUR RESPIR J, V44, P435, DOI 10.1183/09031936.00007814
   El-Hajj HH, 2001, J CLIN MICROBIOL, V39, P4131, DOI 10.1128/JCM.39.11.4131-4137.2001
   Friedrich SO, 2011, J CLIN MICROBIOL, V49, P4341, DOI 10.1128/JCM.05454-11
   Gandhi NR, 2010, AM J RESP CRIT CARE, V181, P80, DOI 10.1164/rccm.200907-0989OC
   Helb D, 2010, J CLIN MICROBIOL, V48, P229, DOI 10.1128/JCM.01463-09
   Huang WL, 2009, J CLIN MICROBIOL, V47, P2520, DOI 10.1128/JCM.02499-08
   Jamieson FB, 2014, J CLIN MICROBIOL, V52, P2157, DOI 10.1128/JCM.00691-14
   Jou R, 2005, J CLIN MICROBIOL, V43, P1390, DOI 10.1128/JCM.43.3.1390-1394.2005
   Kim S., 2012, J NANOMATER, V2012, P1, DOI DOI 10.1080/19443994.2012.664382
   KUBICA GP, 1963, AM REV RESPIR DIS, V87, P775
   Ligthelm LJ, 2011, J CLIN MICROBIOL, V49, P3967, DOI 10.1128/JCM.01310-11
   Mathema B, 2006, CLIN MICROBIOL REV, V19, P658, DOI 10.1128/CMR.00061-05
   Rigouts L, 2013, J CLIN MICROBIOL, V51, P2641, DOI 10.1128/JCM.02741-12
   Sharma SK, 2004, INDIAN J MED RES, V120, P354
   Siddiqi S.H., 2006, MGIT PROCEDURE MANUA
   Somoskovi A, 2014, J CLIN MICROBIOL, V52, P705, DOI 10.1128/JCM.02682-13
   Somoskovi A, 2006, J CLIN MICROBIOL, V44, P4459, DOI 10.1128/JCM.01506-06
   SUO J, 1988, AM REV RESPIR DIS, V138, P999, DOI 10.1164/ajrccm/138.4.999
   Suresh N, 2006, INFECT GENET EVOL, V6, P474, DOI 10.1016/j.meegid.2006.03.001
   Taniguchi H, 1996, FEMS MICROBIOL LETT, V144, P103, DOI 10.1111/j.1574-6968.1996.tb08515.x
   Thomsen Todd W, 2006, N Engl J Med, V355, pe16, DOI 10.1056/NEJMvcm053812
   Tortoli E, 2012, EUR RESPIR J, V40, P442, DOI 10.1183/09031936.00176311
   Vadwai V, 2011, J CLIN MICROBIOL, V49, P2540, DOI 10.1128/JCM.02319-10
   Van Deun A, 2011, INT J TUBERC LUNG D, V15, P116
   Van Deun A, 2009, J CLIN MICROBIOL, V47, P3501, DOI 10.1128/JCM.01209-09
   Van Deun A, 2013, J CLIN MICROBIOL, V51, P2633, DOI 10.1128/JCM.00553-13
   van Rie A, 2005, AM J RESP CRIT CARE, V172, P636, DOI 10.1164/rccm.200503-449OC
   VANSOOLINGEN D, 1991, J CLIN MICROBIOL, V29, P2578, DOI 10.1128/JCM.29.11.2578-2586.1991
   Varma-Basil M, 2004, J CLIN MICROBIOL, V42, P5512, DOI 10.1128/JCM.42.12.5512-5516.2004
   Victor TC, 2002, IUBMB LIFE, V53, P231, DOI 10.1080/15216540212642
   WHO, STANDARD OPERATING P
   World Health Organisation, 2011, RAP IMPL XPERT MTB R
   World Health Organization, 2008, POL STAT
   World Health Organization, 2013, DEF REP FRAM TUB 201
   World Health Organization, 2007, US LIQ TB CULT DRUG
   Zeka AN, 2011, J CLIN MICROBIOL, V49, P4138, DOI 10.1128/JCM.05434-11
   Zetola NM, 2014, J CLIN MICROBIOL, V52, P2422, DOI 10.1128/JCM.02489-13
   Zhang ZJ, 2014, ANTIMICROB AGENTS CH, V58, P5632, DOI 10.1128/AAC.02778-14
NR 46
TC 33
Z9 35
U1 0
U2 4
PU PUBLIC LIBRARY SCIENCE
PI SAN FRANCISCO
PA 1160 BATTERY STREET, STE 100, SAN FRANCISCO, CA 94111 USA
SN 1932-6203
J9 PLOS ONE
JI PLoS One
PD FEB 19
PY 2016
VL 11
IS 2
AR e0149258
DI 10.1371/journal.pone.0149258
PG 16
WC Multidisciplinary Sciences
WE Science Citation Index Expanded (SCI-EXPANDED)
SC Science & Technology - Other Topics
GA DF3DG
UT WOS:000371223400042
PM 26894283
OA Green Published, Green Submitted, gold
DA 2022-08-20
ER

PT J
AU Saeed, M
   Hussain, S
   Riaz, S
   Rasheed, F
   Ahmad, M
   Iram, S
   Arif, M
   Rahmani, TH
   Anwar, AI
AF Saeed, Muhammad
   Hussain, Shahida
   Riaz, Saba
   Rasheed, Farhan
   Ahmad, Maqsood
   Iram, Shagufta
   Arif, Mizna
   Rahmani, Tariq Hamid
   Anwar, Ambereen Imran
TI GeneXpert Technology for the diagnosis of HIV-associated tuberculosis:
   Is scale-up worth it?
SO OPEN LIFE SCIENCES
LA English
DT Article
DE tuberculosis; HIV and TB co-infection; GeneXpert; multidrug resistance
ID MYCOBACTERIUM-TUBERCULOSIS; RAPID DETECTION; RESISTANCE; CARE
AB Recent evaluations of the GeneXpert MTB/RIF assay for the simultaneous detection of Mycobacterium tuberculosis and drug resistance in less than 2 h have stimulated tremendous enthusiasm. This is the breakthrough that tuberculosis (TB) control has been waiting for. In this (retrospective review) case study, sputum samples from strongly suspected pulmonary tuberculosis patients were collected and assessed for the GeneXpert MTB/RIF assay for diagnosing TB and drug resistance in comparison with other tests, including Ziehl-Neelsen smear and Lowenstein-Jensen test. Of 3,784 cases, 5.7% (216/3,784) were human immunodeficiency virus (HIV)-positive and TB co-infected patients. In diagnosing HIV-positive and TB co-infected cases, the sensitivity and specificity of GeneXpert were 76.4% and 100%. While in HIV-negative and TB suspected cases, the sensitivity and specificity were 95.6% and 100%. This new test represents a major milestone for global TB diagnosis and care. It also represents new hope for the millions of people who are at the highest risk of TB and drug-resistant disease. GeneXpert is World Health Organization-endorsed technology representing the gold standard for TB testing despite attaining less sensitivity for HIV and TB co-infected patients as compared to HIV-negative patients.
C1 [Hussain, Shahida; Riaz, Saba] Punjab Univ Lahore, Dept Microbiol & Mol Genet MMG, Lahore 54590, Punjab, Pakistan.
   [Saeed, Muhammad] Dist Head Quarter Hosp Mandi Bahauddin, Dept Pathol, Med Lab Technologist Manager Pathol & Transfus Me, Lahore 50400, Punjab, Pakistan.
   [Rasheed, Farhan] Allama Iqbal Med Coll & Jinnah Hosp AIMC & JHL La, Dept Pathol, Microbiol Sect, Lahore 54590, Punjab, Pakistan.
   [Ahmad, Maqsood] Govt Coll Univ Faisalabad, Lahore 38000, Punjab, Pakistan.
   [Iram, Shagufta] Allama Iqbal Med Coll, Dept Pathol, Microbiol Sect, Lahore 54590, Punjab, Pakistan.
   [Arif, Mizna] Postgrad Med Inst Lahore, Lahore 54590, Punjab, Pakistan.
   [Rahmani, Tariq Hamid] Ameer Iqbal Med Coll Lahore, Dept Pathol, Lahore 54590, Punjab, Pakistan.
   [Anwar, Ambereen Imran] Allama Iqbal Med Coll, Dept Pathol, Lahore 54590, Punjab, Pakistan.
RP Riaz, S (通讯作者)，Punjab Univ Lahore, Dept Microbiol & Mol Genet MMG, Lahore 54590, Punjab, Pakistan.
EM mian.scientist@yahoo.com; shahidahussain100@gmail.com;
   saba.mmg@pu.edu.pk; dr.farhanrasheed@gmail.com;
   maqsoodahmad64@yahoo.com; s.irem@gmail.com; miznarida@gmail.com;
   tariq.rehmani@gmail.com; ambreen.imran@yahoo.com
RI Riaz, Saba/AAA-7053-2021
OI Rasheed, Farhan/0000-0002-5404-1970
CR Abaye GE, 2017, PLOS ONE, V12, DOI 10.1371/journal.pone.0177529
   Aibana O, 2017, BMC INFECT DIS, V17, DOI 10.1186/s12879-017-2230-2
   Al-Darraji HAA, 2013, PLOS ONE, V8, DOI 10.1371/journal.pone.0073717
   Arora D, 2015, J CLIN DIAGN RES JCD, V9, P3
   Bansal R, 2019, ANN PATHOL LAB MED, V6, P2
   Barac A, 2019, LUNG, V197, P651, DOI 10.1007/s00408-019-00241-4
   Bell LCK, 2018, NAT REV MICROBIOL, V16, P80, DOI 10.1038/nrmicro.2017.128
   Boehme CC, 2011, LANCET, V377, P1495, DOI 10.1016/S0140-6736(11)60438-8
   Carriquiry G, 2012, PLOS ONE, V7, DOI 10.1371/journal.pone.0044626
   DaSilva ERO, 2017, BMC INFECT DIS, V17, P373, DOI DOI 10.1186/s12879-017-2473-y
   Floyd K, 2018, LANCET RESP MED, V6, P299, DOI 10.1016/S2213-2600(18)30057-2
   Gandhi NR, 2010, AM J RESP CRIT CARE, V181, P80, DOI 10.1164/rccm.200907-0989OC
   Hasnain J, 2012, BMJ OPEN, V2, DOI 10.1136/bmjopen-2012-001677
   Helb D, 2010, J CLIN MICROBIOL, V48, P229, DOI 10.1128/JCM.01463-09
   Khalil R., 2016, INT J RES MED SCI, P789, DOI [10.18203/2320-6012.ijrms20160519, DOI 10.18203/2320-6012.IJRMS20160519]
   Marlowe EM, 2011, J CLIN MICROBIOL, V49, P1621, DOI 10.1128/JCM.02214-10
   Mazibuko J., 2017, EXPERIENCES NURSE MA
   Rahmani M, 2016, BIOMEDICA, V32, P93
   Saeed M, 2017, J PAK MED ASSOC, V67, P270
   Sah AK, 2017, CURR MICROBIOL, V74, P1026, DOI 10.1007/s00284-017-1279-x
   Scott LE, 2011, PLOS MED, V8, DOI 10.1371/journal.pmed.1001061
   Sekyere JO, 2019, SCI REP, V9, P1
   Siddiqui AUR, 2011, BMJ OPEN, V1, DOI 10.1136/bmjopen-2011-000154
   Sumalani KK, 2019, INT J TUBERC LUNG D, V23, P1213, DOI 10.5588/ijtld.18.0830
   Tafuma TA, 2014, PLOS ONE, V9, DOI 10.1371/journal.pone.0088654
   Tahseen S, 2018, INT J TUBERC LUNG D, V22, P187, DOI 10.5588/ijtld.17.0390
   WHO, 2018, WHAT IS MULT RES TUB
   World Health Organization, 2018, COMP WHO GUID ASS ST
   World Health Organization, 2017, HEP STI PROGR MAN M
   World Health Organization (WHO), 2013, GLOB UPD HIV TREATM
NR 30
TC 0
Z9 0
U1 0
U2 3
PU DE GRUYTER POLAND SP Z O O
PI WARSAW
PA BOGUMILA ZUGA 32A STR, 01-811 WARSAW, MAZOVIA, POLAND
SN 2391-5412
J9 OPEN LIFE SCI
JI Open Life Sci.
PY 2020
VL 15
IS 1
BP 458
EP 465
DI 10.1515/biol-2020-0052
PG 8
WC Biology
WE Science Citation Index Expanded (SCI-EXPANDED)
SC Life Sciences & Biomedicine - Other Topics
GA MG9VE
UT WOS:000546379500001
PM 33817234
OA gold, Green Published
DA 2022-08-20
ER

PT J
AU Guenaoui, K
   Harir, N
   Ouardi, A
   Zeggai, S
   Sellam, F
   Bekri, F
   Touil, SC
AF Guenaoui, Kheira
   Harir, Noria
   Ouardi, Aissa
   Zeggai, Soumia
   Sellam, Feriel
   Bekri, Farid
   Touil, Sakina Cherif
TI Use of GeneXpert Mycobacterium tuberculosis/rifampicin for rapid
   detection of rifampicin resistant Mycobacterium tuberculosis strains of
   clinically suspected multi-drug resistance tuberculosis cases
SO ANNALS OF TRANSLATIONAL MEDICINE
LA English
DT Article
DE Mycobacterium tuberculosis (MTB); rifampicin resistance; multi-drug
   resistance (MDR); GeneXpert MTB/RIF
ID DRUG-RESISTANCE; MTB/RIF ASSAY; DIAGNOSIS; GUJARAT
AB Background: Multi-drug resistance (MDR) TB is defined as tuberculosis (TB) disease caused by a strain of Mycobacterium tuberculosis (MTB) that was resistant to at least isoniazid and rifampicin (RIF). Emerging Multidrug-Resistant TB is one of the major concerns of health policy and rapid detection of M. tuberculosis and detection of RIF resistance in infected patients are essential for disease management. The aim of this study was to evaluate patterns of RIF resistance in cases of sputum positive pulmonary TB by using GeneXpert MTB/RIF and comparing between phenotypic and genotypic testing of RIF resistance in MTB strains of clinically suspected MDR-TB isolated cases in western Algeria.
   Methods: In this study 50 sputum positive cases of pulmonary TB who were potential MDR suspect were included. Their sputum samples were collected and subjected to sputum smear microscopy, culture and conventional MTB/RIF test followed by GeneXpert MTB/RIF assay.
   Results: Of total 50 cases included in this study, MTB was detected in all patients (100%) by GeneXpert MTB/RIF. However, RIF's resistance was detected in only 21 cases (42%) by GeneXpert MTB/RIF. All RIF resistant strains detected by GeneXpert MTB/RIF were phenotypically confirmed as MDR strains. 42.85% of cases were retreatment failure cases, retreatment cases smear positive at 4 months were 23.82%. While 19.05% of cases were retreatment cases smear positive at diagnosis, and 14.28% patient had history of contact with MDR-TB. Sensitivity, specificity, positive predictive value and negative predictive value of Xpert MTB/RIF to detect RIF resistance in comparison to conventional phenotypic drug susceptibility technique were found equal to the rates of 100%, 100%, 100% and 100%, respectively.
   Conclusions: GeneXpert MTB/RIF assay is efficient and reliable technique for the rapid diagnostic of TB. It's simplicity, high sensitivity and specificity for RIF resistance detection make this technique a very attractive tool for diagnostic of MTB and RIF resistance in MDR cases.
C1 [Guenaoui, Kheira; Harir, Noria; Zeggai, Soumia; Sellam, Feriel] Djillali Liabes Univ Sidi Bel Abbes, Dept Biol, Lab Mol Microbiol Prote & Hlth, Sidi Bel Abbes, Algeria.
   [Ouardi, Aissa; Bekri, Farid] CHU Oran, Dept Pneumophtisiol Point B, Oran, Algeria.
   [Touil, Sakina Cherif] Tenon Hosp, Dept Biol Hematol, Paris, France.
RP Harir, N (通讯作者)，Djillali Liabes Univ Sidi Bel Abbes, Dept Biol, Sidi Bel Abbes, Algeria.
EM harirnouria@yahoo.fr
CR Barnard M, 2012, AM J RESP CRIT CARE, V186, P1298, DOI 10.1164/rccm.201205-0960OC
   Boehme CC, 2010, NEW ENGL J MED, V363, P1005, DOI 10.1056/NEJMoa0907847
   Chang K, 2012, J INFECTION, V64, P580, DOI 10.1016/j.jinf.2012.02.012
   Chowgule R V, 1998, Indian J Chest Dis Allied Sci, V40, P23
   Daniel O, 2011, ASIAN PAC J TROP MED, V4, P148, DOI 10.1016/S1995-7645(11)60057-6
   Darwish M., 2013, African Journal of Microbiology Research, V7, P5107
   Dosumu EA, 2008, AFR J RESP MED, V4, P22
   Faustini A, 2006, THORAX, V61, P158, DOI 10.1136/thx.2005.045963
   Ganguly J, 2015, J EVOL MED DENT SCI-, V4, P4762, DOI 10.14260/jemds/2015/692
   Garcia de Viedma D, 2003, CLIN MICROBIOL INFEC, V9, P349, DOI 10.1046/j.1469-0691.2003.00695.x
   Helb D, 2010, J CLIN MICROBIOL, V48, P229, DOI 10.1128/JCM.01463-09
   Idigbe O, 1998, INT C AIDS, V12, P137
   Ioannidis P, 2011, J CLIN MICROBIOL, V49, P3068, DOI 10.1128/JCM.00718-11
   JAIN NK, 1992, INDIAN J TUBERC, V39, P121
   Lawson L, 2010, ANN AFR MED, V9, P184, DOI 10.4103/1596-3519.68355
   Marlowe EM, 2011, J CLIN MICROBIOL, V49, P1621, DOI 10.1128/JCM.02214-10
   Neonakis IK, 2008, J MICROBIOL METH, V75, P1, DOI 10.1016/j.mimet.2008.05.023
   Olusoji D, 2013, GLOBAL ADV RES J MIC, V2, P22
   Quy HTW, 2003, INT J TUBERC LUNG D, V7, P631
   Rasaki SO, 2014, J INFECT DIS THER, V2, P139, DOI [10.4172/2332-0877.1000139, DOI 10.4172/2332-0877.1000139]
   RIGOUTS L, 1994, TUBERCLE LUNG DIS, V75, P160, DOI 10.1016/0962-8479(94)90051-5
   Robert J, 2003, EUR RESPIR J, V22, P833, DOI 10.1183/09031936.03.00014103
   Shah AR, 2002, INT J TUBERC LUNG D, V6, P1098
   Sharma SK, 2011, INDIAN J MED RES, V133, P312
   Single N, 2011, INT J TUBERC LUNG D, V15, P1326, DOI 10.5588/ijtld.10.0564
   Steingart KR, 2014, COCHRANE DB SYST REV, DOI [10.1002/14651858.CD009593.pub3, 10.1002/14651858.CD009593.pub2]
   Thomas Aleyamma, 2007, Indian J Tuberc, V54, P117
   TRIVEDI SS, 1988, TUBERCLE, V69, P37, DOI 10.1016/0041-3879(88)90038-4
   *WHO, EP FACT SHEETS HIV A
   World Health Organisation, 2011, RAP IMPL XPERT MTB R
   World Health Organization, 2010, MULTIDRUG EXTENSIVEL
   World Health Organization, 2011, GLOB TUB CONTR
   World Health Organization, 2014, WHOHTMTB201408
   Yoshiyama T, 2004, INT J TUBERC LUNG D, V8, P31
   Zakham Fathiah, 2013, Infect Drug Resist, V6, P207, DOI 10.2147/IDR.S47724
NR 37
TC 19
Z9 21
U1 0
U2 3
PU AME PUBL CO
PI SHATIN
PA FLAT-RM C 16F, KINGS WING PLAZA 1, NO 3 KWAN ST, SHATIN, HONG KONG
   00000, PEOPLES R CHINA
SN 2305-5839
EI 2305-5847
J9 ANN TRANSL MED
JI ANN. TRANSL. MED.
PD MAY
PY 2016
VL 4
IS 9
AR 168
DI 10.21037/atm.2016.05.09
PG 6
WC Oncology; Medicine, Research & Experimental
WE Science Citation Index Expanded (SCI-EXPANDED)
SC Oncology; Research & Experimental Medicine
GA DY0NC
UT WOS:000384792500012
PM 27275481
OA Green Published
DA 2022-08-20
ER

PT J
AU Izudi, J
   Tamwesigire, IK
   Bajunirwe, F
AF Izudi, Jonathan
   Tamwesigire, Imelda K.
   Bajunirwe, Francis
TI Association between GeneXpert Diagnosis and Same-Day Initiation of
   Tuberculosis Treatment in Rural Eastern Uganda
SO AMERICAN JOURNAL OF TROPICAL MEDICINE AND HYGIENE
LA English
DT Article
ID MTB/RIF
AB Diagnosis of tuberculosis with GeneXpert and same-day initiation of tuberculosis treatment (SITT) has important public health and clinical benefits. GeneXpert allows for rapid diagnosis, hence presenting an opportunity for SITT. We determined the association between GeneXpert diagnosis and SITT, and the effect of SITT on treatment success rate among adult persons with bacteriologically confirmed pulmonary tuberculosis (BC-PTB) in rural eastern Uganda. We conducted a retrospective cohort study using routinely collected data at 10 health facilities, used modified Poisson regression analysis to determine the association between GeneXpert and SITT, and expressed the results as risk ratio (RR). We used propensity score-matched analysis to match SITT participants to delayed initiation of treatment (DIT) participants and then performed logistic regression analysis to determine the independent effect of SITT on treatment success rate, expressed as odds ratio (OR). Of 1,045 participants, 764 (73.1%) had SITT. The use of GeneXpert for diagnosis of tuberculosis was associated with higher likelihood of SITT (adjusted RR [aRR], 1.28; 95% CI: 1.19-1.37) and for persons with new BC-PTB diagnosis (aRR, 1.16; 95% CI: 1.02-1.32). We successfully matched 530 participants (265 in SITT and 265 in DIT) through 1:1 nearest neighbor caliper matching. Before propensity score-matched analysis, SITT was not significantly associated with treatment success rate (adjusted OR, 0.97; 95% CI: 0.70-1.33). After propensity score-matched analysis, SITT remained nonsignificantly associated with treatment success rate (OR, 0.96; 95% CI: 0.67-1.40). GeneXpert thus increases the likelihood of SITT, but SITT has no significant effect on treatment success rate.
C1 [Izudi, Jonathan; Tamwesigire, Imelda K.; Bajunirwe, Francis] Mbarara Univ Sci & Technol, Fac Med, Dept Community Hlth, Kabale Rd,POB 1410, Mbarara, Uganda.
RP Izudi, J (通讯作者)，Mbarara Univ Sci & Technol, Fac Med, Dept Community Hlth, Kabale Rd,POB 1410, Mbarara, Uganda.
EM jonahzd@gmail.com; itamwesigire@gmail.com; fbaj@yahoo.com
OI Izudi, Jonathan/0000-0001-9065-0389
FU German Academic Exchange Services (DAAD)
FX We are indebted to the German Academic Exchange Services (DAAD) for
   awarding the primary author a scholarship to pursue doctoral studies at
   Mbarara University of Science and Technology, Uganda. Wealso acknowledge
   the district health officers of Soroti, Kumi, Serere, and Ngora
   districts for granting administrative clearance to collect tuberculosis
   data at respective study sites. We appreciate the support given by the
   district tuberculosis and leprosy supervisors of Serere, Soroti, Kumi,
   and Ngora districts; the tuberculosis focal persons of respective study
   sites; and the research assistants. We extend our gratitude to the East
   Africa Social Science Translation (EASST) Collaborative and the Center
   for Effective Global Action (CEGA) at the University of California,
   Berkley, for organizing the training on impact evaluation that supported
   the design and analysis of this manuscript. In particular, we thank
   Damazo T. Kadengye. The American Society of Tropical Medicine and
   Hygiene (ASTMH) assisted with publication expenses.
CR Adenager Getinet Shewaseged, 2017, Tuberc Res Treat, V2017, P5120841, DOI 10.1155/2017/5120841
   Ali SM, 2018, BMC PUBLIC HEALTH, V18, DOI 10.1186/s12889-018-5222-2
   Annabel B., 2019, GLOBAL TUBERCULOSIS
   Asres A, 2018, BMC PULM MED, V18, DOI 10.1186/s12890-018-0628-2
   Clouse K, 2017, PLOS ONE, V12, DOI 10.1371/journal.pone.0171384
   Davis JL, 2013, LANCET INFECT DIS, V13, P147, DOI 10.1016/S1473-3099(12)70232-3
   Durovni B, 2014, PLOS MED, V11, DOI 10.1371/journal.pmed.1001766
   Getnet F, 2017, BMC PULM MED, V17, DOI 10.1186/s12890-017-0551-y
   Ho D, 2007, J STAT SOFTW, V42, P9
   Ho DE, 2007, POLIT ANAL, V15, P199, DOI 10.1093/pan/mpl013
   Kirwan ED, 2012, LANCET, V13, P102
   Lopes A, 2020, MED MALADIES INFECT, V50, P36, DOI 10.1016/j.medmal.2019.03.010
   Mugauri H, 2018, INT J INFECT DIS, V76, P6, DOI 10.1016/j.ijid.2018.07.012
   Okoli GN, 2014, BRIT J ANAESTH, V112, P13, DOI 10.1093/bja/aet290
   Olmos A, 2015, J MULTIDISCIPL EVALU, V11, P68
   R Development Core Team, 2010, R LANG ENV STAT COMP
   Reif LK, 2018, PUBLIC HEALTH ACTION, V8, P103, DOI 10.5588/pha.18.0021
   Republic of Uganda, 2018, MIN HLTH ANN HLTH SE
   Republic of Uganda, 2016, UG NAT TUB PREV SURV
   Republic of Uganda, 2019, ANN HLTH SECT PERF R
   Schmidt CO, 2008, INT J PUBLIC HEALTH, V53, P165, DOI 10.1007/s00038-008-7068-3
   Shiferaw MB, 2019, BMC HEALTH SERV RES, V19, DOI 10.1186/s12913-019-4056-7
   Smith JA, 2005, J ECONOMETRICS, V125, P305, DOI 10.1016/j.jeconom.2004.04.011
   Staffa SJ, 2018, ANESTH ANALG, V127, P1066, DOI 10.1213/ANE.0000000000002787
   Starks H, 2004, 8 ANN KATHL FOL PALL
   Tang TY, 2017, J INT MED RES, V45, P816, DOI 10.1177/0300060517698618
   Thavaneswaran A., PROPENSITY SCORE MAT
   Virenfeldt J, 2014, BMJ OPEN, V4, DOI 10.1136/bmjopen-2014-004818
   von Elm E, 2007, PREV MED, V45, P247, DOI [10.1016/j.ypmed.2007.08.012, 10.1371/journal.pmed.0040297, 10.1016/j.jclinepi.2007.11.008, 10.1371/journal.pmed.0040296, 10.2471/BLT.07.045120, 10.1016/S0140-6736(07)61602-X]
   World Health Organization, 2003, TREATM TUB GUID NAT, P313
   World Health Organization, 2011, SAM DAY DIAGN TUB MI
   World Health Organization, 2020, TUB KEY FACTS
   World Health Organization, 2017, GUIDELINES TREATMENT
   Yao XXI, 2017, JNCI-J NATL CANCER I, V109, DOI 10.1093/jnci/djw323
   Zawedde-Muyanja S, 2018, INT J TUBERC LUNG D, V22, P1475, DOI 10.5588/ijtld.17.0460
NR 35
TC 1
Z9 1
U1 0
U2 1
PU AMER SOC TROP MED & HYGIENE
PI MCLEAN
PA 8000 WESTPARK DR, STE 130, MCLEAN, VA 22101 USA
SN 0002-9637
EI 1476-1645
J9 AM J TROP MED HYG
JI Am. J. Trop. Med. Hyg.
PD OCT
PY 2020
VL 103
IS 4
BP 1447
EP 1454
DI 10.4269/ajtmh.19-0900
PG 8
WC Public, Environmental & Occupational Health; Tropical Medicine
WE Science Citation Index Expanded (SCI-EXPANDED)
SC Public, Environmental & Occupational Health; Tropical Medicine
GA OE9CC
UT WOS:000580818500026
PM 32783795
OA Green Published, Bronze
DA 2022-08-20
ER

PT J
AU Shakeel, K
   Iram, S
   Akhtar, M
   Hussain, S
   Maryam, H
   Anwar, A
AF Shakeel, Komal
   Iram, Shagufta
   Akhtar, Mehwish
   Hussain, Shahida
   Maryam, Hannana
   Anwar, Ambreen
TI Diagnostic validation of rapid molecular detection of Mycobacterium
   tuberculosis in pus samples by GeneXpert
SO JOURNAL OF THE PAKISTAN MEDICAL ASSOCIATION
LA English
DT Article
DE Mycobacterium tuberculosis (MTB); Lowenstein-Jensen (LJ) culture;
   Pulmonary tuberculosis (PTB); Ziehl-Neelsen (ZN) stain
ID XPERT MTB/RIF; EXTRAPULMONARY TUBERCULOSIS; RIFAMPIN RESISTANCE;
   SPECIMENS; PULMONARY; LYMPHADENITIS; ACCURACY
AB Objective: To evaluate the performance of GeneXpert for detection of mycobacterium tuberculosis in pus samples and compare its results with conventional techniques in terms of validity, rapidity and rifampicin resistance.
   Methods: This longitudinal, descriptive study was conducted at Jinnah Hospital, Lahore, Pakistan, from January 2012 to December 2015, and comprised pus samples of people suspected of having extra-pulmonary tuberculosis. Participants were included by using consecutive sampling technique. The pus samples were subjected to Ziehl-Neelsen smear microscopy and Lowenstein-Jensen culture as per World Health Organisation's protocol and GeneXpert as per manufacturer protocol. SPSS 17 was used for data analysis. Validity of GeneXpert and rifampicin resistance were determined and compared with Ziehl-Neelsen staining using Lowenstein-Jensen culture as the gold standard.
   Results: Of the 212 pus samples, 84(39.6%) were positive on Lowenstein-Jensen culture with mean turnaround time of 20 +/- 6 days, 77(36.3%) on GeneXpert and 22(10.4%) on Ziehl-Neelsen smear. The highest detection rate of mycobacterium tuberculosis 62(80.5%) was in lymph node samples by GeneXpert. The sensitivity and specificity of GeneXpert were 91.6% and 100% respectively, while Ziehl-Neelsen smear showed a sensitivity26.2% and specificity of 100%. Rifampicin resistance was detected in 5(6.4%) pus samples by GeneXpert.
   Conclusion: GeneXpert had a higher validity compared to Ziehl-Neelsen smear microscopy.
C1 [Shakeel, Komal; Iram, Shagufta; Akhtar, Mehwish; Maryam, Hannana; Anwar, Ambreen] Allama Iqbal Med Coll, Lahore, Pakistan.
   [Hussain, Shahida] Univ Punjab, Microbiol & Mol Genet, Lahore, Pakistan.
RP Shakeel, K (通讯作者)，Allama Iqbal Med Coll, Lahore, Pakistan.
EM komal_shakeel@outlook.com
CR Ahmed Parvez, 2005, JPMA Journal of the Pakistan Medical Association, V55, P378
   Batz H-G, 2011, LAB FREE TUBERCULOSI
   Behr MA, 1999, LANCET, V353, P444, DOI 10.1016/S0140-6736(98)03406-0
   Boehme CC, 2011, LANCET, V377, P1495, DOI 10.1016/S0140-6736(11)60438-8
   Boehme CC, 2010, NEW ENGL J MED, V363, P1005, DOI 10.1056/NEJMoa0907847
   Causse M, 2011, J CLIN MICROBIOL, V49, P3065, DOI 10.1128/JCM.00491-11
   Chandir S, 2010, J PAK MED ASSOC, V60, P105
   Chihota VN, 2010, INT J TUBERC LUNG D, V14, P1024
   Evans CA, 2011, PLOS MED, V8, DOI 10.1371/journal.pmed.1001064
   Fazal-i-Wahid, 2013, J PAK MED ASSOC, V63, P1094
   Ikram A, 2015, JCPSP-J COLL PHYSICI, V25, P417, DOI 06.2015/JCPSP.417421
   International Union against Tuberculosis and Lung Disease, 2000, SPUT EX TUB DIR MICR
   Iram S, 2015, PAK J MED SCI, V31, P105, DOI 10.12669/pjms.311.6970
   Ligthelm LJ, 2011, J CLIN MICROBIOL, V49, P3967, DOI 10.1128/JCM.01310-11
   Malbruny B, 2011, INT J TUBERC LUNG D, V15, P553, DOI 10.5588/ijtld.10.0497
   Marais BJ, 2006, PEDIATR INFECT DIS J, V25, P142, DOI 10.1097/01.inf.0000199259.04970.d1
   Pinto LM, 2013, THORAX, V68, P987, DOI 10.1136/thoraxjnl-2013-203885
   Raj A, 2012, IOSR J PHARM, V2, P83
   Scott LE, 2014, J CLIN MICROBIOL, V52, P1818, DOI 10.1128/JCM.03553-13
   Tortoli E, 2012, EUR RESPIR J, V40, P442, DOI 10.1183/09031936.00176311
   Vadwai V, 2011, J CLIN MICROBIOL, V49, P2540, DOI 10.1128/JCM.02319-10
   Van Rie A, 2010, EXPERT REV MOL DIAGN, V10, P937, DOI [10.1586/erm.10.67, 10.1586/ERM.10.67]
   [World Health Organization WHO], 2010, GLOB TUB CONTR
   Zeka AN, 2011, J CLIN MICROBIOL, V49, P4138, DOI 10.1128/JCM.05434-11
NR 24
TC 4
Z9 4
U1 0
U2 2
PU PAKISTAN MEDICAL ASSOC
PI KARACHI
PA PMA HOUSE, AGA KHAN III RD, KARACHI, 00000, PAKISTAN
SN 0030-9982
J9 J PAK MED ASSOC
JI J. Pak. Med. Assoc.
PD JAN
PY 2018
VL 68
IS 1
BP 33
EP 37
PG 5
WC Medicine, General & Internal; Medicine, Research & Experimental
WE Science Citation Index Expanded (SCI-EXPANDED)
SC General & Internal Medicine; Research & Experimental Medicine
GA FW3RT
UT WOS:000425227600008
PM 29371714
DA 2022-08-20
ER

PT J
AU Ahmad, S
   Afzal, S
   Ullah, A
   Sheed, A
AF Ahmad, Sajjad
   Afzal, Sumera
   Ullah, Aman
   Sheed, Anwar
TI Evaluation of GeneXpert MTB/RIF Assay for Detection of Pulmonary
   Tuberculosis on Sputum Samples
SO JCPSP-JOURNAL OF THE COLLEGE OF PHYSICIANS AND SURGEONS PAKISTAN
LA English
DT Article
DE GeneXpert; MTB/RIF assay; Pulmonary tuberculosis; Multi drug resistant
   tuberculosis
ID RESISTANCE; DIAGNOSIS
AB Objective: To analyse the diagnostic performance of MTB/RIF assay for the diagnosis of pulmonary tuberculosis and detection of rifampicin resistance using sputum samples.
   Study Design: Observational cross-sectional study.
   Place and Duration of Study: Provincial TB Reference Laboratory (PTRL), Hayatabad Medical Complex, Peshawar, Pakistan, from January to October 2015.
   Methodology: A total of 268 participants were consecutively enrolled in the study after meeting the inclusion criteria. Their sputum samples were collected and processed by N-acetyl-L-cysteine-sodium hydroxide (NALC-NaOH) method and GeneXpert MTB/RIF assay.
   Results: This study determined the overall sensitivity and specificity of MTB/RIF assay, it was 92.4% (86/93) and 97.1% (138/142), respectively. The sensitivity was 98.4% (60/61) in culture proven smear positive samples, whilst sensitivity in culture proven smear negative samples was 93.7% (30/32), using culture as reference standard.
   Conclusion: GeneXpert MTB/RIF assay could greatly improve early diagnosis of PTB in smear negative cases as well as multidrug resistant tuberculosis.
C1 [Ahmad, Sajjad] Khyber Med Univ, Inst Basic Med Sci, Peshawar, Pakistan.
   [Afzal, Sumera] Univ Peshawar, Ctr Biotechnol & Microbiol, Peshawar, Pakistan.
   [Ullah, Aman] Khyber Med Univ, Inst Paramed Sci, Peshawar, Pakistan.
   [Sheed, Anwar] Hayatabad Med Complex, Prov Reference Lab TB, Peshawar, Pakistan.
RP Ullah, A (通讯作者)，Khyber Med Univ, Inst Paramed Sci, Peshawar, Pakistan.
EM khurramthalwi@hotmail.com
CR Aurin TH, 2014, PLOS ONE, V9, DOI 10.1371/journal.pone.0099810
   Boehme CC, 2011, LANCET, V377, P1495, DOI 10.1016/S0140-6736(11)60438-8
   Boehme CC, 2010, NEW ENGL J MED, V363, P1005, DOI 10.1056/NEJMoa0907847
   Espinal MA, 2000, JAMA-J AM MED ASSOC, V283, P2537, DOI 10.1001/jama.283.19.2537
   Javaid Arshad, 2008, J Pak Med Assoc, V58, P437
   Marlowe EM, 2011, J CLIN MICROBIOL, V49, P1621, DOI 10.1128/JCM.02214-10
   Maru M, 2015, TUBERCULOSIS RES TRE, V2015, P1
   Pinyopornpanish K, 2015, TUBER RES TREAT, V2015
   Rachow A, 2011, PLOS ONE, V6, DOI 10.1371/journal.pone.0020458
   Sharma SK, 2015, PLOS ONE, V10, DOI 10.1371/journal.pone.0141011
   Shrestha P, 2015, TUBERCULOSIS RES TRE, V2015, P1
   WHO, 2010, GLOB TUB CONTR 2010
   Wilson ML, 2011, CLIN INFECT DIS, V52, P1350, DOI 10.1093/cid/cir146
   World Health Organisation, 2011, RAP IMPL XPERT MTB R
   World Health Organization Geneva, 2014, GLOB TUB CONTR WHO R
   Zeka AN, 2011, J CLIN MICROBIOL, V49, P4138, DOI 10.1128/JCM.05434-11
NR 16
TC 4
Z9 6
U1 1
U2 2
PU COLL PHYSICIANS & SURGEONS PAKISTAN
PI KARACHI
PA SEVENTH CENTRAL ST, DEFENCE HOUSING AUTHORITY, KARACHI, 75500, PAKISTAN
SN 1022-386X
EI 1681-7168
J9 JCPSP-J COLL PHYSICI
JI JCPSP-J. Coll. Physicians Surg.
PD JAN
PY 2019
VL 29
IS 1
BP 66
EP 69
DI 10.29271/jcpsp.2019.01.66
PG 4
WC Medicine, General & Internal
WE Science Citation Index Expanded (SCI-EXPANDED)
SC General & Internal Medicine
GA HH0UJ
UT WOS:000455434800017
PM 30630573
OA gold
DA 2022-08-20
ER

PT J
AU Saeed, M
   Iram, S
   Hussain, S
   Ahmed, A
   Akbar, M
   Aslam, M
AF Saeed, Muhammad
   Iram, Shagufta
   Hussain, Shahida
   Ahmed, Adeel
   Akbar, Mamoon
   Aslam, Maleeha
TI GeneXpert: A new tool for the rapid detection of rifampicin resistance
   in mycobacterium tuberculosis
SO JOURNAL OF THE PAKISTAN MEDICAL ASSOCIATION
LA English
DT Article
DE GeneXpert MTB/RIF assay; Mycobacterium tuberculosis; Rifampicin
   resistance; Drug susceptibility testing
ID XPERT MTB/RIF TEST; ASSAY; IMPLEMENTATION; DIAGNOSIS
AB Objective: To evaluate the diagnostic accuracy of GeneXpert assay for the detection of rifampicin resistance in mycobacterium tuberculosis using conventional drug susceptibility testing as gold standard.
   Methods: This cross-sectional study was conducted at Jinnah Hospital, Lahore, / Allama Iqbal Medical College, Lahore, Pakistan, from January 2012 to December 2014, and comprised clinically and radiologically diagnosed tuberculosis suspected cases. Pulmonary and extra-pulmonary specimens were collected from strong tuberculosis suspects. All specimens were processed for Ziehl Neelsen staining, Lowenstein-Jensen culture and GeneXpert assay. All mycobacterium tuberculosis positive cases on Lowenstein-Jensen culture were further processed for drug susceptibility testing.
   Results: Of the 2,200 cases, 840(49.46%) were positive for mycobacterium tuberculosis on GeneXpert assay. Of them, 134(15.6%) cases showed rifampicin resistance on GeneXpert assay. The sensitivity, specificity, positive predictive value and negative predictive value of GeneXpert assay for rifampicin resistance were 127(98.3%), 704(99.1%), 127(94.7%) and 704(99.4%), respectively, by comparing the results with drug susceptibility testing.
   Conclusion: GeneXpert assay was an extremely helpful diagnostic tool for the detection of rifampicin resistance in tuberculosis suspects with fairly high sensitivity and specificity along with short turnout time.
C1 [Saeed, Muhammad; Hussain, Shahida] Univ Hlth Sci, Dept Pathol, Lahore, Pakistan.
   [Akbar, Mamoon] Univ Hlth Sci, Allama Iqbal Med Coll, Dept Commun Med, Lahore, Pakistan.
   [Ahmed, Adeel] Univ Hlth Sci, Dept Microbiol, Lahore, Pakistan.
   [Aslam, Maleeha] Akhtar Saeed Med & Dent Coll, Dept Pathol, Lahore, Pakistan.
RP Saeed, M (通讯作者)，Univ Hlth Sci, Dept Pathol, Lahore, Pakistan.
EM mian.scientisit@yahoo.com
RI saeed, Mian Muhammad/R-5582-2019
OI saeed, Mian Muhammad/0000-0001-8602-0827
CR Armand S, 2011, J CLIN MICROBIOL, V49, P1772, DOI 10.1128/JCM.02157-10
   Boehme CC, 2011, LANCET, V377, P1495, DOI 10.1016/S0140-6736(11)60438-8
   Boehme CC, 2010, NEW ENGL J MED, V363, P1005, DOI 10.1056/NEJMoa0907847
   Cavusoglu C, 2002, J CLIN MICROBIOL, V40, P4435, DOI 10.1128/JCM.40.12.4435-4438.2002
   Chihota VN, 2010, INT J TUBERC LUNG D, V14, P1024
   Gutierrez-Lugo MT, 2008, J MED CHEM, V51, P2606, DOI 10.1021/jm070719i
   Helb D, 2010, J CLIN MICROBIOL, V48, P229, DOI 10.1128/JCM.01463-09
   International Union Against Tuberculosis and Lung Disease, 2000, SPUT EX TUB DIR MICR
   Ioannidis P, 2011, J CLIN MICROBIOL, V49, P3068, DOI 10.1128/JCM.00718-11
   Lawn SD, 2013, LANCET INFECT DIS, V13, P349, DOI 10.1016/S1473-3099(13)70008-2
   Lawn SD, 2011, FUTURE MICROBIOL, V6, P1067, DOI [10.2217/fmb.11.84, 10.2217/FMB.11.84]
   Marlowe EM, 2011, J CLIN MICROBIOL, V49, P1621, DOI 10.1128/JCM.02214-10
   Organization WH, 2010, GLOB TUB CONTR WHO R
   W. H. Organization, 2013, SAUDI MED J, V34, P1205
   Watterson SA, 1998, J CLIN MICROBIOL, V36, P1969, DOI 10.1128/JCM.36.7.1969-1973.1998
   Weyer K, 2013, EUR RESPIR J, V42, P252, DOI 10.1183/09031936.00157212
   Zumla A, 2013, LANCET, V382, P1765, DOI 10.1016/S0140-6736(13)62078-4
NR 17
TC 13
Z9 13
U1 0
U2 2
PU PAKISTAN MEDICAL ASSOC
PI KARACHI
PA PMA HOUSE, AGA KHAN III RD, KARACHI, 00000, PAKISTAN
SN 0030-9982
J9 J PAK MED ASSOC
JI J. Pak. Med. Assoc.
PD FEB
PY 2017
VL 67
IS 2
BP 270
EP 274
PG 5
WC Medicine, General & Internal; Medicine, Research & Experimental
WE Science Citation Index Expanded (SCI-EXPANDED)
SC General & Internal Medicine; Research & Experimental Medicine
GA EO9QI
UT WOS:000397022800023
PM 28138184
DA 2022-08-20
ER

PT J
AU Bajrami, R
   Mulliqi, G
   Kurti, A
   Lila, G
   Raka, L
AF Bajrami, Rrezarta
   Mulliqi, Gjyle
   Kurti, Arsim
   Lila, Greta
   Raka, Lul
TI Comparison of GeneXpert MTB/RIF and conventional methods for the
   diagnosis of tuberculosis in Kosovo
SO JOURNAL OF INFECTION IN DEVELOPING COUNTRIES
LA English
DT Article
DE tuberculosis; diagnosis; molecular
ID RAPID DIAGNOSIS; PROGRESS; ASSAY
AB Introduction: Tuberculosis (TB) is a major public health problem worldwide, with the highest mortality occurring in developing countries. The burden of TB in Kosovo is among the highest in Europe. The aim of this study was to compare Cepheid GeneXpert MTB/RIF assay for direct detection of Mycobacterium tuberculosis complex (MTBC) and rifampin (RIF) resistance with conventional methods.
   Methodology: A cross-sectional design to evaluate diagnostic tests was carried out at the Department of Microbiology, National Institute of Public Health of Kosovo and Lung Clinic, from January to June 2014. The detection of MTBC and RIF resistance using the Xpert MTB/RIF assay was assessed in 116 specimens received from 110 patients suspected of having TB and compared with conventional smear microscopy and culture methods.
   Results: Fifty-eight patients (52.7%) were male, and the mean age was 48.6 +/- 18.1 years. Twenty-nine patients (26.4%) had underlying lung diseases. Of the 116 specimens investigated, 28 (24.1%) were MTBC-positive by culture, while 34 (29.3%) were positive by Xpert assay. Two samples showed false-negative Xpert results. Compared with culture, the Xpert assay achieved 82.3% (95% CI: 65.5%-93.2%) sensitivity, and 97.6% (95% CI: 91.5%-99.7%) specificity. GeneXpert could detect 11.7% and 50% additional positive cases as compared to LowensteinJensen culture and smear microscopy, respectively. Three cases with resistance to rifampin were detected from clinical isolates.
   Conclusions: The GeneXpert MTB/RIF assay is a helpful tool for rapid diagnosis and prompt treatment of TB.
C1 [Raka, Lul] Natl Inst Publ Hlth Kosovo, Rrethi & Spitalit Pn, Prishina 10000, Kosovo.
   [Raka, Lul] Univ Prishtina, Rrethi & Spitalit Pn, Prishina 10000, Kosovo.
RP Raka, L (通讯作者)，Natl Inst Publ Hlth Kosovo, Rrethi & Spitalit Pn, Prishina 10000, Kosovo.; Raka, L (通讯作者)，Univ Prishtina, Rrethi & Spitalit Pn, Prishina 10000, Kosovo.
EM lul.raka@uni-pr.edu
RI Raka, Lul/A-8019-2016
CR Abubakar I, 2013, LANCET INFECT DIS, V13, P529, DOI 10.1016/S1473-3099(13)70030-6
   Al-Ateah SM, 2012, SAUDI MED J, V33, P1100
   Anonymous, 2009, Morbidity and Mortality Weekly Report, V58, P7
   Buwa D, 2007, EUR J PUBLIC HEALTH, V17, P226, DOI 10.1093/eurpub/ckl114
   Iram S, 2015, PAK J MED SCI, V31, P105, DOI 10.12669/pjms.311.6970
   Kurhasani X, 2012, ALBANIAN MED J, V4, P30
   Nathanson E, 2010, NEW ENGL J MED, V363, P1050, DOI 10.1056/NEJMra0908076
   Pai M, 2009, CLIN CHEST MED, V30, P701, DOI 10.1016/j.ccm.2009.08.016
   Peyffer GE, 2011, MANUAL CLIN MICROBIO, V1, P472, DOI DOI 10.1128/9781555816728.CH28
   Pinyopornpanish K, 2015, TUBER RES TREAT, V2015
   Raviglione M, 2012, LANCET, V379, P1902, DOI 10.1016/S0140-6736(12)60727-2
   Steingart KR, 2014, COCHRANE DB SYST REV, DOI [10.1002/14651858.CD009593.pub3, 10.1002/14651858.CD009593.pub2]
   Veen J, 2014, REV TUBERCULOSIS PRO
   WHO, 2014, GLOB TUB CONTR REP 2
   WHO, 2010, ROADM ROLL OUT XPERT
   Zeka AN, 2011, J CLIN MICROBIOL, V49, P4138, DOI 10.1128/JCM.05434-11
   Zumla A, 2013, NEW ENGL J MED, V368, P745, DOI 10.1056/NEJMra1200894
NR 17
TC 18
Z9 20
U1 0
U2 4
PU J INFECTION DEVELOPING COUNTRIES
PI TRAMANIGLIO
PA JIDC CENT OFF PORTO CONTE RICERCHE RES CTR, S P 55, PORTO CONTE CAPO
   CACCIA KM 8.400 LOC, TRAMANIGLIO, 07041, ITALY
SN 1972-2680
J9 J INFECT DEV COUNTR
JI J. Infect. Dev. Ctries.
PD APR
PY 2016
VL 10
IS 4
BP 418
EP 422
DI 10.3855/jidc.7569
PG 5
WC Infectious Diseases
WE Science Citation Index Expanded (SCI-EXPANDED)
SC Infectious Diseases
GA DQ5SL
UT WOS:000379265200017
PM 27131007
OA Green Submitted, gold
DA 2022-08-20
ER

PT J
AU Daum, LT
   Fourie, P
   Peters, R
   Rodriguez, J
   Worthy, S
   Khubbar, M
   Bhattacharyya, S
   Gradus, M
   Helm, C
   Fischer, G
AF Daum, L. T.
   Fourie, P.
   Peters, R.
   Rodriguez, J.
   Worthy, S.
   Khubbar, M.
   Bhattacharyya, S.
   Gradus, M.
   Helm, C.
   Fischer, G.
TI GeneXpert detection of mycobacterium tuberculosis from sputum collected
   and transported in a molecular transport medium
SO INTERNATIONAL JOURNAL OF INFECTIOUS DISEASES
LA English
DT Meeting Abstract
C1 [Daum, L. T.; Rodriguez, J.; Worthy, S.; Helm, C.; Fischer, G.] Longhorn Vaccines & Diagost, San Antonio, TX USA.
   [Fourie, P.; Peters, R.] Univ Pretoria, ZA-0002 Pretoria, South Africa.
   [Khubbar, M.; Bhattacharyya, S.; Gradus, M.] City Milwaukee Publ Hlth, Milwaukee, WI USA.
RI FOURIE, Bernard/AAX-3457-2020; Bhattacharyya, Sanjib/AAX-4147-2020
OI FOURIE, Bernard/0000-0002-1630-3554; 
NR 0
TC 2
Z9 2
U1 0
U2 0
PU ELSEVIER SCI LTD
PI OXFORD
PA THE BOULEVARD, LANGFORD LANE, KIDLINGTON, OXFORD OX5 1GB, OXON, ENGLAND
SN 1201-9712
EI 1878-3511
J9 INT J INFECT DIS
JI Int. J. Infect. Dis.
PD APR
PY 2016
VL 45
SU 1
MA 43.102
BP 392
EP 393
DI 10.1016/j.ijid.2016.02.840
PG 2
WC Infectious Diseases
WE Science Citation Index Expanded (SCI-EXPANDED)
SC Infectious Diseases
GA DK4GZ
UT WOS:000374876700784
OA gold
DA 2022-08-20
ER

PT J
AU de Faria, MGBF
   Andrade, RLD
   Camillo, AJG
   Leite, KFD
   Saita, NM
   Bollela, VR
   de Rezende, CEM
   Monroe, AA
AF Botelho Funari de Faria, Mariana Gaspar
   Andrade, Rubia Laine de Paula
   Goncalves Camillo, Ana Julia
   de Souza Leite, Karina Fonseca
   Saita, Nanci Michele
   Bollela, Valdes Roberto
   Menezes de Rezende, Carlos Eduardo
   Monroe, Aline Aparecida
TI Effectiveness of GeneXpert (R) in the diagnosis of tuberculosis in
   people living with HIV/AIDS
SO REVISTA DE SAUDE PUBLICA
LA English
DT Review
DE Tuberculosis; Pulmonary; diagnosis; Molecular Diagnostic Techniques; HIV
   Infections; AIDS-Related Opportunistic Infections
ID XPERT MTB/RIF ASSAY; NEGATIVE PULMONARY TUBERCULOSIS; RAPID
   MOLECULAR-DETECTION; HIV-INFECTED PATIENTS; MYCOBACTERIUM-TUBERCULOSIS;
   RESISTANCE; PREVALENCE; SETTINGS
AB OBJECTIVE: To identify and synthesize the scientific knowledge produced regarding the effectiveness of the GeneXpert test in the diagnosis of pulmonary tuberculosis (TB) in people living with HIV/AIDS.
   METHODS: Integrative literature review, which was searched on Embase, Scopus, PubMed, Cinahl, Academic Search Premier, Socindex, and LILACS platforms, in December 2019. The studies surveyed went through two stages of selection: reading of titles and abstracts by two reviewers independently; using the Rayyan platform and reading. Nineteen primary studies in English, Portuguese, and Spanish that answered the study's guiding question were included: How effective is the GeneXpert test in the diagnosis ofpulmonary TB in people living with HIV/AIDS?
   RESULTS: The use of GeneXpert substantially increased the detection of TB cases among the population co-infected with HIV/AIDS, with sensitivity ranging from 68% to 100%, superior to sputum smear microscopy. Specificity ranged from 91.7% to 100%; the positive predictive value from 79.2% to 96.1%; and the negative predictive value from 84.6% to 99.3%. These values were considered similar to sputum smear microscopy by most studies. We also compared these results with different ways of performing culture and other molecular tests, being considered inferior only to the Xpert Ultra.
   CONCLUSION: It is possible to affirm that places with a high incidence of HIV/AIDS would benefit from the implementation of the GeneXpert test, entailing effectiveness in diagnosing pulmonary TB in this population when compared to sputum smear microscopy, a widely used test for detection of cases.
C1 [Botelho Funari de Faria, Mariana Gaspar; Goncalves Camillo, Ana Julia; de Souza Leite, Karina Fonseca; Saita, Nanci Michele; Menezes de Rezende, Carlos Eduardo] Univ Sao Paulo, Escola Enfermagem Ribeirao Preto, Programa Posgrad Saude Publ, Ribeirao Preto, SP, Brazil.
   [Andrade, Rubia Laine de Paula; Monroe, Aline Aparecida] Univ Sao Paulo, Escola Enfermagem Ribeirao Preto, Dept Maternoinfantil & Saude Publ, Av Bandeirantes,3-900 Campus Univ, BR-14026590 Ribeirao Preto, SP, Brazil.
   [Bollela, Valdes Roberto] Univ Sao Paulo, Fac Med Ribeirao Preto, Dept Clin Med, Ribeirao Preto, SP, Brazil.
   [Bollela, Valdes Roberto] Univ Sao Paulo, Div Molestias Infecciosas, Ribeirao Preto, SP, Brazil.
   [Menezes de Rezende, Carlos Eduardo] Minist Saude, Agencia Nacl Saude Suplementar, Rio De Janeiro, RJ, Brazil.
RP Monroe, AA (通讯作者)，Univ Sao Paulo, Escola Enfermagem Ribeirao Preto, Dept Maternoinfantil & Saude Publ, Av Bandeirantes,3-900 Campus Univ, BR-14026590 Ribeirao Preto, SP, Brazil.
EM amonroe@eerp.usp.br
FU Coordenacao de Aperfeicoamento de Pessoal de Nivel Superior - Brazil
   (Capes) [001]; Conselho Nacional de Desenvolvimento Cientifico e
   Tecnologico (CNPq) [304517/2018-6]
FX This work was carried out with the support of the Coordenacao de
   Aperfeicoamento de Pessoal de Nivel Superior - Brazil (Capes - Financing
   Code 001). Conselho Nacional de Desenvolvimento Cientifico e Tecnologico
   (CNPq - Research productivity fellowship - process 304517/2018-6).
CR Akanbi MO, 2017, BMC PULM MED, V17, DOI 10.1186/s12890-017-0430-6
   [Anonymous], 2014, GLOB TUB REP 2014
   Ardizzoni E, 2015, PLOS ONE, V10, DOI 10.1371/journal.pone.0144656
   Arora D, 2015, J CLIN DIAGN RES, V9, pDC3, DOI 10.7860/JCDR/2015/11352.5935
   Auld SC, 2014, PUBLIC HEALTH ACTION, V4, P216, DOI 10.5588/pha.14.0082
   Balcells ME, 2012, INT J TUBERC LUNG D, V16, P1349, DOI 10.5588/ijtld.12.0156
   Balcha TT, 2014, PLOS ONE, V9, DOI 10.1371/journal.pone.0085478
   Bassett IV, 2010, CLIN INFECT DIS, V51, P823, DOI 10.1086/656282
   Boehme CC, 2010, NEW ENGL J MED, V363, P1005, DOI 10.1056/NEJMoa0907847
   Cavanaugh JS, 2016, PLOS ONE, V11, DOI 10.1371/journal.pone.0152364
   Chakravorty S, 2017, MBIO, V8, DOI [10.1128/mBio.00812-17, 10.1128/mbio.00812-17]
   Churchyard GJ, 2015, LANCET GLOB HEALTH, V3, pE450, DOI 10.1016/S2214-109X(15)00100-X
   Dagnra A. Y., 2015, New Microbes and New Infections, V8, P24, DOI 10.1016/j.nmni.2015.09.001
   Dewan R, 2015, JIACM, V16, P114
   Dorman SE, 2018, LANCET INFECT DIS, V18, P76, DOI [10.1016/S1473-3099(17)30691-6, 10.1016/s1473-3099(17)30691-6]
   Getahun H, 2007, LANCET, V369, P2042, DOI 10.1016/S0140-6736(07)60284-0
   Griesel R, 2018, CLIN INFECT DIS, V66, P1419, DOI 10.1093/cid/cix988
   Harries AD, 2010, LANCET, V375, P1906, DOI 10.1016/S0140-6736(10)60409-6
   Helb D, 2010, J CLIN MICROBIOL, V48, P229, DOI 10.1128/JCM.01463-09
   Iram S, 2015, PAK J MED SCI, V31, P105, DOI 10.12669/pjms.311.6970
   Lawn SD, 2012, CLIN INFECT DIS, V54, P1071, DOI 10.1093/cid/cir1039
   Lawn SD, 2011, J INFECT DIS, V204, pS1159, DOI 10.1093/infdis/jir411
   Lawn SD, 2011, PLOS MED, V8, DOI 10.1371/journal.pmed.1001067
   Mboma SM, 2013, PLOS ONE, V8, DOI 10.1371/journal.pone.0058192
   Mbu ET, 2018, PLOS ONE, V13, DOI 10.1371/journal.pone.0199634
   Mederos Cuervo LM, 2018, AVFT ARCH VENEZ FARM, V37, P355
   Moher David, 2009, Ann Intern Med, V151, P264, DOI 10.1136/bmj.b2535
   Mollel EW, 2017, TANZAN J HLTH RES, V19, P1, DOI [10.4314/thrb.v19i1.1, DOI 10.4314/THRB.V19I1.1]
   Moreira WB, 2016, LEITURA CRITICA ARTI, P83
   O'Grady J, 2012, CLIN INFECT DIS, V55, P1171, DOI 10.1093/cid/cis631
   Ouzzani M, 2016, SYST REV-LONDON, V5, DOI 10.1186/s13643-016-0384-4
   Palomino JC, 2009, FEMS IMMUNOL MED MIC, V56, P103, DOI 10.1111/j.1574-695X.2009.00555.x
   Rachow A, 2011, PLOS ONE, V6, DOI 10.1371/journal.pone.0020458
   Rawat J, 2012, J INFECT DEV COUNTR, V6, P20
   Scott LE, 2011, PLOS MED, V8, DOI 10.1371/journal.pmed.1001061
   Ssengooba W, 2014, PLOS ONE, V9, DOI 10.1371/journal.pone.0107595
   Steingart KR, 2014, COCHRANE DB SYST REV, DOI [10.1002/14651858.CD009593.pub3, 10.1002/14651858.CD009593.pub2]
   Sumangala V, 2017, J INT MED DENT, V4, P56, DOI [10.18320/JIMD/201704.0256, DOI 10.18320/JIMD/201704.0256]
   The Joanna Briggs Institute, 2017, CRIT APPR TOOLS US J
   Theron G, 2011, AM J RESP CRIT CARE, V184, P132, DOI 10.1164/rccm.201101-0056OC
   Ursi ES, 2005, THESIS
   Vittor AY, 2014, ANN GLOB HEALTH, V80, P476, DOI 10.1016/j.aogh.2015.01.001
   Whittemore R, 2005, J ADV NURS, V52, P546, DOI 10.1111/j.1365-2648.2005.03621.x
   WHO, 2012, GLOBAL TUBERCULOSIS REPORT 2012, P1
   World Health Organization, 2016, GLOB TUB REP 2016
   World Health Organization, 2010, TUB DIAGN AUT DNA TE
   World Health Organization, 2011, AUT REAL TIM NUCLAC
   World Health Organization, 2013, AUT REALT NUCL AC AM
   World Health Organization.4, 2010, ROADMAP ROLLING OUT
NR 49
TC 0
Z9 0
U1 0
U2 0
PU REVISTA DE SAUDE PUBLICA
PI SAO PAULO
PA FACULDADE SAUDE PUBL DA USP, AV DR ARNALDO 715, 01246-904SP SAO PAULO,
   BRAZIL
SN 0034-8910
EI 1518-8787
J9 REV SAUDE PUBL
JI Rev. Saude Publica
PY 2021
VL 55
AR 89
DI 10.11606/s1518-8787.2021055003125
PG 17
WC Public, Environmental & Occupational Health
WE Science Citation Index Expanded (SCI-EXPANDED); Social Science Citation Index (SSCI)
SC Public, Environmental & Occupational Health
GA YP8BR
UT WOS:000748845500001
PM 34932706
OA gold, Green Published
DA 2022-08-20
ER

PT J
AU Osman, M
   Simpson, JA
   Caldwell, J
   Bosman, M
   Nicol, MP
AF Osman, Muhammad
   Simpson, John A.
   Caldwell, Judy
   Bosman, Marlein
   Nicol, Mark P.
TI GeneXpert MTB/RIF Version G4 for Identification of Rifampin-Resistant
   Tuberculosis in a Programmatic Setting
SO JOURNAL OF CLINICAL MICROBIOLOGY
LA English
DT Article
ID MYCOBACTERIUM-TUBERCULOSIS
AB A recent Cochrane review estimated GeneXpert MTB/RIF specificity for rifampin resistance as 98% (95% confidence interval [CI], 97 to 99), based on results from earlier test versions. The measured positive predictive value of the new generation test from programmatic implementation in Cape Town, South Africa, was 99.5% (95% CI, 98.5 to 100), confirming excellent specificity.
C1 [Osman, Muhammad; Caldwell, Judy] City Hlth Directorate, Cape Town, South Africa.
   [Simpson, John A.; Bosman, Marlein; Nicol, Mark P.] Natl Hlth Lab Serv, Cape Town, South Africa.
   [Simpson, John A.] Univ Cape Town, ZA-7925 Cape Town, South Africa.
   [Nicol, Mark P.] Univ Cape Town, Natl Div Med Microbiol, ZA-7925 Cape Town, South Africa.
   [Nicol, Mark P.] Univ Cape Town, Inst Infect Dis & Mol Med, ZA-7925 Cape Town, South Africa.
RP Osman, M (通讯作者)，City Hlth Directorate, Cape Town, South Africa.
EM muhammad.osman@capetown.gov.za
RI Osman, Muhammad/ADC-7568-2022; Trajman, Anete/C-7679-2016; Osman,
   Muhammad/AAW-1530-2021; Nicol, Mark/W-4149-2019
OI Osman, Muhammad/0000-0003-3818-9729; Trajman, Anete/0000-0002-4000-4984;
   Nicol, Mark/0000-0002-1366-4805
FU Wellcome Trust [085251/B/08/Z]; Foundation for Innovative New
   Diagnostics (FIND, Geneva, Switzerland)
FX We acknowledge the Wellcome Trust (085251/B/08/Z) for support to M.P.N.;
   M.P.N. has received funding from the Foundation for Innovative New
   Diagnostics (FIND, Geneva, Switzerland) to conduct studies to evaluate
   the performance and impact of MTB/RIF. All other authors have indicated
   no conflict of interest.
CR Boehme CC, 2011, LANCET, V377, P1495, DOI 10.1016/S0140-6736(11)60438-8
   Foundation for Innovative New Diagnostics, 2011, FIND REP PERF XPERT
   Rigouts L, 2013, J CLIN MICROBIOL, V51, P2641, DOI 10.1128/JCM.02741-12
   Steingart KR, 2013, COCHRANE DB SYST REV, DOI 10.1002/14651858.CD009593.pub2
   Van Deun A, 2013, J CLIN MICROBIOL, V51, P2633, DOI 10.1128/JCM.00553-13
   WHO, 2011, POL STAT AUT REAL TI
   Williamson DA, 2012, DIAGN MICR INFEC DIS, V74, P207, DOI 10.1016/j.diagmicrobio.2012.06.013
   World Health Organization, WHO MON XPERT MTB RI
NR 8
TC 24
Z9 26
U1 0
U2 9
PU AMER SOC MICROBIOLOGY
PI WASHINGTON
PA 1752 N ST NW, WASHINGTON, DC 20036-2904 USA
SN 0095-1137
EI 1098-660X
J9 J CLIN MICROBIOL
JI J. Clin. Microbiol.
PD FEB
PY 2014
VL 52
IS 2
BP 635
EP 637
DI 10.1128/JCM.02517-13
PG 3
WC Microbiology
WE Science Citation Index Expanded (SCI-EXPANDED)
SC Microbiology
GA 300DI
UT WOS:000330444200038
PM 24478501
OA Green Published, Green Accepted, hybrid
DA 2022-08-20
ER

PT J
AU Pang, Y
   Lu, J
   Su, BY
   Zheng, HW
   Zhao, YL
AF Pang, Yu
   Lu, Jie
   Su, Biyi
   Zheng, Huiwen
   Zhao, Yanlin
TI Misdiagnosis of tuberculosis associated with some species of
   nontuberculous mycobacteria by GeneXpert MTB/RIF assay
SO INFECTION
LA English
DT Article
DE Mycobacterium tuberculosis; GeneXpert; Nontuberculous mycobacteria
ID DRUG SUSCEPTIBILITY; RIFAMPIN RESISTANCE; TOOLS
AB Out of 12 nontuberculous mycobacteria (NTM) species, 5 were identified as Mycobacterium tuberculosis (MTB) by GeneXpert at a bacterial load of 10(6). Notably, two species, including M. abscessus and M. smegmatis, were flagged as RIF-resistant MTB due to the high C(t) value of Probe E. In conclusion, our data have demonstrated that the misdiagnosis of MTB by GeneXpert assay is observed in five NTM species at a high bacterial load.
C1 [Pang, Yu] Capital Med Univ, Natl TB Clin Lab, Beijing Key Lab Drug Resistance TB Res, Beijing TB & Thorac Tumor Res Ins,Beijing Chest, 97 Machang, Beijing 101149, Peoples R China.
   [Lu, Jie] Capital Med Univ, Beijing Key Lab Pediat Dis Otolaryngol Head & Nec, Beijing Pediat Res Inst, Beijing Childrens Hosp, Beijing, Peoples R China.
   [Su, Biyi] Guangzhou Chest Hosp, Dept Clin Lab, State Key Lab Resp Dis, Guangzhou, Guangdong, Peoples R China.
   [Zheng, Huiwen; Zhao, Yanlin] Chinese Ctr Dis Control & Prevent, Natl Ctr TB Control & Prevent, 155 Chang Bai Rd, Beijing 102206, Peoples R China.
RP Pang, Y (通讯作者)，Capital Med Univ, Natl TB Clin Lab, Beijing Key Lab Drug Resistance TB Res, Beijing TB & Thorac Tumor Res Ins,Beijing Chest, 97 Machang, Beijing 101149, Peoples R China.; Zhao, YL (通讯作者)，Chinese Ctr Dis Control & Prevent, Natl Ctr TB Control & Prevent, 155 Chang Bai Rd, Beijing 102206, Peoples R China.
EM pangyu@chinatb.org; zhaoyanlin@chinatb.org
RI Rahman, Hazir/Q-8976-2019
OI Rahman, Hazir/0000-0002-6572-8428
FU Major State Basic Research Development Program of China [2014CB744403];
   National Natural Science Foundation of China [81401739]
FX This work was supported by the Major State Basic Research Development
   Program of China (2014CB744403) and the National Natural Science
   Foundation of China (81401739).
CR [Anonymous], 2013, XPERT MTBRIF ASS DIA
   Boehme CC, 2010, NEW ENGL J MED, V363, P1005, DOI 10.1056/NEJMoa0907847
   Drobniewski F, 2012, INT J TUBERC LUNG D, V16, P860, DOI 10.5588/ijtld.12.0180
   Helb D, 2010, J CLIN MICROBIOL, V48, P229, DOI 10.1128/JCM.01463-09
   Hillemann D, 2011, J CLIN MICROBIOL, V49, P1202, DOI 10.1128/JCM.02268-10
   Lee H, 2003, J CLIN MICROBIOL, V41, P2213, DOI 10.1128/JCM.41.5.2213-2218.2003
   Mougari F, 2016, EXPERT REV ANTI-INFE, V14, P1139, DOI 10.1080/14787210.2016.1238304
   Moure R, 2011, J CLIN MICROBIOL, V49, P1137, DOI 10.1128/JCM.01831-10
   Pang Y, 2013, ANTIMICROB AGENTS CH, V57, P893, DOI 10.1128/AAC.01024-12
   Theron G, 2014, SCI REP-UK, V4, DOI 10.1038/srep05658
   Theron G, 2012, CLIN INFECT DIS, V54, P384, DOI 10.1093/cid/cir824
   Tiberi S, 2014, EUR RESPIR J, V43, P289, DOI 10.1183/09031936.00122313
   World Health Organization, 2004, TOM TUB CAS DET TREA
   Zhang ZJ, 2015, INT J ANTIMICROB AG, V45, P491, DOI 10.1016/j.ijantimicag.2015.01.012
   Zhang ZJ, 2014, ANTIMICROB AGENTS CH, V58, P5632, DOI 10.1128/AAC.02778-14
NR 15
TC 7
Z9 7
U1 0
U2 6
PU SPRINGER HEIDELBERG
PI HEIDELBERG
PA TIERGARTENSTRASSE 17, D-69121 HEIDELBERG, GERMANY
SN 0300-8126
EI 1439-0973
J9 INFECTION
JI Infection
PD OCT
PY 2017
VL 45
IS 5
BP 677
EP 681
DI 10.1007/s15010-017-1044-x
PG 5
WC Infectious Diseases
WE Science Citation Index Expanded (SCI-EXPANDED)
SC Infectious Diseases
GA FJ1BK
UT WOS:000412446500013
PM 28707184
DA 2022-08-20
ER

PT J
AU Baker, BJ
   Holtom, PD
AF Baker, Brian J.
   Holtom, Paul D.
TI Additional Benefits of GeneXpert MTB/RIF Assay for the Evaluation of
   Pulmonary Tuberculosis Among Inpatients
SO CLINICAL INFECTIOUS DISEASES
LA English
DT Letter
ID MYCOBACTERIUM-TUBERCULOSIS; UNITED-STATES; TRANSMISSION
C1 [Baker, Brian J.] Ctr Dis Control & Prevent, Div TB Eliminat, Atlanta, GA 30329 USA.
   [Holtom, Paul D.] Univ So Calif, Med Ctr, Div Infect Dis, Los Angeles Cty Univ Southern Calif, Los Angeles, CA 90089 USA.
RP Baker, BJ (通讯作者)，Ctr Dis Control & Prevent, Div TB Eliminat, 1600 Clifton Rd,MS E-10, Atlanta, GA 30329 USA.
EM bjbaker@cdc.gov
CR Behr MA, 1999, LANCET, V353, P444, DOI 10.1016/S0140-6736(98)03406-0
   Chaisson LH, 2014, CLIN INFECT DIS, V59, P1353, DOI 10.1093/cid/ciu620
   Iademarco MF, 2013, MMWR-MORBID MORTAL W, V62, P821
   Lippincott CK, 2014, CLIN INFECT DIS, V59, DOI 10.1093/cid/ciu212
   Luetkemeyer A, 2014, INT AIDS C MELB AUST
   O'Shea MK, 2014, CLIN INFECT DIS, V59, P177, DOI 10.1093/cid/ciu244
   Shah NS, 2012, INT J TUBERC LUNG D, V16, P1234, DOI 10.5588/ijtld.11.0794
   Steingart KR, 2014, COCHRANE DB SYST REV, DOI [10.1002/14651858.CD009593.pub3, 10.1002/14651858.CD009593.pub2]
NR 8
TC 4
Z9 4
U1 0
U2 1
PU OXFORD UNIV PRESS INC
PI CARY
PA JOURNALS DEPT, 2001 EVANS RD, CARY, NC 27513 USA
SN 1058-4838
EI 1537-6591
J9 CLIN INFECT DIS
JI Clin. Infect. Dis.
PD APR 15
PY 2015
VL 60
IS 8
BP 1287
EP U214
DI 10.1093/cid/civ006
PG 2
WC Immunology; Infectious Diseases; Microbiology
WE Science Citation Index Expanded (SCI-EXPANDED)
SC Immunology; Infectious Diseases; Microbiology
GA CH0MX
UT WOS:000353715600029
PM 25586683
OA Bronze
DA 2022-08-20
ER

PT J
AU Sagili, KD
   Muniyandi, M
   Nilgiriwala, KS
   Shringarpure, KS
   Satyanarayana, S
   Kirubakaran, R
   Chadha, SS
   Tharyan, P
AF Sagili, Karuna D.
   Muniyandi, Malaisamy
   Nilgiriwala, Kayzad Soli
   Shringarpure, Kalpita S.
   Satyanarayana, Srinath
   Kirubakaran, Richard
   Chadha, Sarabjit S.
   Tharyan, Prathap
TI Cost-effectiveness of GeneXpert and LED-FM for diagnosis of pulmonary
   tuberculosis: A systematic review
SO PLOS ONE
LA English
DT Review
ID XPERT MTB/RIF; FLUORESCENCE MICROSCOPY; ZIEHL-NEELSEN; ASSAY
AB Background
   Early and accurate diagnosis of tuberculosis is a priority for TB programs globally to initiate treatment early and improve treatment outcomes. Currently, Ziehl-Neelsen (ZN) stainbased microscopy, GeneXpert and Light Emitting Diode-Fluorescence Microscopy (LED-FM) are used for diagnosing pulmonary drug sensitive tuberculosis. Published evidence synthesising the cost-effectiveness of these diagnostic tools is scarce.
   Methodology
   PubMed, EMBASE and Cost-effectiveness analysis registry were searched for studies that reported on the cost-effectiveness of GeneXpert and LED-FM, compared to ZN microscopy for diagnosing pulmonary TB. Risk of bias was assessed independently by four authors using the Consensus Health Economic Criteria (CHEC) extended checklist. The data variables included the study settings, population, type of intervention, type of comparator, year of study, duration of study, type of study design, costs for the test and the comparator and effectiveness indicators. Incremental cost-effectiveness ratio (ICER) was used for assessing the relative cost-effectiveness in this review.
   Results
   Of the 496 studies identified by the search, thirteen studies were included after removing duplicates and studies that did not fulfil inclusion criteria. Four studies compared LED-FM with ZN and nine studies compared GeneXpert with ZN. Three studies used patient cohorts and eight were modelling studies with hypothetical cohorts used to evaluate cost-effectiveness. All these studies were conducted from a health system perspective, with four studies utilising cost utility analysis. There were considerable variations in costing parameters and effectiveness indicators that precluded meta-analysis. The key findings from the included studies suggest that LED-FM and GeneXpert may be cost effective for pulmonary TB diagnosis from a health system perspective.
   Conclusion
   Our review identifies a consistent trend of the cost effectiveness of LED-FM and GeneXpert for pulmonary TB diagnosis in different countries with diverse context of socio-economic condition, HIV burden and geographical distribution. However, all the studies used different parameters to estimate the impact of these tools and this underscores the need for improving the methodological issues related to the conduct and reporting of cost-effectiveness studies.
C1 [Sagili, Karuna D.; Satyanarayana, Srinath; Chadha, Sarabjit S.] Int Union TB & Lung Dis, South East Asia Reg Off, New Delhi, India.
   [Muniyandi, Malaisamy] Natl Inst Res TB, ICMR, Madras, Tamil Nadu, India.
   [Nilgiriwala, Kayzad Soli] Fdn Med Res, TB Div, Bombay, Maharashtra, India.
   [Shringarpure, Kalpita S.] Med Coll Baroda, Dept Prevent & Social Med, Baroda, Gujarat, India.
   [Kirubakaran, Richard; Tharyan, Prathap] Christian Med Coll & Hosp, Prof BV Moses Ctr Evidence Informed Hlth Care, Vellore, Tamil Nadu, India.
RP Sagili, KD (通讯作者)，Int Union TB & Lung Dis, South East Asia Reg Off, New Delhi, India.
EM drkarunas@gmail.com
RI Kirubakaran, Richard/AAI-5947-2021; Muniyandi, Malaisamy/AAF-2076-2021;
   SOUNDRARAJAN, JOYSON/I-1779-2019
OI Kirubakaran, Richard/0000-0002-5799-0303; Satyanarayana,
   Srinath/0000-0002-5420-2551
FU U.S. Agency for International Development (USAID)
   [AID-GHN-A-00-08-00004]
FX This work is supported by USAID (https://www.usaid.gov); Award No:
   AID-GHN-A-00-08-00004. The funders had no role in study design, data
   collection and analysis, decision to publish, or preparation of the
   manuscript.; The review was conducted as a part of the training course
   aimed to build capacity on undertaking Systematic Reviews within India,
   especially in the context of tuberculosis. The training project was
   conceived and implemented by the South East Asia office of The
   International Union against Tuberculosis and Lung Diseases (The Union)
   in collaboration with Central TB Division, Ministry of Health and Family
   Welfare, Government of India and The Cochrane South Asia. The training
   was generously supported by U.S. Agency for International Development
   (USAID). We also thank Dr. Nandini Dendukuri, Department of Health
   Technology Assessment, McGill University, Canada for her inputs during
   protocol development.
CR Andrews JR, 2012, AIDS, V26, P987, DOI 10.1097/QAD.0b013e3283522d47
   Catala-Lopez F, 2016, SYST REV-LONDON, V5, DOI 10.1186/s13643-015-0181-5
   Central TB Division, 2017, TB IND 2017 ANN STAT
   Dinnes J, 2007, SYSTEMATIC REV RAPID, V11
   Jha S, 2016, PLOS ONE, V11, DOI 10.1371/journal.pone.0157554
   Kanabus A, 2017, INFORM TUBERCULOSIS
   Kaur R, 2016, J GLOB INFECT DIS, V8, P32, DOI 10.4103/0974-777X.176143
   Kelly V, 2015, INT J TUBERC LUNG D, V19, P696, DOI 10.5588/ijtld.14.0203
   Laokri S, 2013, PLOS ONE, V8, DOI 10.1371/journal.pone.0056752
   Liberati A, 2009, PLOS MED, V6, DOI [10.1371/journal.pmed.1000100, 10.7326/0003-4819-151-4-200908180-00136, 10.1136/bmj.b2700]
   Menzies NA, 2012, PLOS MED, V9, DOI 10.1371/journal.pmed.1001347
   Millman AJ, 2013, PLOS ONE, V8, DOI 10.1371/journal.pone.0079669
   Mishra L, 2012, INT J INFECT DIS, V16, pE286, DOI 10.1016/j.ijid.2012.05.957
   Molicotti P, 2014, J INFECT DEV COUNTR, V8, P24, DOI 10.3855/jidc.3295
   Odnoletkova I, 2014, J DIABETES METAB, V5, DOI 10.4172/2155-6156.1000438
   Ouzzani M, 2016, SYST REV-LONDON, V5, DOI 10.1186/s13643-016-0384-4
   Pang F, 1999, USE METAANALYSIS EC
   Pinto M, 2016, INT J TUBERC LUNG D, V20, P611, DOI 10.5588/ijtld.15.0455
   Reynolds MR, 2012, J AM COLL CARDIOL, V60, P2683, DOI 10.1016/j.jacc.2012.09.018
   Sagili K, 2016, PROSPERO
   Sohn H, 2009, INT J TUBERC LUNG D, V13, P266
   Tesfaye A, 2017, BMC INFECT DIS, V17, DOI 10.1186/s12879-017-2417-6
   The Cochrane Library, COCHRANE DATABASE SY
   Trajman A, 2015, PLOS ONE, V10, DOI 10.1371/journal.pone.0123252
   Tufts Medical Center, COST EFF AN REG
   Vassall A, 2017, LANCET GLOB HEALTH, V5, pE710, DOI [10.1016/S2214-109X(17)30205-X, 10.1016/s2214-109x(17)30205-x]
   Whitelaw A, 2011, EUR RESPIR J, V38, P1393, DOI 10.1183/09031936.00023211
   WHO, 2011, AUT REAL TIM NUCL AC
   WHO Guidelines Approved by the Guidelines Review Committee, 2014, XPERT MTB RIF IMPL M
   Wong CKH, 2017, VACCINE, V35, P3153, DOI 10.1016/j.vaccine.2017.04.050
   World Health Organization, 2010, WHO END NEW RAD TUB
   World Health Organization, 2015, POL FRAM
   World Health Organization, 2015, GLOB TUB REP 2015
   World Health Organization, 2016, GLOB TUB REP 2016
   World Health Organization, 2011, FLUOR LIGHT EM DIOD
   World Health Organization, 2011, EARL DET TUB OV APPR
   World Health Organization, 2015, GEAR END TB INTR END
   World Health Organization Regional Office for South East Asia, 2015, SCAL TB CONTR IN REA
   Xia H, 2013, INT J TUBERC LUNG D, V17, P107, DOI 10.5588/ijtld.12.0184
   Yan LP, 2016, TUBERCULOSIS, V96, P75, DOI 10.1016/j.tube.2015.11.005
   You JHS, 2015, J INFECTION, V70, P409, DOI 10.1016/j.jinf.2014.12.015
NR 41
TC 10
Z9 10
U1 1
U2 1
PU PUBLIC LIBRARY SCIENCE
PI SAN FRANCISCO
PA 1160 BATTERY STREET, STE 100, SAN FRANCISCO, CA 94111 USA
SN 1932-6203
J9 PLOS ONE
JI PLoS One
PD OCT 29
PY 2018
VL 13
IS 10
AR e0205233
DI 10.1371/journal.pone.0205233
PG 16
WC Multidisciplinary Sciences
WE Science Citation Index Expanded (SCI-EXPANDED)
SC Science & Technology - Other Topics
GA GY5SG
UT WOS:000448641200007
PM 30372436
OA gold, Green Published, Green Submitted
DA 2022-08-20
ER

PT J
AU Adriana, M
   Muntean, AA
   Popa, MI
AF Adriana, Moisoiu
   Muntean, Andrei-Alexandru
   Popa, Mircea Ioan
TI Two year experience with the GeneXpert NAAT system in the romanian M.
   tuberculosis NRC in Bucharest
SO EUROPEAN RESPIRATORY JOURNAL
LA English
DT Meeting Abstract
C1 [Adriana, Moisoiu] Marius Nasta Natl Inst Pneumophtysiol, Bucharest, Romania.
   [Muntean, Andrei-Alexandru; Popa, Mircea Ioan] Carol Davila Univ Med & Pharm, Bucharest, Romania.
   [Muntean, Andrei-Alexandru; Popa, Mircea Ioan] Cantacuzino Natl Medicomil Inst Res & Dev, Bucharest, Romania.
EM amoisoiu55@gmail.com
RI Popa, Mircea I/A-4830-2011; Muntean, Andrei-Alexandru/AAL-8965-2021
OI Muntean, Andrei-Alexandru/0000-0002-4124-2909
NR 0
TC 0
Z9 0
U1 0
U2 0
PU EUROPEAN RESPIRATORY SOC JOURNALS LTD
PI SHEFFIELD
PA 442 GLOSSOP RD, SHEFFIELD S10 2PX, ENGLAND
SN 0903-1936
EI 1399-3003
J9 EUR RESPIR J
JI Eur. Resp. J.
PD SEP 7
PY 2020
VL 56
SU 64
MA 475
DI 10.1183/13993003.congress-2020.475
PG 2
WC Respiratory System
WE Science Citation Index Expanded (SCI-EXPANDED)
SC Respiratory System
GA PQ4FO
UT WOS:000606501400411
DA 2022-08-20
ER

PT J
AU Chaisson, LH
   Davis, JL
AF Chaisson, Lelia H.
   Davis, J. Lucian
TI Additional Benefits of GeneXpert MTB/RIF Assay for the Evaluation of
   Pulmonary Tuberculosis Among Inpatients Reply
SO CLINICAL INFECTIOUS DISEASES
LA English
DT Letter
ID IMPACT
C1 [Chaisson, Lelia H.; Davis, J. Lucian] Univ California, San Francisco Gen Hosp, Div Pulm & Crit Care Med, San Francisco, CA USA.
   [Davis, J. Lucian] Univ California, San Francisco Gen Hosp, Curry Int TB Ctr, San Francisco, CA USA.
   [Chaisson, Lelia H.; Davis, J. Lucian] Univ California, San Francisco Gen Hosp, Dept Med, San Francisco, CA USA.
RP Davis, JL (通讯作者)，San Francisco Gen Hosp, Room 5K1,1001 Potrero Ave, San Francisco, CA 94110 USA.
EM lucian.davis@ucsf.edu
RI Davis, J. Lucian/AAC-8376-2019
OI Davis, J. Lucian/0000-0002-8629-9992
CR Baker BJ, 2015, CLIN INFECT DIS, V60, P1287, DOI 10.1093/cid/civ006
   Chaisson LH, 2014, CLIN INFECT DIS, V59, P1353, DOI 10.1093/cid/ciu620
   Lippincott CK, 2014, CLIN INFECT DIS, V59, DOI 10.1093/cid/ciu212
   Millman AJ, 2013, PLOS ONE, V8, DOI 10.1371/journal.pone.0079669
   Mulherin SA, 2002, ANN INTERN MED, V137, P598, DOI 10.7326/0003-4819-137-7-200210010-00011
   Sohn H, 2014, CLIN INFECT DIS, V58, P970, DOI 10.1093/cid/ciu022
   Steingart KR, 2014, COCHRANE DB SYST REV, DOI [10.1002/14651858.CD009593.pub3, 10.1002/14651858.CD009593.pub2]
NR 7
TC 0
Z9 0
U1 0
U2 0
PU OXFORD UNIV PRESS INC
PI CARY
PA JOURNALS DEPT, 2001 EVANS RD, CARY, NC 27513 USA
SN 1058-4838
EI 1537-6591
J9 CLIN INFECT DIS
JI Clin. Infect. Dis.
PD APR 15
PY 2015
VL 60
IS 8
BP 1288
EP U213
DI 10.1093/cid/civ008
PG 2
WC Immunology; Infectious Diseases; Microbiology
WE Science Citation Index Expanded (SCI-EXPANDED)
SC Immunology; Infectious Diseases; Microbiology
GA CH0MX
UT WOS:000353715600030
PM 25586685
OA Bronze
DA 2022-08-20
ER

PT J
AU Ullah, I
   Irfan, M
   Aziz, K
AF Ullah, I.
   Irfan, M.
   Aziz, K.
TI DIAGNOSTIC ACCURACY OF GENEXPERT (XPERT (R) MTB/ RIF) IN BRONCHOALVEOLAR
   LAVAGE FOR DIAGNOSIS OF PULMONARY TUBERCULOSIS
SO RESPIROLOGY
LA English
DT Meeting Abstract
C1 [Ullah, I.; Irfan, M.] Aga Khan Univ & Hosp, Pulm Med, Karachi, Pakistan.
   [Aziz, K.] Aga Khan Univ & Hosp, Internal Med, Karachi, Pakistan.
NR 0
TC 0
Z9 0
U1 0
U2 0
PU WILEY-BLACKWELL
PI HOBOKEN
PA 111 RIVER ST, HOBOKEN 07030-5774, NJ USA
SN 1323-7799
EI 1440-1843
J9 RESPIROLOGY
JI Respirology
PD NOV
PY 2016
VL 21
SU 3
SI SI
MA APSR6-0087
BP 93
EP 93
PG 1
WC Respiratory System
WE Science Citation Index Expanded (SCI-EXPANDED)
SC Respiratory System
GA EC0NJ
UT WOS:000387797600275
DA 2022-08-20
ER

PT J
AU Alame-Emane, AK
   Pierre-Audigier, C
   Aboumegone-Biyogo, OC
   Nzoghe-Mveang, A
   Cadet-Daniel, V
   Sola, C
   Djoba-Siawaya, JF
   Gicquel, B
   Takiff, HE
AF Alame-Emane, Amel Kevin
   Pierre-Audigier, Catherine
   Aboumegone-Biyogo, Oriane Cordelia
   Nzoghe-Mveang, Amandine
   Cadet-Daniel, Veronique
   Sola, Christophe
   Djoba-Siawaya, Joel Fleury
   Gicquel, Brigitte
   Takiff, Howard E.
TI Use of GeneXpert Remnants for Drug Resistance Profiling and Molecular
   Epidemiology of Tuberculosis in Libreville, Gabon
SO JOURNAL OF CLINICAL MICROBIOLOGY
LA English
DT Article
DE Mycobacterium tuberculosis; Libreville; Gabon; MDR-TB; molecular
   epidemiology; GeneXpert; sequencing; Beijing family; drug resistance;
   drug sensitivity testing; multidrug resistance
ID SINGLE NUCLEOTIDE POLYMORPHISM; MYCOBACTERIUM-TUBERCULOSIS; RIFAMPIN
   RESISTANCE; PYRAZINAMIDE RESISTANCE; MDR-TB; MUTATIONS; ASSAY;
   POPULATION; DIAGNOSIS; GENOTYPE
AB Multidrug-resistant (MDR) and extensively drug resistant (XDR) strains of Mycobacterium tuberculosis pose major problems for global health. The GeneXpert MTB/RIF (Xpert) assay rapidly detects resistance to rifampin (RIFr), but for detection of the additional resistance that defines MDR-TB (MDR tuberculosis) and XDR-TB, and for molecular epidemiology, specimen cultures and a biosafe infrastructure are generally required. We sought to determine whether the remnants of sputa prepared for the Xpert assay could be used directly to find mutations associated with drug resistance and to study molecular epidemiology, thus providing precise characterization of MDR-TB cases in countries lacking biosafety level 3 (BSL3) facilities for M. tuberculosis cultures. After sputa were processed and run on the Xpert instrument, the leftovers of the samples prepared for the Xpert assay were used for PCR amplification and sequencing or for a line probe assay to detect mutations associated with resistance to additional drugs, as well as for molecular epidemiology with spoligotyping and selective mycobacterial interspersed repetitive-unit-variable-number tandem-repeat (MIRU-VNTR) typing. Of 130 sputum samples from Gabon tested with the Xpert assay, 124 yielded interpretable results; 21 (17%) of these were determined to be RIFr. Amplification and sequencing or a line probe assay of the Xpert remnants confirmed 18/21 samples as MDR, corresponding to 12/116 (9.5%) new and 6/8 (75%) previously treated TB patients. Spoligotyping and MIRU typing with hypervariable loci identified an MDR Beijing strain present in five samples. We conclude that the remnants of samples processed for the Xpert assay can be used in PCRs to find mutations associated with the resistance to the additional drugs that defines MDR and XDR-TB and to study molecular epidemiology without the need for culturing or a biosafe infrastructure.
C1 [Alame-Emane, Amel Kevin; Pierre-Audigier, Catherine; Cadet-Daniel, Veronique; Gicquel, Brigitte; Takiff, Howard E.] Inst Pasteur, Unite Genet Mycobacterienne, Paris, France.
   [Alame-Emane, Amel Kevin; Aboumegone-Biyogo, Oriane Cordelia; Nzoghe-Mveang, Amandine; Djoba-Siawaya, Joel Fleury] Lab Natl Sante Publ, Unite Rech & Diagnost Specialises, Libreville, Gabon.
   [Sola, Christophe] Univ Paris Saclay, Univ Paris Sud, CNRS, CEA,I2BC, Gif Sur Yvette, France.
   [Gicquel, Brigitte] Chinese Acad Sci, Inst Pasteur Shanghai, Emerging Bacterial Pathogens Lab, CAS Key Lab Mol Virol & Immunol, Shanghai, Peoples R China.
   [Takiff, Howard E.] Inst Venezolano Invest Cient, Caracas, Venezuela.
RP Gicquel, B (通讯作者)，Inst Pasteur, Unite Genet Mycobacterienne, Paris, France.; Djoba-Siawaya, JF (通讯作者)，Lab Natl Sante Publ, Unite Rech & Diagnost Specialises, Libreville, Gabon.; Gicquel, B (通讯作者)，Chinese Acad Sci, Inst Pasteur Shanghai, Emerging Bacterial Pathogens Lab, CAS Key Lab Mol Virol & Immunol, Shanghai, Peoples R China.
EM joel.djoba@gmail.com; brigitte.gicquel@pasteur.fr
RI Sola, Christophe/A-7992-2016; Siawaya, Joel Fleury Djoba/N-3156-2019
OI Sola, Christophe/0000-0003-4672-2140; Siawaya, Joel Fleury
   Djoba/0000-0002-0369-0153
FU European Union [604237]; Gabonese Republic; Chinese Academy of Sciences,
   Beijing, China; Institut Pasteur of Shanghai, Shanghai, China; Institut
   Pasteur of Paris, Paris, France; Instituto Venezolano de Investigaciones
   Cientificas (IVIC), Caracas, Venezuela
FX This work is part of the NAREB (Nanotheraputics for Antibiotic Resistant
   Emerging Bacterial Pathogens) European Research Network (Collaborative
   Project), supported by the European Union's Seventh Framework Program
   for research, technological development, and demonstration under grant
   agreement 604237. This work is also part of the "Programme de recherche
   sur les nouvelles molecules intervenant dans la lutte contre la
   tuberculose," supported by the Gabonese Republic. This study was also
   supported by the Chinese Academy of Sciences, Beijing, China; the
   Institut Pasteur of Shanghai, Shanghai, China; the Institut Pasteur of
   Paris, Paris, France; and the Instituto Venezolano de Investigaciones
   Cientificas (IVIC), Caracas, Venezuela.
CR Alame-Emane AK, 2015, INT J TUBERC LUNG D, V19, P679, DOI 10.5588/ijtld.14.0768
   Allix-Beguec C, 2014, J CLIN MICROBIOL, V52, P164, DOI 10.1128/JCM.02519-13
   Aung KJM, 2014, INT J TUBERC LUNG D, V18, P1180, DOI 10.5588/ijtld.14.0100
   Belard S, 2016, AM J TROP MED HYG
   Boehme CC, 2010, NEW ENGL J MED, V363, P1005, DOI 10.1056/NEJMoa0907847
   Bonilla Cesar A, 2008, PLoS One, V3, pe2957, DOI 10.1371/journal.pone.0002957
   Bradley P, 2015, NAT COMMUN, V6, DOI 10.1038/ncomms10063
   Brown AC, 2015, J CLIN MICROBIOL, V53, P2230, DOI 10.1128/JCM.00486-15
   Chakravorty S, 2008, J CLIN MICROBIOL, V46, P2555, DOI 10.1128/JCM.00666-08
   Coll F, 2015, GENOME MED, V7, DOI 10.1186/s13073-015-0164-0
   Couvin D, 2015, TUBERCULOSIS, V95, pS177, DOI 10.1016/j.tube.2015.02.023
   Cremers AL, 2013, PUBLIC HEALTH ACTION, V3, P328, DOI 10.5588/pha.13.0038
   Crudu V, 2012, J CLIN MICROBIOL, V50, P1264, DOI 10.1128/JCM.05903-11
   Dye C, 2000, P NATL ACAD SCI USA, V97, P8180, DOI 10.1073/pnas.140102797
   Gomgnimbou MK, 2013, J CLIN MICROBIOL, V51, P3527, DOI 10.1128/JCM.01523-13
   Hanekom M, 2011, TUBERCULOSIS, V91, P510, DOI 10.1016/j.tube.2011.07.005
   Hazbon MH, 2006, ANTIMICROB AGENTS CH, V50, P2640, DOI 10.1128/AAC.00112-06
   Helb D, 2010, J CLIN MICROBIOL, V48, P229, DOI 10.1128/JCM.01463-09
   International Union Against Tuberculosis and Lung Disease, 2000, TECHN GUID SPUT EX T, P14
   Johnson R, 2006, INT J TUBERC LUNG D, V10, P1412
   Kamerbeek J, 1997, J CLIN MICROBIOL, V35, P907, DOI 10.1128/JCM.35.4.907-914.1997
   Karlsson E, 2015, SCI REP-UK, V5, DOI 10.1038/srep11996
   Kuaban C, 2015, INT J TUBERC LUNG D, V19, P517, DOI 10.5588/ijtld.14.0535
   Luo T, 2012, J CLIN MICROBIOL, V50, P633, DOI 10.1128/JCM.05539-11
   Martin L, 2014, PLOS ONE, V9, DOI 10.1371/journal.pone.0107258
   Mounguengui D, 2012, Bull Soc Pathol Exot, V105, P1, DOI 10.1007/s13149-011-0195-8
   Nkoghe D, 2005, Bull Soc Pathol Exot, V98, P121
   Ouassa T, 2012, PLOS ONE, V7, DOI 10.1371/journal.pone.0045363
   Pym AS, 2002, INFECT IMMUN, V70, P4955, DOI 10.1128/IAI.70.9.4955-4960.2002
   Ramirez-Busby SM, 2015, ANTIMICROB AGENTS CH, V59, P5267, DOI 10.1128/AAC.00204-15
   Rigouts L, 2016, J ANTIMICROB CHEMOTH, V71, P314, DOI 10.1093/jac/dkv360
   Sandgren A, 2009, PLOS MED, V6, P132, DOI 10.1371/journal.pmed.1000002
   Sola Christophe, 2015, Methods Mol Biol, V1311, P91, DOI 10.1007/978-1-4939-2687-9_6
   Stolp SM, 2013, CLIN MICROBIOL INFEC, V19, pE499, DOI 10.1111/1469-0691.12278
   Tagliani E, 2015, J CLIN MICROBIOL, V53, P2961, DOI 10.1128/JCM.01257-15
   Van Deun A, 2010, AM J RESP CRIT CARE, V182, P684, DOI 10.1164/rccm.201001-0077OC
   Walusimbi S, 2013, BMC INFECT DIS, V13, DOI 10.1186/1471-2334-13-507
   World Health Organization, 2016, TUB DIAGN XPERT MTB
   World Health Organization, 2015, GLOB TUB REP 2015
   World Health Organization, 2016, GLOBT UB REP 2016
   Yeboah-Manu D, 2011, PLOS ONE, V6, DOI 10.1371/journal.pone.0021906
NR 41
TC 12
Z9 12
U1 0
U2 1
PU AMER SOC MICROBIOLOGY
PI WASHINGTON
PA 1752 N ST NW, WASHINGTON, DC 20036-2904 USA
SN 0095-1137
EI 1098-660X
J9 J CLIN MICROBIOL
JI J. Clin. Microbiol.
PD JUL
PY 2017
VL 55
IS 7
BP 2105
EP 2115
DI 10.1128/JCM.02257-16
PG 11
WC Microbiology
WE Science Citation Index Expanded (SCI-EXPANDED)
SC Microbiology
GA FA3IX
UT WOS:000405338100017
PM 28446574
OA Green Published, hybrid
DA 2022-08-20
ER

PT J
AU Marouane, C
   Smaoui, S
   Kammoun, S
   Slim, L
   Messadi-Akrout, F
AF Marouane, C.
   Smaoui, S.
   Kammoun, S.
   Slim, L.
   Messadi-Akrout, F.
TI Evaluation of molecular detection of extrapulmonary tuberculosis and
   resistance to rifampicin with GeneXpert (R) MTB/RIF
SO MEDECINE ET MALADIES INFECTIEUSES
LA English
DT Article
DE Mycobacterium tuberculosis complex; GeneXpert (R) MTB/RIF; Resistance to
   rifampicin; Extrapulmonary tuberculosis
ID XPERT MTB/RIF; RAPID DIAGNOSIS; MYCOBACTERIUM-TUBERCULOSIS; ASSAY;
   SAMPLES; SPECIMENS; PULMONARY
AB Objective. - We aimed to evaluate the GeneXpert (R) MTB/RIF test for the diagnosis of extrapulmonary tuberculosis. The test simultaneously detects Mycobacterium tuberculosis complex and resistance to rifampicin.
   Methods. - We analyzed 153 clinical samples collected in a tertiary hospital in Sfax, Tunisia, between 2013 and 2014. We performed the GeneXpert (R) test, a Ziehl-Neelsen and auramine-rhodamine staining, conventional culture on MGIT 960 and LJ media, and we tested the resistance to anti-tuberculosis drugs on MGIT 960 and LJ media for each sample. Diagnosis was based on clinical, radiological, microbiological, pathological, and therapeutic data.
   Results. - We considered that 59 patients out of 153 presented with tuberculosis. PCR was positive in 50 samples and all of these samples were susceptible to rifampicin. Sensitivity, specificity, positive predictive value, and negative predictive value of the GeneXpert (R) test were 84.7%, 96.8%, 94.3%, and 91%, respectively, compared with diagnosis. We observed a statistically significant difference between the direct test and the GeneXpert (R) test, and between culture and the GeneXpert (R) test. No statistically significant difference was observed between pathological results and the GeneXpert (R) test. Sensitivity of the GeneXpert (R) test was 87.5% in biopsies, 80% in pus and abscesses, and 66.7% in biological fluids. All strains were susceptible to rifampicin with culture and GeneXpert test.
   Conclusion. - The GeneXpert (R) test helped detect a higher proportion of M. tuberculosis complex. It does not replace conventional diagnostic methods but it is a useful addition to achieve better sensitivity and obtain rapid results. (C) 2015 Elsevier Masson SAS. All rights reserved.
C1 [Marouane, C.; Smaoui, S.; Kammoun, S.; Messadi-Akrout, F.] Hedi Chaker Univ Hosp, Reg Lab Hyg, Sfax, Tunisia.
   [Slim, L.] Pulmonol Hosp, Microbiol Lab, Ariana, Tunisia.
RP Marouane, C (通讯作者)，Hedi Chaker Univ Hosp, Reg Lab Hyg, Sfax, Tunisia.
EM Marouane.chema@gmail.com
CR Ben Kheder A, 2014, GUIDE PRISE CHARGE T
   Causse M, 2011, J CLIN MICROBIOL, V49, P3065, DOI 10.1128/JCM.00491-11
   Friedrich SO, 2011, J CLIN MICROBIOL, V49, P4341, DOI 10.1128/JCM.05454-11
   Hillemann D, 2011, J CLIN MICROBIOL, V49, P1202, DOI 10.1128/JCM.02268-10
   Lawn SD, 2013, LANCET INFECT DIS, V13, P349, DOI 10.1016/S1473-3099(13)70008-2
   Ligthelm LJ, 2011, J CLIN MICROBIOL, V49, P3967, DOI 10.1128/JCM.01310-11
   LoBue PA, 2010, INT J TUBERC LUNG D, V14, P1075
   Maynard-Smith L, 2014, BMC INFECT DIS, V14, DOI 10.1186/s12879-014-0709-7
   Moure R, 2012, J CLIN MICROBIOL, V50, P513, DOI 10.1128/JCM.06467-11
   Noordhoek GT, 2004, CLIN MICROBIOL INFEC, V10, P295, DOI 10.1111/j.1198-743X.2004.00825.x
   Peter JG, 2012, PLOS ONE, V7, DOI 10.1371/journal.pone.0039966
   Rochat F, 2014, REV MED SUISSE, V10, P123
   Theron G, 2014, LANCET INFECT, V13, P1
   Tortoli E, 2012, EUR RESPIR J, V40, P442, DOI 10.1183/09031936.00176311
   Vadwai V, 2011, J CLIN MICROBIOL, V49, P2540, DOI 10.1128/JCM.02319-10
   World Health Organisation, 2011, RAP IMPL XPERT MTB R
   World Health Organization, 2010, TUB DIAGN AUT DNA TE
   Zeka AN, 2011, J CLIN MICROBIOL, V49, P4138, DOI 10.1128/JCM.05434-11
NR 18
TC 12
Z9 15
U1 1
U2 8
PU ELSEVIER FRANCE-EDITIONS SCIENTIFIQUES MEDICALES ELSEVIER
PI PARIS
PA 23 RUE LINOIS, 75724 PARIS, FRANCE
SN 0399-077X
J9 MED MALADIES INFECT
JI Med. Mal. Infect.
PD FEB
PY 2016
VL 46
IS 1
BP 20
EP 24
DI 10.1016/j.medmal.2015.10.012
PG 5
WC Infectious Diseases
WE Science Citation Index Expanded (SCI-EXPANDED)
SC Infectious Diseases
GA DG1SH
UT WOS:000371847300005
PM 26654321
DA 2022-08-20
ER

PT J
AU Laushkina, Z
   Cherednichenko, A
AF Laushkina, Zhanna
   Cherednichenko, Andrey
TI Estimation of the role of the test GeneXpert MTB-RIF in the diagnosis of
   pulmonary tuberculosis
SO EUROPEAN RESPIRATORY JOURNAL
LA English
DT Meeting Abstract
DE Tuberculosis - diagnosis; MDR-TB
RI Cherednichenko, Andrey/I-3696-2018; Laushkina, Zhanna/S-1645-2017
OI Cherednichenko, Andrey/0000-0002-1535-3904; Laushkina,
   Zhanna/0000-0002-2266-6132
NR 0
TC 2
Z9 2
U1 0
U2 0
PU EUROPEAN RESPIRATORY SOC JOURNALS LTD
PI SHEFFIELD
PA 442 GLOSSOP RD, SHEFFIELD S10 2PX, ENGLAND
SN 0903-1936
EI 1399-3003
J9 EUR RESPIR J
JI Eur. Resp. J.
PD SEP
PY 2014
VL 44
SU 58
MA P2677
PG 4
WC Respiratory System
WE Science Citation Index Expanded (SCI-EXPANDED)
SC Respiratory System
GA V45SS
UT WOS:000209836905270
DA 2022-08-20
ER

PT J
AU Munoz, L
   Moure, R
   Porta, N
   Gonzalez, L
   Guerra, R
   Alcaide, F
   Santin, M
AF Munoz, Laura
   Moure, Raquel
   Porta, Nuria
   Gonzalez, Lucia
   Guerra, Rosario
   Alcaide, Fernando
   Santin, Miguel
TI GeneXpert (R) for smear-negative pulmonary tuberculosis: does it play a
   role in low-burden countries?
SO DIAGNOSTIC MICROBIOLOGY AND INFECTIOUS DISEASE
LA English
DT Article
DE Early diagnosis; Mycobacterium tuberculosis; Nucleic acid amplification;
   Xpert MTB/RIF assay
ID XPERT MTB/RIF; RESISTANCE; DIAGNOSIS; ACCURACY
AB We performed a retrospective analysis of costs and time to treatment (TT) of 150 culture-confirmed TB cases: 100 sputum smear (SS) (+) and 50 SS(). This group underwent GeneXpert (R) (GX) assay. Expenditures and IT of SS(-)/GX(+) cases were inferred from the SS(+) group. GX detected 68% of SS(-) cases. (C) 2013 Elsevier Inc. All rights reserved.
C1 [Munoz, Laura; Gonzalez, Lucia; Guerra, Rosario; Santin, Miguel] Bellvitge Univ Hosp IDIBELL, Dept Infect Dis, Barcelona, Spain.
   [Moure, Raquel; Alcaide, Fernando] Bellvitge Univ Hosp IDIBELL, Dept Microbiol, Barcelona, Spain.
   [Porta, Nuria] Bellvitge Univ Hosp IDIBELL, Cent Unit Clin Res & Clin Trials UCICEC, Barcelona, Spain.
   [Alcaide, Fernando] Univ Barcelona, Dept Pathol & Expt Therapeut, E-08007 Barcelona, Spain.
   [Santin, Miguel] Univ Barcelona, Dept Clin Sci, E-08007 Barcelona, Spain.
RP Munoz, L (通讯作者)，Bellvitge Univ Hosp IDIBELL, Dept Infect Dis, Barcelona, Spain.
EM laura.lopez@bellvitgehospital.cat
RI Porta, Nuria/H-4441-2015; Alcaide, Fernando/B-4124-2015
OI Porta, Nuria/0000-0003-2458-2167; Alcaide, Fernando/0000-0002-4097-1499
CR Boehme CC, 2011, LANCET, V377, P1495, DOI 10.1016/S0140-6736(11)60438-8
   Boehme CC, 2010, NEW ENGL J MED, V363, P1005, DOI 10.1056/NEJMoa0907847
   Catanzaro A, 2000, JAMA-J AM MED ASSOC, V283, P639, DOI 10.1001/jama.283.5.639
   [Generalitat de Catalunya Departament de Salut], INF AN 2010 SIT EP T
   Marlowe EM, 2011, J CLIN MICROBIOL, V49, P1621, DOI 10.1128/JCM.02214-10
   Moure R, 2011, J CLIN MICROBIOL, V49, P1137, DOI 10.1128/JCM.01831-10
   Taylor Z, 2000, INT J TUBERC LUNG D, V4, P931
   Theron G, 2012, EUR RESPIR J, V40, P161, DOI 10.1183/09031936.00145511
   Vassall A, 2011, PLOS MED, V8, DOI 10.1371/journal.pmed.1001120
   World Health Organization, 2010, ROADM ROLL XPERT MTB
NR 10
TC 11
Z9 11
U1 0
U2 15
PU ELSEVIER SCIENCE INC
PI NEW YORK
PA 360 PARK AVE SOUTH, NEW YORK, NY 10010-1710 USA
SN 0732-8893
J9 DIAGN MICR INFEC DIS
JI Diagn. Microbiol. Infect. Dis.
PD MAR
PY 2013
VL 75
IS 3
BP 325
EP 326
DI 10.1016/j.diagmicrobio.2012.11.011
PG 2
WC Infectious Diseases; Microbiology
WE Science Citation Index Expanded (SCI-EXPANDED)
SC Infectious Diseases; Microbiology
GA 095FC
UT WOS:000315319100019
PM 23276773
DA 2022-08-20
ER

PT J
AU Motse, FDK
   Nsagha, DS
   Teyim, PM
   Adiogo, D
   Foko, LPK
   Koum, DCK
   Ngaba, GP
   Nguedia, JCA
AF Kouemo Motse, Francine D.
   Nsagha, Dickson Shey
   Teyim, Pride M.
   Adiogo, Dieudonne
   Kojom Foko, Loick P.
   Kedy Koum, Danielle C.
   Ngaba, Guy P.
   Assob Nguedia, Jules C.
TI Rifampicin resistance among Mycobacterium tuberculosis-infected
   individuals using GeneXpert MTB/RIF ultra: a hospital-based study
SO TROPICAL MEDICINE & INTERNATIONAL HEALTH
LA English
DT Article
DE Tuberculosis; rifampicin resistance; prevalence; associated factors;
   Cameroon
ID ANTITUBERCULOSIS DRUG-RESISTANCE; XPERT MTB/RIF; PULMONARY TUBERCULOSIS;
   PREVALENCE; DIAGNOSIS; CAMEROON; YAOUNDE
AB Objectives To determine the prevalence and risk factors associated with rifampicin (RIF)-resistant tuberculosis using GeneXpert technology.
   Methods A cross-sectional study was conducted from April 2018 to November 2019 among tuberculosis (TB)-infected Cameroonian patients in the Littoral Region using records from patients presenting with clinically suspected or documented TB. The patients were screened for TB using GeneXpert MDR/RIF ultra. Data were documented with an ad hoc survey form and analysed with SPSS version 22.
   Results 153 patients were included in the study. 64.1% were males; mean age was 37.9 +/- 14.7 years and median age 37 years (range: 2-82). Most patients were new cases (76.4%). Relapses accounted for 8.5% and recurrences for 2.6%. Pulmonary TB was diagnosed among 98.7% patients using mostly sputum samples (85%). The prevalence of RIF resistance was 6.7% (95% CI: 3.4%-12.7%). This prevalence was significantly higher in samples of mucus and mucopurulent aspect (P-value = 0.04). RIF-resistant M. tuberculosis strains were significantly more frequent among relapses than new cases (23.1% vs. 2.3% P-value < 0.0001). A statistically significant association was found between GeneXpert-based quantification results and type and aspect of samples.
   Conclusion This study confirms the circulation of RIF-resistant M. tuberculosis strains in the Littoral region. There is a need for extensive studies in other parts of the country.
C1 [Kouemo Motse, Francine D.; Assob Nguedia, Jules C.] Univ Buea, Fac Hlth Sci, Dept Med Lab Sci, Buea, SW Region, Cameroon.
   [Nsagha, Dickson Shey] Univ Buea, Fac Hlth Sci, Dept Publ Hlth & Hyg, Buea, SW Region, Cameroon.
   [Teyim, Pride M.] Littoral Reg Delegat Publ Hlth, TB Reference Lab, Douala, Littoral Region, Cameroon.
   [Adiogo, Dieudonne; Kedy Koum, Danielle C.; Ngaba, Guy P.] Univ Douala, Fac Med & Pharmaceut Sci, Dept Biol Sci, Douala, Littoral Region, Cameroon.
   [Kojom Foko, Loick P.] Univ Douala, Dept Anim Organisms, Douala, Cameroon.
RP Nguedia, JCA (通讯作者)，Univ Buea, Fac Hlth Sci, Dept Med Lab Sci, Buea, SW Region, Cameroon.
EM Juleclement@yahoo.fr
RI Pradel, KOJOM FOKO Loick/AAI-6364-2020
OI Pradel, KOJOM FOKO Loick/0000-0002-4286-147X
CR Da Silva PEA, 2011, J ANTIMICROB CHEMOTH, V66, P1417, DOI 10.1093/jac/dkr173
   [Anonymous], 2017, ANN RES HOSP
   [Anonymous], 2015, BMJ, V350, ph1033
   Assam-Assam JP, 2011, BMC INFECT DIS, V11, DOI 10.1186/1471-2334-11-94
   Bansal R, 2018, MINI-REV MED CHEM, V18, P58, DOI 10.2174/1389557516666160823160010
   Bercion R, 1997, INT J TUBERC LUNG D, V1, P110
   Boakye-Appiah JK, 2016, INT J MYCOBACT, V5, P226, DOI 10.1016/j.ijmyco.2016.02.004
   Boehme CC, 2011, LANCET, V377, P1495, DOI 10.1016/S0140-6736(11)60438-8
   Boehme CC, 2010, NEW ENGL J MED, V363, P1005, DOI 10.1056/NEJMoa0907847
   Dagnra A. Y., 2015, New Microbes and New Infections, V8, P24, DOI 10.1016/j.nmni.2015.09.001
   Dorman SE, 2018, LANCET INFECT DIS, V18, P76, DOI [10.1016/S1473-3099(17)30691-6, 10.1016/s1473-3099(17)30691-6]
   Githui W., 2014, AFRICAN J HLTH SCI, V27, P446
   Golden MP, 2005, AM FAM PHYSICIAN, V72, P1761
   Helb D, 2010, J CLIN MICROBIOL, V48, P229, DOI 10.1128/JCM.01463-09
   Hendy RM, 2019, EGYPT J CHEST DIS TU, V68, P74, DOI 10.4103/ejcdt.ejcdt_112_18
   Holmberg PJ, 2019, PEDIATR REV, V40, P168, DOI 10.1542/pir.2018-0093
   Ioannidis P, 2011, J CLIN MICROBIOL, V49, P3068, DOI 10.1128/JCM.00718-11
   Kuaban C, 2000, INT J TUBERC LUNG D, V4, P356
   Kuaban C, 2000, INT J TUBERC LUNG D, V4, P427
   Lebina L, 2015, TUBERCULOSIS, V95, P625, DOI 10.1016/j.tube.2015.05.006
   LeFonds mondial, 2017, NOT INF TECHN TUB GE
   Marlowe EM, 2011, J CLIN MICROBIOL, V49, P1621, DOI 10.1128/JCM.02214-10
   Masenga SK, 2017, BMC INFECT DIS, V17, DOI 10.1186/s12879-017-2750-9
   Mbuh TP, 2019, BMC PULM MED, V19, DOI 10.1186/s12890-018-0770-x
   Meriki HD, 2013, PLOS ONE, V8, DOI 10.1371/journal.pone.0077410
   Meyer AJ, 2017, PLOS ONE, V12, DOI 10.1371/journal.pone.0180572
   Noeske J, 2018, BMC Res Notes, V11, P580, DOI 10.1186/s13104-018-3675-0
   Pantoja A, 2013, EUR RESPIR J, V42, P708, DOI 10.1183/09031936.00147912
   Reechaipichitkul W, 2016, SE ASIAN J TROP MED, V47, P457
   Sanders M, 2006, INT J TUBERC LUNG D, V10, P178
   Walbang Ossoga G, 2014, REV CAMES SANTE, V2, P18
   WHO, 2011, XPERT MTB RIF ASS DI
   WHO, 2008, WORLD HLTH STAT 2008
   World Health Organization, 2018, GLOB TUB REP 2018
NR 34
TC 0
Z9 0
U1 0
U2 0
PU WILEY
PI HOBOKEN
PA 111 RIVER ST, HOBOKEN 07030-5774, NJ USA
SN 1360-2276
EI 1365-3156
J9 TROP MED INT HEALTH
JI Trop. Med. Int. Health
PD FEB
PY 2021
VL 26
IS 2
BP 159
EP 165
DI 10.1111/tmi.13489
EA NOV 2020
PG 7
WC Public, Environmental & Occupational Health; Tropical Medicine
WE Science Citation Index Expanded (SCI-EXPANDED)
SC Public, Environmental & Occupational Health; Tropical Medicine
GA QA5YU
UT WOS:000592630900001
PM 32946180
DA 2022-08-20
ER

PT J
AU Hanif, SNM
   Eldeen, HS
   Ahmad, S
   Mokaddas, E
AF Hanif, Shumaila N. M.
   Eldeen, Hana S.
   Ahmad, Suhail
   Mokaddas, Eiman
TI GeneXpert (R) MTB/RIF for rapid detection of Mycobacterium tuberculosis
   in pulmonary and extra-pulmonary samples
SO INTERNATIONAL JOURNAL OF TUBERCULOSIS AND LUNG DISEASE
LA English
DT Letter
ID RIFAMPIN RESISTANCE
C1 [Ahmad, Suhail; Mokaddas, Eiman] Kuwait Univ, Dept Microbiol, Fac Med, Safat, Kuwait.
EM suhail_ah@hsc.edu.kw
RI Ahmad, Suhail/AAJ-5456-2021
CR Ahmad S, 2009, RESP MED, V103, P1777, DOI 10.1016/j.rmed.2009.07.010
   Behr MA, 1999, LANCET, V353, P444, DOI 10.1016/S0140-6736(98)03406-0
   Boehme CC, 2010, NEW ENGL J MED, V363, P1005, DOI 10.1056/NEJMoa0907847
   Helb D, 2010, J CLIN MICROBIOL, V48, P229, DOI 10.1128/JCM.01463-09
   Hillemann D, 2011, J CLIN MICROBIOL, V49, P1202, DOI 10.1128/JCM.02268-10
   Mokaddas E, 2008, INT J TUBERC LUNG D, V12, P319
NR 6
TC 23
Z9 25
U1 0
U2 4
PU INT UNION AGAINST TUBERCULOSIS LUNG DISEASE (I U A T L D)
PI PARIS
PA 68 BOULEVARD SAINT-MICHEL,, 75006 PARIS, FRANCE
SN 1027-3719
J9 INT J TUBERC LUNG D
JI Int. J. Tuberc. Lung Dis.
PD SEP
PY 2011
VL 15
IS 9
BP 1274
EP 1275
DI 10.5588/ijtld.11.0394
PG 2
WC Infectious Diseases; Respiratory System
WE Science Citation Index Expanded (SCI-EXPANDED)
SC Infectious Diseases; Respiratory System
GA 815JC
UT WOS:000294520900029
PM 21943862
DA 2022-08-20
ER

PT J
AU Sah, AK
   Joshi, B
   Khadka, DK
   Gupta, BP
   Adhikari, A
   Singh, SK
   Rai, G
   Vaidya, GS
   Rajbhandari, R
   Pant, B
   Rai, SK
AF Sah, Anil Kumar
   Joshi, Bishnu
   Khadka, Dhruba Kumar
   Gupta, Birendra Prasad
   Adhikari, Anurag
   Singh, Subodh Kant
   Rai, Ganesh
   Vaidya, Geeta Shrestha
   Rajbhandari, Reema
   Pant, Basant
   Rai, Shiba Kumar
TI Comparative Study of GeneXpert MTB/RIF Assay and Multiplex PCR Assay for
   Direct Detection of Mycobacterium tuberculosis in Suspected Pulmonary
   Tuberculosis Patients
SO CURRENT MICROBIOLOGY
LA English
DT Article
ID POLYMERASE-CHAIN-REACTION; RAPID DIAGNOSIS; INSERTION-SEQUENCE; RIFAMPIN
   RESISTANCE; IS6110; IDENTIFICATION; CULTURE; DNA; PURIFICATION;
   MICROSCOPY
AB Pulmonary tuberculosis (PTB) is one of the major infectious diseases in developing countries. The objective of this study was to compare rapid diagnostics technique, GeneXpert MTB/RIF (GeneXpert) and Multiplex PCR assay (MPCR) targeting IS6110 segment and mpb64 gene for direct detection of Mycobacterium tuberculosis (MTB) in suspected PTB patients. A cross sectional study was carried among 105 sputum samples from suspected PTB patients to evaluate GeneXpert and Multiplex PCR who visited National Tuberculosis Center, Nepal. The patient's sputum samples were used directly for the GeneXpert whereas DNA extraction by CTAB method was followed to process the sample for MPCR. The sensitivity and specificity of GeneXpert and MPCR in smear positive cases was 78.6, 33.3, and 100.0%, 66.7%, respectively (P = 0.125). However, in smear negative cases sensitivity and specificity of both methods exhibited 90.9, 95.2, and 100.0%, 100.0% respectively (P = 0.625). Finally, the sensitivity and specificity of GeneXpert and MPCR were 82.9, 95.3 and 100.0%, 98.5% respectively, (P = 0.549) in pulmonary cases. Comparatively, we observed higher sensitivity and specificity for MPCR than GeneXpert for both smear positive and negative samples. Thus, we recommend MPCR alongside GeneXpert for the better diagnostic accuracy of PTB in a resource-limited country where tuberculosis is endemic.
C1 [Sah, Anil Kumar; Rai, Ganesh; Vaidya, Geeta Shrestha; Rai, Shiba Kumar] Shi Gan Intl Coll Sci & Technol, Kathmandu, Nepal.
   [Sah, Anil Kumar; Joshi, Bishnu; Singh, Subodh Kant; Rajbhandari, Reema; Pant, Basant] Annapurna Res Ctr, Kathmandu, Nepal.
   [Khadka, Dhruba Kumar] Natl TB Ctr, Thimi, Bhaktapur, Nepal.
   [Gupta, Birendra Prasad] Tribhuvan Univ, Cent Dept Biotechnol, Kritipur, Nepal.
   [Adhikari, Anurag] Kathmandu Res Inst Biol Sci, Mahalaxmi 19, Lalitpur, Nepal.
RP Sah, AK (通讯作者)，Shi Gan Intl Coll Sci & Technol, Kathmandu, Nepal.; Sah, AK (通讯作者)，Annapurna Res Ctr, Kathmandu, Nepal.
EM anilshah4in@gmail.com
RI joshi, bishnu/O-1385-2019; Adhikari, Anurag/H-5266-2019; Gupta, Birendra
   Prasad/I-9950-2019; Adhikari, Anurag/Z-4007-2019
OI joshi, bishnu/0000-0003-3841-0796; Adhikari, Anurag/0000-0002-6256-7884;
   Gupta, Birendra Prasad/0000-0001-6477-6260; Adhikari,
   Anurag/0000-0003-3168-0558; Sah, Anil/0000-0001-5428-8503
CR Agrawal M, 2016, J CLIN DIAGN RES, V10, pDC9, DOI 10.7860/JCDR/2016/18837.7755
   Alonso H, 2013, BMC GENOMICS, V14, DOI 10.1186/1471-2164-14-422
   Anonymous, 2009, Morbidity and Mortality Weekly Report, V58, P7
   BAESS I, 1974, ACTA PATH MICRO IM B, VB 82, P780
   BOOM R, 1990, J CLIN MICROBIOL, V28, P495, DOI 10.1128/JCM.28.3.495-503.1990
   Coros A, 2008, J BACTERIOL, V190, P3408, DOI 10.1128/JB.00009-08
   Desikan P, 2013, INDIAN J MED RES, V137, P442
   Driscoll MD, 2010, J BIOL CHEM, V285, P38270, DOI 10.1074/jbc.M110.164293
   GHOSH HK, 1978, PATHOLOGY, V10, P257, DOI 10.3109/00313027809063509
   Huh HJ, 2014, BMC INFECT DIS, V14, DOI 10.1186/s12879-014-0589-x
   Ioannidis P, 2011, J CLIN MICROBIOL, V49, P3068, DOI 10.1128/JCM.00718-11
   Iram S, 2015, PAK J MED SCI, V31, P105, DOI 10.12669/pjms.311.6970
   Kox LFF, 1997, J CLIN MICROBIOL, V35, P1492, DOI 10.1128/JCM.35.6.1492-1498.1997
   Kwak N, 2013, PLOS ONE, V8, DOI 10.1371/journal.pone.0077456
   Lawn SD, 2013, LANCET INFECT DIS, V13, P349, DOI 10.1016/S1473-3099(13)70008-2
   Mangiapan G, 1996, J CLIN MICROBIOL, V34, P1209, DOI 10.1128/JCM.34.5.1209-1215.1996
   Maurya AK, 2012, INDIAN J MED MICROBI, V30, P182, DOI 10.4103/0255-0857.96688
   Maurya AK, 2011, TUBERK TORAK, V59, P213, DOI 10.5578/tt.2680
   McEvoy CRE, 2007, TUBERCULOSIS, V87, P393, DOI 10.1016/j.tube.2007.05.010
   Millan-Lou MI, 2013, J CLIN MICROBIOL, V51, P3631, DOI 10.1128/JCM.00970-13
   Murray P, 1992, LAB DIAGNOSIS MYCOBA
   Perez-Osorio AC, 2012, J CLIN MICROBIOL, V50, P326, DOI 10.1128/JCM.05570-11
   Rachow A, 2011, PLOS ONE, V6, DOI 10.1371/journal.pone.0020458
   Sharma K, 2013, INDIAN J MED MICROBI, V31, P370, DOI 10.4103/0255-0857.118896
   Sharma K, 2013, INDIAN J MED MICROBI, V31, P24, DOI 10.4103/0255-0857.108714
   Sharma K, 2013, J GLOB INFECT DIS, V5, P49, DOI 10.4103/0974-777X.112272
   Sharma K, 2013, J OPHTHALMIC INFLAMM, V3, DOI 10.1186/1869-5760-3-25
   Sharma K, 2012, INT ORTHOP, V36, P255, DOI 10.1007/s00264-011-1241-7
   Steingart KR, 2014, COCHRANE DB SYST REV, DOI [10.1002/14651858.CD009593.pub3, 10.1002/14651858.CD009593.pub2]
   Therese KL, 2013, INDIAN J MED MICROBI, V31, P366, DOI 10.4103/0255-0857.118887
   VANSOOLINGEN D, 1991, J CLIN MICROBIOL, V29, P2578, DOI 10.1128/JCM.29.11.2578-2586.1991
   Wallis RS, 2010, LANCET, V375, P1920, DOI 10.1016/S0140-6736(10)60359-5
   World Health Organization, 2013, AUT REALT NUCL AC AM
   Zeka AN, 2011, J CLIN MICROBIOL, V49, P4138, DOI 10.1128/JCM.05434-11
   Zmak L, 2013, INT J MYCOBACT, V2, P179, DOI 10.1016/j.ijmyco.2013.05.003
NR 35
TC 6
Z9 6
U1 0
U2 12
PU SPRINGER
PI NEW YORK
PA 233 SPRING ST, NEW YORK, NY 10013 USA
SN 0343-8651
EI 1432-0991
J9 CURR MICROBIOL
JI Curr. Microbiol.
PD SEP
PY 2017
VL 74
IS 9
BP 1026
EP 1032
DI 10.1007/s00284-017-1279-x
PG 7
WC Microbiology
WE Science Citation Index Expanded (SCI-EXPANDED)
SC Microbiology
GA FC1LW
UT WOS:000406599700005
PM 28612135
DA 2022-08-20
ER

PT J
AU Phuong, NTB
   Anh, NT
   Son, NV
   Sintchenko, V
   Ho, J
   Fox, GJ
   Nhung, NV
   Marks, GB
AF Nguyen Thi Bich Phuong
   Nguyen Thu Anh
   Nguyen Van Son
   Sintchenko, Vitali
   Ho, Jennifer
   Fox, Greg J.
   Nguyen Viet Nhung
   Marks, Guy B.
TI Effect of two alternative methods of pooling sputum prior to testing for
   tuberculosis with genexpert MTB/RIF
SO BMC INFECTIOUS DISEASES
LA English
DT Article
DE Nucleic acid amplification; Diagnostic test characteristics; Sensitivity
ID XPERT MTB/RIF; PULMONARY TUBERCULOSIS; RISK
AB BackgroundPooling sputum specimens is one potential strategy for reducing the cost of using Xpert MTB/RIF, a rapid polymerase chain reaction (PCR)-based test, for the diagnosis of pulmonary tuberculosis. We sought to compare the sensitivity of two alternative method of pooling.MethodsPatients referred for assessment for TB, whose initial sputum was Xpert MTB positive, were recruited and their sputum specimens were pooled for analysis with sputum specimens that were Xpert MTB negative. Two alternative pooling strategies were employed: one in which the concentration of sample reagent (buffer) was maintained at 2:1 (standard), in accordance with the manufacturer's instructions, and another in which the concentration of sample reagent was reduced to 1:1.ResultsWe tested 101 Xpert MTB positive sputum specimens. Among these, 96% of valid test results (95% confidence interval (CI) 89-99%) were positive using the standard buffer method. Using the reduced buffer pooling method 94% of valid test results (95% CI 87-98%) were positive. McNemar's test for the difference in paired proportions did not reach statistical significance (P=0.56).ConclusionWe have confirmed that pooling of two sputum specimens for testing in a single cartridge is a valid method of reducing the number of cartridges required when using Xpert MTB to detect pulmonary tuberculosis. Two alternative pooling strategies tested here yielded similar results.Trial registrationThe present study was conducted within the Active Casefinding in Tuberculosis (ACT3) Trial. The ACT3 Trial had been registered with Australian and New Zealand Clinical Trials Register on 8th April, 2014. The trial registration number is ACTRN12614000372684. (Retrospectively registered).
C1 [Nguyen Thi Bich Phuong; Nguyen Thu Anh; Ho, Jennifer; Fox, Greg J.; Marks, Guy B.] Woolcock Inst Med Res, 298 Kim Ma St, Hanoi, Vietnam.
   [Nguyen Thu Anh; Sintchenko, Vitali; Fox, Greg J.; Marks, Guy B.] Univ Sydney, Fac Med & Hlth, Sydney, NSW, Australia.
   [Nguyen Van Son] Ctr Social Dis Control, Ca Mau, Vietnam.
   [Nguyen Van Son; Nguyen Viet Nhung] Natl TB Control Program, Hanoi, Vietnam.
   [Ho, Jennifer; Marks, Guy B.] Univ NSW, South Western Sydney Clin Sch, Sydney, NSW, Australia.
RP Phuong, NTB (通讯作者)，Woolcock Inst Med Res, 298 Kim Ma St, Hanoi, Vietnam.
EM phuong.nguyen@sydney.edu.au
RI Marks, Guy B./F-5058-2013
OI Marks, Guy B./0000-0002-8976-8053; NTB, Phuong/0000-0003-0755-6944;
   Nguyen, Thu Anh/0000-0002-2089-2902
FU Australian National Health and Medical Research Council [1045236]; CJ
   Martin Fellowship from the Australian National Health and Medical
   Research Council [1054107]
FX The project is funded by a Project grant from the Australian National
   Health and Medical Research Council (#1045236, 2013-2017). GJF received
   funding from a CJ Martin Fellowship from the Australian National Health
   and Medical Research Council (#1054107, 2013-2017). The funding body had
   no role in the design of the study and collection, analysis, and
   interpretation of data or in writing the manuscript.
CR Abdurrahman ST, 2015, J CLIN MICROBIOL, V53, P2502, DOI 10.1128/JCM.00864-15
   Banada PP, 2010, J CLIN MICROBIOL, V48, P3551, DOI 10.1128/JCM.01053-10
   Cepheid Inc. Xpert MTB/RIF, 2009, 3007810 CEPH INC
   Golub JE, 2005, INT J TUBERC LUNG D, V9, P1183
   Ho J, 2017, INT J TUBERC LUNG D, V21, P503, DOI 10.5588/ijtld.16.0846
   Ho J, 2016, LANCET INFECT DIS, V16, P1045, DOI 10.1016/S1473-3099(16)30067-6
   Lorent N, 2014, PLOS ONE, V9, DOI 10.1371/journal.pone.0092754
   Mupere E, 2013, INT J TUBERC LUNG D, V17, P207, DOI 10.5588/ijtld.12.0160
   Steingart KR, 2014, COCHRANE DB SYST REV, DOI [10.1002/14651858.CD009593.pub3, 10.1002/14651858.CD009593.pub2]
   Story A, 2012, INT J TUBERC LUNG D, V16, P1461, DOI 10.5588/ijtld.11.0773
   Zishiri V, 2015, INT J TUBERC LUNG D, V19, P87, DOI 10.5588/ijtld.14.0372
NR 11
TC 5
Z9 5
U1 0
U2 0
PU BMC
PI LONDON
PA CAMPUS, 4 CRINAN ST, LONDON N1 9XW, ENGLAND
SN 1471-2334
J9 BMC INFECT DIS
JI BMC Infect. Dis.
PD APR 27
PY 2019
VL 19
AR 347
DI 10.1186/s12879-019-3778-9
PG 4
WC Infectious Diseases
WE Science Citation Index Expanded (SCI-EXPANDED)
SC Infectious Diseases
GA HW8DO
UT WOS:000466919300006
PM 31029099
OA gold, Green Published
DA 2022-08-20
ER

PT J
AU Gebretsadik, D
   Ahmed, N
   Kebede, E
   Mohammed, M
   Belete, MA
AF Gebretsadik, Daniel
   Ahmed, Nuru
   Kebede, Edosa
   Mohammed, Miftah
   Belete, Melaku Ashagrie
TI Prevalence of Tuberculosis by Automated GeneXpert Rifampicin Assay and
   Associated Risk Factors Among Presumptive Pulmonary Tuberculosis
   Patients at Ataye District Hospital, North East Ethiopia
SO INFECTION AND DRUG RESISTANCE
LA English
DT Article
DE PTB; Ataye; MTB/RIF Xpert assay; Ethiopia
ID HIV; AREA
AB Background: Tuberculosis is a communicable disease that is a major cause of ill health, one of the top 10 causes of death worldwide, and the leading cause of death from a single infectious agent, even ranking above human immuno-deficiency virus (HIV/AIDS).
   Objective: To assess the prevalence and associated risk factor of Mycobacterium tuberculosis among pulmonary tuberculosis (PTB) suspects attending at Ataye District Hospital from October 1, 2018, to February 30, 2019.
   Methodology: A facility-based cross-sectional study was conducted among 423 presumptive tuberculosis patients at Ataye District Hospital. Sputum was processed by MTB/RIF Xpert assay. Data were entered into EpiData 3.1 software and exported to SPSS version 20.0 (SPSS, Chicago, IL, USA) for analysis. Univariate and multivariate analyses were used to examine the relationship between the dependent and independent variables. Variables that show significance at P-value of 0.3 during univariate analysis were selected for multivariable analysis. A P-value of less than or equal to 0.05 was used to indicate statistical significance.
   Results: Out of the total study participants, about 60% were male, and 39% were aged between 18 and 24 years. Of the total 423 PTB suspected patients, 38 (8.98%) of them were identified as having PTB by GeneXpert and 2/38 (5.3%) were resistant to rifampicin and 3/38 (7.89%) patients were co-infected with HIV. Participant age between 18 and 24 years and between 25 and 34 years, weight loss, chest pain, having contact history with confirmed PTB cases, utilization of congested transportation, and a history of imprisonment were significantly associated with the prevalence of PTB.
   Conclusion: A considerable prevalence of PTB in the area was observed and the magnitude of MDR-TB was low. PTB is still a public health problem in Ethiopia and there is a need for collaborative prevention and control activities in the study area.
C1 [Gebretsadik, Daniel; Kebede, Edosa; Mohammed, Miftah; Belete, Melaku Ashagrie] Wollo Univ, Coll Med & Hlth Sci, Dept Med Lab Sci, Dessie, Ethiopia.
   [Ahmed, Nuru] Ataye Dist Hosp, Ataye, Ethiopia.
RP Gebretsadik, D (通讯作者)，Wollo Univ, Coll Med & Hlth Sci, Dept Med Lab Sci, Dessie, Ethiopia.
EM gebretsadikd@gmail.com
RI Weldehanna, Daniel/ABA-8617-2020; Belete, Melaku Ashagrie/ABA-4783-2020;
   Kebede, Edosa/ABB-5672-2020
OI Weldehanna, Daniel/0000-0001-5032-5143; Belete, Melaku
   Ashagrie/0000-0002-0706-9903; KEBEDE, EDOSA/0000-0001-7006-303X;
   /0000-0002-3179-6254
CR Nugussie DA, 2017, BIOMED RES INT, V2017, DOI 10.1155/2017/6325484
   Alebachew Z., 2011, 1 ETHIOPIAN NATL POP
   Arega B, 2019, BMC INFECT DIS, V19, DOI 10.1186/s12879-019-3943-1
   Belay M, 2015, GLOBAL HEALTH ACTION, V8, P1, DOI 10.3402/gha.v8.27949
   Berju A, 2019, INT J MICROBIOL, V2019, DOI 10.1155/2019/9432469
   Chheng R, 2008, INT J TUBERC LUNG D, V12, pS54
   Diallo A, 2018, PAN AFR MED J, V30, DOI 10.11604/pamj.2018.30.293.15074
   Diande S, 2019, EUR J MICROBIOL IMMU, V9, P23, DOI 10.1556/1886.2018.00029
   Diarra B, 2016, BMC INFECT DIS, V16, DOI 10.1186/s12879-016-2060-7
   Ejeta Eyasu, 2018, J Clin Tuberc Other Mycobact Dis, V12, P14, DOI 10.1016/j.jctube.2018.06.002
   Elduma AH, 2019, EPIDEMIOL HEALTH, V41, DOI 10.4178/epih.e2019014
   Eliso E, 2015, BMC PUBLIC HEALTH, V15, DOI 10.1186/s12889-015-1411-4
   Gebrecherkos T, 2016, BMC PUBLIC HEALTH, V16, DOI 10.1186/s12889-016-3761-y
   Getahun H, 2010, CLIN INFECT DIS, V50, pS201, DOI 10.1086/651492
   Gizachew Beza Mucheye, 2017, Int J Bacteriol, V2017, P3826980, DOI 10.1155/2017/3826980
   Habte D, 2016, INT J INFECT DIS, V49, P179, DOI 10.1016/j.ijid.2016.07.002
   Hargreaves NJ, 2001, INT J TUBERC LUNG D, V5, P113
   Hiruy N, 2018, INT J INFECT DIS, V71, P4, DOI 10.1016/j.ijid.2018.03.011
   Ikuabe PO, 2018, PAN AFR MED J, V29
   Jaleta KN, 2017, INFECT DRUG RESIST, V10, P185, DOI 10.2147/IDR.S135935
   Keflie Tibebeselassie Seyoum, 2018, J Clin Tuberc Other Mycobact Dis, V12, P27, DOI 10.1016/j.jctube.2018.05.002
   Khan AS, 2018, BRAZ J MICROBIOL, V49, P909, DOI 10.1016/j.bjm.2018.02.011
   Mama Mohammedaman, 2018, Open Microbiol J, V12, P163, DOI 10.2174/1874285801812010163
   Mechal Y, 2019, BIOMED CENTRAL INFEC, V19, P1, DOI [10.1186/s12879-018-3567-x, DOI 10.1186/S12879-018-3567-X]
   Melese A, 2017, ARCH PUBLIC HEALTH, V75, DOI 10.1186/s13690-017-0204-x
   Mesfin EA, 2018, PLOS ONE, V13, DOI 10.1371/journal.pone.0197737
   Mulu Wondemagegn, 2017, BMC Res Notes, V10, P8, DOI 10.1186/s13104-016-2328-4
   Parrish NM, 2011, J CLIN MICROBIOL, V49, P772, DOI 10.1128/JCM.02451-10
   Semunigus T, 2016, ANN CLIN MICROB ANTI, V15, DOI 10.1186/s12941-016-0165-x
   Sinshaw W, 2019, BMC INFECT DIS, V19, DOI 10.1186/s12879-019-4241-7
   Taddese B, 2018, J MICROBIOL BIOCH TE, V10, P12, DOI [10.4172/1948-5, DOI 10.4172/1948-5948.1000388]
   Teweldemedhin M, 2018, BMC INFECT DIS, V18, DOI 10.1186/s12879-018-3604-9
   Tulu Begna, 2014, BMC Res Notes, V7, P285, DOI 10.1186/1756-0500-7-285
   Wondimeneh Yitayih, 2012, BMC Res Notes, V5, P331, DOI 10.1186/1756-0500-5-331
   World Health Organization, 2019, GLOB TUB REP
   World Health Organization, 2014, XPERT MTB RIF IMPL M
   World Health Organization, 2017, GLOB WORLD TUB REP 2
NR 37
TC 4
Z9 4
U1 1
U2 2
PU DOVE MEDICAL PRESS LTD
PI ALBANY
PA PO BOX 300-008, ALBANY, AUCKLAND 0752, NEW ZEALAND
SN 1178-6973
J9 INFECT DRUG RESIST
JI Infect. Drug Resistance
PY 2020
VL 13
BP 1507
EP 1516
DI 10.2147/IDR.S248059
PG 10
WC Infectious Diseases; Pharmacology & Pharmacy
WE Science Citation Index Expanded (SCI-EXPANDED)
SC Infectious Diseases; Pharmacology & Pharmacy
GA LP9ET
UT WOS:000534619500001
PM 32547120
OA Green Published, gold
DA 2022-08-20
ER

PT J
AU Thwe, PM
   Ren, P
AF Thwe, P. M.
   Ren, P.
TI Evaluation of GeneXpert MTB/RIF Assay for Rapid Diagnosis of
   Extrapulmonary Tuberculosis in a Low-Prevalence Setting
SO JOURNAL OF MOLECULAR DIAGNOSTICS
LA English
DT Meeting Abstract
CT Annual Meeting of the Association-for-Molecular-Pathology (AMP)
CY NOV 07-09, 2019
CL Baltimore, MD
SP Assoc Mol Pathol
C1 [Thwe, P. M.; Ren, P.] Univ Texas Med Branch, Galveston, TX 77555 USA.
NR 0
TC 0
Z9 0
U1 0
U2 0
PU ELSEVIER SCIENCE INC
PI NEW YORK
PA STE 800, 230 PARK AVE, NEW YORK, NY 10169 USA
SN 1525-1578
EI 1943-7811
J9 J MOL DIAGN
JI J. Mol. Diagn.
PD NOV
PY 2019
VL 21
IS 6
MA ID014
BP 1156
EP 1157
PG 2
WC Pathology
WE Science Citation Index Expanded (SCI-EXPANDED); Conference Proceedings Citation Index - Science (CPCI-S)
SC Pathology
GA JN6HH
UT WOS:000496996500135
DA 2022-08-20
ER

PT J
AU Phuong, NTB
   Anh, NT
   Khanh, LB
   Oanh, LTT
   Son, NV
   Hoa, NB
   Linh, NN
   Fox, GJ
   Nhung, NV
   Marks, GB
AF Nguyen Thi Bich Phuong
   Nguyen Thu Anh
   Luu Boi Khanh
   Le Thi Tu Oanh
   Nguyen Van Son
   Nguyen Binh Hoa
   Nguyen Nhat Linh
   Fox, Greg J.
   Nguyen Viet Nhung
   Marks, Guy B.
TI THE ROLE OF DIGITAL CHEST RADIOGRAPHY AND GENEXPERT MTB/RIF IN
   COMMUNITY-WIDE ACTIVE CASE FINDING FOR TUBERCULOSIS
SO RESPIROLOGY
LA English
DT Meeting Abstract
C1 [Nguyen Thi Bich Phuong; Nguyen Thu Anh; Luu Boi Khanh; Le Thi Tu Oanh; Fox, Greg J.; Marks, Guy B.] Woolcock Inst Med Res, Hanoi, Vietnam.
   [Marks, Guy B.] Univ New South Wales, Sydney, NSW, Australia.
   [Nguyen Thu Anh; Fox, Greg J.; Nguyen Viet Nhung; Marks, Guy B.] Univ Sydney, Sydney, NSW, Australia.
   [Nguyen Binh Hoa; Nguyen Viet Nhung] Natl Lung Hosp, Hanoi, Vietnam.
   [Nguyen Van Son; Nguyen Binh Hoa; Nguyen Viet Nhung] Natl TB Program, Hanoi, Vietnam.
   [Nguyen Van Son] Ctr Social Dis Prevent, Ca Mau, Vietnam.
   [Nguyen Nhat Linh] WHO, Geneva, Switzerland.
RI Nguyen, Linh/AHD-5726-2022; Marks, Guy B./F-5058-2013
OI Nguyen, Linh/0000-0003-4820-6967; Marks, Guy B./0000-0002-8976-8053
NR 0
TC 0
Z9 0
U1 0
U2 0
PU WILEY
PI HOBOKEN
PA 111 RIVER ST, HOBOKEN 07030-5774, NJ USA
SN 1323-7799
EI 1440-1843
J9 RESPIROLOGY
JI Respirology
PD NOV
PY 2019
VL 24
SU 2
MA AO1534
BP 30
EP 31
PG 2
WC Respiratory System
WE Science Citation Index Expanded (SCI-EXPANDED)
SC Respiratory System
GA LK9DC
UT WOS:000531157100066
DA 2022-08-20
ER

PT J
AU Manyepa, M
   Rogena, E
   Oyugi, J
   Rioki, J
   Ngayo, MO
AF Manyepa, Mespa
   Rogena, Emily
   Oyugi, Julias
   Rioki, Josephine
   Ngayo, Musa Otieno
TI Utility of GeneXpert and Cytomorphology in the Diagnosis of
   Extrapulmonary Tuberculosis at Kenyatta National Hospital in Kenya
SO AMERICAN JOURNAL OF CLINICAL PATHOLOGY
LA English
DT Meeting Abstract
C1 [Manyepa, Mespa; Rogena, Emily; Oyugi, Julias; Rioki, Josephine; Ngayo, Musa Otieno] Ndola Teaching Hosp, Ndola, Zambia.
NR 0
TC 0
Z9 0
U1 0
U2 0
PU OXFORD UNIV PRESS INC
PI CARY
PA JOURNALS DEPT, 2001 EVANS RD, CARY, NC 27513 USA
SN 0002-9173
EI 1943-7722
J9 AM J CLIN PATHOL
JI Am. J. Clin. Pathol.
PD OCT
PY 2018
VL 150
SU 1
BP S78
EP S78
DI 10.1093/ajcp/aqy094.188
PG 1
WC Pathology
WE Science Citation Index Expanded (SCI-EXPANDED)
SC Pathology
GA VJ1NR
UT WOS:000540220200189
OA Bronze
DA 2022-08-20
ER

PT J
AU Shah, R
   Uppe, A
   Nair, G
   Sharma, A
   Patel, S
   Ravindran, J
AF Shah, Ria
   Uppe, Abhay
   Nair, Girija
   Sharma, Aarti
   Patel, Shahid
   Ravindran, Jayamol
TI Comparison studies of GENEXPERT versus MGIT culture of Bronchial Lavage
   in sputum smear negative suspected Pulmonary Tuberculosis
SO EUROPEAN RESPIRATORY JOURNAL
LA English
DT Meeting Abstract
CT European-Respiratory-Society (ERS) International Congress
CY SEP 09-13, 2017
CL Milan, ITALY
SP European Respiratory Soc
NR 0
TC 0
Z9 0
U1 0
U2 0
PU EUROPEAN RESPIRATORY SOC JOURNALS LTD
PI SHEFFIELD
PA 442 GLOSSOP RD, SHEFFIELD S10 2PX, ENGLAND
SN 0903-1936
EI 1399-3003
J9 EUR RESPIR J
JI Eur. Resp. J.
PD SEP 1
PY 2017
VL 50
SU 61
MA PA2743
DI 10.1183/1393003.congress-2017.PA2743
PG 2
WC Respiratory System
WE Science Citation Index Expanded (SCI-EXPANDED); Conference Proceedings Citation Index - Science (CPCI-S)
SC Respiratory System
GA GF2DO
UT WOS:000431748902270
DA 2022-08-20
ER

PT J
AU Bojang, AL
   Mendy, FS
   Tientcheu, LD
   Otu, J
   Antonio, M
   Kampmann, B
   Agbla, S
   Sutherland, JS
AF Bojang, Adama L.
   Mendy, Francis S.
   Tientcheu, Leopold D.
   Otu, Jacob
   Antonio, Martin
   Kampmann, Beate
   Agbla, Schadrac
   Sutherland, Jayne S.
TI Comparison of TB-LAMP, GeneXpert MTB/RIF and culture for diagnosis of
   pulmonary tuberculosis in The Gambia
SO JOURNAL OF INFECTION
LA English
DT Article
DE Tuberculosis; Diagnosis; TB-LAMP; GeneXpert; Sputum culture; Gambia;
   West Africa
ID BACTEC MGIT 960; MYCOBACTERIUM-TUBERCULOSIS; ASSAY
AB Background: Diagnosis of tuberculosis (TB) remains difficult, particularly in resource-limited settings. The development of nucleic acid-based tests for detection of Mycobacterium tuberculosis complex (MTBC) has significantly increased sensitivity compared to conventional smear microscopy and provides results within a matter of hours compared to weeks for the current gold-standard, liquid culture.
   Methods: In this study we performed side-by-side comparison of mycobacterial detection assays on sputum samples from 285 subjects presenting with symptoms suggestive of TB in The Gambia and a cross-sectional cohort of 156 confirmed TB patients with a median of 2 months of treatment. A novel assay, Loop-Mediated Amplification test for TB (TB-LAMP), was compared to smear microscopy, MGIT culture and GeneXpert MTB/RIF for all samples.
   Results: When culture was used as the reference standard, we found an overall sensitivity for TB-LAMP of 99% (95% CI: 94.5-99.8) and specificity of 94% (95% CI: 89.3-96.7). When latent class analysis was performed, TB-LAMP had 98.6% (95% CI: 95.9-100) sensitivity and 99% (95% CI: 98.2-100) specificity compared to 91.1% (95% CI: 86.1-96) sensitivity and 100% (95% CI: 98.2-100) specificity for MGIT culture. GeneXpert had the highest sensitivity 99.1% (95% CI: 97.1-100) but the lowest specificity 96% (95% CI: 92.6-98.3). Both TB-LAMP and GeneXpert showed high sensitivity and specificity regardless of age or strain of infection.
   Conclusion: Our findings show the diagnostic utility of both GeneXpert and TB-LAMP in The Gambia. Whilst TB-LAMP requires less infrastructure, it is unable to detect drug-resistant patterns and therefore would be most suitable as a screening test for new TB cases in peripheral health clinics. (C) 2015 The British Infection Association. Published by Elsevier Ltd. All rights reserved.
C1 [Bojang, Adama L.; Mendy, Francis S.; Tientcheu, Leopold D.; Otu, Jacob; Antonio, Martin; Kampmann, Beate; Agbla, Schadrac; Sutherland, Jayne S.] MRC, Vaccines & Immun Theme, Fajara, Gambia.
RP Sutherland, JS (通讯作者)，MRC Unit, POB 273, Banjul, Gambia.
EM jsutherland@mrc.gm
RI ; Tientcheu Djomkam, Leopold/U-5163-2017
OI Sutherland, Jayne/0000-0002-7083-4997; Tientcheu Djomkam,
   Leopold/0000-0002-2189-3501; Kampmann, Beate/0000-0002-6546-4709
FU Foundation for Innovative Diagnostics (FIND); Medical Research Council
   [MC_UP_A900_1122, MC_EX_MR/K011944/1, MC_U190074190, MC_U190071468,
   MC_U190081991] Funding Source: researchfish; National Institute for
   Health Research [SRF-2009-02-07] Funding Source: researchfish; MRC
   [MC_EX_MR/K011944/1, MC_U190071468, MC_U190081991, MC_UP_A900_1122,
   MC_U190074190] Funding Source: UKRI
FX The authors thank all study participants, TB diagnostic laboratory staff
   and TB clinic staff. This study was funded by the Foundation for
   Innovative Diagnostics (FIND) as part of a larger multi-site study.
CR [Anonymous], 2013, US LOOP MED IS AMPL
   Boehme CC, 2011, LANCET, V377, P1495, DOI 10.1016/S0140-6736(11)60438-8
   Gehre F, 2013, EMERG INFECT DIS, V19, P1598, DOI 10.3201/eid1910.121023
   Hanna BA, 1999, J CLIN MICROBIOL, V37, P748, DOI 10.1128/JCM.37.3.748-752.1999
   Kumar P, 2014, J INFECTION, V69, P607, DOI 10.1016/j.jinf.2014.08.017
   Li Q, 2014, PLOS ONE, V9
   Mitarai S, 2011, INT J TUBERC LUNG D, V15, P1211, DOI 10.5588/ijtld.10.0629
   Otu J, 2008, J INFECT DEV COUNTR, V2, P200
   Pandey BD, 2008, J MED MICROBIOL, V57, P439, DOI 10.1099/jmm.0.47499-0
   Piatek AS, 2013, GLOB HEALTH-SCI PRAC, V1, P18, DOI 10.9745/GHSP-D-12-00004
   Steingart K, 2006, LANCET INFECT DIS, V6, P570, DOI 10.1016/S1473-3099(06)70578-3
   Rabna P, 2015, PLOS ONE, V10, DOI 10.1371/journal.pone.0127536
   Tientcheu LD, 2014, EUR J IMMUNOL, V44, P1387, DOI 10.1002/eji.201343956
   Togun TO, 2015, INT J TUBERC LUNG D, V19, P1091, DOI 10.5588/ijtld.15.0228
   Vassall A, 2011, PLOS MED, V8, DOI 10.1371/journal.pmed.1001120
   Whitelaw A, 2009, TUBERCULOSIS COMPREH, P164
   WHO, WHO GLOB TUB REP 201
NR 17
TC 33
Z9 38
U1 1
U2 12
PU W B SAUNDERS CO LTD
PI LONDON
PA 32 JAMESTOWN RD, LONDON NW1 7BY, ENGLAND
SN 0163-4453
EI 1532-2742
J9 J INFECTION
JI J. Infect.
PD MAR
PY 2016
VL 72
IS 3
BP 332
EP 337
DI 10.1016/j.jinf.2015.11.011
PG 6
WC Infectious Diseases
WE Science Citation Index Expanded (SCI-EXPANDED)
SC Infectious Diseases
GA DG2XW
UT WOS:000371935100008
PM 26724771
DA 2022-08-20
ER

PT J
AU Liu, RM
   Liang, Q
   Shang, YY
   Ma, YF
   Wang, F
   Dong, LL
   Huang, HR
   Gao, MQ
   Pang, Y
AF Liu, Rongmei
   Liang, Qian
   Shang, Yuanyuan
   Ma, Yifeng
   Wang, Fen
   Dong, Lingling
   Huang, Hairong
   Gao, Mengqiu
   Pang, Yu
TI GeneXpert of stool versus gastric lavage fluid for the diagnosis of
   pulmonary tuberculosis in severely ill adults
SO INFECTION
LA English
DT Article
DE Mycobacterium tuberculosis; Severe tuberculosis; Stool; GeneXpert
ID XPERT MTB/RIF; MYCOBACTERIUM-TUBERCULOSIS; ASSAY; SPECIMENS; SPUTUM
AB PurposeStool is an alternative specimen matrix for tuberculosis (TB) tests, because Mycobacterium tuberculosis (MTB) can be swallowed and detected in the samples from digestive tract. We aimed to assess the performance of GeneXpert on stool and gastric lavage fluid (GALF) in diagnosing TB among patients with severe pulmonary TB.MethodsWe enrolled adults with suspected pulmonary TB who were unable to produce sputum at visit between January 2016 and June 2018. Bacteriological samples consisted of one transtracheal aspirate sputum specimen, one stool specimen and/or one gastric lavage fluid specimen. Bacterial culture of transtracheal aspirate sputum provided the gold standard.ResultsOf 65 individuals recruited for analysis, MGIT culture identified the presence of MTB in 32 samples. Overall, 29 of 32 stool samples from culture-positive cases were detected by the GeneXpert test, demonstrating a sensitivity of 90.6%. For GALF, 13 patients were detected as infected with MTB by GeneXpert, yielding a sensitivity of 56.5%. The statistical analysis revealed that GeneXpert showed significantly better sensitivity in detecting MTB from stool samples than GALF samples (P=0.003). Among individuals with GeneXpert-positive stool, the percentage of individuals with comorbid diabetes was significantly higher than among individuals with GeneXpert-negative stool (19.4% vs. 2.9%, P=0.034).ConclusionsIn conclusion, our data reveal that GeneXpert provides a higher detection rate on stool compared to GALF, indicating stool should be considered as an alternative for adult TB patients unable to produce sputum. Individuals with diabetes are more likely to have positive GeneXpert stool than nondiabetic individuals.
C1 [Liu, Rongmei; Gao, Mengqiu] Capital Med Univ, Beijing Chest Hosp, Beijing TB & Thorac Tumor Res Inst, TB Dept, 97 Machang, Beijing 101149, Peoples R China.
   [Liang, Qian; Shang, Yuanyuan; Ma, Yifeng; Wang, Fen; Dong, Lingling; Huang, Hairong; Pang, Yu] Capital Med Univ, Beijing Chest Hosp, Beijing TB & Thorac Tumor Res Inst, 97 Machang, Beijing 101149, Peoples R China.
RP Gao, MQ (通讯作者)，Capital Med Univ, Beijing Chest Hosp, Beijing TB & Thorac Tumor Res Inst, TB Dept, 97 Machang, Beijing 101149, Peoples R China.; Huang, HR; Pang, Y (通讯作者)，Capital Med Univ, Beijing Chest Hosp, Beijing TB & Thorac Tumor Res Inst, 97 Machang, Beijing 101149, Peoples R China.
EM hairong.huangcn@gmail.com; gaomqwdm@aliyun.com; pangyupound@163.com
FU Beijing Municipal Administration of Hospitals' Youth Programme
   [QML20171601]; Chinese Clinical Trial Cooperation Support Programme
   [2018KYJJ002]
FX This work was supported by the Beijing Municipal Administration of
   Hospitals' Youth Programme (QML20171601), and the Chinese Clinical Trial
   Cooperation Support Programme (2018KYJJ002).
CR [Anonymous], 2014, XPERT MTB RIF ASS DI
   Aslam W, 2017, PUBLIC HEALTH ACTION, V7, P141, DOI 10.5588/pha.16.0126
   Banada PP, 2016, PLOS ONE, V11, DOI 10.1371/journal.pone.0151980
   Blakemore R, 2010, J CLIN MICROBIOL, V48, P2495, DOI 10.1128/JCM.00128-10
   Cordova J, 2010, J CLIN MICROBIOL, V48, P1820, DOI 10.1128/JCM.01161-09
   Jeon CY, 2008, PLOS MED, V5, P1091, DOI 10.1371/journal.pmed.0050152
   Larson JL, 2001, AM J RESP CRIT CARE, V163, P1279, DOI 10.1164/ajrccm.163.5.1635f
   Nahid Payam, 2006, Proc Am Thorac Soc, V3, P103, DOI 10.1513/pats.200511-119JH
   Nicol MP, 2013, CLIN INFECT DIS, V57, pE18, DOI 10.1093/cid/cit230
   Orikiriza P, 2018, EUR J CLIN MICROBIOL
   Pai M, 2015, J INFECT DIS, V211, pS21, DOI 10.1093/infdis/jiu803
   Pang Y, 2014, PEDIATR INFECT DIS J, V33, P1047, DOI 10.1097/INF.0000000000000403
   Podell BK, 2014, AM J PATHOL, V184, P1104, DOI 10.1016/j.ajpath.2013.12.015
   Rahman SMM, 2018, PLOS ONE, V13, DOI 10.1371/journal.pone.0203063
   Ronacher K, 2015, IMMUNOL REV, V264, P121, DOI 10.1111/imr.12257
   Jimenez MR, 2013, BMC INFECT DIS, V13, DOI 10.1186/1471-2334-13-222
   Tan Y, 2017, EUR J CLIN MICROBIOL, V36, P779, DOI 10.1007/s10096-016-2859-6
   Tan YJ, 2017, SCI REP-UK, V7, DOI 10.1038/s41598-017-03473-7
   Walters E, 2017, PEDIATR INFECT DIS J, V36, P837, DOI 10.1097/INF.0000000000001563
   Wolf H, 2008, AM J TROP MED HYG, V79, P893, DOI 10.4269/ajtmh.2008.79.893
   World Health Organization, 2021, GLOBAL TUBERCULOSIS
NR 21
TC 1
Z9 2
U1 1
U2 6
PU SPRINGER HEIDELBERG
PI HEIDELBERG
PA TIERGARTENSTRASSE 17, D-69121 HEIDELBERG, GERMANY
SN 0300-8126
EI 1439-0973
J9 INFECTION
JI Infection
PD AUG
PY 2019
VL 47
IS 4
BP 611
EP 616
DI 10.1007/s15010-019-01295-5
PG 6
WC Infectious Diseases
WE Science Citation Index Expanded (SCI-EXPANDED)
SC Infectious Diseases
GA IL0TG
UT WOS:000477012200010
PM 30905032
DA 2022-08-20
ER

PT J
AU Goussard, P
   Walters, E
   Bosch, C
   Gie, PR
   Hesseling, A
AF Goussard, Pierre
   Walters, E.
   Bosch, C.
   Gie, P. R.
   Hesseling, Anneke
TI Factors that predict for positive GeneXpert MTB/RIF on bronchoalveolar
   lavage samples in children with suspected tuberculosis
SO EUROPEAN RESPIRATORY JOURNAL
LA English
DT Meeting Abstract
DE Tuberculosis - diagnosis; Bronchoscopy; Children
RI WALTERS, Eugene/AAL-2264-2021
NR 0
TC 0
Z9 0
U1 0
U2 0
PU EUROPEAN RESPIRATORY SOC JOURNALS LTD
PI SHEFFIELD
PA 442 GLOSSOP RD, SHEFFIELD S10 2PX, ENGLAND
SN 0903-1936
EI 1399-3003
J9 EUR RESPIR J
JI Eur. Resp. J.
PD SEP
PY 2014
VL 44
SU 58
MA 4653
PG 4
WC Respiratory System
WE Science Citation Index Expanded (SCI-EXPANDED)
SC Respiratory System
GA V45SS
UT WOS:000209836903173
DA 2022-08-20
ER

PT J
AU Terzi, HA
   Aydemir, O
   Karakece, E
   Koroglu, M
   Altindis, M
AF Terzi, Huseyin A.
   Aydemir, Ozlem
   Karakece, Engin
   Koroglu, Mehmet
   Altindis, Mustafa
TI Comparison of the GeneXpert (R) MTB/RIF Test and Conventional Methods in
   the Diagnosis of Mycobacterium tuberculosis
SO CLINICAL LABORATORY
LA English
DT Article
DE GeneXpert MTB/RIF; Mycobacterium tuberculosis; rifampicin resistance;
   rapid diagnosis; Bactec MGIT 960
ID XPERT MTB/RIF; RIFAMPICIN RESISTANCE; ASSAY
AB Background: The objective of this study is to evaluate the performance of the GeneXpert MTB/RIF system in Mycobacterium tuberculosis (MTB) diagnosis and the detection of rifampicin resistance in pulmonary and extrapulmonary clinical samples.
   Methods: A total of 849 samples (611 pulmonary and 238 extrapulmonary), which were sent to the laboratory of our hospital on suspicion of MTB, were included in the study. The samples cultured on Lowenstein Jensen medium and Mycobacteria Growth Indicator Tubes. All samples were also tested with the GeneXpert MTB/RIF test. The drug susceptibility test was determined using the Bactec MGIT 960 system.
   Results: MTB grew in the culture in 84 (9.8%) of all samples, and 78 (9.1%) were found to be positive by the GeneXpert MTB/RIF test, while acid-fast bacillus (AFB), MTB/RIF test, and culture positivity were 41 (6.7%), 74 (12.1%), and 75 (12.3%), respectively, in pulmonary samples, and these values were found to be 2 (0.8%), 4 (1.7%), and 9 (3.8%), respectively, in extrapulmonary samples. In the automated culture and susceptibility system, rifampicin resistance was detected in only one of 84 (2.6%) isolated strains. This resistant strain was also identified by the GeneXpert MTB/RIF test. According to the culture results of all samples examined, the sensitivity of the GeneXpert MTB/RIF test was calculated as 83.3%, specificity as 98.9%, PPV as 89.7%, and NPV as 98.1%.
   Conclusions: The GeneXpert MTB/RIF test used in the study was found to be highly successful, very quick, and requiring low workload in pulmonary samples and extrapulmonary samples in terms of sensitivity and specificity. It was observed that it can be used safely due to its high sensitivity, especially in AFB-positive samples.
C1 [Terzi, Huseyin A.; Aydemir, Ozlem; Karakece, Engin] Sakarya Univ, Res Training Hosp, Dept Microbiol, Sakarya, Turkey.
   [Koroglu, Mehmet; Altindis, Mustafa] Sakarya Univ, Sch Med, Dept Microbiol, Sakarya, Turkey.
RP Terzi, HA (通讯作者)，Sakarya Univ Training & Res Hosp, Dept Microbiol, Sakarya, Turkey.
EM agah.terzi@yahoo.com
RI Altindis, Mustafa/O-8413-2019
OI Altindis, Mustafa/0000-0003-0411-9669
CR Boehme CC, 2011, LANCET, V377, P1495, DOI 10.1016/S0140-6736(11)60438-8
   Boehme CC, 2010, NEW ENGL J MED, V363, P1005, DOI 10.1056/NEJMoa0907847
   Bojang AL, 2016, J INFECTION, V72, P332, DOI 10.1016/j.jinf.2015.11.011
   Bunsow E, 2014, J INFECTION, V68, P338, DOI 10.1016/j.jinf.2013.11.012
   Cavusoglu C, 2014, TURK MIKROBIYOL CEM, V44, P61, DOI [10.5222/TMCD.2014.061, DOI 10.5222/TMCD.2014.061]
   Celik C, 2015, TURK J MED SCI, V45, P1329, DOI 10.3906/sag-1407-56
   Chang K, 2012, J INFECTION, V64, P580, DOI 10.1016/j.jinf.2012.02.012
   Ciftci IH, 2011, MIKROBIYOL BUL, V45, P43
   Gursoy NC, 2016, MIKROBIYOL BUL, V50, P196, DOI 10.5578/mb.21033
   Hillemann D, 2011, J CLIN MICROBIOL, V49, P1202, DOI 10.1128/JCM.02268-10
   Ioannidis P, 2011, J CLIN MICROBIOL, V49, P3068, DOI 10.1128/JCM.00718-11
   Kalokhe AS, 2013, AM J MED SCI, V345, P143, DOI 10.1097/MAJ.0b013e31825d32c6
   Khalil KF, 2015, JCPSP-J COLL PHYSICI, V25, P115, DOI 02.2015/JCPSP.115118
   Kwak N, 2013, PLOS ONE, V8, DOI 10.1371/journal.pone.0077456
   Lawn SD, 2011, FUTURE MICROBIOL, V6, P1067, DOI [10.2217/fmb.11.84, 10.2217/FMB.11.84]
   Marlowe EM, 2011, J CLIN MICROBIOL, V49, P1621, DOI 10.1128/JCM.02214-10
   Matabane MMZ, 2015, BMC INFECT DIS, V15, DOI 10.1186/s12879-015-1229-9
   Maynard-Smith L, 2014, BMC INFECT DIS, V14, DOI 10.1186/s12879-014-0709-7
   Nhu NTQ, 2014, J CLIN MICROBIOL, V52, P226, DOI 10.1128/JCM.01834-13
   Singh UB, 2016, PLOS ONE, V11, DOI 10.1371/journal.pone.0149258
   Theron G, 2014, SCI REP-UK, V4, DOI 10.1038/srep05658
   Tortoli E, 2012, EUR RESPIR J, V40, P442, DOI 10.1183/09031936.00176311
   Van Rie A, 2012, INT J TUBERC LUNG D, V16, P206, DOI 10.5588/ijtld.11.0395
   Walusimbi S, 2013, BMC INFECT DIS, V13, DOI 10.1186/1471-2334-13-507
   World Health Organization, GLOB TUB REP 2015
   Zignol M, 2011, CLIN INFECT DIS, V52, P901, DOI 10.1093/cid/cir081
NR 26
TC 4
Z9 4
U1 0
U2 7
PU CLIN LAB PUBL
PI HEIDELBERG
PA IM BREITSPIEL 15, HEIDELBERG, D-69126, GERMANY
SN 1433-6510
J9 CLIN LAB
JI Clin. Lab.
PY 2019
VL 65
IS 1-2
BP 1
EP 6
DI 10.7754/Clin.Lab.2018.180613
PG 6
WC Medical Laboratory Technology
WE Science Citation Index Expanded (SCI-EXPANDED)
SC Medical Laboratory Technology
GA HK3YS
UT WOS:000457856100001
PM 30775890
DA 2022-08-20
ER

PT J
AU Walters, E
   Goussard, P
   Bosch, C
   Hesseling, AC
   Gie, RP
AF Walters, Elisabetta
   Goussard, Pierre
   Bosch, Corne
   Hesseling, Anneke C.
   Gie, Robert P.
TI GeneXpert MTB/RIF on Bronchoalveolar Lavage Samples in Children With
   Suspected Complicated Intrathoracic Tuberculosis: A Pilot Study
SO PEDIATRIC PULMONOLOGY
LA English
DT Article
DE complicated tuberculosis; rapid diagnosis; bronchoscopy; children
ID PULMONARY TUBERCULOSIS; CHILDHOOD TUBERCULOSIS; DIAGNOSIS; ACCURACY
AB BackgroundChildren with complicated intrathoracic tuberculosis (TB) require rapid confirmation of TB diagnosis and of drug susceptibility to institute appropriate therapy. In a pilot study, we evaluated the feasibility and potential utility of GeneXpert (Xpert) on bronchoalveolar lavage (BAL) samples in children undergoing routine diagnostic bronchoscopy.
   MethodsWe included children <13 years of age undergoing bronchoscopy for suspected complicated intrathoracic TB at Tygerberg Children's Hospital, October 1, 2012-May 15, 2013. A minimum of two respiratory specimens in addition to BAL were obtained from each child. In addition to fluorescent smear microscopy and automated liquid culture performed on all samples, BAL samples were analyzed by Xpert. Drug susceptibility was confirmed by GenoType (R) MTBDRplus.
   ResultsFourteen children (2 HIV positive, median age 16 months) were included. The Mantoux tuberculin skin test was positive in 11. On chest radiograph, six children had expansile pneumonia and nine had airway compression (one had both). The median duration of TB treatment before bronchoscopy was 8 days. TB was confirmed by either culture or Xpert from any sample in 11 (78%) children. Among 9/14 (64%) cases confirmed by culture, BAL Xpert was positive in 7 (78% sensitivity); in addition, Xpert confirmed 2 cases who had negative culture (14% additional diagnostic yield). Two drug resistant cases were identified: one by BAL Xpert and one from genotypic testing of a culture from gastric aspirate. All children were initiated on anti-TB treatment and responded well to therapy.
   ConclusionBAL Xpert resulted in additional diagnostic yield and also in the rapid detection of drug resistance in children with complicated intrathoracic TB. The clinical impact of this modality should be further evaluated in children. Pediatr Pulmonol. 2014; 49:1133-1137. (c) 2013 Wiley Periodicals, Inc.
C1 [Walters, Elisabetta; Bosch, Corne; Hesseling, Anneke C.; Gie, Robert P.] Univ Stellenbosch, Dept Paediat & Child Hlth, Desmond Tutu TB Ctr, Fac Med & Hlth Sci, Cape Town, South Africa.
   [Goussard, Pierre; Gie, Robert P.] Univ Stellenbosch, Tygerberg Acad Hosp, Dept Paediat & Child Hlth, Div Paediat Pulmonol,Fac Med & Hlth Sci, Cape Town, South Africa.
RP Walters, E (通讯作者)，Univ Stellenbosch, Dept Paediat & Child Hlth, Desmond Tutu TB Ctr, Fac Med & Hlth Sci, Cape Town, South Africa.
EM ewal@sun.ac.za
CR Abadco DL, PEDIAT INFECT DIS J, V11, P735
   de Blic J, 2000, EUR RESPIR J, V15, P217
   Goussard P, 2013, PEDIATR PULM, V48, P1000, DOI 10.1002/ppul.22747
   Helb D, 2010, J CLIN MICROBIOL, V48, P229, DOI 10.1128/JCM.01463-09
   Lee HY, 2013, INT J TUBERC LUNG D, V17, P917, DOI 10.5588/ijtld.12.0885
   Marais BJ, 2006, CLIN INFECT DIS, V42, pE69, DOI 10.1086/502652
   Nicol MP, 2011, LANCET INFECT DIS, V11, P819, DOI 10.1016/S1473-3099(11)70167-0
   Rachow A, 2012, CLIN INFECT DIS, V54, P1388, DOI 10.1093/cid/cis190
   Singh M, 2000, Indian Pediatr, V37, P947
   SOMU N, 1995, TUBERCLE LUNG DIS, V76, P295, DOI 10.1016/S0962-8479(05)80027-9
   Steingart KR, 2013, COCHRANE DB SYST REV, DOI 10.1002/14651858.CD009593.pub2
   Theart AC, 2005, INT J TUBERC LUNG D, V9, P1210
   Zar HJ, 2012, CLIN INFECT DIS, V55, P1088, DOI 10.1093/cid/cis598
NR 13
TC 34
Z9 40
U1 1
U2 5
PU WILEY
PI HOBOKEN
PA 111 RIVER ST, HOBOKEN 07030-5774, NJ USA
SN 8755-6863
EI 1099-0496
J9 PEDIATR PULM
JI Pediatr. Pulmonol.
PD NOV
PY 2014
VL 49
IS 11
BP 1133
EP 1137
DI 10.1002/ppul.22970
PG 5
WC Pediatrics; Respiratory System
WE Science Citation Index Expanded (SCI-EXPANDED)
SC Pediatrics; Respiratory System
GA AS3KE
UT WOS:000344175400011
PM 24339262
DA 2022-08-20
ER

PT J
AU Aricha, SA
   Kingwara, L
   Mwirigi, NW
   Chaba, L
   Kiptai, T
   Wahogo, J
   Otwabe, JS
   Onyango, PO
   Karanja, M
   Ayieko, C
   Matu, SW
AF Aricha, S. A.
   Kingwara, L.
   Mwirigi, N. W.
   Chaba, L.
   Kiptai, T.
   Wahogo, J.
   Otwabe, J. S.
   Onyango, P. O.
   Karanja, M.
   Ayieko, C.
   Matu, S. W.
TI Comparison of GeneXpert and line probe assay for detection of
   Mycobacterium tuberculosis and rifampicin-mono resistance at the
   National Tuberculosis Reference Laboratory, Kenya
SO BMC INFECTIOUS DISEASES
LA English
DT Article
DE LPA; GeneXpert; Sensitivity; Specificity; Drug-resistant TB
ID DRUG-RESISTANCE; RAPID DETECTION; TB; MTB/RIF; HIV
AB BackgroundThe dual challenge of low diagnostic sensitivity of microscopy test and technical challenge of performing a TB culture test poses a problem for case detection and initiation of Tuberculosis (TB) second-line treatment. There is thus need for a rapid, reliable and easily accessible assay. This comparative analysis was performed to assess diagnostic performance characteristics of GeneXpert MTB/RIF and Line Probe Assay (LPA).MethodsThree hundred twenty nine sputum samples of patients across the 47 counties in Kenya suspected to have drug resistant TB were picked and subjected to GeneXpert, LPA and Culture MGIT at the National TB Reference Laboratory. Sensitivity, specificity and predictive values were then determined to assess the performance characteristics of the various assays.ResultsAgainst culture MGIT as the gold standard for TB diagnosis, GeneXpert had a sensitivity, specificity, positive predictive value, and negative predictive value of 78.5, 64.9, 59.4 and 82.2% respectively while LPA had 98.4, 66.0, 65.4 and 98.4%. For diagnosis of rifampicin mono-resistance GeneXpert had a moderate agreement (Kappa 0.59, P<0.01) (sensitivity 62.50%, specificity 96.50%) while LPA that had almost perfect agreement (Kappa=0.89, p<0.01) with a (sensitivity 90.0% and specificity 99.1%).ConclusionLPA has a better performance characteristic to GeneXpert and an alternative to culture with regards to detection of RIF's mono-resistance.
C1 [Aricha, S. A.; Onyango, P. O.; Ayieko, C.] Maseno Univ, Sch Phys & Biol Sci, Kisumu, Kenya.
   [Aricha, S. A.; Kingwara, L.; Mwirigi, N. W.; Wahogo, J.] Natl Publ Hlth Labs, Nairobi, Kenya.
   [Kiptai, T.] Amref Hlth Africa, Nairobi, Kenya.
   [Matu, S. W.] Kenya Govt Med Res Ctr, Nairobi, Kenya.
   [Chaba, L.] Strathmore Univ, Nairobi, Kenya.
   [Karanja, M.] Natl AIDS & STI Control Program, Nairobi, Kenya.
   [Otwabe, J. S.] Kisii Teaching & Referral Hosp, Nairobi, Kenya.
RP Kingwara, L (通讯作者)，Natl Publ Hlth Labs, Nairobi, Kenya.
EM leonard.Kingwara@gmail.com
RI Onyango, Patrick/AGG-7442-2022; Chaba, Linda/AAJ-1771-2020
OI Chaba, Linda/0000-0002-4548-2563
CR Al-Darraji HAA, 2013, PLOS ONE, V8, DOI 10.1371/journal.pone.0073717
   Albert H, 2010, BMC INFECT DIS, V10, DOI 10.1186/1471-2334-10-41
   Aljohani S, 2013, ANTIMICROB RESIST IN, V2, P285, DOI [10.1186/2047-2994-2-s1-p285, DOI 10.1186/2047-2994-2-S1-P285]
   [Anonymous], 2012, AM J TROP MED HYG, P9
   Davis JL, 2011, AM J RESP CRIT CARE, pA5314, DOI 10.1164/ajrccm-conference.2011.183.1_meetingabstracts.a5314
   Drobniewski F, 2015, HEALTH TECHNOL ASSES, V19, P1, DOI 10.3310/hta19340
   Enos M, 2018, PLOS ONE, V13, DOI 10.1371/journal.pone.0209098
   Evans CA, 2011, PLOS MED, V8, DOI 10.1371/journal.pmed.1001064
   Faburay A, 2017, AM J RESP CRIT CARE, V195
   Gersh J, 2018, AM J RESP CRIT CARE, V197
   Getahun Haileyesus, 2012, Morbidity and Mortality Weekly Report, V61, P484
   Helb D, 2010, J CLIN MICROBIOL, V48, P229, DOI 10.1128/JCM.01463-09
   Jain A, 2016, INT J TUBERC LUNG D, V20, P870, DOI 10.5588/ijtld.15.0874
   Kwamanga D, 2010, INT J TUBERC LUNG D, V14, P695
   Lin HC, 2017, EUR J CLIN MICROBIOL, V36, P2431, DOI 10.1007/s10096-017-3082-9
   Liu ZW, 2017, TROP MED INT HEALTH, V22, P1328, DOI 10.1111/tmi.12934
   Luetkemeyer AF, 2014, J CLIN MICROBIOL, V52, P1052, DOI 10.1128/JCM.02639-13
   Malbruny B, 2011, INT J TUBERC LUNG D, V15, P553, DOI 10.5588/ijtld.10.0497
   Meaza A, 2017, BMC INFECT DIS, V17, DOI 10.1186/s12879-017-2389-6
   Minion J, 2010, INT J TUBERC LUNG D, V14, P941
   Mironova S, 2011, CLIN MICROBIOL INFEC, V17, pS588, DOI [10.1111/j.1469-0691.2010.03310.x, DOI 10.1111/J.1469-0691.2010.03310.X]
   Pandey P, 2017, PLOS ONE, V12, DOI 10.1371/journal.pone.0169798
   Pandey S, 2017, PATHOLOGY, V49, P70, DOI 10.1016/j.pathol.2016.10.004
   Pang Y, 2016, SCI REP-UK, V6, DOI 10.1038/srep25330
   Raizada N, 2014, PLOS ONE, V9, DOI [10.1371/journal.pone.0088626, 10.1371/journal.pone.0105346]
   Rufai SB, 2014, J CLIN MICROBIOL, V52, P1846, DOI 10.1128/JCM.03005-13
   Singh BK, 2017, PLOS ONE, V12, DOI 10.1371/journal.pone.0182988
   Singh UB, 2016, PLOS ONE, V11, DOI 10.1371/journal.pone.0149258
   Singhal R, 2012, INDIAN J MED RES, V136, P1044
   Theron G, 2016, COCHRANE DB SYST REV, DOI 10.1002/14651858.CD010705.pub3
   Tomasicchio M, 2016, SCI REP-UK, V6, DOI 10.1038/srep17850
   Wang HH, 2011, BRAZ J MICROBIOL, V42, P964, DOI [10.1590/S1517-83822011000300016, 10.1590/S1517-838220110003000016]
   WHO, 2014, GLOB TUB REP
   Woods G. L., 2005, Clinical Microbiology Newsletter, V27, P67, DOI 10.1016/S0196-4399(05)80022-4
   World Health Organization, 2016, GLOBAL TUBERCULOSIS
   World Health Organization, 2016, GLOB TUB REP 2016
   Yadav RN, 2013, PLOS ONE, V8, DOI 10.1371/journal.pone.0072036
NR 37
TC 4
Z9 4
U1 1
U2 1
PU BMC
PI LONDON
PA CAMPUS, 4 CRINAN ST, LONDON N1 9XW, ENGLAND
EI 1471-2334
J9 BMC INFECT DIS
JI BMC Infect. Dis.
PD OCT 15
PY 2019
VL 19
IS 1
AR 852
DI 10.1186/s12879-019-4470-9
PG 8
WC Infectious Diseases
WE Science Citation Index Expanded (SCI-EXPANDED)
SC Infectious Diseases
GA JE1GR
UT WOS:000490441700013
PM 31615537
OA Green Published, Green Submitted, gold
DA 2022-08-20
ER

PT J
AU Goussard, P
AF Goussard, P.
TI FACTORS THAT PREDICT FOR POSITIVE GENEXPERT MTB/RIF ON BRONCHOALVEOLAR
   LAVAGE SAMPLES IN CHILDREN WITH SUSPECTED TUBERCULOSIS
SO PEDIATRIC PULMONOLOGY
LA English
DT Meeting Abstract
C1 [Goussard, P.] Univ Stellenbosch, Pediat & Child Hlth, Cape Town, South Africa.
NR 0
TC 0
Z9 0
U1 0
U2 0
PU WILEY-BLACKWELL
PI HOBOKEN
PA 111 RIVER ST, HOBOKEN 07030-5774, NJ USA
SN 8755-6863
EI 1099-0496
J9 PEDIATR PULM
JI Pediatr. Pulmonol.
PD JUN
PY 2015
VL 50
SU 39
MA 121
BP S81
EP S81
PG 1
WC Pediatrics; Respiratory System
WE Science Citation Index Expanded (SCI-EXPANDED)
SC Pediatrics; Respiratory System
GA CQ7NR
UT WOS:000360791400144
DA 2022-08-20
ER

PT J
AU Velen, K
   Podewils, LJ
   Shah, NS
   Lewis, JJ
   Dinake, T
   Churchyard, GJ
   Reichler, M
   Charalambous, S
AF Velen, Kavindhran
   Podewils, Laura J.
   Shah, N. Sarita
   Lewis, James J.
   Dinake, Tiro
   Churchyard, Gavin J.
   Reichler, Mary
   Charalambous, Salome
TI Performance of GeneXpert MTB/RIF for Diagnosing Tuberculosis Among
   Symptomatic Household Contacts of Index Patients in South Africa
SO OPEN FORUM INFECTIOUS DISEASES
LA English
DT Article
DE GeneXpert MTB/RIF; household contacts; mycobacterial culture; TB disease
ID XPERT MTB/RIF; PULMONARY TUBERCULOSIS; CHILDREN; STRATEGIES; SPECIMENS;
   BURDEN; ASSAY; HIV
AB Background. We describe the performance of GeneXpert MTB/RIF (Xpert) for diagnosing tuberculosis (TB) among symptomatic household contacts (HHCs) of rifampicin-resistant and drug-sensitive index cases.
   Methods. We conducted a cross-sectional study among HHCs of recently diagnosed (<2 weeks) smear-positive and Xpert-positive index cases in the Bojanala District, South Africa. The HHCs were screened for TB symptoms; persons with >= 1 TB symptom provided 1 sputum for smear microscopy, Xpert, and mycobacterial growth indicator tube (MGIT) culture. Diagnostic test performance of Xpert was determined using MGIT as the reference standard.
   Results. From August 2013 to July 2015, 619 HHCs from 216 index cases were enrolled: 60.6% were female, median age was 22 years (interquartile range, 9-40), and 126 (20.4%) self-reported/tested human immunodeficiency virus positive. A total of 54.3% (336 of 619) of contacts had >= 1 TB symptom (cough, fever, night sweats, weight loss), 297 of 336 (88.4%) of which provided a sputum; 289 (97.3%) had complete testing and 271 were included in the analysis. In total, 42 (6.8%) of 619 HHCs had microbiologically confirmed TB. The MGIT identified 33 HHCs as positive for Mycobacterium tuberculosis; of these, 7 were positive on Xpert resulting in a sensitivity of 21.2% (95% confidence interval [CI], 9.0-38.9), specificity of 98.3% (95% CI, 95.6-99.5), positive predictive value of 63.6% (95% CI, 30.8-89.1), and negative predictive value of 90.0 (95% CI, 85.7-93.4).
   Conclusions. Among symptomatic HHCs investigated for TB, Xpert performed suboptimally compared with MGIT culture. The poor performance of Xpert for diagnosing TB suggests that a more sensitive test, such a Xpert Ultra or culture, may be needed to improve yield of contact investigation, where feasible.
C1 [Velen, Kavindhran; Dinake, Tiro; Churchyard, Gavin J.; Charalambous, Salome] Aurum Inst, Johannesburg, South Africa.
   [Podewils, Laura J.] Denver Publ Hlth, Denver, CO USA.
   [Shah, N. Sarita] Emory Univ, Rollins Sch Publ Hlth, Atlanta, GA 30322 USA.
   [Lewis, James J.] London Sch Hyg & Trop Med, MRC Trop Epidemiol Grp, London, England.
   [Lewis, James J.] Cardiff Univ, Sch Social Sci, Publ Serv Innovat Lab Wales, Y Lab, Cardiff, Wales.
   [Churchyard, Gavin J.; Charalambous, Salome] Univ Witwatersrand, Sch Publ Hlth, Johannesburg, South Africa.
RP Velen, K (通讯作者)，Aurum Inst, 29 Queens Rd, ZA-2193 Parktown, South Africa.
EM kvelen@auruminstitute.org
OI Velen, Kavindhran/0000-0001-8577-3915
FU US Centers for Disease Control and Prevention [TBNX-14-61028-1]; UK
   Medical Research Council (MRC) [MR/K012126/1]; UK Department for
   International Development (DFID) [MR/K012126/1]; European Union
FX This work was funded by the US Centers for Disease Control and
   Prevention (Grant TBNX-14-61028-1; in part to K. V. and S. C.). J. J. L.
   was funded in part by a grant jointly funded by the UK Medical Research
   Council (MRC) and the UK Department for International Development (DFID)
   (MR/K012126/1) under the MRC/DFID Concordat agreement and is also part
   of the EDCTP2 programme supported by the European Union.
CR Annabel B., 2019, GLOBAL TUBERCULOSIS
   Ayles H, 2013, LANCET, V382, P1183, DOI 10.1016/S0140-6736(13)61131-9
   Boehme CC, 2010, NEW ENGL J MED, V363, P1005, DOI 10.1056/NEJMoa0907847
   Corbett EL, 2010, LANCET, V376, P1244, DOI 10.1016/S0140-6736(10)61425-0
   Detjen AK, 2015, LANCET RESP MED, V3, P451, DOI 10.1016/S2213-2600(15)00095-8
   Dorman SE, 2018, LANCET INFECT DIS, V18, P76, DOI [10.1016/S1473-3099(17)30691-6, 10.1016/s1473-3099(17)30691-6]
   Dorman SE, 2012, PLOS ONE, V7, DOI 10.1371/journal.pone.0043307
   Fox GJ, 2018, NEW ENGL J MED, V378, P221, DOI 10.1056/NEJMoa1700209
   Fox GJ, 2013, EUR RESPIR J, V41, P140, DOI 10.1183/09031936.00070812
   Gupta A, 2020, CLIN INFECT DIS, V70, P425, DOI 10.1093/cid/ciz235
   Hanrahan CF, 2014, AM J RESP CRIT CARE, V189, P1426, DOI 10.1164/rccm.201312-2140OC
   Health Do, 2014, NAT TUB MAN GUID 201
   Hinderaker SG, 2011, INT J TUBERC LUNG D, V15, P71
   Jackson-Sillah D, 2007, T ROY SOC TROP MED H, V101, P594, DOI 10.1016/j.trstmh.2007.02.001
   Lebina L, 2016, TUBERC RES TREAT, V2016
   Luetkemeyer AF, 2016, CLIN INFECT DIS, V62, P1081, DOI 10.1093/cid/ciw035
   Ntinginya EN, 2012, INT J TUBERC LUNG D, V16, P1468, DOI 10.5588/ijtld.12.0127
   Pinyopornpanish K, 2015, TUBER RES TREAT, V2015
   Rachow A, 2011, PLOS ONE, V6, DOI 10.1371/journal.pone.0020458
   Reichler MR, 2020, CLIN INFECT DIS, V70, P1562, DOI 10.1093/cid/ciz438
   Reid MJA, 2009, LANCET INFECT DIS, V9, P173, DOI 10.1016/S1473-3099(09)70043-X
   Shah NS, 2014, CLIN INFECT DIS, V58, P381, DOI 10.1093/cid/cit643
   Shapiro AE, 2012, AM J RESP CRIT CARE, V185, P1110, DOI 10.1164/rccm.201111-1941OC
   Steingart KR, 2014, COCHRANE DB SYST REV, DOI [10.1002/14651858.CD009593.pub3, 10.1002/14651858.CD009593.pub2]
   Theron G, 2018, J CLIN MICROBIOL, V56, DOI [10.1128/JCM.01696-17, 10.1128/jcm.01696-17]
   Theron G, 2014, SCI REP-UK, V4, DOI 10.1038/srep05658
   Thind D, 2012, INT J TUBERC LUNG D, V16, P1643, DOI 10.5588/ijtld.12.0074
   Togun TO, 2015, INT J TUBERC LUNG D, V19, P1091, DOI 10.5588/ijtld.15.0228
   Vanleeuw L., 2016, DISTRICT HLTH BAROME
   World Health Organization, 2012, REC INV CONT PERS IN
   World Health Organization, 2013, SYST SCREEN ACT TUB
   World Health Organization, 2013, AUT REALT NUCL AC AM
   Zachariah R, 2003, INT J TUBERC LUNG D, V7, P1033
   Zar HJ, 2013, LANCET GLOB HEALTH, V1, pE97, DOI 10.1016/S2214-109X(13)70036-6
NR 34
TC 0
Z9 0
U1 0
U2 1
PU OXFORD UNIV PRESS INC
PI CARY
PA JOURNALS DEPT, 2001 EVANS RD, CARY, NC 27513 USA
SN 2328-8957
J9 OPEN FORUM INFECT DI
JI Open Forum Infect. Dis.
PD APR
PY 2021
VL 8
IS 4
AR ofab025
DI 10.1093/ofid/ofab025
EA JAN 2021
PG 7
WC Immunology; Infectious Diseases; Microbiology
WE Science Citation Index Expanded (SCI-EXPANDED)
SC Immunology; Infectious Diseases; Microbiology
GA SI2WK
UT WOS:000654686900004
PM 33884274
OA Green Accepted, Green Published, gold
DA 2022-08-20
ER

PT J
AU Rasheed, F
   Saeed, M
AF Rasheed, F.
   Saeed, M.
TI GeneXpert (R) assay; and its performance for the diagnosis of
   HIV-associated tuberculosis: Is scale-up worth it?
SO INTERNATIONAL JOURNAL OF INFECTIOUS DISEASES
LA English
DT Meeting Abstract
C1 [Rasheed, F.] Allama Iqbal Med Coll, Dept Microbiol, Lahore, Pakistan.
   [Saeed, M.] Univ Punjab, Dept Microbiol & Mol Genet, Lahore, Pakistan.
RI saeed, Mian Muhammad/R-5582-2019
OI saeed, Mian Muhammad/0000-0001-8602-0827
NR 0
TC 0
Z9 0
U1 0
U2 0
PU ELSEVIER SCI LTD
PI OXFORD
PA THE BOULEVARD, LANGFORD LANE, KIDLINGTON, OXFORD OX5 1GB, OXON, ENGLAND
SN 1201-9712
EI 1878-3511
J9 INT J INFECT DIS
JI Int. J. Infect. Dis.
PD DEC
PY 2020
VL 101
SU 1
MA 0687
BP 287
EP 287
DI 10.1016/j.ijid.2020.09.750
PG 1
WC Infectious Diseases
WE Science Citation Index Expanded (SCI-EXPANDED)
SC Infectious Diseases
GA PY6EB
UT WOS:000612135100637
OA gold
DA 2022-08-20
ER

PT J
AU Das, M
   Pasupuleti, D
   Rao, S
   Sloan, S
   Mansoor, H
   Kalon, S
   Hossain, FN
   Ferlazzo, G
   Isaakidis, P
AF Das, Mrinalini
   Pasupuleti, Dileep
   Rao, Srinivasa
   Sloan, Stacy
   Mansoor, Homa
   Kalon, Stobdan
   Hossain, Farah Naz
   Ferlazzo, Gabriella
   Isaakidis, Petros
TI GeneXpert and Community Health Workers Supported Patient Tracing for
   Tuberculosis Diagnosis in Conflict-Affected Border Areas in India
SO TROPICAL MEDICINE AND INFECTIOUS DISEASE
LA English
DT Article
DE sputum; health promotion; operational research; indigenous population
ID PULMONARY TUBERCULOSIS
AB Medecins Sans Frontieres (MSF) has been providing diagnosis and treatment for patients with tuberculosis (TB) via mobile clinics in conflict-affected border areas of Chhattisgarh, India since 2009. The study objectives were to determine the proportion of patients diagnosed with TB and those who were lost-to-follow-up (LTFU) prior to treatment initiation among patients with presumptive TB between April 2015 and August 2018. The study also compared bacteriological confirmation and pretreatment LTFU during two time periods: a) April 2015-August 2016 and b) April 2017-August 2018 (before and after the introduction of GeneXpert as a first diagnostic test). Community health workers (CHW) supported patient tracing. This study was a retrospective analysis of routine program data. Among 1042 patients with presumptive TB, 376 (36%) were diagnosed with TB. Of presumptive TB patients, the pretreatment LTFU was 7%. Upon comparing the two time-periods, bacteriological confirmation increased from 20% to 33%, while pretreatment LTFU decreased from 11% to 4%. TB diagnosis with GeneXpert as the first diagnostic test and CHW-supported patient tracing in a mobile-clinic model of care shows feasibility for replication in similar conflict-affected, hard to reach areas.
C1 [Das, Mrinalini; Mansoor, Homa; Kalon, Stobdan; Hossain, Farah Naz] Doctors Borders, Med Sans Frontieres, Delhi 110024, India.
   [Pasupuleti, Dileep; Sloan, Stacy] Doctors Borders, Med Sans Frontieres, Bhadrachalam 507111, Telangana, India.
   [Rao, Srinivasa] Bhadrachalam Dist Hosp, Dist TB Off, RNTCP, Bhadrachalam 507111, Telangana, India.
   [Ferlazzo, Gabriella; Isaakidis, Petros] Med Sans Frontieres, Southern Africa Med Unit, ZA-7925 Cape Town, South Africa.
RP Das, M (通讯作者)，Doctors Borders, Med Sans Frontieres, Delhi 110024, India.
EM msfocb-delhi-epi@brussels.msf.org; 1drdileep1@gmail.com;
   golla.srinivasulu99@gmail.com; MSFOCB-Bhadrachalam-PMR@brussels.msf.org;
   msfocb-delhi-med@brussels.msf.org;
   Msfocb-India-ops-strategic-advisor@brussels.msf.org;
   msfocb-delhi-medco@brussels.msf.org; Gabriella.FERLAZZO@joburg.msf.org;
   Petros.Isaakidis@joburg.msf.org
OI Das, Mrinalini/0000-0002-1354-4299; Isaakidis,
   Petros/0000-0002-7881-1554
CR Ade S, 2014, PLOS ONE, V9, DOI 10.1371/journal.pone.0095603
   [Anonymous], 2013, RAIPUR NEWS TIM 0325
   Armstrong E., 2014, CONFL HEALTH, V8, P1, DOI [10.1186/1752-1505-8-2525904975, DOI 10.1186/1752-1505-8-2525904975]
   Central TB Division, 2017, NAT STRAT PLAN TUB E
   Central TB Division India, 2018, TB ANN REP 2018
   Corninx R., 2011, TUBERCULOSIS COMPLEX
   Correa G, 2017, CONFL HEALTH, V11, DOI 10.1186/s13031-017-0113-1
   Das M, 2014, PLOS ONE, V9, DOI 10.1371/journal.pone.0092131
   Garg S., 2016, BMJ GLOB HLTH S1, V1, pA2
   Gele Abdi A, 2010, Confl Health, V4, P1, DOI 10.1186/1752-1505-4-1
   Guha R., 2007, ECON POLIT WEEKLY, P3305
   Hassanain SA, 2018, CONFL HEALTH, V12, DOI 10.1186/s13031-018-0154-0
   Ismail MB, 2018, PLOS PATHOG, V14, DOI 10.1371/journal.ppat.1007014
   Jain SK, 2013, BIOMED RES INT, V2013, DOI 10.1155/2013/783698
   Kundu Debashish, 2015, WHO South East Asia J Public Health, V4, P69, DOI 10.4103/2224-3151.206624
   Marais BJ, 2011, INDIAN J PEDIATR, V78, P321, DOI 10.1007/s12098-010-0353-1
   Munn-Mace G, 2018, HEALTH POLICY PLANN, V33, P247, DOI 10.1093/heapol/czx157
   Pawar S., 2017, MED J DY PATIL U, V10, P46, DOI [10.4103/0975-2870.197916, DOI 10.4103/0975-2870.197916]
   Purohit MR, 2019, TUBER RES TREAT, V2019, P1
   Purty AJ, 2019, INDIAN J COMMUN MED, V44, P17, DOI 10.4103/ijcm.IJCM_120_18
   Raizada N, 2018, PLOS ONE, V13, DOI 10.1371/journal.pone.0193194
   Raizada N, 2014, PLOS ONE, V9, DOI 10.1371/journal.pone.0089301
   Rao VG, 2019, BMC INFECT DIS, V19, DOI 10.1186/s12879-019-3815-8
   Rao VG, 2010, INT J TUBERC LUNG D, V14, P368
   Sharma B.V., 2002, COMMUNITY CONTRIBUTI, P63
   Sharma SK, 2017, INDIAN J MED RES, V145, P448, DOI 10.4103/ijmr.IJMR_1950_16
   Shewade HD, 2018, GLOBAL HEALTH ACTION, V11, DOI 10.1080/16549716.2018.1494897
   Singh UB, 2016, PLOS ONE, V11, DOI 10.1371/journal.pone.0149258
   Subbaraman R, 2016, PLOS MED, V13, DOI 10.1371/journal.pmed.1002149
   Thomas BE, 2018, BMC INFECT DIS, V18, DOI 10.1186/s12879-018-3039-3
   Thomas BE, 2015, INDIAN J MED RES, V141, P614
   WHO, 2014, AFR UN UN HLTH COV A, P1
NR 32
TC 4
Z9 4
U1 1
U2 2
PU MDPI
PI BASEL
PA ST ALBAN-ANLAGE 66, CH-4052 BASEL, SWITZERLAND
EI 2414-6366
J9 TROP MED INFECT DIS
JI Trop. Med. Infect. Dis.
PD MAR
PY 2020
VL 5
IS 1
DI 10.3390/tropicalmed5010001
PG 8
WC Infectious Diseases; Parasitology; Tropical Medicine
WE Science Citation Index Expanded (SCI-EXPANDED)
SC Infectious Diseases; Parasitology; Tropical Medicine
GA ML5KI
UT WOS:000549504500001
PM 31877818
OA gold, Green Published
DA 2022-08-20
ER

PT J
AU Berra, TZ
   Bruce, ATI
   Alves, YM
   Ramos, ACV
   Giacomet, CL
   Arcencio, RA
AF Berra, Thais Zamboni
   Inomata Bruce, Alexandre Tadashi
   Alves, Yan Mathias
   Vieira Ramos, Antonio Carlos
   Giacomet, Clovis Luciano
   Arcencio, Ricardo Alexandre
TI Impact of the GeneXpert (R) MTB/RIF rapid molecular test on tuberculosis
   detection: temporal trends and vulnerable territories
SO REVISTA LATINO-AMERICANA DE ENFERMAGEM
LA English
DT Article
DE Tuberculosis; Mycobacterium tuberculosis; Diagnosis; Incidence; Time
   Series Studies; Spatial Analysis
ID RIO-DE-JANEIRO; PULMONARY TUBERCULOSIS; HEALTH; BRAZIL; TIME; DIAGNOSIS;
   STIGMA; XPERT
AB Objective: to assess the impact of the GeneXpert (R) MTB/RIF rapid molecular test on tuberculosis detection, to analyze the temporal trend of the event and to identify vulnerable territories in a Brazilian municipality. Method: an ecological study carried out in Ribeirao Preto, Sao Paulo, Brazil, a municipality considered a priority in tuberculosis control due to the high number of cases. To classify the temporal trend, the Prais-Winsten method and the Interrupted Time Series were used to identify changes in the disease incidence. Kernel intensity analysis was applied to identify vulnerable areas. Results: the temporal trend of tuberculosis decreased by 18.1%/year and by 6.9%/year for children under 15 years old. The North District decreased by 6.67%/ year and the East District increased by 17.5%/year in the incidence of tuberculosis. Resistant tuberculosis, after the implementation of the Rapid Molecular Test, increased by 0.6% per year. The South and West Districts showed a higher density of cases, with a range from 45 to 79 tuberculosis cases per square kilometer (km(2)). Conclusion: although resistant tuberculosis is not a problem in the scenario, the study showed an increase in its incidence, which puts it on alert. The use of spatial analysis enabled the identification of priority areas, putting them in evidence for health surveillance actions.
C1 [Berra, Thais Zamboni; Inomata Bruce, Alexandre Tadashi; Alves, Yan Mathias; Vieira Ramos, Antonio Carlos; Giacomet, Clovis Luciano; Arcencio, Ricardo Alexandre] Univ Sao Paulo, PAHO WHO Collaborating Ctr Nursing Res Dev, Escola Enfermagem Ribeirao Preto, Ribeirao Preto, SP, Brazil.
   [Berra, Thais Zamboni] Fundacao Amparo Pesquisa Estado Sao Paulo FAPESP, Sao Paulo, Brazil.
   [Inomata Bruce, Alexandre Tadashi] Conselho Nacl Desenvolvimento Cient & Tecnol CNPq, Brasilia, DF, Brazil.
   [Alves, Yan Mathias; Vieira Ramos, Antonio Carlos] Coordenacao Aperfeigoamento Pessoal Nivel Super C, Brasilia, DF, Brazil.
RP Berra, TZ (通讯作者)，Univ Sao Paulo, PAHO WHO Collaborating Ctr Nursing Res Dev, Escola Enfermagem Ribeirao Preto, Ribeirao Preto, SP, Brazil.; Berra, TZ (通讯作者)，Fundacao Amparo Pesquisa Estado Sao Paulo FAPESP, Sao Paulo, Brazil.
EM thaiszamboni@live.com
RI Inomata Bruce, Alexandre Tadashi/GPK-2777-2022; Inomata Bruce, Alexandre
   Tadashi/ABA-8987-2021; Alves, Yan Mathias/GLU-0281-2022; Arcencio,
   Ricardo Alexandre/B-9520-2012
OI Inomata Bruce, Alexandre Tadashi/0000-0002-7008-8023; Alves, Yan
   Mathias/0000-0002-5596-0047; Arcencio, Ricardo
   Alexandre/0000-0003-4792-8714; Berra, Thais Zamboni/0000-0002-4163-8719
FU Fundacao de Amparo a Pesquisa do Estado de Sao Paulo (FAPESP)
   [2018/03700-7]
FX Supported by Fundacao de Amparo a Pesquisa do Estado de Sao Paulo
   (FAPESP), Grant #2018/03700-7, Brazil.
CR Al Qurainees Ghaya Ibrahim, 2016, Int J Pediatr Adolesc Med, V3, P28, DOI 10.1016/j.ijpam.2015.11.003
   Annabel B., 2019, GLOBAL TUBERCULOSIS
   Bernal JL, 2017, INT J EPIDEMIOL, V46, P348, DOI 10.1093/ije/dyw098
   Brasil. Ministerio da Saude. Secretaria de Vigilancia em Saude, 2019, B EPIDEMIOLOGICO BRA
   Brasil. Ministerio da Saude. Secretaria de Vigilancia em Saude, 2020, B EPIDEMIOLOGICO TUB
   Brasil. Ministerio da Saude. Secretaria de Vigilancia em Saude. Departamento de Vigilancia das Doencas Transmissiveis, 2015, REDE TESTE R PIDO TU
   Cano Ana Paula Ghussn, 2017, Rev. paul. pediatr., V35, P165, DOI 10.1590/1984-0462/;2017;35;2;00004
   Carvalho-Filho AX, 2019, ATENAS HIGEIA, V1, P24
   Craig GM, 2017, INT J INFECT DIS, V56, P90, DOI 10.1016/j.ijid.2016.10.011
   Dandrea L.A.Z., 2018, HYGEIA REV BRASILEIR, V14, P121, DOI [10.14393/Hygeia142810, DOI 10.14393/HYGEIA142810]
   de Lima TM., 2017, REV PAN-AMAZ SAUDE, V8, P65, DOI [10.5123/s2176-62232017000200008, DOI 10.5123/S2176-62232017000200008]
   Detjen AK, 2015, LANCET RESP MED, V3, P451, DOI 10.1016/S2213-2600(15)00095-8
   Duarte R, 2018, J BRAS PNEUMOL, V44, P73, DOI [10.1590/s1806-37562017000000449, 10.1590/S1806-37562017000000449]
   Antunes JLF, 2015, EPIDEMIOL SERV SAUDE, V24, P565, DOI 10.5123/S1679-49742015000300024
   Ferreira JT, 2017, SAUDE SOC-SAO PAULO, V26, P1015, DOI [10.1590/s0104-12902017155759, 10.1590/S0104-12902017155759]
   Ferreira NFR, 2019, PESQUI FOCO, V24, P41
   Holmberg PJ, 2019, PEDIATR REV, V40, P168, DOI 10.1542/pir.2018-0093
   Instituto Brasileiro de Geografia e Estatistica (IBGE), 2020, INFORMACOES MUNICIPI
   Leal BN, 2019, REV BRAS ENFERM, V72, P1262
   MORGENSTERN H, 1995, ANNU REV PUBL HEALTH, V16, P61, DOI 10.1146/annurev.pu.16.050195.000425
   Oliveira U. C., 2017, ESPA ABER, V7, P87
   Pandey P, 2017, PLOS ONE, V12, DOI 10.1371/journal.pone.0169798
   Rodrigues NCP, 2017, CIENC SAUDE COLETIVA, V22, P4125, DOI 10.1590/1413-812320172212.0143016
   Prado JC, 2016, CIENC SAUDE COLETIVA, V21, P1491, DOI 10.1590/1413-81232015215.03912016
   Prefeitura Municipal de Ribeirao Preto. Secretaria Municipal de Saude, 2020, TUBERCULOSE NO MUNIC
   Queiroz Ana Angélica Rêgo de, 2018, Rev. Latino-Am. Enfermagem, V26, pe2992, DOI 10.1590/1518-8345.2049.2992
   Rodrigues MAF, 2020, REV BAIANA SAUDE PUB, V40, P70
   Shah W, 2016, EUR RESPIR J, V48, DOI 10.1183/13993003.congress-2016.PA2779
   Silva Luiz Anildo Anacleto da, 2016, Trab. educ. saúde, V14, P765, DOI 10.1590/1981-7746-sol00015
   Pinto MFT, 2017, CAD SAUDE PUBLICA, V33, DOI [10.1590/0102-311X00214515, 10.1590/0102-311x00214515]
   Trajman A, 2014, EUR RESPIR J, V44, P1711, DOI 10.1183/09031936.00115514
   Yamamura M, 2016, REV SAUDE PUBL, V50, DOI [10.1590/S1518-8787.2016050006049, 10.1590/s1518-8787.2016050006049]
   Yang S, 2019, INT J ENV RES PUB HE, V16, DOI 10.3390/ijerph16224395
   Ponce MAZ, 2016, EPIDEMIOL SERV SAUDE, V25, P553, DOI [10.5123/s1679-49742016000300011, 10.5123/S1679-49742016000300011]
   Zhang X, 2019, J DIABETES INVEST, V10, P272, DOI 10.1111/jdi.12899
NR 35
TC 1
Z9 1
U1 0
U2 0
PU UNIV SAO PAULO, ESCOLA DE ENFERMAGEM DE RIBEIRAO PRETO
PI RIBEIRAO PRETO
PA AV BANDEIRANTES, 3900, RIBEIRAO PRETO, SP 14040-902  A, BRAZIL
SN 1518-8345
J9 REV LAT-AM ENFERM
JI Rev. Latino-Am. Enfermagem
PY 2021
VL 29
AR e3441
DI 10.1590/1518.8345.4412.3441
PG 11
WC Nursing
WE Science Citation Index Expanded (SCI-EXPANDED); Social Science Citation Index (SSCI)
SC Nursing
GA TP3NH
UT WOS:000677500000002
PM 34287540
OA gold, Green Published
DA 2022-08-20
ER

PT J
AU Deng, Y
   Duan, YF
   Gao, SP
   Wang, JM
AF Deng, Yan
   Duan, Yi-fei
   Gao, Shu-pei
   Wang, Jian-miao
TI Comparison of LAMP, GeneXpert, Mycobacterial Culture, Smear Microscopy,
   TSPOT.TB, TBAg/PHA Ratio for Diagnosis of Pulmonary Tuberculosis
SO CURRENT MEDICAL SCIENCE
LA English
DT Article
DE pulmonary tuberculosis; bronchoalveolar lavage fluid; loop-mediated
   isothermal amplification; GeneXpert; TSPOT
ID XPERT(R) MTB/RIF; FEASIBILITY; ACCURACY; SPUTUM; ASSAY
AB Objective To investigate the application value of loop-mediated isothermal amplification (LAMP), GeneXpert, mycobacterial culture, smear microscopy, TSPOT.TB (TSPOT), ratio of TB-specific antigen to phytohemagglutinin (TBAg/PHA ratio) in the detection of mycobacterium tuberculosis in the bronchoalveolar lavage fluid. Methods A retrospective analysis was performed on the patients who underwent bronchoscopy from December 2018 to November 2019 in Tongji Hospital. The patients with positive tuberculosis culture or positive GeneXpert in bronchoalveolar lavage fluid were selected as the case group, and those without tuberculosis served as the control group. The receiver operating characteristic (ROC) curve was used to evaluate the diagnostic value of LAMP, GeneXpert, culture, smear microscopy, TSPOT, and TBAg/PHA ratio. Results For the patients with positive cultures as case, the sensitivity of LAMP, GeneXpert, smear microscopy, TSPOT and TBAg/PHA ratio was 73.49%, 89.16%, 25.30%, 80.00%, 33.85%, respectively, the specificity was 99.00%, 100.00%, 99.00%, 86.00%, 100.00%, respectively, the area under the ROC curve (AUC) was 0.849, 0.938, 0.633, 0.830, 0.669, respectively. For the patients with positive GeneXpert as case, the sensitivity of LAMP, mycobacterial culture, smear microscopy, TSPOT and TBAg/PHA ratio was 73.20%, 74.23%, 22.68%, 68.92%, 29.73%, respectively, the specificity was 99.00%, 100.00%, 99.00%, 86.00%, 100.00%, respectively, the AUC was 0.853, 0.878, 0.623, 0.775, 0.649, respectively. Conclusion The sensitivity of GeneXpert was best. The sensitivity and diagnostic value of LAMP were slightly lower than those of GeneXpert, and were similar to tuberculosis culture. The sensitivity of smear microscopy was low. The specificity of TSPOT was low. When TBAg/PHA ratio >0.2 was used as a diagnostic index, the specificity was improved, but the sensitivity was low.
C1 [Deng, Yan; Duan, Yi-fei; Gao, Shu-pei; Wang, Jian-miao] Huazhong Univ Sci & Technol, Tongji Med Coll, Tongji Hosp, Dept Resp & Crit Care Med, Wuhan 430030, Peoples R China.
   [Wang, Jian-miao] Huazhong Univ Sci & Technol, Tongji Med Coll, Tongji Hosp, Dept Infect Control, Wuhan 430030, Peoples R China.
RP Wang, JM (通讯作者)，Huazhong Univ Sci & Technol, Tongji Med Coll, Tongji Hosp, Dept Resp & Crit Care Med, Wuhan 430030, Peoples R China.; Wang, JM (通讯作者)，Huazhong Univ Sci & Technol, Tongji Med Coll, Tongji Hosp, Dept Infect Control, Wuhan 430030, Peoples R China.
EM dy102398@163.com; wangjianmiao2010@126.com
CR Bodal VK, 2015, INDIAN J PATHOL MICR, V58, P443, DOI 10.4103/0377-4929.168849
   Boehme CC, 2007, J CLIN MICROBIOL, V45, P1936, DOI 10.1128/JCM.02352-06
   Boehme CC, 2011, LANCET, V377, P1495, DOI 10.1016/S0140-6736(11)60438-8
   Boehme CC, 2010, NEW ENGL J MED, V363, P1005, DOI 10.1056/NEJMoa0907847
   Bojang AL, 2016, J INFECTION, V72, P332, DOI 10.1016/j.jinf.2015.11.011
   Chen, 2019, INT J LAB MED, V40, P783
   Lawn SD, 2011, FUTURE MICROBIOL, V6, P1067, DOI [10.2217/fmb.11.84, 10.2217/FMB.11.84]
   Lee HY, 2013, INT J TUBERC LUNG D, V17, P917, DOI 10.5588/ijtld.12.0885
   Liu X, 2018, INFECT DIS POVERTY, V7, DOI 10.1186/s40249-018-0403-x
   National Health and Family Planning Commission of the People's Republic of China, 2017, DIAGN PULM TUB, P288
   Neonakis IK, 2011, EUR J CLIN MICROBIOL, V30, P937, DOI 10.1007/s10096-011-1195-0
   Notomi T, 2000, NUCLEIC ACIDS RES, V28, DOI 10.1093/nar/28.12.e63
   Ou XC, 2014, PLOS ONE, V9, DOI 10.1371/journal.pone.0094544
   Pan XF, 2018, FRONT MICROBIOL, V9, DOI 10.3389/fmicb.2018.00444
   Pang Y, 2016, EUR RESPIR J, V47, P1584, DOI 10.1183/13993003.01854-2015
   Steingart K, 2006, LANCET INFECT DIS, V6, P570, DOI 10.1016/S1473-3099(06)70578-3
   Rudeeaneksin J, 2012, JPN J INFECT DIS, V65, P306, DOI 10.7883/yoken.65.306
   Shao, 2015, INT J CLIN EXP MED, V8, p15 458
   Shete PB, 2019, BMC INFECT DIS, V19, DOI 10.1186/s12879-019-3881-y
   Steingart KR, 2014, COCHRANE DB SYST REV, DOI [10.1002/14651858.CD009593.pub3, 10.1002/14651858.CD009593.pub2]
   Wang F, 2016, INT J TUBERC LUNG D, V20, P487, DOI 10.5588/ijtld.15.0756
   Wang T, 2019, Zhonghua Jie He He Hu Xi Za Zhi, V42, P262, DOI 10.3760/cma.j.issn.1001-0939.2019.04.003
   WHO, 2018, AD NUTR BANGL
   World Health Organization, 2013, AUTOMATED REAL TIME
   World Naturopathic Federation, 2019, GLOB NAT REG NOV 201
   Xu P, 2019, J INFECTION, V79, P24, DOI 10.1016/j.jinf.2019.05.009
   Zhang, 2016, J MICROBES INFECT, V11, P188
NR 27
TC 3
Z9 3
U1 4
U2 4
PU SPRINGER
PI NEW YORK
PA ONE NEW YORK PLAZA, SUITE 4600, NEW YORK, NY, UNITED STATES
SN 2096-5230
EI 2523-899X
J9 CURR MED SCI
JI Curr. Med. Sci.
PD OCT
PY 2021
VL 41
IS 5
BP 1023
EP 1028
DI 10.1007/s11596-021-2404-4
EA SEP 2021
PG 6
WC Medicine, Research & Experimental
WE Science Citation Index Expanded (SCI-EXPANDED)
SC Research & Experimental Medicine
GA WL5HH
UT WOS:000692056800001
PM 34476662
OA Green Published, Bronze
DA 2022-08-20
ER

PT J
AU Elbrolosy, AM
   El Helbawy, RH
   Mansour, OM
   Latif, RA
AF Elbrolosy, Asmaa Mohammed
   El Helbawy, Rana H.
   Mansour, Osama M.
   Latif, Reda Abdel
TI Diagnostic utility of GeneXpert MTB/RIF assay versus conventional
   methods for diagnosis of pulmonary and extra-pulmonary tuberculosis
SO BMC MICROBIOLOGY
LA English
DT Article
DE Mycobacterium tuberculosis; GeneXpert MTB; RIF assay; Rifampicin
ID MULTIDRUG-RESISTANT TUBERCULOSIS; XPERT MTB/RIF;
   MYCOBACTERIUM-TUBERCULOSIS; EXTRAPULMONARY TUBERCULOSIS; RISK-FACTORS;
   GENE XPERT; PREVALENCE; SPUTUM; PERFORMANCE; RIFAMPICIN
AB Background Tuberculosis (T.B) is one of the major infectious diseases in the developing countries. The diagnosis of extrapulmonary T.B (EPTB) remains problematic and emergence of resistant strains poses a significant threat. Improved diagnosis of tuberculosis is a global priority for proper control. The study aimed to assess the diagnostic accuracy of GeneXpert MTB/RIF assay for diagnosis of pulmonary TB (PTB) and EPTB and to evaluate the performance of GeneXpert system for demonstrating rifampicin resistance among the studied patients. Methods A total of 582 clinical samples (449 pulmonary; 430 sputum and 19 bronchoalveolar lavage (BAL) and 133 extra-pulmonary origins; 26 pleural fluid, 62 CSF, 19 ascetic fluid, 12 pus and 14 urine) were collected from patients under clinical and radiological assessment of either PTB or EPTB who were admitted to Menoufia Chest Hospital over a period of three years. Clinical samples were processed and investigated for detection of Mycobacterium tuberculosis (MTB) by both Xpert assay and the conventional methods including Ziehl-Neelsen (ZN)/acid-fast bacillus (AFB) smear microscopy and Lowenstein-Jensen (LJ) culture. Patients ' demographic, clinical characteristics and risk factors for acquiring rifampicin resistance were analyzed. Results The sensitivity, specificity, false- negative rate and total accuracy of AFB smear microscopy respectively were 72.1 %, 81.3 %, 27.9 and 78.8 % for PTB. However for EPTB, they were 63.2 %, 70.5 %, 36.8 and 68.4 % respectively in relation to LJ culture as the gold standard. GeneXpert MTB/RIF revealed better performance for PTB than EPTB. For PTB, it showed 90.2 % sensitivity, 86.9 % specificity, and 9.8 % false- negative rate. For EPTB, the assay showed a sensitivity of 81.6 %, specificity of 78.9 % and false- negative rate of 18.5 %. Multivariate regression analysis showed that presence of EPTB and contacts with known TB cases were independent risk factors for developing rifampicin resistance. Conclusions GeneXpert MTB/RIF assay is a rapid and highly sensitive technique for diagnosis of PTB or EPTB. Its simplicity and accuracy make this new method a very impressive tool for diagnosis of MTB and rifampicin resistance.
C1 [Elbrolosy, Asmaa Mohammed] Menoufia Univ, Med Microbiol & Immunol Dept, Fac Med, Shibin Al Kawm, Egypt.
   [El Helbawy, Rana H.] Menoufia Univ, Chest Dept, Fac Med, Shibin Al Kawm, Egypt.
   [Mansour, Osama M.] Chest Hosp, Minist Hlth & Populat, Shibin Al Kawm, Egypt.
   [Latif, Reda Abdel] Menoufia Univ, Fac Med, Publ Hlth Dept, Shibin Al Kawm, Egypt.
RP Elbrolosy, AM (通讯作者)，Menoufia Univ, Med Microbiol & Immunol Dept, Fac Med, Shibin Al Kawm, Egypt.
EM asmaaelbrolosy@yahoo.com
CR Acharya T., 2016, ZIEHL NEELSEN TECHNI
   Allahyartorkaman M, 2019, SCI REP-UK, V9, DOI 10.1038/s41598-019-55112-y
   Blakemore R, 2010, J CLIN MICROBIOL, V48, P2495, DOI 10.1128/JCM.00128-10
   BMJ best practice, EXTR TUB
   Boehme CC, 2010, NEW ENGL J MED, V363, P1005, DOI 10.1056/NEJMoa0907847
   Chang K, 2012, J INFECTION, V64, P580, DOI 10.1016/j.jinf.2012.02.012
   Denkinger CM, 2014, EUR RESPIR J, V44, P435, DOI 10.1183/09031936.00007814
   Desissa F, 2018, BMC PUBLIC HEALTH, V18, DOI 10.1186/s12889-018-5371-3
   Dunn JJ, 2016, J CLIN MICROBIOL, V54, P1434, DOI 10.1128/JCM.03043-15
   El-Helbawy RH, 2020, EGYPT J CHEST DIS TU, V69, P33, DOI 10.4103/ejcdt.ejcdt_84_19
   ElBouhy MS, 2020, EGYPT J CHEST DIS TU, V69, P12, DOI 10.4103/ejcdt.ejcdt_22_19
   Fouda ME, 2019, EGYPT J MED MICROBIO, V28, P141
   Gawish MK, 2019, EGYPT J MED MICROBIO, V28, P103
   Hefzy Enas M., 2021, Novel Research in Microbiology Journal, V5, P1146, DOI 10.21608/nrmj.2021.149391
   Hibah NA, 2015, EGYPT J BRONCHOL, V9, P96
   Khalil KF, 2015, JCPSP-J COLL PHYSICI, V25, P115, DOI 02.2015/JCPSP.115118
   Lee JY, 2015, TUBERC RESPIR DIS, V78, P47, DOI 10.4046/trd.2015.78.2.47
   Matabane MMZ, 2015, BMC INFECT DIS, V15, DOI 10.1186/s12879-015-1229-9
   Meawed TE, 2016, EGYPT J CHEST DIS TU, V65, P637, DOI 10.1016/j.ejcdt.2016.04.005
   Mechal Y, 2019, BMC INFECT DIS, V19, DOI 10.1186/s12879-019-4687-7
   Mekonnen F, 2015, BMC INFECT DIS, V15, DOI 10.1186/s12879-015-1202-7
   Metcalf T, 2018, PLOS ONE, V13, DOI 10.1371/journal.pone.0198695
   Mohammadien H, 2017, EGYPT J CHEST DIS TU, V66, P313, DOI 10.1016/j.ejcdt.2017.02.001
   Molicotti P, 2014, J INFECT DEVCTRIES
   Mulisa G, 2015, INT J INFECT DIS, V39, P57, DOI 10.1016/j.ijid.2015.08.013
   Nasiri MJ, 2014, ASIAN PAC J TROP MED, V7, P193, DOI 10.1016/S1995-7645(14)60019-5
   Nikolayevskyy VV, 2007, CLIN MICROBIOL INFEC, V13, P129, DOI 10.1111/j.1469-0691.2006.01583.x
   Opota O, 2016, CLIN MICROBIOL INFEC, V22, P613, DOI 10.1016/j.cmi.2016.04.010
   Organization W H, 2014, XPERT MTB RIF IMPL M
   Parsons LM, 2011, CLIN MICROBIOL REV, V24, P314, DOI 10.1128/CMR.00059-10
   Petroff SA, 1915, J EXP MED, V21, P38, DOI 10.1084/jem.21.1.38
   Piatek AS, 2013, GLOB HEALTH-SCI PRAC, V1, P18, DOI 10.9745/GHSP-D-12-00004
   Pk M., 2017, J TROPICAL DIS PUBLI, V2017, DOI [10.4172/2329-891X.1000246, DOI 10.4172/2329-891X.1000246]
   Sobh E, 2016, INT J MYCOBACT, V5, P333, DOI 10.1016/j.ijmyco.2016.08.001
   WHO, GLOBAL TUBERCULOSIS
   WHO, 2017, GLOB TUB REP
   World Health Organization, 2011, EARL DET TUB OV APPR
NR 37
TC 4
Z9 5
U1 2
U2 4
PU BMC
PI LONDON
PA CAMPUS, 4 CRINAN ST, LONDON N1 9XW, ENGLAND
SN 1471-2180
J9 BMC MICROBIOL
JI BMC Microbiol.
PD MAY 13
PY 2021
VL 21
IS 1
AR 144
DI 10.1186/s12866-021-02210-5
PG 10
WC Microbiology
WE Science Citation Index Expanded (SCI-EXPANDED)
SC Microbiology
GA SB0SN
UT WOS:000649713300001
PM 33980173
OA Green Published, gold
DA 2022-08-20
ER

PT J
AU Rasool, G
   Khan, AM
   Mohy-Ud-Din, R
   Riaz, M
AF Rasool, Ghulam
   Khan, Arif Muhammad
   Mohy-Ud-Din, Raza
   Riaz, Muhammad
TI Detection of Mycobacterium tuberculosis in AFB smear-negative sputum
   specimens through MTB culture and GeneXpert((R)) MTB/RIF assay
SO INTERNATIONAL JOURNAL OF IMMUNOPATHOLOGY AND PHARMACOLOGY
LA English
DT Article
DE AFB-negative smears; GeneXpert assay; MTB culture; pulmonary
   tuberculosis
AB Tuberculosis (TB) is an important public health issue around the globe which is a chronic infectious disease and is still one of the major challenges for developing countries. The emergence of drug-resistant TB makes the condition worse and there is an urgent need of fast, highly sensitive diagnostic methods. This study was undertaken to evaluate the performance of GeneXpert((R)) MTB/RIF assay and MTB culture for the detection of Mycobacterium tuberculosis (MTB) in sputum smear-negative pulmonary TB/drug-resistant tuberculosis (DR-TB) suspects. A total of 168 sputum smear-negative TB suspects were recruited for the study. Among the suspected TB cases, 52.98% were male and 47.02% were females with the mean age of 42 +/- 17.6 years. All the sputum specimens collected from the study population were subjected to Ziehl-Neelsen (ZN) smear microscopy, GeneXpert MTB/RIF assay, and MTB culture. The results revealed that, out of 168 acid-fast bacilli (AFB)/ZN smear microscopy-negative sputum specimens, 48 (28.57%) and 58 (34.52%) were detected MTB positive by GeneXpert MTB/RIF assay and MTB culture, respectively, while 120 (71.43%) and 110 (65.48%) suspected TB cases were confirmed negative by GeneXpert MTB/RIF assay and MTB culture, respectively. The study concluded that GeneXpert assay was found to be a rapid and accurate tool for MTB detection in smear-negative sputum specimens. GeneXpert has advantage over ZN smear microscopy and MTB culture as it detects MTB and rifampicin resistance simultaneously within 2 h with minimal biohazards.
C1 [Rasool, Ghulam; Riaz, Muhammad] Univ Sargodha, Dept Allied Hlth Sci, Sargodha Med Coll, Sargodha 40100, Pakistan.
   [Khan, Arif Muhammad] Univ Sargodha, Dept Biotechnol, Sargodha, Pakistan.
   [Mohy-Ud-Din, Raza] Univ Vet & Anim Sci, Inst Biochem & Biotechnol, Lahore, Pakistan.
RP Riaz, M (通讯作者)，Univ Sargodha, Dept Allied Hlth Sci, Sargodha Med Coll, Sargodha 40100, Pakistan.
EM riazmlt786@gmail.com
CR Abanda NN, 2017, BMC INFECT DIS, V17, DOI 10.1186/s12879-017-2489-3
   Akram Y, 2017, EUR J INFLAMM, V15, P42, DOI 10.1177/1721727X16688697
   Boehme CC, 2010, NEW ENGL J MED, V363, P1005, DOI 10.1056/NEJMoa0907847
   Caulfield Adam J, 2016, J Clin Tuberc Other Mycobact Dis, V4, P33, DOI 10.1016/j.jctube.2016.05.005
   Cheesbrough M, 2006, DISTRICT LAB PRACTIC
   Geleta DA, 2015, BMC MICROBIOL, V15, DOI 10.1186/s12866-015-0566-6
   Keflie TS, 2014, PAN AFR MED J, V19, DOI 10.11604/pamj.2014.19.162.3658
   Munir M., 2015, IOSR JDMS, V14, P56
   Rasool G, 2018, J BIOL REG HOMEOS AG, V32, P607
   Riaz M, 2016, INT J IMMUNOPATH PH, V29, P443, DOI 10.1177/0394632016638100
   Shrestha P, 2015, TUBERC RES TREAT, V2015
   *WHO, 2008, GLOB TUB CONTR SURV
   World Health Organization, 2021, GLOBAL TUBERCULOSIS
NR 13
TC 22
Z9 25
U1 1
U2 1
PU SAGE PUBLICATIONS INC
PI THOUSAND OAKS
PA 2455 TELLER RD, THOUSAND OAKS, CA 91320 USA
SN 0394-6320
EI 2058-7384
J9 INT J IMMUNOPATH PH
JI Int. J. Immunopathol. Pharmacol.
PD FEB 1
PY 2019
VL 33
AR 2058738419827174
DI 10.1177/2058738419827174
PG 6
WC Immunology; Pathology; Pharmacology & Pharmacy
WE Science Citation Index Expanded (SCI-EXPANDED)
SC Immunology; Pathology; Pharmacology & Pharmacy
GA HM6GZ
UT WOS:000459573500001
PM 30791749
OA Green Published, gold
DA 2022-08-20
ER

PT J
AU Zhou, YY
   Shi, JC
   Pan, N
   Wu, ZX
   Cheng, AQ
   Mei, YH
   Wu, LP
   Jiang, XG
AF Zhou, Yue-Ying
   Shi, Ji-Chan
   Pan, Ning
   Wu, Zheng-Xing
   Cheng, Ai-Qiong
   Mei, Yan-Hong
   Wu, Lian-Peng
   Jiang, Xian-Gao
TI The value of GeneXpert MTB/RIF in bronchoalveolar lavage fluid in the
   diagnosis of smear-negative pulmonary tuberculosis
SO INVESTIGACION CLINICA
LA English
DT Article
DE bronchoalveolar lavage fluid; Xpert MTB/RIF; tuberculosis; Mycobacterium
   culture; rifampicin resistance
ID POSITIVE RIFAMPICIN RESISTANCE; MYCOBACTERIUM-TUBERCULOSIS; ASSAY;
   PERFORMANCE; FEASIBILITY; PREVALENCE
AB This study aims to evaluate the diagnostic value of Xpert MTB/RIF assay in bronchoalveolar lavage fluid (BALF) in subjects with smear-negative pulmonary tuberculosis. From January 2019 to December 2019, 197 patients with suspected pulmonary tuberculosis were recruited, and bronchoalveolar lavage fluid was collected for acid-fast staining smear, liquid culture of Mycobacterium combined drug sensitivity and Xpert MTB/RIF detection. The sensitivity, specificity, positive predictive value and negative predictive value of Xpert MTB/RIF in bronchoalveolar lavage fluid (BALF) were calculated with smear-negative pulmonary tuberculosis as the reference standard. The consistency of xpert MTB/RIF in the diagnosis of rifampicin resistance was evaluated, with the results of Mycobacterium liquid culture drug sensitivity test and drug sensitivity test as the gold standards. The results showed that among 197 suspected tuberculosis patients, 55 patients were not diagnosed with tuberculosis and 142 patients were diagnosed with smear-negative pulmonary tuberculosis. One hundred and twenty three cases (86.62%) were positive for Xpert MTB/RIF in bronchoalveolar lavage fluid, 15 cases (10.56%) were positive by acid-fast staining smear method, and 88 cases (61.97%) were positive by the liquid culture method. The positive rate of Xpert MTB / RIF was 93.18% (82 / 88), which was higher than that of 75.93% (41 / 54) of the negative BALF mycobacterium culture (chi(2) = 8.598, P<0.01). The sensitivity and specificity of Xpert MTB/RIF for rifampicin resistance were 100.00% and 97.30%, respectively. Therefore, the diagnostic value of Xpert MTB/RIF in bronchoalveolar lavage fluid for bacterial-negative pulmonary tuberculosis is superior to the acid-fast staining smear of lavage fluid and the mycobacterium culture method.
C1 [Zhou, Yue-Ying; Shi, Ji-Chan; Pan, Ning; Wu, Zheng-Xing; Cheng, Ai-Qiong; Mei, Yan-Hong; Wu, Lian-Peng; Jiang, Xian-Gao] Wenzhou Cent Hosp, Dept Infect Dis, Wenzhou, Zhejiang, Peoples R China.
RP Jiang, XG (通讯作者)，Wenzhou Cent Hosp, Dept Infect Dis, Wenzhou, Zhejiang, Peoples R China.
EM jiang_xiangao@126.com
FU Zhejiang Basic Public Welfare Research Project [LG-F18H010003]; Wenzhou
   Science and Technology Bureau Project [Y20180599]
FX This work was founded by Zhejiang Basic Public Welfare Research Project
   (LG-F18H010003) and Wenzhou Science and Technology Bureau Project
   (Y20180599).
CR Blakemore R, 2010, J CLIN MICROBIOL, V48, P2495, DOI 10.1128/JCM.00128-10
   Boehme CC, 2011, LANCET, V377, P1495, DOI 10.1016/S0140-6736(11)60438-8
   Boehme CC, 2010, NEW ENGL J MED, V363, P1005, DOI 10.1056/NEJMoa0907847
   Gao JC, 2016, J CLIN SLEEP MED, V21, P2192
   Geleta DA, 2015, BMC MICROBIOL, V15, DOI 10.1186/s12866-015-0566-6
   Gursoy NC, 2016, MIKROBIYOL BUL, V50, P196, DOI 10.5578/mb.21033
   Haraka F, 2020, EUR RESPIR J, V56, DOI 10.1183/13993003.00343-2020
   [何贵清 He Guiqing], 2016, [中华传染病杂志, Chinese Journal of Infections Diseases], V34, P349
   Hu PL, 2014, CHINESE MED J-PEKING, V127, P3744, DOI 10.3760/cma.j.issn.0366-6999.20141004
   Kurbatova EV, 2013, EUR J CLIN MICROBIOL, V32, P735, DOI 10.1007/s10096-012-1798-0
   Liu JQ, 2016, J CLIN LAB IMMUNOL, V34, P755
   Lu NH, 2015, J CLIN SLEP MED, V20, P207
   Marlowe EM, 2011, J CLIN MICROBIOL, V49, P1621, DOI 10.1128/JCM.02214-10
   Mathys V, 2014, INT J TUBERC LUNG D, V18, P1255, DOI 10.5588/ijtld.14.0297
   Mokaddas E, 2015, J CLIN MICROBIOL, V53, P1351, DOI 10.1128/JCM.03412-14
   Myneedu VP, 2014, INT J TUBERC LUNG D, V18, P958, DOI 10.5588/ijtld.13.0328
   National Health and Family Planning Commission of the people's Republic of China, 2018, ELECT J EMERG INFECT, V3, P59
   Ou XC, 2015, INT J INFECT DIS, V31, P41, DOI 10.1016/j.ijid.2014.09.011
   Park SW, 2011, PLOS PATHOG, V7, DOI 10.1371/journal.ppat.1002264
   Sharma SK, 2015, PLOS ONE, V10, DOI 10.1371/journal.pone.0141011
   Sivaramakrishnan G, 2019, INT J MYCOBACT, V8, P329, DOI 10.4103/ijmy.ijmy_151_19
   Van Deun A, 2020, INT J ANTIMICROB AG, V55, DOI 10.1016/j.ijantimicag.2019.10.003
   Varma-Basil M, 2004, J CLIN MICROBIOL, V42, P5512, DOI 10.1128/JCM.42.12.5512-5516.2004
   Wang LX, 2014, LANCET, V383, P2057, DOI 10.1016/S0140-6736(13)62639-2
   Williamson DA, 2012, DIAGN MICR INFEC DIS, V74, P207, DOI 10.1016/j.diagmicrobio.2012.06.013
   World Health Organization, 2015, WHO APPR NEW RAP DET
   Zhang GuoQin, 2017, China Tropical Medicine, V17, P266
   Zhao JinYun, 2017, Chinese Journal of Nosocomiology, V27, P4340
NR 28
TC 0
Z9 0
U1 3
U2 4
PU INST INVESTIGACION CLINICA
PI MARACAIBO
PA APARTADO 23, MARACAIBO 4001-A, VENEZUELA
SN 0535-5133
EI 2477-9393
J9 INVEST CLIN
JI Invest. Clin.
PY 2021
VL 62
IS 1
BP 28
EP 36
DI 10.22209/IC.v62n1a03
PG 9
WC Medicine, Research & Experimental
WE Science Citation Index Expanded (SCI-EXPANDED)
SC Research & Experimental Medicine
GA RF4FS
UT WOS:000634795800004
OA hybrid
DA 2022-08-20
ER

PT J
AU Chen, PX
   Sun, WW
   He, YY
AF Chen, Peixin
   Sun, Wenwen
   He, Yayi
TI Comparison of metagenomic next-generation sequencing technology, culture
   and GeneXpert MTB/RIF assay in the diagnosis of tuberculosis
SO JOURNAL OF THORACIC DISEASE
LA English
DT Article
DE Metagenomic next-generation sequencing (mNGS) technology; culture
   method; GeneXpert MTB; RIF assay (Xpert); tuberculosis (TB);
   Mycobacterium tuberculosis (Mtb)
ID MYCOBACTERIUM-TUBERCULOSIS; DRUG-RESISTANCE; READ ALIGNMENT;
   SURVEILLANCE; SYSTEM
AB Background: With a high incidence rate and mortality rate, tuberculosis (TB) is a major public health concern worldwide. There is an urgent need to develop the rapid, reliable and affordable diagnostic test for the detection of Mycobacterium tuberculosis (Mtb). Metagenomic next-generation sequencing (mNGS) showed promising values in the rapid diagnosis of clinical TB, while studies on the application of mNGS in pulmonary and extrapulmonary TB remain scarce.
   Methods: In this study, we collected the results of both mNGS and culture of 70 specimens from suspected TB patients at the Shanghai Pulmonary Hospital of Tongji University. Results of GeneXpert MTB/RIF assay (Xpert) were obtained from 19 patients. We also assessed the diagnostic performance, relationship and consistency between mNGS, traditional culture method, and Xpert.
   Results: Overall, 36 of 70 suspected patients were finally diagnosed with TB. The sensitivity, specificity, positive predictive value, negative predictive value and the Youden index of mNGS in all clinical TB specimens were calculated as 66.7% (95% CI: 0.489-0.809), 97.1% (95% CI: 0.829-0.998), 96.0% (95% CI: 0.777-0.998), 73.3% (95% CI: 0.578-0.849), 63.8%, respectively. The sensitivity of mNGS was much superior to that of conventional culture method (66.7%, 95% CI: 0.489-0.809 vs. 36.1%, 95% CI: 0.213-0.538) and Xpert (76.9%, 95% CI: 0.460-0.938 vs. 61.5%, 95% CI: 0.323-0.849). In pulmonary TB cases, mNGS, culture, and Xpert all demonstrated better diagnostic capacity for TB when compared with extrapulmonary TB cases. Among all methods and sample classifications, the Youden index of parallel diagnostic test in pulmonary samples was outstanding (mNGS/culture 88.2%; mNGS/Xpert 100%). Furthermore, the correlation and concordance between mNGS and culture method in all types of specimens was statistically significant (both P<0.001).
   Conclusions: With high sensitivity and specificity, mNGS showed remarkable diagnostic performance in various samples from suspected TB patients. Combining mNGS and culture or Xpert method had the potential for clinical application in TB.
C1 [Chen, Peixin; He, Yayi] Tongji Univ, Shanghai Pulm Hosp, Dept Med Oncol, Med Sch,Canc Inst, 507 Zhengmin Rd, Shanghai 200433, Peoples R China.
   [Chen, Peixin] Tongji Univ, Shanghai, Peoples R China.
   [Sun, Wenwen] Shanghai Pulm Hosp, Dept TB, 507 Zhengmin Rd, Shanghai 200433, Peoples R China.
RP He, YY (通讯作者)，Tongji Univ, Shanghai Pulm Hosp, Dept Med Oncol, Med Sch,Canc Inst, 507 Zhengmin Rd, Shanghai 200433, Peoples R China.; Sun, WW (通讯作者)，Shanghai Pulm Hosp, Dept TB, 507 Zhengmin Rd, Shanghai 200433, Peoples R China.
EM sunwenwen_1583@163.com; 2250601@qq.com
FU National Natural Science Foundation of China [81802255]; Shanghai
   Pujiang Program [17PJD036]; Shanghai Municipal Commission of Health and
   Family Planning Program [20174Y0131]; National Major disease clinical
   skills enhancement program of three year action plan for promoting
   clinical skills and clinical innovation in municipal hospitals, Shanghai
   Shen Kang Hospital Development Center Clinical Research Plan of SHDC
   [16CR1001A]; "Dream Tutor" Outstanding Young Talents Program [fkyq1901];
   Key Disciplines of Shanghai Pulmonary Hospital [2017ZZ02012]; Shanghai
   Science and Technology Commission [16JC1405900]
FX This study was supported in part by a grant from National Natural
   Science Foundation of China (81802255), Shanghai Pujiang Program
   (17PJD036) and a grant from Shanghai Municipal Commission of Health and
   Family Planning Program (20174Y0131), National Major disease clinical
   skills enhancement program of three year action plan for promoting
   clinical skills and clinical innovation in municipal hospitals, Shanghai
   Shen Kang Hospital Development Center Clinical Research Plan of SHDC
   (16CR1001A), "Dream Tutor" Outstanding Young Talents Program (fkyq1901),
   Key Disciplines of Shanghai Pulmonary Hospital (2017ZZ02012), Grant of
   Shanghai Science and Technology Commission (16JC1405900).
CR Allahyartorkaman M, 2019, SCI REP-UK, V9, DOI 10.1038/s41598-019-55112-y
   Boehme CC, 2011, LANCET, V377, P1495, DOI 10.1016/S0140-6736(11)60438-8
   Brown AC, 2015, J CLIN MICROBIOL, V53, P2230, DOI 10.1128/JCM.00486-15
   Burillo A, 2014, BMC INFECT DIS, V14, DOI 10.1186/s12879-014-0593-1
   Causse M, 2011, J CLIN MICROBIOL, V49, P3065, DOI 10.1128/JCM.00491-11
   Chakravorty S, 2017, MBIO, V8, DOI [10.1128/mBio.00812-17, 10.1128/mbio.00812-17]
   Chen YZ, 2020, BIOSCIENCE REP, V40, DOI 10.1042/BSR20191312
   Cole ST, 1998, NATURE, V393, P537, DOI 10.1038/31159
   Diacon AH, 2014, NEW ENGL J MED, V371, P723, DOI 10.1056/NEJMoa1313865
   Doyle RM, 2018, J CLIN MICROBIOL, V56, DOI [10.1128/jcm.00666-18, 10.1128/JCM.00666-18]
   Fan SY, 2018, FRONT NEUROL, V9, DOI 10.3389/fneur.2018.00471
   Fang MX, 2020, BMC INFECT DIS, V20, DOI 10.1186/s12879-020-4872-8
   Groschel MI, 2018, PLOS PATHOG, V14, DOI 10.1371/journal.ppat.1007297
   Gu W, 2019, ANNU REV PATHOL-MECH, V14, P319, DOI 10.1146/annurev-pathmechdis-012418-012751
   Hanna BA, 1999, J CLIN MICROBIOL, V37, P748, DOI 10.1128/JCM.37.3.748-752.1999
   Harding E, 2020, LANCET RESP MED, V8, P19, DOI 10.1016/S2213-2600(19)30418-7
   Krajewski W., 2005, Archives of Medical Science, V1, P80
   Kurtoglu MG, 2014, ARCH MED SCI, V10, P315, DOI 10.5114/aoms.2012.29216
   Li H, 2010, BIOINFORMATICS, V26, P589, DOI 10.1093/bioinformatics/btp698
   Li H, 2009, BIOINFORMATICS, V25, P1754, DOI 10.1093/bioinformatics/btp324
   Long Y, 2016, ARCH MED RES, V47, P365, DOI 10.1016/j.arcmed.2016.08.004
   Lusk RW, 2014, PLOS ONE, V9, DOI 10.1371/journal.pone.0110808
   Lytras T, 2018, J THORAC DIS, V10, pS3149, DOI 10.21037/jtd.2018.08.73
   Ng KCS, 2018, J CLIN MICROBIOL, V56, DOI 10.1128/JCM.00686-18
   Nimmo C, 2017, INT J INFECT DIS, V62, P44, DOI 10.1016/j.ijid.2017.07.007
   Ninet B, 1999, J CLIN MICROBIOL, V37, P782, DOI 10.1128/JCM.37.3.782-784.1999
   Steingart K, 2006, LANCET INFECT DIS, V6, P570, DOI 10.1016/S1473-3099(06)70578-3
   REISNER BS, 1995, DIAGN MICR INFEC DIS, V22, P325, DOI 10.1016/0732-8893(95)00147-7
   Salter SJ, 2014, BMC BIOL, V12, DOI 10.1186/s12915-014-0087-z
   Spitaleri A, 2019, ANN TRANSL MED, V7, DOI 10.21037/atm.2019.07.28
   Sumimoto H, 2017, ANN ONCOL S9, V28, pix84
   Tagliani E, 2018, LANCET INFECT DIS, V18, P377, DOI 10.1016/S1473-3099(18)30132-4
   Tan K, 2017, ANN ONCOL S9, V28, pix79
   Votintseva AA, 2017, J CLIN MICROBIOL, V55, P1285, DOI 10.1128/JCM.02483-16
   Wang JH, 2019, BMC PULM MED, V19, DOI 10.1186/s12890-019-1022-4
   Wilson MR, 2014, NEW ENGL J MED, V370, P2408, DOI 10.1056/NEJMoa1401268
   Zhou X, 2019, FRONT CELL INFECT MI, V9, DOI 10.3389/fcimb.2019.00351
   Zhu ML, 2018, VIRCHOWS ARCH, V473, P371, DOI 10.1007/s00428-018-2393-2
   Zignol M, 2018, LANCET INFECT DIS, V18, P675, DOI 10.1016/S1473-3099(18)30073-2
   Zignol M, 2016, LANCET INFECT DIS, V16, P1185, DOI 10.1016/S1473-3099(16)30190-6
NR 40
TC 9
Z9 12
U1 4
U2 11
PU AME PUBL CO
PI SHATIN
PA FLAT-RM C 16F, KINGS WING PLAZA 1, NO 3 KWAN ST, SHATIN, HONG KONG
   00000, PEOPLES R CHINA
SN 2072-1439
EI 2077-6624
J9 J THORAC DIS
JI J. Thorac. Dis.
PD AUG
PY 2020
VL 12
IS 8
BP 4014
EP +
DI 10.21037/jtd-20-1232
PG 15
WC Respiratory System
WE Science Citation Index Expanded (SCI-EXPANDED)
SC Respiratory System
GA NG7PT
UT WOS:000564173500017
PM 32944313
OA gold, Green Published
DA 2022-08-20
ER

PT J
AU Mullerpattan, J
   Nikam, C
   Sharma, U
   Banka, R
   Prasad, VP
   Rodrigues, C
   Pinto, L
AF Mullerpattan, Jai
   Nikam, Chaitali
   Sharma, Ujjwal
   Banka, Radhika
   Prasad, V. Pratibh
   Rodrigues, Camilla
   Pinto, Lancelot
TI Rifampicin (Rif)-resistant tuberculosis (TB) on GeneXpert in Mumbai,
   India: How effective is the best derived empiric regimen?
SO EUROPEAN RESPIRATORY JOURNAL
LA English
DT Meeting Abstract
DE MDR-TB; Tuberculosis - management
RI Banka, Radhika/AAY-6980-2020
OI Nikam, Chaitali/0000-0002-3834-3936
NR 0
TC 0
Z9 0
U1 0
U2 0
PU EUROPEAN RESPIRATORY SOC JOURNALS LTD
PI SHEFFIELD
PA 442 GLOSSOP RD, SHEFFIELD S10 2PX, ENGLAND
SN 0903-1936
EI 1399-3003
J9 EUR RESPIR J
JI Eur. Resp. J.
PD SEP 1
PY 2016
VL 48
SU 60
MA PA1906
DI 10.1183/13993003.congress-2016.PA1906
PG 2
WC Respiratory System
WE Science Citation Index Expanded (SCI-EXPANDED)
SC Respiratory System
GA VF5GZ
UT WOS:000443059702540
DA 2022-08-20
ER

PT J
AU Hiruy, N
   Melese, M
   Habte, D
   Jerene, D
   Gashu, Z
   Alem, G
   Jemal, I
   Tessema, B
   Belayneh, B
   Suarez, PG
AF Hiruy, Nebiyu
   Melese, Muluken
   Habte, Dereje
   Jerene, Degu
   Gashu, Zewdu
   Alem, Genetu
   Jemal, Ilili
   Tessema, Belay
   Belayneh, Beza
   Suarez, Pedro G.
TI Comparison of the yield of tuberculosis among contacts of
   multidrug-resistant and drug-sensitive tuberculosis patients in Ethiopia
   using GeneXpert as a primary diagnostic test
SO INTERNATIONAL JOURNAL OF INFECTIOUS DISEASES
LA English
DT Article
DE Contact investigation; Multidrug-resistant tuberculosis; Drug-sensitive
   tuberculosis
ID HOUSEHOLD CONTACTS; INFECTION; DISEASE
AB Objectives: This study compared the yield of tuberculosis (TB) among contacts of multidrug-resistant tuberculosis (MDR-TB) index cases with that in drug-sensitive TB (DS-TB) index cases in a program setting.
   Methods: A comparative cross-sectional study was conducted among contacts of sputum smear-positive new DS-TB index cases and MDR-TB index cases. After contacts were screened, GeneXpert was used for the diagnosis of TB.
   Results: The study included 111 MDR-TB and 119 DS-TB index cases. A total of 340 and 393 contacts of MDR-TB and DS-TB index cases, respectively, were traced, of whom 331 among MDR-TB contacts and 353 among DS-TB contacts were screened. There were 20 (6%) presumptive TB cases for MDR-TB contacts and 41 (11%) for DS-TB contacts. The prevalence of TB among MDR-TB contacts was 2.7% and among DS-TB contacts was 4.0%. The majority of the MDR-TB contacts diagnosed with TB had MDR-TB; the reverse was true for DS-TB.
   Conclusions: The yield of TB among contacts of MDR-TB and DS-TB patients using GeneXpert was high as compared to the population-level prevalence. The likelihood of diagnosing rifampicin-resistant TB among contacts of MDR-TB index cases was higher in comparison with contacts of DS-TB index cases. The use of GeneXpert in DS-TB contact investigation has the added advantage of diagnosing rifampicin-resistant TB cases when compared to the use of the nationally recommended acid-fast bacillus (AFB) microscopy for DS-TB contact investigation. (C) 2018 The Authors. Published by Elsevier Ltd on behalf of International Society for Infectious Diseases.
C1 [Hiruy, Nebiyu; Melese, Muluken; Habte, Dereje; Jerene, Degu; Gashu, Zewdu; Belayneh, Beza] Management Sci Hlth, Help Ethiopia Address Low Performance TB HEAL TB, Kebele 02,House 708,POB 1157,Code 1250, Addis Ababa, Ethiopia.
   [Alem, Genetu] Amhara Reg Hlth Bur, Bahir Dar, Ethiopia.
   [Jemal, Ilili] Oromia Reg Hlth Bur, Addis Ababa, Ethiopia.
   [Tessema, Belay] Univ Gondar, Gondar, Ethiopia.
   [Suarez, Pedro G.] Management Sci Hlth, Hlth Programs Grp, Arlington, VA USA.
RP Hiruy, N (通讯作者)，Management Sci Hlth, Help Ethiopia Address Low Performance TB HEAL TB, Kebele 02,House 708,POB 1157,Code 1250, Addis Ababa, Ethiopia.
EM nhiruy@msh.org; mmelese@msh.org; dhabte@msh.org; djerene@msh.org;
   zgashu@msh.org; genetu33@yahoo.com; ilili.jemal2020@gmail.com;
   bt1488@yahoo.com; bbelayneh@msh.org; psuarez@msh.org
RI Tes, Bel/L-3858-2019; Suarez, Pedro G/AAD-2278-2019
OI Suarez, Pedro G/0000-0001-9825-1761; Habte, Dereje/0000-0002-4720-4188
FU United States Agency for International Development (USAID) through
   Management Sciences for Health - The Help Ethiopia Address Low
   Tuberculosis Performance Project (HEAL TB) [AID-663-A-11-00011]
FX The United States Agency for International Development (USAID) supported
   this work through Management Sciences for Health - The Help Ethiopia
   Address Low Tuberculosis Performance Project (HEAL TB), under
   cooperative agreement number [AID-663-A-11-00011]. The contents of the
   article are the responsibility of the authors alone and do not
   necessarily reflect the views of USAID or the United States government.
CR BARNETT M, 1953, BRIT J EXP PATHOL, V34, P568
   Blok L, 2015, PLOS ONE, V10, DOI 10.1371/journal.pone.0119822
   Burgos M, 2003, J INFECT DIS, V188, P1878, DOI 10.1086/379895
   COHN ML, 1954, AM REV TUBERC PULM, V70, P641
   Fair E, 2015, INT J TUBERC LUNG D, V19, P269, DOI 10.5588/ijtld.14.0512
   Federal Democratic Republic of Ethiopia Central Statistics Agency (CSA), 2013, POP PROJ ETH REG WER
   Federal Democratic Republic of Ethiopia Ethiopian Public Health Institute (EPHI), 2012, PREL RES 2 NAT TUB D
   Federal Democratic Republic of Ethiopia Ministry of Health (MOH)/ Ethiopian Health Nutrition Research Institute (EHNRI), 2011, 1 ETH NAT POP BAS TU
   Federal Ministry of Health Ethiopia, 2016, CLIN PROGR GUID DRUG
   Garcia-Garcia MD, 2000, ARCH INTERN MED, V160, P630, DOI 10.1001/archinte.160.5.630
   Gashu Z, 2016, PLOS ONE, V11, DOI 10.1371/journal.pone.0160514
   Grandjean L, 2011, INT J TUBERC LUNG D, V15, P1164, DOI 10.5588/ijtld.11.0030
   Grandjean L, 2015, PLOS MED, V12, DOI 10.1371/journal.pmed.1001843
   Jerene D, 2015, INT J TUBERC LUNG D, V19, P898, DOI 10.5588/ijtld.14.0978
   MITCHISON DA, 1954, BRIT MED J, V1, P128, DOI 10.1136/bmj.1.4854.128
   Nitta AT, 2002, AM J RESP CRIT CARE, V165, P812, DOI 10.1164/ajrccm.165.6.2103109
   Otero L, 2016, BMC INFECT DIS, V16, DOI 10.1186/s12879-016-1616-x
   Parr JB, 2014, CLIN INFECT DIS, V58, P392, DOI 10.1093/cid/cit709
   Shah NS, 2014, CLIN INFECT DIS, V58, P381, DOI 10.1093/cid/cit643
   Single N, 2011, INT J TUBERC LUNG D, V15, P1326, DOI 10.5588/ijtld.10.0564
   SNIDER DE, 1985, AM REV RESPIR DIS, V132, P125
   Teixeira L, 2001, INT J TUBERC LUNG D, V5, P321
   Titiyos Addisalem, 2015, BMC Res Notes, V8, P501, DOI 10.1186/s13104-015-1442-z
   van Soolingen D, 1999, J INFECT DIS, V180, P726, DOI 10.1086/314930
   WHO, 2016, GLOB TUB REP
   Widelock D, 1955, AM J PUBLIC HEALTH N, V45, pA79, DOI 10.2105/AJPH.45.1.79
   World Health Organization, 2012, WHOHTMTB20129
NR 27
TC 7
Z9 7
U1 0
U2 3
PU ELSEVIER SCI LTD
PI OXFORD
PA THE BOULEVARD, LANGFORD LANE, KIDLINGTON, OXFORD OX5 1GB, OXON, ENGLAND
SN 1201-9712
EI 1878-3511
J9 INT J INFECT DIS
JI Int. J. Infect. Dis.
PD JUN
PY 2018
VL 71
BP 4
EP 8
DI 10.1016/j.ijid.2018.03.011
PG 5
WC Infectious Diseases
WE Science Citation Index Expanded (SCI-EXPANDED)
SC Infectious Diseases
GA GI3XV
UT WOS:000434306300002
PM 29559367
OA gold
DA 2022-08-20
ER

PT J
AU Meyer, AJ
   Atuheire, C
   Worodria, W
   Kizito, S
   Katamba, A
   Sanyu, I
   Andama, A
   Ayakaka, I
   Cattamanchi, A
   Bwanga, F
   Huang, L
   Davis, JL
AF Meyer, Amanda J.
   Atuheire, Collins
   Worodria, William
   Kizito, Samuel
   Katamba, Achilles
   Sanyu, Ingvar
   Andama, Alfred
   Ayakaka, Irene
   Cattamanchi, Adithya
   Bwanga, Freddie
   Huang, Laurence
   Davis, J. Lucian
TI Sputum quality and diagnostic performance of GeneXpert MTB/RIF among
   smear-negative adults with presumed tuberculosis in Uganda
SO PLOS ONE
LA English
DT Article
ID HUMAN-IMMUNODEFICIENCY-VIRUS; PULMONARY TUBERCULOSIS; XPERT MTB/RIF;
   MICROSCOPY; IMPACT; ASSAY
AB Background
   Introduction of GeneXpert MTB/RIF (Xpert) assay has constituted a major breakthrough for tuberculosis (TB) diagnostics. Several patient factors may influence diagnostic performance of Xpert including sputum quality. Objective We carried out a prospective, observational, cross-sectional study to determine the effect of sputum quality on diagnostic performance of Xpert among presumed TB patients in Uganda.
   Methods
   We collected clinical and demographic information and two sputum samples from participants. Staff recorded sputum quality and performed LED fluorescence microscopy and mycobacterial culture on each sample. If both smear examinations were negative, Xpert testing was performed. We calculated diagnostic yield, sensitivity, specificity, and other indicators for Xpert for each stratum of sputum quality in reference to a standard of mycobacterial culture.
   Results
   Patients with salivary sputum showed a trend towards a substantially higher proportion of samples that were Xpert-positive (54/286, 19%, 95% CI 15-24) compared with those with all other sputum sample types (221/1496, 15%, 95% CI 13-17). Blood-stained sputum produced the lowest sensitivity (28%; 95% CI 12-49) and salivary sputum the highest (66%; 95% CI 53-77). Specificity didn't vary meaningfully by sample types. Salivary sputum was significantly more sensitive than mucoid sputum (+ 13%, 95% CI + 1 to + 26), while bloodstained sputum was significantly less sensitive (-24%, 95% CI -42 to -5).
   Conclusions
   Our findings demonstrate the need to exercise caution in collecting sputum for Xpert and in interpreting results because sputum quality may impact test yield and sensitivity. In particular, it may be wise to pursue additional testing should blood-stained sputum test negative while salivary sputum should be readily accepted for Xpert testing given its higher sensitivity and potentially higher yield than other sample types. These findings challenge conventional recommendations against collecting salivary sputum for TB diagnosis and could inform new standards for sputum quality.
C1 [Meyer, Amanda J.; Davis, J. Lucian] Yale Sch Publ Hlth, Dept Epidemiol Microbial Dis, New Haven, CT USA.
   [Atuheire, Collins] Africa Renewal Univ, Dept Hlth Sci & Special Educ, Kampala, Uganda.
   [Worodria, William; Andama, Alfred] Makerere Univ, Mulago Hosp, Dept Med, Kampala, Uganda.
   [Kizito, Samuel; Katamba, Achilles] Makerere Univ, Clin Epidemiol Unit, Kampala, Uganda.
   [Sanyu, Ingvar; Andama, Alfred; Ayakaka, Irene] Mulago Hosp, Infect Dis Res Collaborat, Kampala, Uganda.
   [Cattamanchi, Adithya; Huang, Laurence] Univ Calif San Francisco, Div Pulm & Crit Care Med, San Francisco, CA 94143 USA.
   [Bwanga, Freddie] Makerere Univ, Dept Microbiol, Kampala, Uganda.
   [Huang, Laurence] Univ Calif San Francisco, Div HIV Infect Dis & Global Med, San Francisco, CA 94143 USA.
   [Davis, J. Lucian] Yale Sch Med, Pulm Crit Care & Sleep Med Sect, New Haven, CT USA.
RP Davis, JL (通讯作者)，Yale Sch Publ Hlth, Dept Epidemiol Microbial Dis, New Haven, CT USA.; Davis, JL (通讯作者)，Yale Sch Med, Pulm Crit Care & Sleep Med Sect, New Haven, CT USA.
EM lucian.davis@yale.edu
RI Huang, Laurence/AAE-1590-2019; Davis, J. Lucian/AAC-8376-2019; Samuel,
   Kizito/AAE-5463-2020; Huang, Laurence/AAZ-7120-2021
OI Davis, J. Lucian/0000-0002-8629-9992; Huang,
   Laurence/0000-0003-3888-2195; Kizito, Samuel/0000-0003-2413-0398; Gupta,
   Amanda J/0000-0003-2318-1783
FU National Institutes of Health [R01HL090335, U01HL098964, R01HL128156,
   K23AI080147]; NATIONAL HEART, LUNG, AND BLOOD INSTITUTE [R01HL128156,
   R01HL090335, K24HL087713, U01HL098964] Funding Source: NIH RePORTER
FX This study was supported by the National Institutes of Health, through
   the following grants: R01HL090335 (LH), U01HL098964 (LH), R01HL128156
   (LH), and K23AI080147 (JLD). In addition, the training and mentoring
   support provided by D43TW009607 (CA, SK, AK, JLD) and K24HL087713 (LH)
   were critical to the study. The funder had no role in the study design,
   data collection and analysis, decision to publish, or preparation of the
   manuscript.
CR [Anonymous], 2011, AUT REAL TIM NUCL AC
   Boehme CC, 2010, NEW ENGL J MED, V363, P1005, DOI 10.1056/NEJMoa0907847
   Cattamanchi A, 2011, AM J RESP CRIT CARE, V183, P547, DOI 10.1164/rccm.201008-1207OC
   Chihota VN, 2010, INT J TUBERC LUNG D, V14, P1024
   Churchyard GJ, 2015, LANCET GLOB HEALTH, V3, pE450, DOI 10.1016/S2214-109X(15)00100-X
   Davis JL, 2010, PLOS ONE, V5, DOI 10.1371/journal.pone.0009859
   ELLIOTT AM, 1993, J TROP MED HYG, V96, P1
   ELLIOTT AM, 1993, TUBERCLE LUNG DIS, V74, P191, DOI 10.1016/0962-8479(93)90010-U
   Getahun H, 2007, LANCET, V369, P2042, DOI 10.1016/S0140-6736(07)60284-0
   Githui W., 2014, AFRICAN J HLTH SCI, V27, P446
   Hanrahan CF, 2016, OPEN FORUM INFECT DI, V3, DOI 10.1093/ofid/ofw068
   Ho J, 2016, INT J TUBERC LUNG D, V20, P319, DOI 10.5588/ijtld.15.0620
   Ho J, 2015, INT J TUBERC LUNG D, V19, P537, DOI 10.5588/ijtld.14.0798
   JONES BE, 1993, AM REV RESPIR DIS, V148, P1292, DOI 10.1164/ajrccm/148.5.1292
   Kalema N, 2012, PLOS ONE, V7, DOI 10.1371/journal.pone.0038888
   Khan MS, 2007, LANCET, V369, P1955, DOI 10.1016/S0140-6736(07)60916-7
   Kyeyune R, 1999, J ACQ IMMUN DEF SYND, V55, P446
   Sharma SK, 2015, PLOS ONE, V10, DOI 10.1371/journal.pone.0141011
   Steingart KR, 2014, COCHRANE DB SYST REV, DOI [10.1002/14651858.CD009593.pub3, 10.1002/14651858.CD009593.pub2]
   Stop TB Partnership Geneva Global Laboratory Initiative, 2013, HDB STOP TB PARTN
   Theron G, 2014, LANCET, V383, P424, DOI 10.1016/S0140-6736(13)62073-5
   Theron G, 2011, AM J RESP CRIT CARE, V184, P132, DOI 10.1164/rccm.201101-0056OC
   Vassall A, 2011, PLOS MED, V8, DOI 10.1371/journal.pmed.1001120
   Walusimbi S, 2013, INT J MYCOBACT, V2, P148, DOI 10.1016/j.ijmyco.2013.06.001
   Wilson IG, 1997, APPL ENVIRON MICROB, V63, P3741, DOI 10.1128/AEM.63.10.3741-3751.1997
   World Health Organization, 2013, AUT REALT NUCL AC AM
   Worodria W, 2010, EUR RESPIR J, V36, P446, DOI 10.1183/09031936.00010210
   Yoon SH, 2012, BMC INFECT DIS, V12, DOI 10.1186/1471-2334-12-172
NR 28
TC 26
Z9 27
U1 0
U2 2
PU PUBLIC LIBRARY SCIENCE
PI SAN FRANCISCO
PA 1160 BATTERY STREET, STE 100, SAN FRANCISCO, CA 94111 USA
SN 1932-6203
J9 PLOS ONE
JI PLoS One
PD JUL 7
PY 2017
VL 12
IS 7
AR e0180572
DI 10.1371/journal.pone.0180572
PG 12
WC Multidisciplinary Sciences
WE Science Citation Index Expanded (SCI-EXPANDED)
SC Science & Technology - Other Topics
GA FA5DZ
UT WOS:000405464100076
PM 28686705
OA Green Published, Green Submitted, gold
DA 2022-08-20
ER

PT J
AU Reechaipichitkul, W
   Suleesathira, T
   Chaimanee, P
AF Reechaipichitkul, Wipa
   Suleesathira, Tanapong
   Chaimanee, Prajaub
TI COMPARISON OF GENEXPERT MTB/RIF ASSAY WITH CONVENTIONAL AFB SMEAR FOR
   DIAGNOSIS OF PULMONARY TUBERCULOSIS IN NORTHEASTERN THAILAND
SO SOUTHEAST ASIAN JOURNAL OF TROPICAL MEDICINE AND PUBLIC HEALTH
LA English
DT Article
DE Mycobacterium tuberculosis; GeneXpert MTB/RIF assay; AFB smear;
   pulmonary tuberculosis
ID MICROSCOPY; RISK
AB Among infectious agents, Mycobacterium tuberculosis remains one of the most significant causes of death worldwide. Rapid and accurate diagnosis of pulmonary tuberculosis (TB) remains a great challenge. GeneXpert MTB/RIF assay is a novel integrated diagnostic system for rapid diagnosis of TB and particularly of rifampicin-resistant strains. A study was conducted between January 2010 and December 2014 to compare the performance of the sputum GeneXpert MTB/RIF assay with the conventional sputum AFB smear for diagnosis of active pulmonary TB in Thailand, a country with a high burden of this disease. Of the 125 patients who had cough and/or prolonged fever together with abnormal chest radiograph, 63 were diagnosed as having pulmonary TB by mycobacterium culture assay, while the remaining subjects were considered of having TB-like conditions, viz non-tuberculous mycobacterium infection (NTM), bacterial pneumonia or bronchogenic carcinoma. Two-thirds of the patients had underlying diseases, eg, diabetes mellitus (19 patients), autoimmune diseases (14), and HIV (6). Among patients with positive diagnosis of M. tuberculosis infection, 30 were AFB smear positive and 53 by sputum GeneXpert MTB/RIF method; among patients negative for M. tuberculosis infection, 4 were AFB smear positive and 5 by GeneXpert MTB/ RIF assay. Sensitivity and specificity of the sputum AFB smear and GeneXpertMTB/ RIF assay test were 48% (95% CI: 35-61) and 84% (95% CI: 73-92), and 94% (95% CI: 84-98) and 92% (95% CI: 82-97), respectively. Diagnostic performance of the GeneXpert MTB/RIF assay among AFB smear positive patients was higher than among AFB smear negative patients (adjusted OR 6.7; 95% CI: 2.3-19.9). Earlier diagnosis of pulmonary TB using GeneXpert MTB/RIF assay will lead to earlier appropriate treatment and provide opportunities to interrupt TB transmission.
C1 [Reechaipichitkul, Wipa; Suleesathira, Tanapong] Khon Kaen Univ, Fac Med, Dept Med, Div Pulm Unit, Khon Kaen 40002, Thailand.
   [Chaimanee, Prajaub] Khon Kaen Univ, Srinagarind Hosp, Clin Lab Sect, Khon Kaen, Thailand.
RP Reechaipichitkul, W (通讯作者)，Khon Kaen Univ, Fac Med, Dept Med, Div Pulm Unit, Khon Kaen 40002, Thailand.
EM wipree@yahoo.com
FU Faculty of Medicine, Khon Kaen University
FX The authors thank the Faculty of Medicine, Khon Kaen University for
   support, and Prof David Blair, Khon Kaen University Publication Clinic
   KKU for editing the manuscript.
CR Boehme CC, 2010, NEW ENGL J MED, V363, P1005, DOI 10.1056/NEJMoa0907847
   Cain KP, 2010, NEW ENGL J MED, V362, P707, DOI 10.1056/NEJMoa0907488
   CDC, 1995, MMWR-MORBID MORTAL W, V44, P19
   Davies PDO, 2008, INT J TUBERC LUNG D, V12, P1226
   Elkington P, 2015, AM J RESP CRIT CARE, V192, P793, DOI 10.1164/rccm.201505-1009UP
   Erdozain JG, 2006, LUPUS, V15, P232, DOI 10.1191/0961203306lu2289xx
   Gebreegziabher SB, 2016, PLOS ONE, V11, DOI 10.1371/journal.pone.0159579
   Jeon CY, 2008, PLOS MED, V5, P1091, DOI 10.1371/journal.pmed.0050152
   Jeon K, 2005, INT J TUBERC LUNG D, V9, P1046
   Lawn SD, 2013, LANCET INFECT DIS, V13, P349, DOI 10.1016/S1473-3099(13)70008-2
   Lin SYG, 2014, CLIN LAB MED, V34, P297, DOI 10.1016/j.cll.2014.02.005
   LIPSKY BA, 1984, REV INFECT DIS, V6, P214
   Opota O, 2016, CLIN MICROBIOL INFEC, V22, P613, DOI 10.1016/j.cmi.2016.04.010
   Singhal R, 2015, INT J MYCOBACT, V4, P1, DOI 10.1016/j.ijmyco.2014.12.006
   Steingart KR, 2014, COCHRANE DB SYST REV, DOI [10.1002/14651858.CD009593.pub3, 10.1002/14651858.CD009593.pub2]
   Castro ATE, 2015, REV PORT PNEUMOL, V21, P185, DOI 10.1016/j.rppnen.2014.09.010
   Van Rie A, 2013, INT J TUBERC LUNG D, V17, P368, DOI 10.5588/ijtld.12.0392
   WHO, 2020, GLOB TUB REP
   WHO, 2010, GUID TREATM TUB
   WHO-World Health Organisation, 2016, TUB FACT SHEET
   World Health Organization, 2015, POL FRAM
   World Health Organization (WHO), 2010, STOP TB DEP ROADM RO
NR 22
TC 8
Z9 8
U1 0
U2 6
PU SOUTHEAST ASIAN MINISTERS EDUC ORGANIZATION
PI BANGKOK
PA SEAMEO-TROPMED, 420-6 RAJVITHI RD,, BANGKOK 10400, THAILAND
SN 0125-1562
J9 SE ASIAN J TROP MED
JI Southeast Asian J. Trop. Med. Public Health
PD MAR
PY 2017
VL 48
IS 2
BP 313
EP 321
PG 9
WC Public, Environmental & Occupational Health; Infectious Diseases;
   Tropical Medicine
WE Science Citation Index Expanded (SCI-EXPANDED)
SC Public, Environmental & Occupational Health; Infectious Diseases;
   Tropical Medicine
GA EU2TM
UT WOS:000400882800005
PM 29641882
DA 2022-08-20
ER

PT J
AU Davis, JL
   Kawamura, LM
   Chaisson, LH
   Grinsdale, J
   Benhammou, J
   Ho, C
   Babst, A
   Banouvong, H
   Metcalfe, JZ
   Pandori, M
   Hopewell, PC
   Cattamanchi, A
AF Davis, J. Lucian
   Kawamura, L. Masae
   Chaisson, Lelia H.
   Grinsdale, Jennifer
   Benhammou, Jihane
   Ho, Christine
   Babst, Anna
   Banouvong, Houmpheng
   Metcalfe, John Z.
   Pandori, Mark
   Hopewell, Philip C.
   Cattamanchi, Adithya
TI Impact of GeneXpert MTB/RIF on Patients and Tuberculosis Programs in a
   Low-Burden Setting A Hypothetical Trial
SO AMERICAN JOURNAL OF RESPIRATORY AND CRITICAL CARE MEDICINE
LA English
DT Article
DE tuberculosis; diagnosis; health care quality assurance; operations
   research; public health
ID ACID AMPLIFICATION TESTS; PULMONARY TUBERCULOSIS; COST-EFFECTIVENESS;
   LABORATORY DIAGNOSIS; ACCURACY
AB Rationale: Guidelines recommend routine nucleic-acid amplification testing in patients with presumed tuberculosis (TB), but these tests have not been widely adopted. GeneXpert MTB/RIF (Xpert), a novel, semiautomated TB nucleic-acid amplification test, has renewed interest in this technology, but data from low-burden countries are limited.
   Objectives: We sought to estimate Xpert's potential clinical and public health impact on empiric treatment, contact investigation, and housing in patients undergoing TB evaluation.
   Methods: We performed a prospective, cross-sectional study with 2-month follow-up comparing Xpert with standard strategies for evaluating outpatients for active pulmonary TB at the San Francisco Department of Public Health TB Clinic between May 2010 and June 2011. We calculated the diagnostic accuracy of standard algorithms for initial empiric TB treatment, contact investigation, and housing in reference to three Mycobacterium tuberculosis sputum cultures, as compared with that of a single sputum Xpert test. We estimated the incremental diagnostic value of Xpert, and the hypothetical reductions in unnecessary treatment, contact investigation, and housing if Xpert were adopted to guide management decisions.
   Measurements and Main Results: A total of 156 patients underwent Xpert testing. Fifty-nine (38%) received empiric TB treatment. Thirteen (8%) had culture-positive TB. Xpert-guided management would have hypothetically decreased overtreatment by 94%, eliminating a median of 44 overtreatment days (interquartile range, 43-47) per patient and 2,169 total overtreatment days (95% confidence interval, 1,938-2,400) annually, without reducing early detection of TB patients. We projected similar benefits for contact investigation and housing.
   Conclusions: Xpert could greatly reduce the frequency and impact of unnecessary empiric treatment, contact investigation, and housing, providing substantial patient and programmatic benefits if used in management decisions.
C1 [Davis, J. Lucian; Chaisson, Lelia H.; Metcalfe, John Z.; Hopewell, Philip C.; Cattamanchi, Adithya] Univ Calif San Francisco, San Francisco Gen Hosp, Dept Med, Div Pulm & Crit Care Med, San Francisco, CA 94143 USA.
   [Davis, J. Lucian; Metcalfe, John Z.; Hopewell, Philip C.; Cattamanchi, Adithya] Univ Calif San Francisco, San Francisco Gen Hosp, Curry Int TB Ctr, Dept Med, San Francisco, CA 94143 USA.
   [Kawamura, L. Masae; Grinsdale, Jennifer; Banouvong, Houmpheng] San Francisco Dept Publ Hlth, TB Sect, San Francisco, CA USA.
   [Babst, Anna; Pandori, Mark] San Francisco Dept Publ Hlth, Publ Hlth Lab, San Francisco, CA USA.
   [Benhammou, Jihane] Univ Calif Los Angeles, Dept Med, Los Angeles, CA 90024 USA.
   [Ho, Christine] Ctr Dis Control & Prevent, Atlanta, GA USA.
RP Davis, JL (通讯作者)，San Francisco Gen Hosp, Room 5K1,1001 Potrero Ave, San Francisco, CA 94110 USA.
EM lucian.davis@ucsf.edu
RI Davis, J. Lucian/AAC-8376-2019
OI Davis, J. Lucian/0000-0002-8629-9992; Metcalfe, John/0000-0002-2279-7036
FU American Lung Association [CG-197164]; UCSF Center for AIDS Research;
   National Institutes of Health [K23 AI080147, K23 HL094141, K23 AI094251,
   R01 AI076476, U01 AI088679]; National Center for Research Resources [KL2
   RR024130]; NATIONAL CENTER FOR ADVANCING TRANSLATIONAL SCIENCES
   [KL2TR000143] Funding Source: NIH RePORTER; NATIONAL CENTER FOR RESEARCH
   RESOURCES [KL2RR024130] Funding Source: NIH RePORTER; NATIONAL HEART,
   LUNG, AND BLOOD INSTITUTE [K23HL094141] Funding Source: NIH RePORTER;
   NATIONAL INSTITUTE OF ALLERGY AND INFECTIOUS DISEASES [R01AI076476,
   U01AI088679, K23AI080147, K23AI094251] Funding Source: NIH RePORTER
FX Supported by American Lung Association grant CG-197164 (J.L.D.); the
   UCSF Center for AIDS Research (J.L.D.); National Institutes of Health
   grants (K23 AI080147 (J.L.D.), K23 HL094141 (A.C.), K23 AI094251
   (J.Z.M.), and R01 AI076476 and U01 AI088679 (P.C.H.); and National
   Center for Research Resources grant KL2 RR024130 (UCSF Clinical and
   Translational Sciences Institute). The funders had no role in study
   design, data collection and analysis, decision to publish, or
   preparation of the manuscript. The findings and conclusions in this
   report are those of the authors and do not necessarily represent the
   official position of the U.S. CDC.
CR American Thoracic Society, 2003, MMWR RECOMM REP, V52, P1
   Anonymous, 2009, Morbidity and Mortality Weekly Report, V58, P7
   [Anonymous], 2000, JAMA-J AM MED ASSOC, V284, P826
   [Anonymous], 2011, AUT REAL TIM NUCL AC
   Boehme CC, 2011, LANCET, V377, P1495, DOI 10.1016/S0140-6736(11)60438-8
   Boehme CC, 2010, NEW ENGL J MED, V363, P1005, DOI 10.1056/NEJMoa0907847
   Bossuyt PMM, 2000, LANCET, V356, P1844, DOI 10.1016/S0140-6736(00)03246-3
   Bowles EC, 2011, INT J TUBERC LUNG D, V15, P988, DOI 10.5588/ijtld.10.0574
   Brunet L, 2010, AM J RESP CRIT CARE, pA2255
   Cassel CK, 2012, JAMA-J AM MED ASSOC, V307, P1801, DOI 10.1001/jama.2012.476
   Catanzaro A, 2000, JAMA-J AM MED ASSOC, V283, P639, DOI 10.1001/jama.283.5.639
   Centers for Disease Control and Prevention (CDC), 1996, MMWR Morb Mortal Wkly Rep, V45, P950
   Centers for Disease Control and Prevention (CDC), 2012, REP TUB US 2011
   Choi HW, 2013, INT J TUBERC LUNG D, V17, P1328, DOI 10.5588/ijtld.13.0095
   Conaty SJ, 2005, J INFECTION, V50, P187, DOI 10.1016/j.jinf.2004.03.010
   Cummings P, 2003, ARCH PEDIAT ADOL MED, V157, P321, DOI 10.1001/archpedi.157.4.321
   Davis JL, 2011, AM J RESP CRIT CARE, pA5314, DOI 10.1164/ajrccm-conference.2011.183.1_meetingabstracts.a5314
   Dorman SE, 2009, CLIN INFECT DIS, V49, P55, DOI 10.1086/599038
   Dowdy DW, 2012, CLIN INFECT DIS, V55, P1522, DOI 10.1093/cid/cis736
   Dowdy DW, 2011, PLOS MED, V8, DOI 10.1371/journal.pmed.1001063
   Dowdy DW, 2003, J CLIN MICROBIOL, V41, P948, DOI 10.1128/JCM.41.3.948-953.2003
   Drobniewski FA, 2003, LANCET INFECT DIS, V3, P141, DOI 10.1016/S1473-3099(03)00544-9
   Drobniewski FA, 1999, J CLIN PATHOL, V52, P334, DOI 10.1136/jcp.52.5.334
   Dunlap NE, 2000, AM J RESP CRIT CARE, V161, P1376, DOI 10.1164/ajrccm.161.4.16141
   Dylewski J, 2009, CLIN INFECT DIS, V49, P1456, DOI 10.1086/644497
   Gawande A., 2009, NEW YORKER
   GORDIN FM, 1989, AM REV RESPIR DIS, V139, P1090, DOI 10.1164/ajrccm/139.5.1090
   Greco S, 2006, THORAX, V61, P783, DOI 10.1136/thx.2005.054908
   Guerra RL, 2007, CHEST, V132, P946, DOI 10.1378/chest.06-2959
   Hughes R, 2012, RESP MED, V106, P300, DOI 10.1016/j.rmed.2011.10.005
   Iademarco MF, 2013, MMWR-MORBID MORTAL W, V62, P821
   Jensen Paul A., 2005, Morbidity and Mortality Weekly Report, V54, P1
   Kent P. T., 1985, PUBLIC HLTH MYCOBACT
   Lawn SD, 2012, CLIN INFECT DIS, V54, P1071, DOI 10.1093/cid/cir1039
   Lord SJ, 2006, ANN INTERN MED, V144, P850, DOI 10.7326/0003-4819-144-11-200606060-00011
   Lord Sarah J, 2009, Med Decis Making, V29, pE1, DOI 10.1177/0272989X09340584
   Marks SM, 2013, CLIN INFECT DIS, V57, P532, DOI 10.1093/cid/cit336
   Marlowe EM, 2011, J CLIN MICROBIOL, V49, P1621, DOI 10.1128/JCM.02214-10
   Nicolau I, 2012, PLOS ONE, V7, DOI 10.1371/journal.pone.0042479
   Nightingale SL, 1996, JAMA-J AM MED ASSOC, V275, P585, DOI 10.1001/jama.275.8.585
   Ormerod P, 2000, THORAX, V55, P887
   Park PH, 2013, INT J TUBERC LUNG D, V17, P759, DOI 10.5588/ijtld.12.0739
   Sarmiento OL, 2003, J CLIN MICROBIOL, V41, P3233, DOI 10.1128/JCM.41.7.3233-3240.2003
   Schunemann HJ, 2008, BMJ-BRIT MED J, V336, P1106, DOI 10.1136/bmj.39500.677199.AE
   Small PM, 2010, NEW ENGL J MED, V363, P1070, DOI 10.1056/NEJMe1008496
   Sohn H, 2014, CLIN INFECT DIS, V58, P970, DOI 10.1093/cid/ciu022
   Steingart KR, 2014, COCHRANE DB SYST REV, DOI [10.1002/14651858.CD009593.pub3, 10.1002/14651858.CD009593.pub2]
   Stop TB Partnership, 2011, STOP TB PARTN GLOB F
   Taegtmeyer M, 2008, THORAX, V63, P317, DOI 10.1136/thx.2007.083816
   Taylor Zachary, 2005, Morbidity and Mortality Weekly Report, V54, P1
   Theron G, 2011, AM J RESP CRIT CARE, V184, P132, DOI 10.1164/rccm.201101-0056OC
   US Food and Drug Administration, 2013, FDA PERM MARK 1 US T
NR 52
TC 24
Z9 25
U1 0
U2 10
PU AMER THORACIC SOC
PI NEW YORK
PA 25 BROADWAY, 18 FL, NEW YORK, NY 10004 USA
SN 1073-449X
EI 1535-4970
J9 AM J RESP CRIT CARE
JI Am. J. Respir. Crit. Care Med.
PD JUN 15
PY 2014
VL 189
IS 12
BP 1551
EP 1559
DI 10.1164/rccm.201311-1974OC
PG 9
WC Critical Care Medicine; Respiratory System
WE Science Citation Index Expanded (SCI-EXPANDED)
SC General & Internal Medicine; Respiratory System
GA AK3KI
UT WOS:000338322000020
PM 24869625
OA Green Published
DA 2022-08-20
ER

PT J
AU Bunsow, E
   Ruiz-Serrano, MJ
   Roa, PL
   Kestler, M
   Viedma, DG
   Bouza, E
AF Bunsow, Eleonora
   Jesus Ruiz-Serrano, Maria
   Lopez Roa, Paula
   Kestler, Martha
   Garcia Viedma, Dario
   Bouza, Emilio
TI Evaluation of GeneXpert MTB/RIF for the detection of Mycobacterium
   tuberculosis and resistance to rifampin in clinical specimens
SO JOURNAL OF INFECTION
LA English
DT Article
DE Tuberculosis; GeneXpert; Rifampin-resistant; Molecular diagnosis
ID XPERT MTB/RIF; RAPID DIAGNOSIS; ASSAY; PULMONARY
AB Objectives: GeneXpert (GX) is a novel real-time polymerase chain reaction assay for the simultaneous detection of Mycobacterium tuberculosis (MTB) and resistance to rifampin (RIF). We evaluated the performance of GX for direct detection of MTB in respiratory and non-respiratory specimens and assessed the ability of the assay to detect resistance to RIF in non-tuberculosis (TB) endemic country.
   Methods: We analyzed 595 clinical samples in a 1550-bed tertiary hospital in Madrid, Spain. Specimens were processed using GX, auramine smear, conventional culture, and drug phenotypic susceptibility testing (DST) with MGIT SIRE (BD).
   Results: Of the 595 clinical samples, 305 (51.3%) were non-respiratory and 290 (48.7%) were respiratory. In total, MTB was isolated in 81 specimens, 71 of which were positive with GX. The sensitivity, specificity, PPV, and NPV of the GX were: 97.1%, 98.6%, 95.7% and 99.1% for respiratory samples and 33.3%, 99.7%, 80.0% and 97.3% for non-respiratory. GX detected 8 RIF-resistant samples, but only 5 were confirmed by DST.
   Conclusions: GX is an accurate, easy-to-apply and rapid test to detect MTB, especially in smear-positive respiratory samples. Although is a useful tool for the rapid identification of RIF-resistant MTB strains, the rifampin resistant results should be confirmed by DST. (C) 2013 The British Infection Association. Published by Elsevier Ltd. All rights reserved.
C1 [Bunsow, Eleonora; Jesus Ruiz-Serrano, Maria; Lopez Roa, Paula; Kestler, Martha; Garcia Viedma, Dario; Bouza, Emilio] Hosp Gen Univ Gregorio Maranon, Dept Clin Microbiol & Infect Dis, Madrid 28007, Spain.
   [Bouza, Emilio] Univ Complutense Madrid, Fac Med, E-28040 Madrid, Spain.
RP Bunsow, E (通讯作者)，Hosp Gen Univ Gregorio Maranon, Serv Microbiol & Enfermedades Infecciosas, Doctor Esquerdo 46, Madrid 28007, Spain.
EM eleonorabunsow@hotmail.com
RI Roa, Paula Lopez/D-5041-2016; Bouza, Emilio/D-8661-2014; Garcia de
   Viedma, Dario/D-6914-2018
OI Roa, Paula Lopez/0000-0002-7989-4275; Bouza, Emilio/0000-0001-6967-9267;
   Kestler, Martha/0000-0003-3307-1545; Garcia de Viedma,
   Dario/0000-0003-3647-7110
FU Instituto de Salud Carlos III- FIS [CM11/00142]
FX P. Lopez Roa has a Rio Hortega contract (CM11/00142) from the Instituto
   de Salud Carlos III- FIS.
CR Ahmad S, 2009, RESP MED, V103, P1777, DOI 10.1016/j.rmed.2009.07.010
   Alcaide F, 2011, ENFERM INFEC MICR CL, V29, P34, DOI 10.1016/S0213-005X(11)70016-7
   Alonso M, 2011, J CLIN MICROBIOL, V49, P2688, DOI 10.1128/JCM.00659-11
   [Anonymous], 2011, M24A2 I CALS CLIN LA
   Armand S, 2011, J CLIN MICROBIOL, V49, P1772, DOI 10.1128/JCM.02157-10
   Blakemore R, 2010, J CLIN MICROBIOL, V48, P2495, DOI 10.1128/JCM.00128-10
   Boehme CC, 2011, LANCET, V377, P1495, DOI 10.1016/S0140-6736(11)60438-8
   Boehme CC, 2010, NEW ENGL J MED, V363, P1005, DOI 10.1056/NEJMoa0907847
   Brodie D, 2005, CLIN CHEST MED, V26, P247, DOI 10.1016/j.ccm.2005.02.012
   Causse M, 2011, J CLIN MICROBIOL, V49, P3065, DOI 10.1128/JCM.00491-11
   Centers for Disease Control and Prevention (CDC), 2006, MMWR Morb Mortal Wkly Rep, V55, P301
   Deggim V, 2013, J CLIN MICROBIOL, V51, P2396, DOI 10.1128/JCM.00151-13
   Espinal MA, 2003, TUBERCULOSIS, V83, P44, DOI 10.1016/S1472-9792(02)00058-6
   Hanif SNM, 2011, INT J TUBERC LUNG D, V15, P1274, DOI 10.5588/ijtld.11.0394
   Helb D, 2010, J CLIN MICROBIOL, V48, P229, DOI 10.1128/JCM.01463-09
   Hillemann D, 2011, J CLIN MICROBIOL, V49, P1202, DOI 10.1128/JCM.02268-10
   Ioannidis P, 2011, J CLIN MICROBIOL, V49, P3068, DOI 10.1128/JCM.00718-11
   KUBICA GP, 1963, AM REV RESPIR DIS, V87, P775
   Lawn SD, 2012, EXPERT REV ANTI-INFE, V10, P631, DOI [10.1586/ERI.12.43, 10.1586/eri.12.43]
   Marlowe EM, 2011, J CLIN MICROBIOL, V49, P1621, DOI 10.1128/JCM.02214-10
   Moure R, 2011, J CLIN MICROBIOL, V49, P1137, DOI 10.1128/JCM.01831-10
   Murphy Amy, 2009, TRADITIONAL DWELLING, V21, P7
   Steingart KR, 2014, COCHRANE DB SYST REV, DOI [10.1002/14651858.CD009593.pub3, 10.1002/14651858.CD009593.pub2]
   Tortoli E, 2012, EUR RESPIR J, V40, P442, DOI 10.1183/09031936.00176311
   Vadwai V, 2011, J CLIN MICROBIOL, V49, P2540, DOI 10.1128/JCM.02319-10
   WHO, 2008, 4 WHO
   Zeka AN, 2011, J CLIN MICROBIOL, V49, P4138, DOI 10.1128/JCM.05434-11
NR 27
TC 32
Z9 35
U1 0
U2 16
PU W B SAUNDERS CO LTD
PI LONDON
PA 32 JAMESTOWN RD, LONDON NW1 7BY, ENGLAND
SN 0163-4453
EI 1532-2742
J9 J INFECTION
JI J. Infect.
PD APR
PY 2014
VL 68
IS 4
BP 338
EP 343
DI 10.1016/j.jinf.2013.11.012
PG 6
WC Infectious Diseases
WE Science Citation Index Expanded (SCI-EXPANDED)
SC Infectious Diseases
GA AC8FV
UT WOS:000332769800005
PM 24296493
DA 2022-08-20
ER

PT J
AU To, KW
   Kam, KM
   Chan, DPC
   Yip, WH
   Chan, KP
   Lo, R
   Ng, S
   Ngai, J
   Lee, SS
AF To, Kin Wang
   Kam, Kai Man
   Chan, Denise Pui Chung
   Yip, Wing Ho
   Chan, Ka Pang
   Lo, Rachael
   Ng, Susanna
   Ngai, Jenny
   Lee, Shui Shan
TI Utility of GeneXpert in analysis of bronchoalveolar lavage samples from
   patients with suspected tuberculosis in an intermediate-burden setting
SO JOURNAL OF INFECTION
LA English
DT Article
DE Tuberculosis; Intermediate burden; Bronchoalveolar lavage; GeneXpert
ID REAL-TIME PCR; SMEAR-NEGATIVE TUBERCULOSIS; XPERT MTB/RIF ASSAY;
   PULMONARY TUBERCULOSIS; MYCOBACTERIUM-TUBERCULOSIS; DIAGNOSTIC-ACCURACY;
   NONRESPIRATORY SPECIMENS; BRONCHOSCOPY SPECIMENS; COMPUTED-TOMOGRAPHY;
   METAANALYSIS
AB Objectives: To explore the clinical role of GeneXpert in managing pulmonary tuberculosis (TB) in an intermediate burden city.
   Methods: Sputum acid-fast-bacilli (AFB) smear negative patients underwent bronchoscopy for bronchial alveolar lavage (BAL). Fluids collected were examined for AFB smear, TB culture, TB polymerase chain reaction (PCR) (Cobas Taqman) and for GeneXpert.
   Results: From October 2015 to February 2017, 227 BAL samples were collected. Cough and haemoptysis were the presenting symptoms in 70.0% and 37.4%, respectively. Apical shadows on chest X-rays (CXR) and apical cavitations on computed tomography (CT) were commoner in GeneXpert positive cases (p =0.01 and 0.02, respectively). Sensitivity and specificity of GeneXpert for TB diagnosis was 80% and 98% respectively. Positive and negative predictive value of the test was 92.3 and 95.1%, respectively. There were 9 false negative GeneXpert samples (8 were Cobas Taqman TB PCR negative): 6 were diagnosed by BAL culture, 2 by biopsy and one by Cobas Taqman TB PCR. There were 3 false positive cases with negative culture; 2 were put on empirical treatment with favourable clinical responses, while one defaulted follow-p.
   Conclusion: GeneXpert in BAL samples has high sensitivity and specificity. It enabled timely initiation of anti-TB treatment in clinical suspicious cases. (C) 2018 The British Infection Association. Published by Elsevier Ltd. All rights reserved.
C1 [To, Kin Wang; Yip, Wing Ho; Chan, Ka Pang; Lo, Rachael; Ng, Susanna; Ngai, Jenny] Chinese Univ Hong Kong, Prince Wales Hosp, Dept Med & Therapeut, Resp Div, Hong Kong, Hong Kong, Peoples R China.
   [Kam, Kai Man; Chan, Denise Pui Chung; Lee, Shui Shan] Chinese Univ Hong Kong, Prince Wales Hosp, Stanley Ho Ctr Emerging Infect Dis, Hong Kong, Hong Kong, Peoples R China.
RP Lee, SS (通讯作者)，Chinese Univ Hong Kong, Prince Wales Hosp, Stanley Ho Ctr Emerging Infect Dis, Hong Kong, Hong Kong, Peoples R China.
EM sslee@cuhk.edu.hk
RI Lee, Shui Shan/B-9374-2008; Ng, Susanna/ABI-4965-2020
OI Lee, Shui Shan/0000-0003-1448-765X; 
FU Hong Kong Tuberculosis, Chest and Heart Diseases Association
FX The authors would like to thank the Hong Kong Tuberculosis, Chest and
   Heart Diseases Association for funding support, and the Li Ka Shing
   Institute of Health Sciences for providing laboratory, manpower and
   equipment for conducting the study. Special thanks to Keith Wong
   operating the GeneXpert and Dr. Viola Chow for the data on sputum AFB
   smear.
CR Algin O, 2011, DIAGN INTERV RADIOL, V17, P18, DOI 10.4261/1305-3825.DIR.2901-09.1
   [Anonymous], 2017, GLOBAL TUBERCULOSIS
   Armand S, 2011, J CLIN MICROBIOL, V49, P1772, DOI 10.1128/JCM.02157-10
   Atwal SS, 2014, J CLIN DIAGN RES, V8, pRC12, DOI 10.7860/JCDR/2014/9397.4518
   Barnard DA, 2015, BMC PULM MED, V15, DOI 10.1186/s12890-015-0086-z
   Berniker AV, 2016, RADIOL CLIN N AM, V54, P1165, DOI 10.1016/j.rcl.2016.05.009
   Chang K, 2012, J INFECTION, V64, P580, DOI 10.1016/j.jinf.2012.02.012
   Chou PC, 2012, INT J TUBERC LUNG D, V16, P1674, DOI 10.5588/ijtld.11.0672
   Cruciani M, 2004, J CLIN MICROBIOL, V42, P2321, DOI 10.1128/JCM.42.5.2321-2325.2004
   Davis JL, 2013, LANCET INFECT DIS, V13, P147, DOI 10.1016/S1473-3099(12)70232-3
   Feng F, 2013, CHINESE MED J-PEKING, V126, P3228, DOI 10.3760/cma.j.issn.0366-6999.20130733
   Goncalves BD, 2015, INFECT CONT HOSP EP, V36, P204, DOI 10.1017/ice.2014.29
   Hanrahan CF, 2014, AM J RESP CRIT CARE, V189, P1426, DOI 10.1164/rccm.201312-2140OC
   Heo JN, 2005, AM J ROENTGENOL, V184, P639, DOI 10.2214/ajr.184.2.01840639
   Jafari C, 2013, INT J TUBERC LUNG D, V17, P1459, DOI 10.5588/ijtld.13.0108
   Ko Y, 2016, INT J TUBERC LUNG D, V20, P115, DOI 10.5588/ijtld.15.0227
   Lee HY, 2013, INT J TUBERC LUNG D, V17, P917, DOI 10.5588/ijtld.12.0885
   Lee JJ, 2008, EUR J RADIOL, V67, P100, DOI 10.1016/j.ejrad.2007.07.009
   Lin ZQ, 2015, ACTA RADIOL, V56, P552, DOI 10.1177/0284185114535209
   Miller MB, 2011, J CLIN MICROBIOL, V49, P3458, DOI 10.1128/JCM.05212-11
   Miller WT, 2011, J COMPUT ASSIST TOMO, V35, P524, DOI 10.1097/RCT.0b013e31821d6cd3
   Rachow A, 2011, PLOS ONE, V6, DOI 10.1371/journal.pone.0020458
   Restrepo CS, 2016, RADIOL CLIN N AM, V54, P453, DOI 10.1016/j.rcl.2015.12.007
   Steingart KR, 2007, EXPERT REV ANTI-INFE, V5, P327, DOI 10.1586/14787210.5.3.327
   Steingart KR, 2014, COCHRANE DB SYST REV, DOI [10.1002/14651858.CD009593.pub3, 10.1002/14651858.CD009593.pub2]
   Teo J, 2011, J CLIN MICROBIOL, V49, P3659, DOI 10.1128/JCM.00211-11
   Theron G, 2014, SCI REP-UK, V4, DOI 10.1038/srep05658
   World Health Organization, TUB COUNTR PROF HONG
   World Health Organization, TUB COUNTR PROF KOR
   World Health Organization, 2013, AUT REALT NUCL AC AM
NR 30
TC 9
Z9 11
U1 1
U2 8
PU W B SAUNDERS CO LTD
PI LONDON
PA 32 JAMESTOWN RD, LONDON NW1 7BY, ENGLAND
SN 0163-4453
EI 1532-2742
J9 J INFECTION
JI J. Infect.
PD OCT
PY 2018
VL 77
IS 4
BP 296
EP 301
DI 10.1016/j.jinf.2018.06.011
PG 6
WC Infectious Diseases
WE Science Citation Index Expanded (SCI-EXPANDED)
SC Infectious Diseases
GA GT9SU
UT WOS:000444886500005
PM 29964143
DA 2022-08-20
ER

PT J
AU Garg, P
   Goyal, A
   Yagnik, VD
   Dawka, S
   Menon, GR
AF Garg, Pankaj
   Goyal, Ankita
   Yagnik, Vipul D.
   Dawka, Sushil
   Menon, Geetha R.
TI Diagnosis of anorectal tuberculosis by polymerase chain reaction,
   GeneXpert and histopathology in 1336 samples in 776 anal fistula
   patients
SO WORLD JOURNAL OF GASTROINTESTINAL SURGERY
LA English
DT Article
DE Anal fistula; Fistula-in-ano; Tuberculosis; Histopathology; Polymerase
   chain-reaction; GeneXpert
ID IN-ANO; MYCOBACTERIUM-TUBERCULOSIS; CLINICAL-FEATURES; EXTRAPULMONARY
AB BACKGROUND
   The association of tuberculosis (TB) with anal fistulas can make its treatment quite difficult. The main challenge is timely detection of TB in anal fistulas and its proper management. There is little data available on diagnosis and management of TB in anal fistulas.
   AIM
   To detect TB in fistula-in-ano patients were analyzed in different methods utilized.
   METHODS
   A retrospective analysis of different methods, polymerase chain-reaction (PCR), GeneXpert and histopathology (HPE), utilized to detect tuberculosis in fistula-in-ano patients, treated between 2014-2020, was performed. The sampling was done for tissue (fistula tract lining) and pus (when available). The detection rate of various tests to detect TB and prevalence rate of TB in simple vs complex fistulae were studied.
   RESULTS
   In 1336 samples (776 patients) tested, TB was detected in 133 samples (122 patients). TB was detected in 52/703 (7.4%) samples tested by PCR-tissue, in 77/331 (23.2%) samples tested by PCR-pus, 3/197 (1.5%) samples tested with HPE-tissue and 1/105 (0.9%) samples tested by GeneXpert. To detect TB, PCR-tissue was significantly better than HPE-tissue (52/703 vs 3/197 respectively) (P = 0.0012, significant, Fisher's exact test) and PCR-pus was significantly better than PCR-tissue (77/331 vs 52/703 respectively) (P < 0.00001, significant, Fisher's exact test). TB fistulas were more complex than non-tuberculous fistulas [78/113 (69%) vs 278/727 (44.3%) respectively] (P < 0.00001, significant, Fisher's exact test) but the overall healing rate was similar in tuberculous and non-tuberculous fistula groups [90/102 (88.2%) vs 518/556 (93.2%) respectively] (P = 0.10, not significant, Fisher's exact test).
   CONCLUSION
   This is the largest study of anorectal TB to be published. The detection of TB by polymerase chain-reaction was significantly higher than by histopathology and GeneXpert. Amongst polymerase chain-reaction, pus had a higher detection rate than tissue. TB fistulas were more complex than non-tuberculous fistulas but aggressive diagnosis and meticulous treatment led to comparable overall success rates in both groups.
C1 [Garg, Pankaj] Indus Int Hosp, Dept Colorectal Surg, Near Dera Bassi, Mohali 140507, Punjab, India.
   [Garg, Pankaj] Garg Fistula Res Inst, Dept Colorectal Surg, Panchkula 134113, Haryana, India.
   [Goyal, Ankita] Gian Sagar Med Coll & Hosp, Dept Pathol, Patiala 140506, Punjab, India.
   [Yagnik, Vipul D.] Nishtha Surg Hosp & Res Ctr, Dept Surg, Patan 384265, Gujarat, India.
   [Dawka, Sushil] SSR Med Coll, Dept Surg, Belle Rive, Mauritius.
   [Menon, Geetha R.] Indian Council Med Res, Dept Stat, New Delhi 110029, India.
RP Garg, P (通讯作者)，Indus Int Hosp, Dept Colorectal Surg, Near Dera Bassi, Mohali 140507, Punjab, India.
EM drgargpankaj@yahoo.com
RI Yagnik, Vipul D./J-9991-2019; Menon, Geetha R/AAQ-7062-2020
OI Yagnik, Vipul D./0000-0003-4008-6040; GARG, PANKAJ/0000-0002-0800-3578
CR ADDISON NV, 1983, ANN ROY COLL SURG, V65, P105
   Bokhari I, 2008, JCPSP-J COLL PHYSICI, V18, P401, DOI 06.2008/JCPSP.401403
   Corrêa Neto Isaac José Felippe, 2014, J. Coloproctol. (Rio J.), V34, P124, DOI 10.1016/j.jcol.2014.03.002
   Garg P, 2020, ANN MED SURG, V59, P122, DOI 10.1016/j.amsu.2020.09.022
   Garg P, 2019, DIS COLON RECTUM, V62, P1390, DOI 10.1097/DCR.0000000000001493
   Garg P, 2017, INT J COLORECTAL DIS, V32, P1033, DOI 10.1007/s00384-017-2783-y
   Garg P, 2016, INT J MYCOBACT, V5, P276, DOI 10.1016/j.ijmyco.2016.05.001
   Hassani KI, 2012, CASE REP INFECT DIS, V2012, DOI 10.1155/2012/852763
   Kraemer M, 2000, DIS COLON RECTUM, V43, P1589, DOI 10.1007/BF02236745
   Lawn SD, 2012, EXPERT REV ANTI-INFE, V10, P631, DOI [10.1586/ERI.12.43, 10.1586/eri.12.43]
   Mathew Soniya, 2008, Int J Surg, V6, pe36, DOI 10.1016/j.ijsu.2006.11.005
   Maynard-Smith L, 2014, BMC INFECT DIS, V14, DOI 10.1186/s12879-014-0709-7
   Morris Y, 2000, RADIOGRAPHICS, V20, P623, DOI 10.1148/radiographics.20.3.g00mc15623
   Moujahid M, 2010, GASTROEN CLIN BIOL, V34, P98, DOI 10.1016/j.gcb.2009.10.018
   Park DY, 2003, ARCH PATHOL LAB MED, V127, P326
   Sachdeva K, 2018, INDIAN J OTOLARYNGOL, V70, P572, DOI 10.1007/s12070-018-1364-x
   Sahu Manoranjan, 2017, J. Coloproctol. (Rio J.), V37, P211, DOI 10.1016/j.jcol.2017.04.005
   Shan YS, 2002, DIS COLON RECTUM, V45, P1685, DOI 10.1007/s10350-004-7260-3
   Shrestha NK, 2003, J CLIN MICROBIOL, V41, P5121, DOI 10.1128/JCM.41.11.5121-5126.2003
   SHUKLA HS, 1988, BRIT J SURG, V75, P38, DOI 10.1002/bjs.1800750114
   Song H, 2009, AM J DERMATOPATH, V31, P227, DOI 10.1097/DAD.0b013e318196187a
   Stupart D, 2009, S AFR J SURG, V47, P116
   Sultan S, 2002, DIS COLON RECTUM, V45, P407, DOI 10.1007/s10350-004-6191-3
   Tai WC, 2010, COLORECTAL DIS, V12, pE114, DOI 10.1111/j.1463-1318.2009.02057.x
   Wijekoon NS, 2010, COLORECTAL DIS, V12, P94, DOI 10.1111/j.1463-1318.2008.01698.x
NR 25
TC 5
Z9 5
U1 0
U2 1
PU BAISHIDENG PUBLISHING GROUP INC
PI PLEASANTON
PA 7041 Koll Center Parkway, Suite 160, PLEASANTON, CA, UNITED STATES
SN 1948-9366
J9 WORLD J GASTRO SURG
JI World J. Gastrointest. Surg.
PD APR 27
PY 2021
VL 13
IS 4
BP 355
EP 365
DI 10.4240/wjgs.v13.i4.355
PG 11
WC Gastroenterology & Hepatology; Surgery
WE Science Citation Index Expanded (SCI-EXPANDED)
SC Gastroenterology & Hepatology; Surgery
GA RU1WJ
UT WOS:000644940800003
PM 33968302
OA Green Published, gold
DA 2022-08-20
ER

PT J
AU Tang, PJ
   Xu, P
   Shu, W
   Wang, XF
   Guo, J
   Song, HF
   Li, SM
   Pang, Y
   Wu, MY
AF Tang, Peijun
   Xu, Ping
   Shu, Wei
   Wang, Xiafang
   Guo, Jian
   Song, Huafeng
   Li, Sumei
   Pang, Yu
   Wu, Meiying
TI Additional benefits of GeneXpert MTB/RIF assay for the detection of
   pulmonary tuberculosis patients with prior exposure to fluoroquinolones
SO INFECTION AND DRUG RESISTANCE
LA English
DT Article
DE tuberculosis; fluoroquinolone exposure; GeneXpert
ID DRUG-RESISTANT TUBERCULOSIS; EARLY BACTERICIDAL ACTIVITY;
   NATIONAL-SURVEY; MOXIFLOXACIN; LEVOFLOXACIN; MICROSCOPY; CHINA;
   CIPROFLOXACIN; PREVALENCE; BURDEN
AB Background: We performed a prospective study to investigate the association between pre-diagnosis exposure to fluoroquinolone (FQ) and laboratory testing results among tuberculosis (TB) patients.
   Patients and methods: Each TB-suspected patient provided sputum specimen for mycobacteria growth indicator tube (MGIT) culture and GeneXpert among pulmonary TB patients. Confirmed TB patients and clinically diagnosed TB patients were further enrolled in the final analysis.
   Results : A total of 661 TB patients were included in the final analysis. The distribution of rural TB patients in the FQ-exposed group was significantly higher than that of urban TB patients (P=0.02). GeneXpert showed significantly better positive rate than MGIT technology for TB cases with prior FQ exposure (30.6% for GeneXpert vs 20.1% for MGIT, P=0.01). The positive rate of GeneXpert was significantly higher than that of MGIT for 7-13 days (P=0.04) and >= 14 days FQ exposure (P=0.01) groups, respectively. We also found that the positive rate of MGIT was significantly decreased from 31.5% for <7 days levofloxacin (LFX) exposure group to 9.4% for >= 14 days LFX exposure group (P=0.01), whereas the positive rate of MGIT displayed significant decrease after 7-13 days exposure to moxifloxacin (P=0.04).
   Conclusion: In conclusion, our data demonstrate that TB patients prior to sputum collection are prone to yield negative culture results. GeneXpert could bring additional benefits for the detection of pulmonary TB patients with prior exposure to FQs. In addition, the exposure to moxifloxacin affected mycobacterial culture at an earlier stage compared with LFX.
C1 [Tang, Peijun; Xu, Ping; Wang, Xiafang; Guo, Jian; Song, Huafeng; Li, Sumei; Wu, Meiying] Fifth Peoples Hosp Suzhou, Dept TB, Suzhou, Peoples R China.
   [Shu, Wei; Pang, Yu] Capital Med Univ, Beijing Chest Hosp, Beijing TB & Thorac Tumor Inst, Natl Clin Lab TB, Beijing, Peoples R China.
RP Pang, Y (通讯作者)，Capital Med Univ, Beijing Chest Hosp, Beijing TB & Thorac Tumor Inst, 97 Machang, Beijing 101149, Peoples R China.; Wu, MY (通讯作者)，Fifth Peoples Hosp Suzhou, 10 Changqian Rd, Suzhou 215100, Peoples R China.
EM pangyupound@163.com; wu_my@126.com
FU Jiangsu Youth Medical Talents Project [QNRC2016226]; Suzhou Municipal
   Science and Technology Bureau Science and Technology Project for
   People's Livelihood [SS201541, SS201656]; Suzhou City Key Clinical
   Disease Diagnosis and Treatment Technology Special Project [LCZX201514];
   Yangfan Foundation of Innovation Alliance on Tuberculosis Diagnosis and
   Treatment (Beijing); China Tuberculosis Clinical Trial Consortium
   [2018KYJJ007]
FX This study was supported by the Jiangsu Youth Medical Talents Project
   (QNRC2016226), Suzhou Municipal Science and Technology Bureau Science
   and Technology Project for People's Livelihood (SS201541 and SS201656),
   Suzhou City Key Clinical Disease Diagnosis and Treatment Technology
   Special Project (LCZX201514), Yangfan Foundation of Innovation Alliance
   on Tuberculosis Diagnosis and Treatment (Beijing) and China Tuberculosis
   Clinical Trial Consortium (2018KYJJ007). We would like to thank staff in
   the Fifth People's Hospital of Suzhou for their assistance in
   implementing this work.
CR Ahmad Z, 2013, AM J RESP CRIT CARE, V188, P97, DOI 10.1164/rccm.201212-2328OC
   Akkerman OW, 2013, J CLIN MICROBIOL, V51, P3505, DOI 10.1128/JCM.00843-13
   Avalos E, 2015, PLOS ONE, V10, DOI 10.1371/journal.pone.0120470
   Chakravorty S, 2017, MBIO, V8, DOI [10.1128/mBio.00812-17, 10.1128/mbio.00812-17]
   Chang KC, 2010, EUR RESPIR J, V35, P606, DOI 10.1183/09031936.00104209
   Firsov AA, 2003, ANTIMICROB AGENTS CH, V47, P1604, DOI 10.1128/AAC.47.5.1604-1613.2003
   Jeon CY, 2011, INT J TUBERC LUNG D, V15, P77
   Johnson JL, 2006, INT J TUBERC LUNG D, V10, P605
   Lee JY, 2016, ANTIMICROB AGENTS CH, V60, P4005, DOI 10.1128/AAC.01749-15
   Li J, 2017, J THORAC DIS, V9, pE525, DOI 10.21037/jtd.2017.03.185
   Li Y, 2013, BMC MED, V11, DOI 10.1186/1741-7015-11-156
   Long R, 2009, CLIN INFECT DIS, V48, P1354, DOI 10.1086/598196
   Ma JD, 2016, INT J EQUITY HEALTH, V15, DOI 10.1186/s12939-016-0361-5
   Matteelli A, 2014, CLIN EPIDEMIOL, V6, P111, DOI 10.2147/CLEP.S35839
   Michot JM, 2005, ANTIMICROB AGENTS CH, V49, P2429, DOI 10.1128/AAC.49.6.2429-2437.2005
   Pang Y, 2016, EUR RESPIR J, V47, P1584, DOI 10.1183/13993003.01854-2015
   Ramarokoto H, 2002, INT J TUBERC LUNG D, V6, P909
   Sirgel FA, 1997, AM J RESP CRIT CARE, V156, P901, DOI 10.1164/ajrccm.156.3.9611066
   Sylvia S, 2017, PLOS MED, V14, DOI 10.1371/journal.pmed.1002405
   Tan YJ, 2017, SCI REP-UK, V7, DOI 10.1038/s41598-017-03473-7
   Wang JY, 2010, INT J TUBERC LUNG D, V14, P65
   Wang LX, 2014, LANCET, V383, P2057, DOI 10.1016/S0140-6736(13)62639-2
   WHO, 2013, DEF REP FRAM TUB 201
   WHO, 2017, TUB REP
   World Health Organization (WHO), 2015, WHOHTMTB201513
   Xia H, 2013, INT J TUBERC LUNG D, V17, P107, DOI 10.5588/ijtld.12.0184
   Yoshimatsu T, 2002, ANTIMICROB AGENTS CH, V46, P1875, DOI 10.1128/AAC.46.6.1875-1879.2002
   Zhang ZJ, 2014, J CLIN MICROBIOL, V52, P638, DOI 10.1128/JCM.02713-13
   Zhang ZJ, 2014, ANTIMICROB AGENTS CH, V58, P364, DOI 10.1128/AAC.01228-13
   Zhao FZ, 1997, INT J TUBERC LUNG D, V1, P570
   Zhao YL, 2012, NEW ENGL J MED, V366, P2161, DOI 10.1056/NEJMoa1108789
NR 31
TC 7
Z9 8
U1 0
U2 6
PU DOVE MEDICAL PRESS LTD
PI ALBANY
PA PO BOX 300-008, ALBANY, AUCKLAND 0752, NEW ZEALAND
SN 1178-6973
J9 INFECT DRUG RESIST
JI Infect. Drug Resistance
PY 2019
VL 12
BP 87
EP 93
DI 10.2147/IDR.S181259
PG 7
WC Infectious Diseases; Pharmacology & Pharmacy
WE Science Citation Index Expanded (SCI-EXPANDED)
SC Infectious Diseases; Pharmacology & Pharmacy
GA HF8FD
UT WOS:000454475500001
PM 30643436
OA Green Published, gold, Green Submitted
DA 2022-08-20
ER

PT J
AU Sarin, S
   Huddart, S
   Raizada, N
   Parija, D
   Kalra, A
   Rao, R
   Salhotra, VS
   Khaparde, SD
   Boehme, C
   Denkinger, CM
   Sohn, H
AF Sarin, Sanjay
   Huddart, Sophie
   Raizada, Neeraj
   Parija, Debadutta
   Kalra, Aakshi
   Rao, Raghuram
   Salhotra, Virender Singh
   Khaparde, Sunil D.
   Boehme, Catharina
   Denkinger, Claudia M.
   Sohn, Hojoon
TI Cost and operational impact of promoting upfront GeneXpert MTB/RIF test
   referrals for presumptive pediatric tuberculosis patients in India
SO PLOS ONE
LA English
DT Article
AB Background
   Outreach and promotion programs are essential to ensuring uptake of new public health interventions and guidelines. We assessed the costs and operation dynamics of outreach and promotion efforts for up front Xpert MTB/RIF (Xpert) testing for pediatric presumptive tuberculosis (TB) patients in four major Indian cities.
   Methods
   Xpert test costs were assessed as weighted average per-test costs based on the daily workload dynamics matched by test volume specific Xpert unit cost at each study site. Costs of outreach programs to recruit health providers to refer pediatric patients for Xpert testing were assessed as cost per referral for each quarter based on total program costs and referral data. All costs were assessed in the health service provider's perspective and expressed in 2015 USD.
   Results
   Weighted average per-test costs ranged from $14.71 to $17.81 at the four laboratories assessed. Differences between laboratories were associated with unused testing capacity and/or frequencies of overtime work to cope with increasing demand and same-day testing requirements. Outreach activities generated between 825 and 2,065 Xpert testing referrals on average each quarter across the four study sites, translating into $0.63 to $2.55 per patient referred. Overall outreach costs per referral decreased with time, stabilizing at an average cost of $1.10, and demonstrated a clear association with increased referrals.
   Conclusions
   Xpert test and outreach program costs within and across study sites were mainly driven by the dynamics of Xpert testing demand resulting from the combined outreach activities. However, these increases in demand required considerable overtime work resulting in additional costs and operational challenges at the study laboratories. Therefore, careful laboratory operational adjustment should be evaluated at target areas in parallel to the anticipated demand from the Xpert referral outreach program scale-up in other Indian regions.
C1 [Sarin, Sanjay; Raizada, Neeraj; Parija, Debadutta; Kalra, Aakshi] Fdn Innovat New Diagnost, New Delhi, India.
   [Huddart, Sophie] McGill Univ, Dept Epidemiol Biostat & Occupat Hlth, Montreal, PQ, Canada.
   [Huddart, Sophie] McGill Int TB Ctr, Montreal, PQ, Canada.
   [Rao, Raghuram; Salhotra, Virender Singh; Khaparde, Sunil D.] Govt India, Cent TB Div, New Delhi, India.
   [Boehme, Catharina; Denkinger, Claudia M.] Fdn Innovat New Diagnost, Geneva, Switzerland.
   [Sohn, Hojoon] Johns Hopkins Bloomberg Sch Publ Hlth, Baltimore, MD 21205 USA.
RP Sohn, H (通讯作者)，Johns Hopkins Bloomberg Sch Publ Hlth, Baltimore, MD 21205 USA.
EM hsohn6@jhu.edu
RI Sohn, Hojoon/AAL-2856-2020; Huddart, Sophie/AAF-8844-2020
OI Sohn, Hojoon/0000-0001-5837-3844; Huddart, Sophie/0000-0001-6425-3371;
   Raizada, Neeraj/0000-0003-2116-332X
FU United States Agency for International Development (USAID) under the
   Challenge TB project
FX The FIND/RNTCP pediatric GeneXpert implementation project was funded by
   United States Agency for International Development (USAID) under the
   Challenge TB project. FIND was responsible for the implementation,
   training, coordination, monitoring, data analysis and writing of the
   report in close coordination with the Central TB Division, Ministry of
   Health and Family Welfare, Government of India.
CR Bratt JH, 1999, HEALTH POLICY PLANN, V14, P374, DOI 10.1093/heapol/14.4.374
   Central TB Division, 2017, DRAFT NAT STRAT PLAN
   Cunnama L, 2016, HEALTH ECON, V25, P53, DOI 10.1002/hec.3295
   IPAQT, IN PROM AFF QUAL TB
   Kumaranayake L, 2000, HEALTH POLICY PLANN, V15, P230, DOI 10.1093/heapol/15.2.230
   Raizada N, 2018, PLOS ONE, V13, DOI 10.1371/journal.pone.0193194
   Rupert S, 2016, BOTTOM UP TOP DOWN U, V21, P375
   Tan-TorresEdejer T., 2003, MAKING CHOICES HLTH
   Vassall A, 2011, PLOS MED, V8, DOI 10.1371/journal.pmed.1001120
   WHO, 2017, GLOB TUB REP
   Zelman WN, 2009, FINANCIAL MANAGEMENT
NR 11
TC 8
Z9 8
U1 1
U2 1
PU PUBLIC LIBRARY SCIENCE
PI SAN FRANCISCO
PA 1160 BATTERY STREET, STE 100, SAN FRANCISCO, CA 94111 USA
SN 1932-6203
J9 PLOS ONE
JI PLoS One
PD APR 1
PY 2019
VL 14
IS 4
AR e0214675
DI 10.1371/journal.pone.0214675
PG 12
WC Multidisciplinary Sciences
WE Science Citation Index Expanded (SCI-EXPANDED); Social Science Citation Index (SSCI)
SC Science & Technology - Other Topics
GA HR1CY
UT WOS:000462867000035
PM 30933997
OA Green Published, Green Submitted, gold
DA 2022-08-20
ER

PT J
AU Okware, S
   Castelnuovo, B
   Parkes-Ratanshi, R
   Sempa, J
AF Okware, S.
   Castelnuovo, B.
   Parkes-Ratanshi, R.
   Sempa, J.
TI Outcomes in HIV-infected patients diagnosed with pulmonary tuberculosis
   by smear and GeneXpert: Experience in a limited-resource setting
SO HIV MEDICINE
LA English
DT Meeting Abstract
C1 [Okware, S.; Castelnuovo, B.; Parkes-Ratanshi, R.; Sempa, J.] Infect Dis Inst, Kampala, Uganda.
RI Parkes-Ratanshi, Rosalind/AAR-5409-2020
OI Parkes-Ratanshi, Rosalind/0000-0001-9297-1311
NR 0
TC 0
Z9 0
U1 0
U2 2
PU WILEY-BLACKWELL
PI HOBOKEN
PA 111 RIVER ST, HOBOKEN 07030-5774, NJ USA
SN 1464-2662
EI 1468-1293
J9 HIV MED
JI HIV Med.
PD APR
PY 2014
VL 15
SU 3
SI SI
BP 143
EP 144
PG 2
WC Infectious Diseases
WE Science Citation Index Expanded (SCI-EXPANDED)
SC Infectious Diseases
GA AE0KB
UT WOS:000333652300441
DA 2022-08-20
ER

PT J
AU Lem, LK
   Ong, CK
   Ali, I
AF Lem, Li Khen
   Ong, Choo Khoon
   Ali, Irfhan
TI ROLE OF GENEXPERT MTB/RIF FOR DIAGNOSIS OF TUBERCULOSIS AND DETECTION OF
   RIFAMPICIN RESISTANCE IN PULMONARY AND EXTRAPULMONARY SPECIMENS
SO RESPIROLOGY
LA English
DT Meeting Abstract
CT Asian Pacific Society of Respirology 20th Congress
CY DEC 03-06, 2015
CL Kuala Lumpur, MALAYSIA
NR 0
TC 0
Z9 0
U1 0
U2 0
PU WILEY-BLACKWELL
PI HOBOKEN
PA 111 RIVER ST, HOBOKEN 07030-5774, NJ USA
SN 1323-7799
EI 1440-1843
J9 RESPIROLOGY
JI Respirology
PD DEC
PY 2015
VL 20
SU 3
SI SI
MA 733
BP 156
EP 156
PG 1
WC Respiratory System
WE Science Citation Index Expanded (SCI-EXPANDED); Conference Proceedings Citation Index - Science (CPCI-S)
SC Respiratory System
GA CX8KN
UT WOS:000365952400563
DA 2022-08-20
ER

PT J
AU Tadesse, M
   Abebe, G
   Abdissa, K
   Aragaw, D
   Abdella, K
   Bekele, A
   Bezabih, M
   Apers, L
   de Jong, BC
   Rigouts, L
AF Tadesse, Mulualem
   Abebe, Gemeda
   Abdissa, Ketema
   Aragaw, Dossegnaw
   Abdella, Kedir
   Bekele, Alemayehu
   Bezabih, Mesele
   Apers, Ludwig
   de Jong, Bouke C.
   Rigouts, Leen
TI GeneXpert MTB/RIF Assay for the Diagnosis of Tuberculous Lymphadenitis
   on Concentrated Fine Needle Aspirates in High Tuberculosis Burden
   Settings
SO PLOS ONE
LA English
DT Article
ID MYCOBACTERIUM-TUBERCULOSIS; RIFAMPIN RESISTANCE; XPERT MTB/RIF;
   SPECIMENS; CYTOLOGY; ETHIOPIA; BIOPSY
AB Introduction
   The diagnosis of tuberculous lymphadenitis (TBL) remains challenging. The routinely used methods (cytology and smear microscopy) have sub-optimal sensitivity. Recently, WHO recommends GeneXpert to be used as the initial diagnostic test in patients suspected of having extra-pulmonary tuberculosis (EPTB). However, this was a conditional recommendation due to very low-quality evidence available and more studies are needed. In this study we evaluated the performance of Xpert for the diagnosis of TBL on concentrated fine needle aspirates (FNA) in Southwest Ethiopia.
   Methods
   FNA was collected from presumptive TBL cases. Two smears were prepared from each aspirate and processed for cytology and conventional microscopy. The remaining aspirate was treated with N-acetyl-L-cysteine-NaOH and centrifuged for 15minutes at 3000g. The concentrated sediment was used for culture and Xpert test. Capilia TB-Neo test was used to differentiate M. tuberculosis complex (MTBC) from non-tuberculous mycobacteria (NTM). Composite bacteriological methods (culture and/or smear microscopy) were considered as a reference standard.
   Result
   Out of 143 enrolled suspects, 64.3% (92/143) were confirmed TBL cases by the composite reference standard (CRS). Xpert detected M. tuberculosis complex (MTBC) in 60.1% (86/143) of the presumptive TBL cases. The sensitivity of Xpert compared to CRS was 87.8% [95% CI: 81.0-94.5] and specificity 91.1% [95% CI: 82.8-99.4]. The sensitivity was 27.8% for smear microscopy and 80% for cytology compared to CRS. Cytology showed the lowest specificity (57.8%). Xpert was positive in 4 out of 45 culture- and smear-negative cases. Among 47 cytomorphologically non-TBL cases, 15 were positive on Xpert. More than half of Xpert-positive cases were in the range of very low cut-off threshold values (28<Ct<38). Resistance to rifampicin was identified in 4.7% (4/86) of Xpert-positive cases.
   Conclusion
   Xpert test showed a high sensitivity and specificity for the diagnosis of TBL on concentrated FNA samples. In addition, Xpert offered rapid detection of rifampicin-resistant M. tuberculosis strains from lymph node aspirates.
C1 [Tadesse, Mulualem; Abebe, Gemeda; Abdissa, Ketema; Aragaw, Dossegnaw; Abdella, Kedir; Bekele, Alemayehu; Bezabih, Mesele] Jimma Univ, Dept Med Lab Sci & Pathol, Jimma, Ethiopia.
   [Tadesse, Mulualem; Abebe, Gemeda; Aragaw, Dossegnaw; Abdella, Kedir] Jimma Univ, Biotechnol Res Inst, Mycobacteriol Res Ctr, Jimma, Ethiopia.
   [Apers, Ludwig] Inst Trop Med, Dept Clin Sci, B-2000 Antwerp, Belgium.
   [de Jong, Bouke C.; Rigouts, Leen] Inst Trop Med, Dept Microbiol, Mycobacteriol Unit, B-2000 Antwerp, Belgium.
   [Tadesse, Mulualem; Rigouts, Leen] Univ Antwerp, Dept Biomed Sci, B-2020 Antwerp, Belgium.
RP Abebe, G (通讯作者)，Jimma Univ, Dept Med Lab Sci & Pathol, Jimma, Ethiopia.
EM gemeda.abebe@ju.edu.et
RI de Jong, Bouke/A-3636-2013; Abebe, Gemeda/AAB-8789-2019
OI de Jong, Bouke/0000-0002-1017-4675; Abebe, Gemeda/0000-0002-7172-9136;
   Abdulsemed, Kedir Abdella/0000-0002-1480-219X
FU Jimma University; Flemish Universities (VLIR-OUS project)
FX Funding for this work was secured from interuniversity cooperation
   between Jimma University and Flemish Universities (VLIR-OUS project).
   The funders had no role in study design, data collection and analysis,
   decision to publish, or preparation of the manuscript.
CR Al-Ateah SM, 2012, SAUDI MED J, V33, P1100
   Ammari FF, 2003, OTOLARYNG HEAD NECK, V128, P576, DOI 10.1016/S0194-5998(03)00121-9
   Annam V, 2009, INDIAN J PATHOL MICR, V52, P349, DOI 10.4103/0377-4929.54991
   [Anonymous], 2013, GLOB TUB CONTR
   Biadglegne F, 2014, TUBERCULOSIS
   Biadglegne F, 2013, JPN J INFECT DIS, V66, P263, DOI 10.7883/yoken.66.263
   Blakemore R, 2011, AM J RESP CRIT CARE, V184, P1076, DOI 10.1164/rccm.201103-0536OC
   Boehme CC, 2010, NEW ENGL J MED, V363, P1005, DOI 10.1056/NEJMoa0907847
   Boeree M, 2014, MALAWI MED J, V11, P56
   Das DK, 2000, LAB MED, V31, P625, DOI 10.1309/UJ0B-VDWV-U0LE-E0QQ
   Denkinger C. M, 2014, EUROPEAN RESP J
   GUPTA AK, 1992, ACTA CYTOL, V36, P391
   Helb D, 2010, J CLIN MICROBIOL, V48, P229, DOI 10.1128/JCM.01463-09
   Hillemann D, 2011, J CLIN MICROBIOL, V49, P1202, DOI 10.1128/JCM.02268-10
   Kidane D, 2002, J CLIN MICROBIOL, V40, P4230, DOI 10.1128/JCM.40.11.4230-4234.2002
   Kurabachew M, 2004, DIAGN MICR INFEC DIS, V49, P99, DOI 10.1016/j.diagmicrobio.2004.03.010
   Ligthelm LJ, 2011, J CLIN MICROBIOL, V49, P3967, DOI 10.1128/JCM.01310-11
   Mistry Y, 2012, NJMR, V2, P77
   Normung DIf, 1995, MED MICR DIAGN TU 32
   Penz E, 2015, INT J TUBERC LUNG D, V19, P278, DOI 10.5588/ijtld.14.0262
   Prevention CfDCa, 2003, AFB MICR CHAR STRAT
   WHO Guidelines Approved by the Guidelines Review Committee, 2014, XPERT MTB RIF IMPL M
   World Health Organisation, 2011, RAP IMPL XPERT MTB R
   World Health Organization, 2010, 10 M
   World Health Organization, 2013, AUT REALT NUCL AC AM
   Wright CA, 2008, DIAGN CYTOPATHOL, V36, P245, DOI 10.1002/dc.20788
NR 26
TC 26
Z9 28
U1 0
U2 2
PU PUBLIC LIBRARY SCIENCE
PI SAN FRANCISCO
PA 1160 BATTERY STREET, STE 100, SAN FRANCISCO, CA 94111 USA
SN 1932-6203
J9 PLOS ONE
JI PLoS One
PD SEP 14
PY 2015
VL 10
IS 9
AR e0137471
DI 10.1371/journal.pone.0137471
PG 9
WC Multidisciplinary Sciences
WE Science Citation Index Expanded (SCI-EXPANDED)
SC Science & Technology - Other Topics
GA CR8KS
UT WOS:000361601100078
PM 26366871
OA Green Published, Green Submitted, gold
DA 2022-08-20
ER

PT J
AU Chaisson, LH
   Roemer, M
   Cantu, D
   Haller, B
   Millman, AJ
   Cattamanchi, A
   Davis, JL
AF Chaisson, Lelia H.
   Roemer, Marguerite
   Cantu, David
   Haller, Barbara
   Millman, Alexander J.
   Cattamanchi, Adithya
   Davis, J. Lucian
TI Impact of GeneXpert MTB/RIF Assay on Triage of Respiratory Isolation
   Rooms for Inpatients With Presumed Tuberculosis: A Hypothetical Trial
SO CLINICAL INFECTIOUS DISEASES
LA English
DT Article
DE GeneXpert; tuberculosis; infection control; molecular diagnostic
   techniques
ID HEALTH-CARE WORKERS; NEW-YORK-CITY; RESISTANT
   MYCOBACTERIUM-TUBERCULOSIS; INFECTION-CONTROL PROGRAMS; ACID
   AMPLIFICATION TESTS; CDC TB SURVEY; NOSOCOMIAL TRANSMISSION;
   COST-EFFECTIVENESS; PULMONARY TUBERCULOSIS; MEMBER HOSPITALS
AB Background. Placing inpatients with presumed active pulmonary tuberculosis in respiratory isolation pending results of serial sputum acid-fast bacilli (AFB) smear microscopy is standard practice in high-income countries. However, this diagnostic strategy is slow and yields few tuberculosis diagnoses. We sought to determine if replacing microscopy with the GeneXpert MTB/RIF (Xpert) nucleic acid amplification assay could reduce testing time and usage of isolation rooms.
   Methods. We prospectively followed inpatients at San Francisco General Hospital undergoing tuberculosis evaluation. We performed smear microscopy and Xpert testing on concentrated sputum, and calculated diagnostic accuracy for both strategies in reference to serial sputum mycobacterial culture. We measured turnaround time for microscopy and estimated hypothetical turnaround times for Xpert on concentrated and unconcentrated sputum. We compared median and total isolation times for microscopy to those estimated for the 2 Xpert strategies.
   Results. Among 139 patients with 142 admissions, median age was 54 years (interquartile range [IQR], 43-60 years); 32 (23%) patients were female, and 42 (30%) were HIV seropositive. Serial sputum smear microscopy and a single concentrated sputum Xpert had identical sensitivity (89%; 95% confidence interval [CI], 52%-100%) and similar specificity (99% [95% CI, 96%-100%] vs 100% [95% CI, 97%-100%]). A single concentrated sputum Xpert could have saved a median of 35 hours (IQR, 24-36 hours) in unnecessary isolation compared with microscopy, and a single unconcentrated sputum Xpert, 45 hours (IQR, 35-46 hours).
   Conclusions. Replacing serial sputum smear microscopy with a single sputum Xpert could eliminate most unnecessary isolation for inpatients with presumed tuberculosis, greatly benefiting patients and hospitals.
C1 [Chaisson, Lelia H.; Cattamanchi, Adithya; Davis, J. Lucian] Univ Calif San Francisco, San Francisco Gen Hosp, Div Pulm & Crit Care Med, San Francisco, CA USA.
   [Roemer, Marguerite; Cantu, David; Haller, Barbara] Univ Calif San Francisco, San Francisco Gen Hosp, Dept Lab Med, San Francisco, CA USA.
   [Millman, Alexander J.; Cattamanchi, Adithya; Davis, J. Lucian] Univ Calif San Francisco, San Francisco Gen Hosp, Dept Med, San Francisco, CA USA.
   [Cattamanchi, Adithya; Davis, J. Lucian] Univ Calif San Francisco, San Francisco Gen Hosp, Curry Int TB Ctr, San Francisco, CA USA.
RP Davis, JL (通讯作者)，San Francisco Gen Hosp, 1001 Potrero Ave,Rm 5K1, San Francisco, CA 94110 USA.
EM lucian.davis@ucsf.edu
RI Davis, J. Lucian/AAC-8376-2019
OI Davis, J. Lucian/0000-0002-8629-9992
FU American Lung Association [CG-197164]; University of California, San
   Francisco Center for AIDS Research; National Institutes of Health [K23
   AI080147, K23 HL094141]; NATIONAL HEART, LUNG, AND BLOOD INSTITUTE
   [K23HL094141] Funding Source: NIH RePORTER; NATIONAL INSTITUTE OF
   ALLERGY AND INFECTIOUS DISEASES [P30AI027763, K23AI080147] Funding
   Source: NIH RePORTER
FX This work was supported by the American Lung Association (grant number
   CG-197164 to J. L. D.), the University of California, San Francisco
   Center for AIDS Research (to J. L. D.), and the National Institutes of
   Health (grant numbers K23 AI080147 to J. L. D. and K23 HL094141 to A.
   C.). Cepheid donated all Xpert MTB/RIF cartridges and reagents.
CR [Anonymous], 1994, MMWR Recomm Rep, V43, P1
   Banada PP, 2010, J CLIN MICROBIOL, V48, P3551, DOI 10.1128/JCM.01053-10
   Behr MA, 1999, LANCET, V353, P444, DOI 10.1016/S0140-6736(98)03406-0
   BLUMBERG HM, 1995, ANN INTERN MED, V122, P658, DOI 10.7326/0003-4819-122-9-199505010-00003
   Boehme CC, 2010, NEW ENGL J MED, V363, P1005, DOI 10.1056/NEJMoa0907847
   Bossuyt PMM, 2000, LANCET, V356, P1844, DOI 10.1016/S0140-6736(00)03246-3
   Brunet L, 2010, AM J RESP CRIT CARE, pA2255
   Campos M, 2008, AM J RESP CRIT CARE, V178, P300, DOI 10.1164/rccm.200803-381OC
   Choi HW, 2013, INT J TUBERC LUNG D, V17, P1328, DOI 10.5588/ijtld.13.0095
   Conaty SJ, 2005, J INFECTION, V50, P187, DOI 10.1016/j.jinf.2004.03.010
   Cook S, 2003, INFECT CONT HOSP EP, V24, P807, DOI 10.1086/502141
   DALEY CL, 1992, NEW ENGL J MED, V326, P231, DOI 10.1056/NEJM199201233260404
   Davis JL, 2013, AM J RESP CRIT CARE, V187
   DIPERRI G, 1992, LANCET, V340, P1412, DOI 10.1016/0140-6736(92)92601-B
   DOOLEY SW, 1992, JAMA-J AM MED ASSOC, V267, P2632, DOI 10.1001/jama.267.19.2632
   Dorman SE, 2009, CLIN INFECT DIS, V49, P55, DOI 10.1086/599038
   Dowdy DW, 2003, J CLIN MICROBIOL, V41, P948, DOI 10.1128/JCM.41.3.948-953.2003
   Dylewski J, 2009, CLIN INFECT DIS, V49, P1456, DOI 10.1086/644497
   EDLIN BR, 1992, NEW ENGL J MED, V326, P1514, DOI 10.1056/NEJM199206043262302
   Fella P, 1995, AM J INFECT CONTROL, V23, P352, DOI 10.1016/0196-6553(95)90265-1
   FRIDKIN SK, 1995, INFECT CONT HOSP EP, V16, P129
   Guerra RL, 2007, CHEST, V132, P946, DOI 10.1378/chest.06-2959
   Handel DA, 2010, ACAD EMERG MED, V17, P840, DOI 10.1111/j.1553-2712.2010.00814.x
   Iademarco MF, 2013, MMWR-MORBID MORTAL W, V62, P821
   Jensen Paul A., 2005, Morbidity and Mortality Weekly Report, V54, P1
   Kent P. T., 1985, PUBLIC HLTH MYCOBACT
   Kurbatova EV, 2013, EUR J CLIN MICROBIOL, V32, P735, DOI 10.1007/s10096-012-1798-0
   Lippincott CK, 2014, CLIN INFECT DIS, V59, DOI 10.1093/cid/ciu212
   Lord Sarah J, 2009, Med Decis Making, V29, pE1, DOI 10.1177/0272989X09340584
   MALONEY SA, 1995, ANN INTERN MED, V122, P90, DOI 10.7326/0003-4819-122-2-199501150-00002
   Marks SM, 2013, CLIN INFECT DIS, V57, P532, DOI 10.1093/cid/cit336
   Mase SR, 2007, INT J TUBERC LUNG D, V11, P485
   Millman AJ, 2013, PLOS ONE, V8, DOI 10.1371/journal.pone.0079669
   Nicolau I, 2012, PLOS ONE, V7, DOI 10.1371/journal.pone.0042479
   Park PH, 2013, INT J TUBERC LUNG D, V17, P759, DOI 10.5588/ijtld.12.0739
   Schunemann HJ, 2008, BMJ-BRIT MED J, V336, P1106, DOI 10.1136/bmj.39500.677199.AE
   SCOTT B, 1994, ARCH INTERN MED, V154, P326, DOI 10.1001/archinte.154.3.326
   Steingart KR, 2014, COCHRANE DB SYST REV, DOI [10.1002/14651858.CD009593.pub3, 10.1002/14651858.CD009593.pub2]
   Tokars JI, 2001, INFECT CONT HOSP EP, V22, P449, DOI 10.1086/501933
   WENGER PN, 1995, LANCET, V345, P235, DOI 10.1016/S0140-6736(95)90228-7
   Wilmer A, 2011, CAN J INFECT DIS MED, V22, pE1, DOI 10.1155/2011/314686
   Wisnivesky JP, 2005, ARCH INTERN MED, V165, P453, DOI 10.1001/archinte.165.4.453
NR 45
TC 32
Z9 32
U1 0
U2 8
PU OXFORD UNIV PRESS INC
PI CARY
PA JOURNALS DEPT, 2001 EVANS RD, CARY, NC 27513 USA
SN 1058-4838
EI 1537-6591
J9 CLIN INFECT DIS
JI Clin. Infect. Dis.
PD NOV 15
PY 2014
VL 59
IS 10
BP 1353
EP 1360
DI 10.1093/cid/ciu620
PG 8
WC Immunology; Infectious Diseases; Microbiology
WE Science Citation Index Expanded (SCI-EXPANDED)
SC Immunology; Infectious Diseases; Microbiology
GA AT0TC
UT WOS:000344646700003
PM 25091300
OA Bronze, Green Published
DA 2022-08-20
ER

PT J
AU Aung, H
   Balasundaram, K
   Goss, J
   Patel, H
   Haldar, P
   Panchal, RK
AF Aung, H.
   Balasundaram, K.
   Goss, J.
   Patel, H.
   Haldar, P.
   Panchal, R. K.
TI THE DIAGNOSTIC WORK UP OF PLEURAL TUBERCULOSIS AND THE UTILITY OF
   GENEXPERT: 5 YEAR EXPERIENCE FROM A TERTIARY CENTRE
SO THORAX
LA English
DT Meeting Abstract
C1 [Aung, H.; Balasundaram, K.; Goss, J.; Patel, H.; Haldar, P.; Panchal, R. K.] Univ Hosp Leicester NHS Trust, Leicester, Leics, England.
NR 0
TC 0
Z9 0
U1 0
U2 0
PU BMJ PUBLISHING GROUP
PI LONDON
PA BRITISH MED ASSOC HOUSE, TAVISTOCK SQUARE, LONDON WC1H 9JR, ENGLAND
SN 0040-6376
EI 1468-3296
J9 THORAX
JI Thorax
PD NOV
PY 2021
VL 76
SU 2
MA S41
BP A30
EP A31
DI 10.1136/thorax-2021-BTSabstracts.47
PG 2
WC Respiratory System
WE Science Citation Index Expanded (SCI-EXPANDED)
SC Respiratory System
GA XB5GY
UT WOS:000721358900048
OA Bronze
DA 2022-08-20
ER

PT J
AU Abong, J
   Dalay, V
   Langley, I
   Tomeny, E
   Marcelo, D
   Mendoza, V
   Aquino, AC
   Garfin, AMC
   Squire, B
   Yu, C
AF Abong, Jovilia
   Dalay, Victoria
   Langley, Ivor
   Tomeny, Ewan
   Marcelo, Danaida
   Mendoza, Victor
   Christian Aquino, Arvin
   Celina Garfin, Anna Marie
   Squire, Bertie
   Yu, Charles
TI Use of GeneXpert and the role of an expert panel in improving clinical
   diagnosis of smear-negative tuberculosis cases
SO PLOS ONE
LA English
DT Article
AB Setting
   A high proportion of notified tuberculosis cases in the Philippines are clinically diagnosed (63%) as opposed to bacteriologically confirmed. Better understanding of this phenomenon is required to improve tuberculosis control.
   Objectives
   To determine the percentage of smear negative presumptive tuberculosis patients that would be diagnosed by GeneXpert; compare clinical characteristics of patients diagnosed as tuberculosis cases; and review the impact that the current single government physician and a reconstituted Tuberculosis Diagnostic committee (expert panel) may have on tuberculosis over-diagnosis.
   Design
   This a cross-sectional study of 152 patients 1585 years old with two negative Direct Sputum Smear Microscopy results, with abnormal chest X-ray who underwent GeneXpert testing and review by an expert panel.
   Results
   Thirty-two percent (48/152) of the sample were Xpert positive and 93% (97/104) of GeneXpert negatives were clinically diagnosed by a single physician. Typical symptoms and X-ray findings were higher in bacteriologically confirmed tuberculosis. When compared to the GeneXpert results the Expert panel's sensitivity for active tuberculosis was high (97.5%, 39/40), specificity was low (40.2%, 35/87).
   Conclusion
   Using the GeneXpert would increase the level of bacteriologically confirmed tuberculosis substantially among presumptive tuberculosis. An expert panel will greatly reduce over-diagnosis usually seen when a decision is made by a single physician.
C1 [Abong, Jovilia; Dalay, Victoria; Marcelo, Danaida; Mendoza, Victor; Christian Aquino, Arvin; Yu, Charles] De La Salle Med & Hlth Sci Inst, Res Div, Dasmarinas City, Cavite, Philippines.
   [Langley, Ivor; Tomeny, Ewan; Squire, Bertie] Univ Liverpool Liverpool Sch Trop Med, Collaborat Appl Hlth Res & Delivery, Liverpool, Merseyside, England.
   [Celina Garfin, Anna Marie] Natl TB Control Program, Dept Hlth, Manila, Metro Manila, Philippines.
RP Abong, J (通讯作者)，De La Salle Med & Hlth Sci Inst, Res Div, Dasmarinas City, Cavite, Philippines.
EM joviliabong@gmail.com
OI Squire, Stephen/0000-0001-7173-9038
FU Philippine Council for Health Research and Development (PCHRD)
   [FP160005]
FX This study was part of a larger project called the Newton Agham Fund
   Impact Assessment of Diagnostic Algorithms and Tools for Multi Drug
   Resistant (MDR-TB) and Drug Sensitive Tuberculosis (TB) in the
   Philippines (TBFIT) which was supported by the Philippine Council for
   Health Research and Development (PCHRD): Project Number FP160005 which
   the grant was awarded to CYY. More details on PCHRD can be seen on this
   link
   (pchrd.dost.gov.ph/index.php/programs-and-services/supported-projects?
   download=994:pchrdsupported-projects). All funders had no role in study
   design, data collection and analysis, decision to publish, or
   preparation of the manuscript. There was no additional external funding
   received for this study.
CR Collins J, 2007, CHEST RADIOLOGY ESSE
   Corne J., 2015, CHEST XRAY MADE EASY
   Department of Health, 2014, UPD TB CONTR PROGR C
   Department of Health, 2014, NAT TB CONTR PROGR M
   Department of Health, 2019, INT TUB INF SYST
   Fraser C, 1999, NY TIMES BK REV, P4
   Ko Y, 2018, PLOS ONE, V13, DOI 10.1371/journal.pone.0201748
   Linguissi Laure Stella Ghoma, 2015, BMC Res Notes, V8, P804, DOI 10.1186/s13104-015-1774-8
   Lombardi G, 2017, PLOS ONE, V12, DOI 10.1371/journal.pone.0176186
   Marcelo A, 2011, ONLINE METHOD DIAGNO, P168
   Philippine Statistics Authority, 2018, 2018 PHIL STAND GEOG
   Rai DK, 2015, J EVOL MED DENT SCI-, V4, P17034, DOI 10.14260/jemds/2015/2578
   Shrestha P, 2015, TUBERCULOSIS RES TRE, V2015, P1
   Sillano RMM, 2017, PHILIPP J CHEST DIS, V18, P9
   Soto A, 2008, BRAZ J INFECT DIS, V12, P128, DOI 10.1590/S1413-86702008000200006
   Steingart KR, 2014, COCHRANE DB SYST REV, DOI [10.1002/14651858.CD009593.pub3, 10.1002/14651858.CD009593.pub2]
   The Brewers of Europe, 2019, COUNTRY PROFILES
   WHO, 2016, AMBIENT AIR POLLUTIO
   WHO, 2017, WHO TECHN REP SER
NR 19
TC 4
Z9 4
U1 0
U2 0
PU PUBLIC LIBRARY SCIENCE
PI SAN FRANCISCO
PA 1160 BATTERY STREET, STE 100, SAN FRANCISCO, CA 94111 USA
SN 1932-6203
J9 PLOS ONE
JI PLoS One
PD DEC 30
PY 2019
VL 14
IS 12
AR e0227093
DI 10.1371/journal.pone.0227093
PG 11
WC Multidisciplinary Sciences
WE Science Citation Index Expanded (SCI-EXPANDED)
SC Science & Technology - Other Topics
GA KN8JV
UT WOS:000515092200073
PM 31887127
OA Green Accepted, Green Published, gold
DA 2022-08-20
ER

PT J
AU Usman, S
AF Usman, S.
TI Impact of geneXpert MTB/RIF for rapid tuberculosis diagnosis and
   rifampicin resistance detection among PLWHIV in South-Western Nigeria
SO JOURNAL OF THE INTERNATIONAL AIDS SOCIETY
LA English
DT Meeting Abstract
C1 [Usman, S.] APIN Publ Hlth Initiat, Lab Serv, Abuja, Nigeria.
NR 0
TC 0
Z9 0
U1 0
U2 0
PU JOHN WILEY & SONS LTD
PI CHICHESTER
PA THE ATRIUM, SOUTHERN GATE, CHICHESTER PO19 8SQ, W SUSSEX, ENGLAND
EI 1758-2652
J9 J INT AIDS SOC
JI J. Int. AIDS Soc.
PD OCT
PY 2018
VL 21
SU 8
SI SI
MA P144
PG 1
[truncated: 230,950 more chars]
